# Supplementary material for: Determining the numbers of a landscape architect species (Tapirus terrestris), using footprints
Source: PeerJ. 2018 Mar 29;6:e4591. doi: 10.7717/peerj.4591 (PMC5878928; doi:10.7717/peerj.4591)
Supplement: Supplemental Information 6 — Columns X1 to X22, Y1 to Y22, V1 to V91, and area1 to area6 are measurements calculated by the FIT algorithm. Latitude and longitude are in decimal degrees. Trail is an unbroken series of footprints made by the same animal. Trails were randomly divided into sub-trails for test analyses. [file peerj-06-4591-s006.xlsx]

## Sheet: Lowland Tapir Training Database
Tapir	TRAIL	V1	V2	V3	V4	V5	V6	V7	V8	V9	V10	V11	V12	V13	V14	V15	V16	V17	V18	V19	V20	V21	V22	V23	V24	V25	V26	V27	V28	V29	V30	V31	V32	V33	V34	V35	V36	V37	V38	V39	V40	V41	V42	V43	V44	V45	V46	V47	V48
C1	C1	4.7357	6.60473	4.1667	4.31831	4.04991	3.22018	2.55197	4.9755	4.33062	6.98625	4.06811	3.89621	5.59498	4.38869	5.7805	6.93431	4.80134	4.21668	6.02624	7.26585	8.18913	9.88934	12.4043	11.973	2.08226	7.40303	3.22232	5.65569	7.43476	2.25343	0.189426	5.9316	7.00284	7.62391	8.02472	1.15056	2.43937	3.32575	2.08573	4.96552	6.149	8.31607	2.5238	1.74736	2.96642	2.81063	3.99956	3.42828
C1	C1	4.50834	5.71732	5.0055	3.83775	3.02954	3.4302	2.66814	4.36709	4.04367	6.34321	4.87157	3.04124	5.25549	3.79608	6.22803	6.6709	4.93322	4.08875	6.74185	6.33573	8.23877	8.5327	11.0611	11.3601	2.08434	7.77973	3.40193	5.80458	7.48906	2.22641	0.689088	6.35597	5.84331	7.4467	7.86577	0.971848	2.03734	2.94664	3.05718	4.20893	7.90888	7.12538	3.78024	1.7879	2.67271	2.34363	5.02747	3.47949
C1	C1	5.68243	6.29357	4.58922	5.08229	3.32614	3.65722	2.75007	6.21121	4.49656	7.39894	4.6354	4.61773	5.36656	4.22156	6.33684	7.88002	4.63603	4.2025	6.97771	8.59024	9.00879	10.5961	12.7166	12.9981	1.92969	8.14053	3.24068	6.60092	8.13721	2.54645	1.13459	5.86489	7.63839	7.63466	8.08661	1.3759	2.24681	3.51136	2.44598	5.3988	7.32307	10.4963	3.34016	1.47297	3.36454	3.5314	4.49338	3.49281
C1	C1	4.10404	6.50819	5.37476	3.76011	5.27247	2.8016	2.81306	4.20482	7.09084	5.08392	5.28614	4.90647	6.21559	6.61052	5.79781	5.80781	4.22516	5.7433	6.21615	6.46942	10.3033	8.79097	12.2355	12.664	2.52456	6.45062	2.55515	4.44708	6.3596	0.951187	1.35794	7.15363	7.53227	7.05903	7.73609	1.41049	4.16905	3.81895	3.04223	2.83251	6.59549	7.14737	2.55543	2.34906	1.8938	3.42393	4.50773	3.18472
C1	C1	6.38548	7.54005	2.88052	5.36437	4.59076	2.36316	1.80027	6.41105	5.35964	5.10265	4.67886	4.40065	7.0224	5.10052	4.0661	5.42432	6.13345	4.40778	7.81002	7.83135	9.86875	10.1734	12.6894	12.6073	0.981591	5.5745	2.43556	4.73317	5.58632	1.96861	0.642494	7.28741	7.33615	6.65261	6.71749	1.2012	2.78636	3.07317	1.68371	3.72672	9.14008	9.21631	3.20368	2.46542	2.51727	3.20851	4.54071	3.57679
C1	C1	5.1578	5.88278	5.24067	4.54384	3.604	3.53616	2.6592	5.21347	5.00296	6.24056	3.93533	3.67218	5.17897	4.5358	6.3929	6.7746	4.5558	3.96584	7.00087	7.09598	8.50665	9.4814	12.4337	12.1842	2.45851	6.75893	2.79025	5.60036	7.40368	1.84965	0.787024	6.40144	6.56378	8.04122	8.02657	1.1518	2.74358	3.34642	3.16853	4.1254	7.76665	8.00662	2.92967	2.37769	2.84172	2.62859	3.83647	4.43458
C1	C1	3.85969	7.11775	3.96905	3.45042	4.55439	2.77852	2.57829	3.98391	5.13497	6.30867	4.79991	3.70547	6.10758	5.20055	5.44489	6.25157	4.90379	4.5179	6.26549	6.4633	7.84839	9.20626	11.6379	10.8627	1.66193	6.77838	2.63088	5.29404	6.61354	2.03393	0.227748	6.81883	7.23342	7.64228	8.15617	0.673837	2.49453	3.41492	2.07089	4.23889	6.9612	7.45829	3.46583	1.69828	2.40014	3.13217	4.43194	3.53324
C1	C1	4.81032	5.40659	5.13679	4.27149	2.97352	2.95974	3.4291	4.93996	3.4076	7.41995	4.09199	3.46891	4.48483	3.30696	6.42106	7.57123	4.22011	3.62397	6.43658	6.94231	8.1268	9.2737	11.1954	10.7671	1.84607	7.97783	2.71297	6.36567	7.68143	1.78031	0.500665	5.67438	6.21259	7.77598	8.00793	0.900297	1.99	3.00711	2.61201	4.78293	7.02715	7.95415	3.24952	1.58447	2.91614	2.5474	4.49455	3.54606
C2	C2	5.2587	3.97785	6.91288	4.64304	2.7216	4.36504	2.52906	5.41465	4.86821	6.34548	3.87879	4.83768	3.40152	4.44753	7.60604	7.17802	3.73549	4.05292	6.9501	7.36042	9.97113	9.27225	13.2478	12.1146	4.45022	8.62751	2.80189	6.54414	8.78647	0.988075	1.63408	5.8175	6.35371	7.43298	7.36203	2.44994	3.32118	2.87611	4.83519	4.36714	7.64079	8.49709	2.35467	2.79854	2.44318	3.28736	4.49431	3.73232
C2	C2	5.33764	4.76313	5.73464	4.4929	2.63938	2.98828	3.20872	5.20732	4.17212	6.06935	4.32928	3.61381	4.22279	3.88881	6.43691	6.79835	3.6198	4.0323	7.21529	6.87165	8.58044	8.41161	11.0377	10.8219	1.99809	7.67562	2.24195	6.17797	7.27667	1.10721	1.57099	6.24284	5.82049	7.43081	7.56731	1.58808	2.27339	2.43381	3.48885	3.68231	8.52746	7.83189	3.53527	2.11821	1.99333	3.20406	4.3952	3.53559
C2	C2	6.06007	4.3691	6.67979	5.09491	2.53691	3.69252	3.05977	5.8932	4.18443	6.56022	4.7233	4.18513	3.85527	3.9252	7.42825	7.16022	3.56427	3.97897	7.67588	7.60356	9.7011	9.55542	12.3618	12.4935	2.97432	9.27197	3.19983	6.91653	8.64263	1.27306	1.38651	6.3951	6.0713	7.51529	7.57051	2.27759	2.49188	2.64341	4.38762	4.24754	9.02414	8.60771	3.87342	1.95658	2.37805	3.18084	4.93799	3.36555
C2	C2	6.21346	5.88702	5.4614	5.16571	3.33296	2.97828	3.12354	5.68684	4.49575	5.89084	4.69004	4.07434	5.53181	3.86294	5.9143	6.82401	5.03981	3.42432	8.23392	6.68213	11.2427	8.43478	13.5022	11.0347	3.00176	6.31263	1.54485	5.55832	7.71717	0.848925	1.46143	7.17222	5.44046	7.18872	7.2879	2.33228	3.68124	2.36273	3.36999	3.3047	9.86514	6.61726	2.61831	3.75654	1.56904	2.70707	5.1191	3.40789
C2	C2	6.02899	3.96633	6.6928	5.17913	2.56009	3.36323	3.23328	5.9689	4.30814	6.24475	4.03048	4.18451	3.64916	3.79677	7.11522	7.11065	3.63825	3.61732	7.49964	7.39494	10.1334	9.30312	12.3773	11.7421	3.17407	8.05797	2.32475	6.53888	8.49354	0.808583	1.50614	6.01378	5.85076	7.20459	7.20493	1.86944	3.10038	2.71923	4.24489	3.80232	8.51046	8.24566	3.24354	2.19901	2.76299	2.50427	4.5233	3.78309
C2	C2	5.62659	4.80743	6.90822	4.48711	3.01189	2.29334	4.03779	5.141	4.40213	6.30242	6.06561	4.04841	4.95445	4.08926	7.06465	6.79172	4.53772	3.36947	8.32073	6.93375	10.1838	8.80068	11.2477	10.791	2.1355	8.55556	1.9526	7.24417	9.01275	1.32033	1.03471	7.6577	6.05502	7.43848	7.51428	3.38513	2.41505	2.68722	4.40326	3.42248	10.402	7.79534	4.61368	2.42416	2.56239	2.70523	6.27712	3.07333
C2	C2	6.09438	4.33467	6.59231	5.14627	2.81164	3.07842	3.337	6.01644	4.78109	6.00615	4.5908	3.98364	3.94528	4.37286	7.09682	6.81842	3.65656	4.14587	7.7828	7.60755	9.63705	8.9497	12.0561	11.7765	2.57966	8.1169	2.09097	6.65644	8.00933	0.891406	1.59261	6.48757	6.26136	7.68987	8.04592	1.49481	2.3238	2.33308	4.17343	3.59767	9.10304	8.71938	3.56641	2.2837	2.89653	2.70461	5.06068	3.46153
C2	C2	7.03194	3.64124	6.74149	5.70922	2.25754	3.08321	3.08898	6.69061	4.27534	5.60341	4.30767	3.85361	3.42449	3.85558	7.14495	6.44449	3.15227	3.69688	8.35838	7.66038	10.0762	9.15112	12.4731	11.6736	2.96695	8.23956	1.94255	6.89211	8.69325	0.985119	1.5651	6.48591	5.60646	7.03807	7.0205	1.99505	2.73942	2.28171	4.60973	3.36826	10.21	8.59594	3.25836	2.82966	2.31534	2.81872	4.42674	3.75905
C3		6.93258	4.51752	5.42398	5.72927	2.84822	2.85597	2.51172	6.74616	3.6846	5.98958	3.88057	3.31009	4.34968	3.29937	5.60784	6.55033	3.87435	3.45194	7.69597	7.99329	9.43775	9.45659	12.6008	11.7491	2.81536	7.37695	2.18983	6.25359	8.00497	0.331219	1.00621	6.12759	6.00978	7.03072	7.23507	2.17094	2.28358	2.65911	3.56739	4.14563	9.04991	9.14395	2.8392	2.50566	2.52575	2.89053	4.35107	4.08062
C3		6.48758	4.63624	4.44548	5.6061	2.80288	2.74027	2.30463	6.6977	4.33321	5.04264	2.48283	3.76319	4.29304	4.02541	5.17541	5.56844	4.20601	4.01881	7.14387	7.69667	8.43639	9.13399	11.7722	11.7243	2.09602	6.31378	2.11305	5.01158	6.59013	1.44395	1.09309	5.31647	5.89359	7.0132	6.79265	0.645381	2.67706	2.0735	2.69437	3.37968	7.69386	8.93917	1.85701	2.63099	2.44784	2.7676	2.77071	4.0172
C3	C3	7.40283	4.94588	5.32256	6.41331	3.41481	2.73053	2.75055	7.55627	4.74666	5.73462	3.70162	4.37316	4.82002	4.49743	5.45896	6.38477	4.19986	3.9356	8.08468	8.61361	9.96517	10.4272	13.3038	13.1766	2.42237	7.38349	2.39026	5.69818	7.30803	0.266833	1.51916	6.10107	6.57422	7.3956	7.31929	1.29516	2.46016	2.3969	3.21497	3.72918	8.62182	9.74753	2.60646	2.40351	2.48154	3.18809	4.13745	3.39254
C3	C3	6.08969	5.43038	4.79782	5.29922	3.76804	2.25273	2.87977	6.26084	4.32663	6.18904	2.82434	3.30654	5.24308	4.15237	5.04921	6.47335	4.59412	3.8687	7.2504	7.77655	8.66984	9.298	12.2233	11.9395	2.13607	7.28916	2.46846	5.75914	7.52615	0.6136	0.782074	6.26624	6.77726	7.90497	7.89402	1.10434	2.92945	3.05976	2.67941	4.06811	7.94911	9.02588	2.50353	2.47908	3.00053	2.6646	2.9732	5.24191
C3	C3	6.09842	5.35233	4.96865	5.18099	3.48455	2.74501	2.53875	6.04771	4.239	5.99616	3.67927	3.5605	4.84762	4.17421	5.64496	6.08112	4.04403	3.66228	7.40628	7.50699	9.21813	9.36976	12.4454	11.8657	2.44933	7.67488	2.67253	5.78775	7.46432	1.11541	0.325091	6.41595	6.37474	7.23013	7.24147	2.09676	2.92169	3.02122	3.09144	4.06097	8.51014	8.55296	3.18922	2.16045	2.69558	2.68507	3.58768	4.56535
C3	C3	6.63339	6.11392	4.69293	5.62144	4.41385	2.09635	2.64804	6.54773	4.83092	5.8364	4.05676	3.37112	5.94708	4.79851	4.91931	5.8782	5.15883	3.98276	7.97445	7.90035	9.71345	9.62312	13.2043	12.592	2.33969	7.55744	2.68006	5.58084	7.51888	0.59764	0.225991	7.21806	7.04898	7.67328	7.7887	1.23775	2.70329	3.2528	2.81093	3.82443	9.17783	8.90875	3.39794	2.29149	2.78901	2.73268	4.27279	4.7286
C3	C3	5.91502	4.61876	4.99666	5.14005	3.224	2.74312	2.3885	5.98102	3.95927	5.76343	2.88634	3.1629	4.3154	3.7195	5.35398	6.05352	3.81913	3.33832	7.02496	7.12978	8.41885	9.04671	11.6526	11.9329	2.20035	7.1554	2.94697	5.45389	6.91516	0.606783	0.551852	5.75712	5.9156	7.22062	7.15908	1.42803	2.76642	2.68448	3.15539	3.90254	7.71559	7.99925	2.13151	2.66563	2.91351	2.04039	3.06403	4.51156
C3	C3	7.74593	4.14895	6.3492	6.015	2.42143	2.85145	2.87932	6.95481	3.65845	5.76748	5.00947	3.46504	3.79306	3.33915	6.7795	6.26365	3.60141	3.59003	8.78791	7.78405	10.1886	9.65526	12.2026	12.0628	2.22616	8.47105	2.43735	6.89754	7.85902	0.723377	0.974567	6.96575	5.39174	6.9782	6.93008	1.72284	2.20161	2.18953	4.45847	3.61676	11.2887	8.43399	3.97133	2.53415	2.07554	2.77799	5.39683	3.37293
C3	C3	5.44047	5.05943	4.53732	4.6034	4.00404	1.95143	2.16471	5.48581	5.37833	4.29839	3.87308	4.19863	5.07604	5.18626	4.52256	4.67563	4.21528	3.85175	6.77712	7.09985	9.10909	8.63357	11.621	11.0011	2.82317	6.0531	1.6937	4.76252	7.05925	0.0954597	0.990087	6.46006	6.65011	6.22604	6.11256	1.91668	2.86594	2.89289	2.92187	2.76777	7.87402	8.38969	2.6794	2.34808	2.40836	2.94718	4.21887	3.65016
C3	C3	5.82224	3.85982	4.84325	4.88955	2.81119	2.51547	1.98223	6.26953	4.67522	4.69645	3.23545	3.93355	3.61882	4.64348	5.17854	4.90267	3.37311	4.68992	6.71629	7.72975	8.34703	9.27726	10.819	11.3438	2.37198	7.57333	2.4427	5.58413	7.01216	0.698049	0.916139	5.46008	6.54519	6.08737	6.23288	1.29435	2.34749	2.73541	3.34063	3.40322	7.76589	9.91145	2.70288	1.95031	2.57875	3.36003	3.57916	4.09047
C4		4.22201	4.12051	6.42363	3.78099	3.31898	2.89607	3.22766	4.45489	4.06219	7.06355	3.95581	3.73332	3.84506	4.03942	6.73181	7.08657	3.25783	3.32841	6.36101	6.6532	7.92971	8.43058	10.5001	11.6187	2.34724	8.71541	3.66538	6.60871	8.01663	0.497699	0.0420604	5.91208	6.59397	7.84483	8.12006	1.18154	2.19017	2.87904	3.894	4.57072	6.99916	7.83459	3.18067	1.81743	2.29718	3.29745	4.31935	3.70638
C4	C4	4.07808	4.68937	6.52212	3.78694	3.69669	2.95487	3.75952	4.30925	5.97648	5.87056	3.6916	4.74747	4.24606	5.32835	7.10612	6.84725	4.17142	4.57093	5.72611	6.69438	7.98823	10.1249	11.0335	11.2159	2.61167	6.63916	1.83855	5.29921	6.88293	1.01222	1.62341	5.61354	6.7025	8.02054	7.6069	1.23229	2.97246	3.64663	3.36284	3.10024	5.80884	7.57713	2.0989	2.16064	2.90156	2.65459	4.1966	3.55771
C4	C4	4.92157	4.18993	7.24302	4.23855	2.24454	4.04935	3.55239	4.55945	4.13589	6.45585	4.22556	2.84177	3.60297	3.10843	8.04028	7.87844	3.96466	3.4259	7.35284	5.63218	9.09672	7.48475	11.5806	11.0852	2.83046	7.64768	2.73279	6.06736	7.57278	1.25204	1.8509	6.32943	4.41305	8.60818	8.52533	2.38799	2.44188	1.95908	4.59735	3.38095	8.51052	5.39068	3.06575	2.88372	1.86091	1.90897	5.14791	3.29725
C4	C4	4.76126	4.51689	6.30495	4.12588	3.70234	3.02483	2.65052	4.59489	4.59764	5.84607	4.78512	4.63537	4.21378	4.52636	6.66655	5.9207	3.42788	2.802	6.8709	6.10827	9.54898	9.04004	11.7313	11.7853	3.07742	8.1301	3.2834	5.72431	7.60239	0.644949	0.15014	6.58066	5.87226	6.53186	6.32523	1.94774	3.57176	3.37251	4.23452	3.64449	7.87073	6.52692	3.10962	2.35759	1.97285	2.56191	4.51171	2.95751
C4	C4	3.82035	5.27334	6.11887	3.53808	3.88949	2.05276	4.60823	3.92864	4.25332	7.46179	3.97389	4.26104	4.95692	4.20572	6.50288	7.67489	3.37754	5.61045	5.45319	6.32486	7.82372	8.83219	10.3528	10.5173	1.78225	7.76325	2.68195	5.65231	7.08807	0.710557	0.95638	5.74515	6.46485	8.26273	8.68889	1.73828	2.56056	2.42179	2.49582	3.91196	5.59148	6.95092	2.52589	1.66316	2.11077	3.09455	3.76016	2.44591
C4	C4	4.18718	5.57708	5.50864	3.80908	3.17189	2.69429	4.2185	4.22966	3.97506	7.22312	3.71512	3.66151	4.5429	3.78807	7.05558	7.44664	4.29483	3.73472	5.98714	6.16893	7.62716	8.50373	10.2234	10.503	1.06756	7.01307	2.54703	5.62941	6.39039	2.13949	0.477104	5.59689	5.80378	8.5736	8.60815	1.53647	2.041	2.26236	2.4255	3.88044	6.35797	6.69122	2.63075	1.98706	2.85512	2.00221	4.09358	2.83858
C4	C4	4.14885	4.50953	6.91933	3.77023	3.03064	3.01792	4.33732	4.22444	4.13828	7.4988	4.13078	4.2481	3.84692	3.98249	7.89597	7.67446	3.61881	3.11833	6.16565	6.37593	8.008	9.42373	10.6935	10.9547	2.30023	8.15577	2.84958	6.28427	7.81402	1.53521	0.364129	5.69928	6.01327	8.11173	7.93909	2.18276	2.81968	3.28788	3.51266	4.09491	6.61047	7.04764	2.06757	2.78233	2.18075	2.99104	4.23403	3.38408
C4	C4	4.62751	4.17822	6.79805	4.06767	3.13889	2.26636	4.24309	4.64775	4.20855	6.81573	4.56479	3.92183	3.78747	4.11704	7.29447	6.94354	3.31617	3.27364	6.5481	6.78945	9.0273	8.84033	10.8024	10.1922	2.46394	7.97693	1.84536	6.53916	8.02679	0.857481	0.447568	6.0613	6.23073	7.27506	7.62268	2.0213	2.85394	3.2613	3.64758	3.74821	7.33808	7.68483	3.14886	2.01416	2.6948	2.71283	4.70892	3.61937
C4	C4	4.64852	4.93895	6.59066	4.12331	2.66815	3.1947	4.3641	4.65597	3.86746	7.68063	4.1166	3.84689	3.81858	3.50802	7.95401	8.20027	3.66112	3.57817	6.63657	6.86458	8.83972	9.15685	10.2919	11.7479	1.30627	8.69842	3.36939	6.68012	7.26227	1.69874	1.00026	5.89714	6.04976	8.29198	8.38843	1.31357	2.73715	3.08538	3.35129	4.35229	7.34705	7.65114	2.99644	2.24115	2.49392	2.95883	4.47554	3.95748
C5		5.14869	3.41397	5.79134	4.2046	2.21774	2.43983	2.85981	5.0098	3.96054	4.99644	3.87685	3.43532	3.15434	3.57795	6.19384	5.60425	3.19632	3.42676	6.57317	6.63613	8.25336	7.76473	9.99792	9.45022	2.36832	6.946	1.36509	6.08601	7.40182	0.84631	1.11363	5.65021	5.46166	6.26354	6.38575	1.25115	2.1717	2.33107	3.77537	3.08512	8.02646	7.86048	3.11611	2.03389	2.13209	2.92836	4.35324	3.46332
C5	C5	5.18889	4.60713	4.80775	4.36639	2.39097	2.83334	2.69821	5.16225	3.69119	5.67537	4.08739	3.42227	4.13373	3.3544	5.66573	6.25359	3.90874	3.70132	6.70366	6.63561	8.57556	8.2797	10.6222	9.99572	2.01732	6.70872	1.94129	5.67544	7.08609	1.51135	1.13158	5.62054	5.5392	6.32287	6.67868	1.19606	2.2426	2.46759	2.92621	3.6858	7.89004	7.7504	3.15614	1.94397	2.25117	2.74624	4.32981	3.33866
C5	C5	5.58264	3.59599	5.0296	4.86119	2.14569	2.65396	2.71124	5.80481	3.67628	5.29258	3.26518	3.22781	3.16844	3.35244	5.77148	5.7707	3.19844	3.40531	6.64497	6.70388	8.33574	8.29034	10.1528	10.5365	1.73005	6.71723	2.21372	5.36973	6.44783	1.28617	0.908288	4.86739	5.23957	6.10464	6.29562	1.19917	2.20127	2.47052	3.03702	3.31321	7.27906	7.79224	2.94499	1.48452	2.36105	2.37006	3.60374	3.46061
C5	C5	4.68129	3.85912	5.19755	3.80531	3.1032	2.54827	1.7105	4.43141	4.36429	4.20896	3.2397	3.18418	3.76328	4.12638	5.30067	4.53186	3.36118	3.80429	6.49953	5.81667	8.1724	7.42021	10.6005	9.86126	3.03012	6.77167	2.08712	5.21999	6.81431	0.205028	0.667142	6.11811	5.38066	6.26397	6.12649	2.30335	2.93005	2.11581	3.93464	2.87759	7.99565	6.67013	2.51103	2.76035	1.81163	2.58597	3.59827	4.01251
C5	C5	4.72267	3.55051	5.24347	3.87566	2.23522	2.48239	2.49916	4.63985	3.91312	4.72665	3.72474	3.49887	3.29808	3.56749	5.64035	5.33388	3.36774	3.5415	6.25048	6.22581	7.88739	7.48744	9.37897	9.38662	2.02247	6.76747	1.76468	5.60697	6.78204	0.844506	1.16295	5.45047	5.29983	6.0562	6.04602	1.63654	2.01358	2.11159	3.47418	2.99964	7.60307	7.4239	3.44754	1.50367	1.89323	2.93769	4.30642	3.09005
C5	C5	4.68455	3.69631	5.31635	3.98073	2.72288	2.61693	2.31877	4.59945	3.70837	5.14057	3.95298	3.09165	3.4562	3.51107	5.57295	5.43287	2.8557	3.42255	6.20532	5.95116	8.23551	7.78345	9.97121	10.1598	2.32683	7.31458	2.62566	5.3782	6.35891	0.364572	0.683915	5.47946	5.19905	5.85806	6.12521	1.42023	2.35331	2.6944	3.56367	3.34069	7.22979	6.72787	2.72763	2.03022	2.2019	2.23498	4.18459	3.27347
C5	C5	4.64877	4.24425	5.4696	4.02382	2.85128	2.96487	2.59184	4.49877	3.35862	6.0418	3.91662	3.44636	3.74575	3.27848	6.08002	6.12464	3.40635	2.78603	6.31314	5.81934	8.54437	8.48932	10.3544	10.7964	2.18512	7.24835	3.27602	5.48216	6.80454	0.915242	0.135094	5.63865	5.0797	6.35244	6.3368	1.274	2.8348	2.79959	3.47751	3.89982	7.19269	6.21591	2.88524	1.98552	2.40903	1.8107	4.08388	3.30314
C5	C5	4.15563	2.58359	6.30367	3.76512	2.89206	3.19667	1.9634	4.27606	4.5387	4.60612	2.60227	3.33239	2.80269	3.96755	6.10021	5.31846	3.17803	3.5457	5.47687	5.58331	8.29488	7.26496	10.5426	10.4845	3.79101	7.03078	2.49733	5.1289	6.67472	0.321537	1.03036	4.82092	5.13534	6.55064	6.58806	1.60374	2.67005	2.06267	4.62181	2.99918	5.73804	6.15143	1.87201	2.05451	2.06608	2.12628	4.03146	3.28264
C5	C5	4.44533	3.02413	5.66278	3.86754	2.23312	2.73505	2.58965	4.45289	3.91315	4.78852	2.45703	3.26944	2.71527	3.48452	6.0191	5.5167	3.35319	3.60533	5.60727	5.96336	7.95149	7.55761	10.0267	9.05858	3.03997	6.19314	1.36757	5.22481	6.60546	0.541733	1.27659	4.73948	4.95175	6.52849	6.25729	1.40207	2.59123	2.11542	3.60301	2.88883	6.25362	6.74796	1.96946	2.17163	1.765	2.70343	3.6288	3.68606
C6	C6A	5.13554	4.63783	6.53512	4.74851	2.55068	3.36813	4.41213	5.3558	3.42813	8.22403	3.19865	3.58215	3.61685	3.18709	7.93533	8.54961	3.30258	3.6372	6.38064	7.17776	7.94963	9.87214	11.4981	11.5458	2.1431	8.10616	2.91878	6.41536	7.85251	1.86576	0.693749	4.96409	5.95929	8.83072	8.85207	0.762872	2.21914	2.88658	2.97706	4.7691	6.2178	7.8597	2.3468	1.9161	2.56293	2.82441	3.35714	3.78447
C6	C6A	5.69064	4.66453	5.82251	5.01792	2.53763	3.08167	3.62801	5.88411	3.28196	7.56163	4.0169	3.55905	4.1086	3.04301	6.73568	7.9515	5.3124	3.35772	7.04591	7.56638	10.8644	9.0802	12.2918	10.8414	2.82999	7.91775	2.10205	6.82305	8.9866	1.54688	0.881271	5.55921	6.20565	7.1462	8.00207	2.10831	2.82495	3.00221	3.13213	4.85287	7.63024	8.73607	2.07885	2.86738	2.72778	2.94256	5.64673	4.20746
C6	C6A	6.50046	4.36395	6.04511	5.80758	2.79099	3.23355	3.27503	7.04166	3.97245	7.30322	3.44119	3.98224	3.91683	3.64864	6.68051	7.7487	3.79605	3.68515	7.54852	8.51817	10.1091	9.77125	13.4841	12.0352	3.46941	7.93595	2.12065	6.87485	9.41386	1.11341	0.87403	5.50029	6.9037	7.55177	8.04316	2.36331	2.78139	3.23694	3.47394	4.9349	7.74318	10.2142	2.82556	1.94185	2.79155	3.50256	4.00866	4.67367
C6	C6A	5.88329	5.02157	5.8661	5.20764	3.19496	3.89599	2.54637	6.06539	3.76086	7.46381	4.10638	3.80201	4.39217	3.59246	6.53186	7.76069	2.74412	3.37764	7.23111	7.79762	9.97358	9.66596	13.6493	11.9223	3.66777	8.39228	2.72529	6.66784	8.4794	0.783951	0.831244	5.97134	6.60073	7.05285	7.75508	1.12157	3.64413	3.7307	3.7955	5.44256	7.75443	8.91337	2.04948	2.98939	3.02196	2.77409	3.17778	5.03532
C6	C6A	5.66969	5.00752	5.85939	5.0145	3.31408	3.59049	2.70656	5.80584	5.13973	5.98812	4.46069	4.03107	4.36379	4.43666	6.66509	6.85041	4.06802	4.38172	7.30471	7.34823	9.77015	9.11691	13.3831	11.783	3.49692	6.63651	1.93151	5.75487	7.82286	1.18206	1.2207	6.14609	6.42786	7.82557	8.02049	1.6509	2.19007	2.6325	3.72221	3.86361	7.95933	8.29929	3.16405	2.06779	2.05245	3.40277	5.2148	3.04411
C6	C6A	5.17384	5.20058	5.42943	4.50016	3.20435	3.1009	2.94066	5.41442	4.64868	6.47563	3.96503	3.53731	4.39583	4.5202	6.56105	6.63022	4.03272	4.03705	6.83162	7.73525	8.4671	9.82759	11.5817	11.6428	2.21151	7.86705	2.53304	6.31483	7.63114	1.64127	0.401149	6.10728	7.00793	7.79037	8.02555	1.31653	2.25392	3.76559	3.19885	4.36935	7.69321	9.30249	2.7163	2.4691	4.20895	2.04831	4.23084	4.82752
C6	C6A	6.21896	4.74256	5.95984	5.60718	2.4587	3.35662	3.83424	6.68342	3.71593	7.78576	3.35633	4.05809	3.932	3.56455	7.29124	8.16553	4.25796	3.79782	7.31278	8.35491	9.36783	10.0966	12.9486	11.5211	2.78051	8.0597	1.90505	6.91253	8.90786	1.97546	1.10049	5.26873	6.69612	8.19671	8.41297	1.1103	2.38159	2.98571	3.01652	5.00909	7.38425	9.83098	2.5436	2.12861	2.63274	3.58655	4.10807	4.23795
C6	C6A	6.62029	4.72673	6.51467	5.93114	2.80001	3.57646	3.69473	6.90981	3.72052	8.01248	4.36756	3.66706	4.17094	3.53002	7.33527	8.41328	4.30708	3.76978	7.73085	8.4759	10.5988	9.98651	14.6122	12.1417	4.17254	8.45451	2.19079	7.08187	10.2907	1.3831	1.06975	5.71139	6.65349	7.8285	8.64626	1.68066	2.68558	3.49821	3.59391	5.20542	7.89971	9.6	3.30402	1.6679	2.8043	3.23988	5.12168	4.23535
C6	C6B	5.9767	4.09441	6.09562	5.19246	2.4172	3.08043	3.35529	6.19664	3.83336	6.73166	3.87028	4.09718	3.66632	3.71974	6.81326	7.09579	5.19789	4.05434	7.00937	8.01759	10.8422	9.33171	12.2729	11.2015	3.20866	8.09972	1.96014	6.70646	8.95133	1.31716	1.13141	5.45862	6.39963	7.01172	7.65466	2.52137	2.59325	2.59046	3.52226	4.39779	7.67244	9.49448	1.86417	2.97185	2.8533	3.15243	5.77911	3.76693
C6	C6B	6.05211	4.40877	6.42645	5.42311	2.83027	3.39418	3.48466	6.3724	4.12557	7.28307	4.35776	4.06812	3.94787	3.71551	7.03994	7.90844	3.80503	3.76257	7.16276	8.17891	10.4223	9.58823	13.3801	11.8177	3.70977	7.82344	2.05703	6.6925	9.32229	1.03785	1.17596	5.53008	6.68022	7.51459	8.21857	2.42551	2.48797	3.05869	3.62486	4.71419	7.36647	9.4692	2.71286	2.01691	2.84071	3.23743	5.09749	3.48249
C6	C6B	5.90967	5.28292	5.67683	5.223	3.00872	3.79449	2.88309	6.04657	3.5307	7.68294	3.5331	3.26757	4.3685	3.324	6.69211	8.03199	3.28203	3.63965	7.25324	7.7644	9.64283	9.6043	13.3137	11.7926	3.10733	8.2242	2.67487	6.72518	8.42983	1.21735	0.869698	5.90875	6.43891	7.76265	8.34165	1.18702	3.34784	3.59553	3.39295	5.40521	7.79804	8.79188	2.2316	2.83464	3.29348	2.42571	3.19854	5.477
C6	C6B	5.59369	4.15785	6.54938	4.90482	2.98222	3.5555	2.8509	5.6482	5.30349	5.50807	4.01521	4.18314	3.82257	4.36188	6.96239	6.78012	3.74764	4.58169	7.20313	7.17354	9.79097	8.72201	13.2482	11.4404	4.12176	6.85609	1.58334	5.95862	8.32567	0.728274	1.741	5.999	6.08573	7.57994	7.88801	2.5729	2.64962	2.18378	4.29415	3.32531	7.965	8.03612	3.08432	2.1492	1.72892	3.55124	4.82568	3.19823
C6	C6B	5.17799	5.77435	4.38411	4.63125	3.02393	3.07344	2.98846	5.86435	4.11667	7.38832	3.63454	3.82886	4.31588	4.1497	6.30883	7.35635	4.05424	3.54976	6.60531	8.30435	8.52354	9.68248	11.1084	11.9099	1.08594	7.91419	2.89894	6.77032	7.39057	2.31249	0.0814927	5.51965	7.61188	7.3762	8.33732	0.906555	2.39306	3.77519	2.20441	5.32189	7.02659	10.4912	3.34357	1.31089	3.21616	3.73782	3.88527	4.97756
C6	C6B	6.30527	4.58769	5.85678	5.6332	2.41811	3.70335	3.20976	6.67066	4.0687	6.98103	3.41433	3.9964	3.64878	3.70266	7.15201	7.62715	4.03553	3.93713	7.16058	8.37193	9.2133	9.9019	12.6935	12.2339	2.69905	7.7315	2.3375	6.40775	8.00233	1.75057	1.29548	5.16909	6.51238	8.04013	8.32632	1.8546	2.0403	2.63822	3.27362	4.65229	7.25615	9.76835	2.93238	1.59427	2.60324	3.48801	4.35002	3.74384
C6	C6B	5.66059	4.72507	6.7408	4.96547	2.91085	3.31009	3.83692	5.58243	3.80808	7.49946	4.20616	3.44028	4.20936	3.43145	7.47048	7.95032	3.72705	3.42924	7.40797	7.17178	9.27866	9.58421	12.4776	11.7609	2.84761	8.08383	2.73667	6.70639	8.70085	1.25083	0.733109	6.22406	5.93384	8.22365	8.40641	1.5451	2.73451	3.09126	3.84346	4.44835	8.21526	7.7258	3.03768	2.46241	2.58655	2.5859	4.35107	4.18749
C6	C6B	4.85475	4.42043	6.66837	4.4672	2.61476	3.40836	4.18045	5.0237	3.561	7.91369	2.80085	2.82235	3.55985	3.27856	7.77481	8.31723	3.32736	3.6932	6.26997	6.8489	7.99038	9.53175	11.4097	11.3476	2.47838	8.1359	2.9681	6.29611	7.88511	1.49684	0.836882	5.09395	5.83782	8.6789	8.86995	0.99701	2.88206	3.68813	3.27531	4.59868	6.30047	7.48979	2.29002	2.10338	2.82847	2.38484	2.95852	5.39054
C7	C7	5.51339	5.36695	5.82522	4.84507	4.04995	2.96007	2.82547	5.53776	6.27107	4.97057	3.82551	4.95384	5.19775	5.83658	6.02135	6.02986	3.92271	5.51813	7.20302	7.29618	9.99071	8.9046	11.9759	13.1229	2.12754	7.50338	2.73848	5.24394	6.51083	0.428666	2.04311	6.69948	6.78881	7.64675	7.75899	1.70905	3.66942	2.35313	3.60233	2.85049	7.9611	8.13704	1.99698	3.33806	1.94243	3.5093	3.65522	3.57426
C7	C7	4.95153	5.21154	5.56564	4.37678	4.44434	2.51899	2.56288	4.95204	6.11986	4.65843	3.44594	4.4975	5.01601	5.82378	5.78689	5.16344	4.30309	5.36182	6.66695	6.68478	9.20496	8.79767	11.4942	12.5299	2.21961	7.23183	2.78138	4.84873	6.07582	0.426421	1.13489	6.71655	6.72415	7.71363	7.50436	2.82335	3.226	2.35522	3.50967	2.67838	7.3446	7.36931	2.03353	2.99991	2.06855	2.98134	3.88019	3.44263
C7	C7	4.03982	4.54669	5.21873	3.72112	2.72077	3.04745	3.2268	4.30407	3.64329	6.76089	3.11868	3.40015	3.70727	3.42621	6.41652	7.00173	3.72129	3.55867	5.00038	6.81615	7.50945	8.54297	9.80321	10.7087	1.80307	6.79699	2.83075	5.54202	6.80195	1.66916	0.40431	4.4977	6.11086	7.20385	7.72203	1.20024	2.16756	3.02879	2.48552	4.3897	4.92189	7.87983	1.70394	1.77982	2.29235	3.28162	3.64148	3.60535
C7	C7	4.77936	4.87444	5.93347	4.10491	3.46411	2.76294	3.0557	4.71092	5.36073	5.29243	5.02543	4.21327	4.71794	4.77929	6.22855	6.16667	4.68109	4.29007	7.08942	6.45876	10.2205	9.03126	11.395	10.9412	2.63079	6.92221	1.90725	5.65916	7.59367	0.891268	1.4533	6.62154	6.18493	6.48604	6.81116	2.76246	3.39464	3.38351	3.7075	2.98082	8.22956	7.29964	3.4929	2.21601	2.05446	3.0071	5.59436	3.56211
C7	C7	4.09343	5.58518	6.21493	3.60768	4.16145	2.95344	3.28497	4.00808	5.39967	6.15441	4.34923	3.83859	5.16569	5.00799	6.69691	6.66053	3.59162	3.99992	6.56153	6.27105	9.8968	8.59394	11.45	11.5	2.47113	7.45089	2.67341	5.61868	7.04198	0.755182	0.927218	6.92364	6.56429	7.47086	7.90703	1.47782	4.84223	3.89997	3.64699	3.52055	7.41504	6.87586	3.65443	1.85084	2.41374	2.69248	3.01953	5.81278
C7	C7	4.32001	4.41016	6.16217	4.1065	2.86946	2.51506	4.66529	4.87064	4.08131	7.83856	2.93	4.41997	3.78601	3.96217	7.25769	8.00935	3.88978	3.02963	5.36438	7.47296	7.22182	9.52483	10.3188	10.4716	1.923	7.44401	1.94704	6.1762	7.69545	1.77511	0.544567	4.42565	6.94636	8.25491	8.29493	0.916811	2.17781	3.25218	2.30236	4.5922	4.79409	8.86329	1.74557	1.65863	2.51689	3.77536	3.42045	3.58395
C7	C7	4.84962	4.03711	6.64935	4.44335	3.00883	3.38861	3.39378	4.94815	4.41829	6.48529	3.58795	4.12917	3.71011	3.90621	7.02985	7.24121	3.46919	3.54819	6.31848	6.38911	9.3458	8.9464	11.8922	11.4693	3.30639	7.44363	2.72491	5.52719	7.66319	0.624507	1.29193	5.31656	5.581	7.47493	7.41813	2.05361	3.13686	2.89271	3.82802	3.71117	6.43682	6.7698	2.15348	2.27409	2.23077	2.42596	4.06398	3.26728
C7	C7	5.28198	4.26637	6.79731	4.68466	3.03646	2.84283	3.93324	5.19297	4.82987	6.04736	4.38948	4.26245	3.98376	3.98156	7.13512	7.19857	3.52528	3.59574	6.90808	6.65532	10.3651	8.97774	11.5296	11.0142	2.54855	6.72478	1.60705	5.77787	7.26056	0.618416	1.61718	5.93116	5.60335	6.9825	7.19627	1.73888	3.72532	3.13063	3.76728	3.02887	7.51692	6.96805	2.89353	2.1951	2.13439	2.58399	4.31253	3.50502
C8	C8A	4.96022	4.01381	5.09536	4.45733	2.86636	2.46867	2.8506	5.30467	4.77728	4.96444	2.97688	4.05839	3.71212	4.46987	5.69353	5.45112	3.4962	4.00125	5.94652	6.95762	7.53478	8.15541	10.2201	10.6825	2.03493	6.24897	1.83184	4.94412	6.36566	1.24092	1.0184	4.89764	6.03189	6.90914	6.95291	1.86047	1.94794	2.05055	2.81492	3.01054	6.11257	8.21854	1.935	2.04568	1.41274	3.92122	3.32779	2.84665
C8	C8A	4.11233	4.50497	5.22227	3.73019	3.70597	2.76033	2.35703	4.19748	5.60161	4.32706	2.90112	3.39416	4.11991	5.1406	5.72614	5.00489	3.6809	4.43826	5.44287	5.98908	7.39922	7.44343	10.5682	10.8951	2.59261	5.91944	2.03929	4.2775	5.77084	0.878572	1.18763	5.48372	5.91286	7.324	7.30638	1.60971	2.3852	2.40702	3.22346	2.50047	5.69546	6.61089	1.91399	2.09019	1.73787	2.90894	3.2923	3.36795
C8	C8A	5.09373	4.99313	5.10883	4.56685	3.16941	2.96909	2.91854	5.24408	4.49389	5.90625	3.44722	3.82842	4.37716	4.24816	6.04331	6.34168	4.00958	4.02483	6.24466	7.01929	7.63715	8.90591	11.4265	11.3755	2.24927	6.88582	2.45873	5.19882	6.80545	1.49401	1.04139	5.40854	6.09623	7.68434	7.55452	1.78921	1.93328	2.48622	2.77097	3.69543	6.51696	7.90969	2.29256	2.05139	2.30083	2.95775	3.67915	3.05561
C8	C8A	4.56594	3.8402	5.47433	3.8847	3.31462	2.71907	1.89109	4.26147	5.20136	3.49203	3.20175	3.27883	3.52289	4.59726	5.87245	4.50038	3.08093	4.28516	6.24893	5.27861	8.02263	7.27435	10.3905	10.4394	2.68823	6.13872	1.84189	4.55736	5.59243	0.699487	1.56338	5.91143	4.87438	6.47906	6.05465	1.75285	2.95467	2.15452	3.99109	1.93151	7.29409	5.32584	2.56419	2.33114	1.74984	1.82746	3.26338	3.22523
C8	C8A	4.37277	4.44017	5.3856	3.77709	2.81416	2.44158	3.2315	4.15967	3.94864	5.39827	3.82585	3.18108	3.64667	3.8271	6.43363	5.64796	2.92959	3.45176	6.12093	5.53912	7.82106	7.35501	9.75274	9.68723	1.71583	6.79277	2.22055	4.98251	5.82332	1.44234	0.786991	5.64133	4.87365	6.85084	6.76905	1.51592	2.35689	2.33272	3.03186	2.84055	7.0205	5.79485	2.95643	1.90225	2.0137	1.999	3.61326	2.91648
C8	C8A	5.08948	3.06036	6.76088	4.4909	2.62595	2.2389	3.80129	5.13394	4.488	5.41903	3.59447	3.41363	2.90449	4.07236	6.94557	6.17369	3.25079	3.77088	6.57729	6.44207	8.56756	7.75067	10.5518	9.85134	2.64071	6.81675	1.14234	5.93684	7.37455	0.385717	1.4202	5.38963	5.39958	7.45666	7.51259	2.3779	1.92337	2.0418	3.89231	2.73976	7.20141	7.10768	3.06925	1.67664	1.7448	2.94281	4.77657	2.94128
C8	C8A	4.42933	3.76021	5.37472	3.90715	2.75253	2.627	2.67846	4.33806	3.72676	5.21993	3.4138	3.83808	3.36884	3.55935	5.85202	5.49566	2.99462	3.21625	5.6905	5.6315	7.64251	7.79666	10.0215	10.0948	2.43566	6.94995	2.64772	4.80183	6.23461	0.751107	0.720469	5.04692	4.82502	6.39004	6.1691	1.74871	2.24724	2.02918	3.23725	3.06776	6.22464	5.9417	2.05805	2.1361	1.98235	2.02283	3.69643	1.98478
C8	C8A	5.14991	4.77964	4.89075	4.53489	2.67393	2.43476	3.40683	5.06357	3.35606	6.15221	3.62818	3.31334	4.4181	2.89114	5.55022	6.9157	3.89799	3.53965	6.30657	6.34169	7.63228	8.44686	10.2015	10.3335	1.3083	6.29086	2.26994	5.19814	6.27337	1.31203	1.28152	5.22962	5.08234	7.07499	7.07499	1.31379	1.95653	2.12533	2.43818	3.49441	6.82478	6.68735	3.2752	1.1795	1.84447	2.51908	3.68097	2.61985
C8	C8B	3.86756	4.4056	5.24784	3.50897	3.67583	2.6896	2.39295	3.92136	5.38133	4.40639	2.76738	3.34691	4.08233	4.90623	5.66034	5.03334	3.72105	4.17783	5.23647	5.7419	7.26853	7.26347	10.1352	10.6786	2.47211	5.91852	2.15513	4.25509	5.72483	0.74956	1.02638	5.42429	5.76636	7.33532	7.26883	1.97867	2.39022	2.27008	3.2146	2.53166	5.51436	6.29642	1.87967	2.05971	1.85151	2.64579	3.29983	3.29649
C8	C8B	4.21076	3.71134	5.72962	3.72264	2.86976	2.4564	3.02037	4.16004	4.16609	5.16113	2.94619	2.67106	3.53335	3.55023	5.93754	5.88233	2.90082	3.3292	5.75682	5.60046	8.11088	7.4122	9.90734	9.48622	2.46394	5.87937	1.68157	5.00139	6.54862	0.413606	0.963248	5.25537	5.06431	6.63835	6.81999	1.17784	3.22582	3.03127	3.36516	2.80804	6.35911	6.041	1.97652	2.42204	1.81406	2.36544	2.90747	4.73523
C8	C8B	5.06975	4.81879	4.95826	4.56963	3.01361	2.96703	2.83192	5.32353	4.3614	5.90507	3.27188	3.89517	4.16547	4.10242	5.95136	6.3141	3.89005	3.85098	6.18741	7.02052	7.5734	8.86474	11.2754	11.1466	2.20361	6.71657	2.35441	5.21152	6.77478	1.53729	0.928704	5.17522	6.0918	7.50941	7.43284	1.78094	1.88196	2.35424	2.68981	3.77649	6.36742	8.06089	2.32001	1.87367	2.36521	2.94442	3.57109	2.99401
C8	C8B	3.74644	4.14114	5.66473	3.43482	2.59971	3.37097	3.01956	3.88671	3.70952	6.46349	3.59806	3.85488	3.41259	3.21864	6.50008	7.11829	3.09301	3.13488	5.19059	5.89003	7.7116	7.89494	10.1258	9.96664	2.55593	6.69524	2.59508	5.31215	6.72977	1.05468	1.04026	4.6897	5.43525	6.83413	7.03066	1.8594	2.4952	2.6462	3.13309	4.05392	5.38752	6.60377	1.76895	2.12926	1.83	2.94855	3.92262	2.65643
C8	C8B	5.98771	3.51791	6.57427	5.16047	2.80695	2.32654	3.56439	5.88998	4.88309	5.04439	3.74104	3.8368	3.47611	4.4457	6.61746	6.08931	3.43174	4.04018	7.21013	7.09488	9.30356	8.41692	11.4214	10.6508	2.6362	6.64034	0.944594	5.89943	7.20512	0.0902046	1.91027	5.80685	5.57878	7.21686	7.23232	3.633	2.43502	2.0743	3.92339	2.59799	8.0725	7.70851	3.07986	1.98738	1.80059	3.03825	4.66173	3.08211
C8	C8B	4.0462	4.42032	4.32559	3.54514	3.47323	1.84527	2.34438	3.94748	4.49226	4.04028	2.85954	2.33172	4.14797	4.34631	4.70416	4.25504	3.46011	4.27992	5.6953	4.99333	7.05796	6.43416	9.22376	9.59974	1.51353	5.66124	2.16114	3.86867	4.86222	0.757315	0.571945	5.5334	5.05027	6.5878	6.71464	1.38583	2.23657	1.97005	2.57948	2.15328	6.40981	5.25516	2.60001	1.78242	1.62858	1.96865	2.99942	3.41071
C8	C8B	4.55066	3.70854	5.47786	4.0164	2.63821	2.80059	2.66909	4.48231	3.83441	5.21401	3.46339	3.81568	3.22749	3.63847	6.08797	5.56356	2.97859	3.21091	5.78981	5.78779	7.64572	7.89053	10.2019	10.2211	2.52976	6.97512	2.56801	4.89412	6.30883	0.926874	0.867606	5.0043	4.86328	6.51072	6.31443	1.71045	2.11889	1.98356	3.34016	3.0864	6.31045	6.15816	2.07099	2.163	2.02025	2.11225	3.78663	1.99214
C8	C8B	5.00084	4.99496	4.63734	4.54152	3.37494	2.53884	2.8338	5.05619	4.058	5.68093	3.09718	3.03667	4.45207	3.84044	5.44016	5.93886	4.12245	3.40388	5.95632	6.36671	8.45356	8.8042	10.9296	11.0892	1.80135	6.0215	2.55921	4.52889	5.94255	1.31388	0.496454	5.20401	5.50969	6.74226	6.8488	1.2666	2.9369	3.3261	2.34993	3.40301	5.94883	6.68584	1.46003	2.46135	2.98644	1.41464	3.21537	4.24413
C9		6.12648	4.15229	5.69018	5.47861	3.04425	3.05724	2.70015	6.44804	4.44742	5.91165	2.85177	2.67655	3.62332	4.30559	6.39348	6.0779	3.77891	3.99668	7.10059	7.65858	8.83384	9.05892	12.3319	12.3179	2.80811	7.51537	2.66818	5.66512	7.37992	1.09882	0.383845	5.39214	6.21483	7.80617	8.14226	1.51897	2.24708	3.29913	3.50698	3.87088	7.25954	8.75226	1.87972	2.5989	3.29847	2.09602	3.71274	4.93516
C9		5.81317	4.50218	4.89058	5.1526	2.74266	2.91521	2.66755	6.32903	3.96198	6.26428	3.85044	4.52543	3.77064	3.89483	5.89612	6.38006	4.14225	3.75541	6.79512	7.80119	9.13442	10.1261	11.6735	11.4007	2.25734	7.6197	2.41621	5.95155	7.36871	1.43105	0.493933	5.16999	6.51081	6.55061	6.59206	1.35533	2.11011	2.7186	2.82493	4.36267	7.12164	9.53285	2.89709	1.50261	2.61362	3.27739	4.78723	2.85788
C9		5.91429	4.50584	6.59805	5.15903	3.22116	3.4531	3.01164	5.71223	6.15302	4.57151	3.76459	3.94617	4.19722	5.04925	7.04128	6.49382	4.04269	5.12438	7.50398	6.90169	11.2018	8.42992	13.3107	11.9449	3.76366	6.27061	1.10172	5.43791	7.51764	0.925818	2.6331	6.32051	5.61211	7.43618	7.63245	2.82425	4.18473	2.52239	4.23831	2.25482	8.34117	7.03687	2.67322	2.77016	2.16598	2.42652	3.78005	4.38075
C9	C9	4.77915	3.96001	5.37297	4.42705	2.77636	2.79106	3.07795	4.98339	3.62709	6.10473	3.21458	3.10404	3.26447	3.53915	6.23725	6.19733	3.26259	3.10404	5.68462	6.25478	8.00815	8.85537	10.5801	10.5765	2.24935	6.31811	2.48033	4.84784	6.26823	1.16825	0.17098	4.4977	5.24171	6.5708	6.78459	0.978457	2.47666	3.27219	2.78424	3.64575	5.36653	6.70674	2.1526	1.39678	1.813	2.62256	3.60412	3.52331
C9	C9	4.76959	4.02174	5.37435	4.2445	2.61736	2.48626	3.25805	4.95853	3.85233	5.91599	3.20155	3.33143	3.30183	3.74509	6.30816	6.07393	3.06325	3.43604	6.12355	6.50027	8.23927	8.4652	10.1737	9.91029	1.938	6.91685	1.92924	5.51795	6.54334	1.28598	0.503365	5.07215	5.63708	6.61128	6.88635	0.977108	2.73225	2.89143	2.91524	3.52389	6.59006	7.48718	2.37718	1.99484	2.59083	2.37832	3.27251	4.0765
C9	C9	5.24262	4.65471	5.48101	4.68454	2.36859	3.21042	3.47776	5.39539	3.86403	6.56707	3.54228	3.90191	4.13569	3.28242	6.42757	7.73182	4.23249	3.84332	6.56211	6.94754	8.30703	8.70701	11.2602	10.7146	2.16608	6.77582	2.06748	5.77528	7.42349	1.64604	1.88486	5.14945	5.6718	6.99252	6.94152	1.20128	3.00073	3.23759	2.85082	3.93557	6.94908	7.80752	2.32038	2.26057	2.15716	2.9895	3.7553	4.01753
C9	C9	4.69865	5.08139	4.25897	4.14722	3.24294	2.63923	2.36201	4.97416	3.61441	6.27363	3.6007	3.84988	4.51565	3.5263	5.03224	6.36884	4.1163	3.73341	6.11161	6.77829	8.28893	9.01411	10.975	10.314	2.14208	6.66947	2.40641	5.6609	7.28539	1.19705	0.20207	5.49057	6.31627	6.44883	6.72522	1.58301	2.40535	2.7374	2.4568	4.48325	6.69811	8.10824	2.46264	1.99388	2.07337	3.32284	3.99192	3.44188
C9	C9	4.08433	5.94045	5.18583	3.70481	3.52782	3.82154	2.74304	4.18845	5.43373	5.97618	3.48506	4.30996	4.91259	4.97057	6.61453	6.89913	4.4621	4.65171	5.90557	6.55532	7.70932	8.85341	11.8918	11.4124	2.60357	6.68046	2.5393	5.00518	6.74343	1.94985	1.77065	5.83167	6.4196	8.29542	8.11743	1.15839	2.671	2.68625	2.92197	3.78609	6.31848	7.36204	1.87414	2.74852	2.87563	2.51565	3.62358	3.40905
C9	C9	5.99618	3.68802	6.18783	5.04344	2.88204	2.54519	2.87944	5.75898	4.50779	4.97739	3.96202	3.76331	3.50748	4.15744	6.41228	5.5775	3.86383	3.77414	7.30649	6.84917	9.49808	8.82683	11.6908	10.9222	2.93969	7.11589	1.70013	5.81166	7.49574	0.492123	1.19046	6.04986	5.42955	6.80338	6.6215	1.96177	2.46728	2.23656	4.06555	2.832	8.52986	7.41442	3.0214	2.28634	1.91892	2.69452	5.02309	3.06304
C9	C9	4.80064	4.33032	4.94853	4.09127	3.07018	2.28364	2.55393	4.70425	3.82462	5.26792	3.21524	2.39978	4.03859	3.78048	5.39233	5.31441	3.96322	3.94943	6.39538	6.02801	8.07614	8.33738	10.0862	10.3672	1.92047	6.96324	2.61802	5.20201	6.56226	0.916324	0.111606	5.76469	5.41744	6.62329	6.96225	0.754072	2.66412	2.90375	3.0882	3.28708	7.42716	6.74911	2.71799	2.1783	2.46353	1.98478	3.69633	4.6444
C9	C9	5.35571	4.13588	5.29724	4.75958	2.62162	2.93571	2.82581	5.46059	3.00654	6.6113	3.16745	2.62323	3.47158	3.08295	6.15298	6.53679	3.47291	2.75375	6.44298	6.68691	8.68573	8.55605	10.787	11.2094	2.01284	7.04054	3.15932	5.76683	7.05712	1.20753	0.116624	5.06419	5.38763	6.76445	7.25011	1.56316	2.55718	3.12395	3.07549	4.37063	6.79825	7.3736	2.5646	1.7725	2.9413	1.76565	3.65779	4.42777
C10	C10A	5.04433	5.10601	5.76965	4.42129	3.15514	2.87161	3.50563	5.08415	4.23946	6.72206	4.48612	3.75066	4.59995	3.83481	6.46956	7.29492	4.64454	3.81162	6.84173	6.99961	8.70189	8.59993	11.5245	10.9401	2.25235	7.30879	2.1937	6.14727	7.72068	1.18999	1.04974	6.1073	6.27024	8.06733	8.26035	2.09128	1.83217	2.4996	3.17835	4.06381	7.64973	7.93664	2.4985	2.7275	2.03949	3.38346	5.38139	2.99845
C10	C10A	4.27892	4.0106	6.9206	3.81646	3.37074	2.69429	3.68476	4.30049	5.48746	5.49884	3.8265	4.17452	3.84037	4.78312	7.12027	6.53571	3.11354	4.29658	6.23373	6.35206	8.05455	8.08257	10.3653	10.8689	2.39678	7.17661	1.8529	5.80952	7.12731	0.427215	1.61616	5.97741	6.08847	8.02819	7.95262	1.53591	2.47472	2.34929	3.99486	2.80558	6.86378	7.05985	3.16413	1.7688	1.87098	3.20465	4.07381	2.96663
C10	C10A	4.63389	2.90452	6.60398	4.05089	3.23761	2.74925	2.32535	4.73555	4.70178	5.01531	3.86483	4.38737	2.94768	4.55928	6.56151	5.18246	2.73656	4.00379	6.12146	6.48229	9.31492	8.44059	11.0142	10.8165	3.70241	7.96204	2.4054	5.99088	7.45852	0.0681052	0.379033	5.62989	5.99388	5.91938	6.14166	1.56946	3.24334	2.66172	4.70503	3.2612	6.83958	7.51339	2.24779	2.35077	1.68086	3.37191	4.10035	3.16299
C10	C10A	3.89878	5.49324	5.68253	3.58289	3.81438	2.3767	4.07918	4.17756	5.43067	6.5442	3.92363	4.29028	5.01028	5.17134	6.46273	7.1162	4.49791	4.79155	5.69824	7.10355	8.52089	9.04316	10.5429	10.4865	1.76093	6.76022	1.67137	5.61956	6.95766	1.44161	1.42866	5.83682	7.234	7.88498	8.3748	1.0187	2.87679	3.39447	2.5217	3.69171	5.96827	8.28203	2.44901	1.97652	2.43481	3.71076	4.27485	3.92363
C10	C10A	4.50441	5.27424	5.03347	4.13845	3.48924	2.4523	3.52873	4.80781	4.0762	6.9258	2.98103	3.54018	4.60095	3.90587	5.9291	7.18384	4.07867	3.68546	5.66448	7.12936	7.60454	8.60517	10.6984	10.8975	1.61216	7.12618	2.45068	5.67452	6.88505	1.33308	0.702193	5.29461	6.67552	7.89766	8.28631	1.3165	2.31267	2.98649	2.22425	4.32754	5.64778	8.25346	1.99083	1.94014	2.36479	3.37886	3.28661	4.07735
C10	C10A	4.27463	5.03695	6.31291	3.80672	4.35712	2.56282	3.18756	4.25973	6.59886	4.71147	3.04218	4.0544	4.88339	6.07554	6.5757	5.65529	4.30607	5.29151	6.41476	6.34453	8.54139	8.04457	11.3307	11.5217	2.8135	6.67171	1.7415	5.18204	7.07575	0.809758	1.71628	6.75592	6.68928	8.62115	8.28134	1.93763	3.45917	2.49444	3.76473	2.34874	7.1077	6.98723	2.2757	2.88819	1.88199	3.19444	3.328	4.37554
C10	C10A	5.33814	4.97725	5.00506	4.50383	2.70727	2.75591	2.95897	5.31243	3.77686	6.15738	3.97363	4.64218	4.69281	3.56722	5.81503	6.53003	4.74588	3.28885	6.89739	7.03482	9.01672	9.35455	11.1588	10.5336	2.21663	7.31526	2.16265	6.03597	7.81622	1.72934	0.918277	5.95092	5.97712	6.4803	6.20923	1.88613	3.06445	2.70263	2.94148	3.9977	8.09007	8.22204	2.65749	2.6145	2.11895	3.24539	4.19438	3.37798
C10	C10A	4.6371	4.55506	6.17937	4.13332	3.87801	2.86356	2.82667	4.75323	5.84392	5.15933	3.49174	3.82989	4.32639	5.54203	6.43948	5.77327	3.68274	4.76748	6.25892	6.96127	8.50813	8.62501	11.3794	11.9761	2.83362	7.6242	2.55631	5.44674	6.97089	0.472923	1.39752	6.16901	6.73272	7.70915	7.82217	1.60686	2.94322	3.10839	3.85323	3.06995	6.80283	7.94918	2.75428	1.99639	2.18882	3.36256	3.79161	4.32949
C10	C10B	5.17957	5.07623	5.74863	4.51335	3.04676	2.96557	3.42018	5.18659	4.12079	6.71875	4.42288	3.62654	4.54816	3.70026	6.5064	7.29433	4.51155	3.70452	6.89079	7.07261	8.65612	8.66391	11.5644	11.0601	2.26873	7.34147	2.28226	6.1882	7.77645	1.28678	1.01373	6.08175	6.19053	8.17341	8.25816	2.21847	1.68005	2.51515	3.21515	4.12525	7.74849	8.00111	2.51785	2.723	2.11917	3.29257	5.23296	3.09986
C10	C10B	5.28047	4.22366	5.22901	4.59431	3.26036	2.01879	2.94521	5.42157	3.74637	5.95888	4.54761	4.81542	4.03115	3.76218	5.45574	5.94348	3.0411	2.61349	6.36427	7.09932	9.32512	9.47368	10.931	10.4543	2.42363	7.07699	2.01778	5.76639	7.48879	0.45095	0.0461757	5.60765	6.1841	5.30095	5.47116	1.27202	3.30135	3.27094	2.98725	3.85028	7.00974	8.29303	2.57163	1.92736	1.50682	3.82122	4.05255	2.65384
C10	C10B	4.30433	4.91903	5.23918	3.91412	3.02654	3.35309	2.85768	4.54239	4.47375	6.24628	3.10784	3.87502	3.82568	4.25471	6.59801	6.54977	3.51516	3.85182	5.84754	6.60706	7.61936	8.09348	11.2633	10.4206	2.56837	6.73008	2.13759	5.38571	6.83514	1.69048	0.711811	5.24397	6.17713	7.79114	7.93608	1.4112	2.30027	2.35722	2.9154	4.0325	6.13563	7.62824	2.3487	1.96156	1.95318	3.40537	3.44628	3.44517
C10	C10B	3.65896	5.64113	4.83106	3.29621	4.37485	2.32481	2.73432	3.78143	5.78695	5.03576	3.21525	4.06997	5.22247	5.60929	5.34352	5.35707	4.52442	5.0361	5.55439	6.30938	7.9031	7.97047	10.5238	10.7016	1.97703	6.29722	2.18921	4.56552	5.83919	0.842928	0.918436	6.28774	6.89877	7.53757	7.66447	1.37702	3.12177	2.66788	2.63593	2.98521	6.05915	7.23318	2.19743	2.29283	2.14026	3.2206	3.44791	3.98695
C10	C10B	3.63746	4.28982	6.42791	3.30056	3.54354	2.71465	3.46685	3.7373	5.19298	5.81892	3.60226	4.20171	4.00274	4.66423	6.73579	6.50706	3.12962	3.2458	5.35008	6.38785	7.39757	8.6827	10.4663	9.999	2.88768	6.512	1.56192	5.48136	6.82253	0.440882	1.11615	5.62436	6.38536	7.49631	7.31094	1.82105	2.97498	3.42756	3.53366	3.2712	5.74209	7.22445	2.25526	2.03336	1.74568	3.65971	3.48192	3.81719
C10	C10B	3.87096	3.62663	5.96436	3.34223	2.77139	1.85513	3.65445	3.94514	4.04179	5.73301	3.41071	4.26375	3.47257	3.89837	6.20723	5.96412	3.42312	3.35564	5.80355	6.25594	7.38897	7.71536	8.7756	9.24853	1.73639	7.45735	1.84625	6.06265	7.26808	0.661509	0.670767	5.53766	5.92654	7.02289	6.77456	2.03181	2.25731	2.09067	3.33371	3.30262	6.69771	7.38465	2.28422	2.48778	1.75548	3.50949	3.99863	3.02236
C10	C10B	4.3234	4.69457	5.23756	3.69445	3.19012	2.52556	2.77157	4.5305	4.32779	6.08012	4.14319	4.74096	4.13369	4.18483	5.88134	6.24138	3.34989	3.69728	6.31829	7.09526	7.57879	8.71181	9.75675	10.7914	1.59963	7.7612	2.74222	6.25836	6.95068	0.878792	0.339493	6.05326	6.82958	6.95818	6.9752	1.02802	2.13749	2.34697	3.20368	4.14964	7.37125	8.67987	3.06495	2.07792	2.19065	3.86315	4.09438	2.96239
C11	C11A	4.50421	5.31698	4.54755	3.84239	3.17578	2.55643	2.68289	4.57494	4.48167	5.53778	3.96085	3.16478	5.06708	3.99138	5.26729	6.1548	4.88029	3.80114	6.24707	6.84395	7.384	7.88331	10.3024	10.1724	1.81268	6.15226	1.91047	5.43599	6.90808	1.61595	0.964862	5.96876	6.38199	7.32763	7.68432	1.05614	1.7284	2.88	2.61476	3.63468	7.27749	8.14815	3.11972	1.88006	2.79867	2.79533	4.30184	3.87082
C11	C11A	5.15842	4.25637	5.86044	4.41613	2.85994	3.23555	2.56554	4.99886	4.31319	5.49069	3.64238	2.66999	3.86181	3.84763	6.34316	6.17339	3.94986	3.68681	6.59507	6.61972	8.27334	8.16903	11.5401	10.9987	3.0539	7.1377	2.31398	5.60962	7.33977	0.789288	1.17281	5.83373	5.54152	7.59412	7.68179	1.78312	2.05689	2.82872	3.84752	3.492	7.56781	7.27766	3.05769	1.95857	2.48115	2.34042	4.48631	4.10537
C11	C11A	6.2023	4.20814	5.72939	5.34393	2.87538	2.67468	3.01216	6.30076	4.9566	5.13867	2.94172	3.31813	3.83955	4.60991	6.2365	5.92123	3.77401	4.49001	7.31368	7.59661	8.59751	8.49267	11.663	11.4616	2.29282	6.83978	1.60335	5.66014	6.92555	0.92702	1.6004	5.78808	6.09055	7.71739	7.82811	1.35167	2.63221	2.46644	3.47798	3.04689	8.14149	8.73719	2.61087	2.40202	1.81632	3.56736	3.41949	4.56928
C11	C11A	5.87851	5.59562	5.21976	5.2052	3.3528	2.97223	3.25158	6.08155	5.15199	6.03695	3.57347	4.30423	5.1839	4.95748	6.01118	6.90535	4.9449	4.62617	7.30278	7.71217	9.04048	8.85424	12.5251	11.9422	2.23382	6.95999	2.01438	5.57473	7.32177	1.56738	2.02832	6.07561	6.65284	8.33284	8.3159	1.42263	2.3093	2.20636	2.80451	3.6449	7.85429	8.83597	2.51087	2.57768	2.56632	3.15988	4.13397	3.48282
C11	C11A	5.34982	5.17923	4.70627	4.54621	3.3297	2.45998	2.61089	5.16586	5.03375	4.51181	4.29778	3.71059	4.69988	4.85536	5.74257	4.84106	3.95769	4.53959	6.97443	6.36527	8.36182	8.3324	10.6314	11.2308	1.37814	6.47185	2.30602	4.62371	5.49094	1.84896	0.888863	6.20983	5.6001	6.63355	6.80641	1.27225	2.37266	2.08054	2.85673	2.52444	8.10934	6.90858	3.27048	1.99134	2.25708	2.22618	3.9446	2.60673
C11	C11A	5.08214	4.81181	5.19606	3.92852	3.26601	2.28573	2.18439	4.46495	4.50836	4.28412	4.83196	3.43912	4.73138	4.15031	5.34382	4.75251	4.06552	3.68635	7.63632	5.59354	8.44695	7.05306	10.5894	9.9479	2.23977	6.59045	1.91535	5.3398	6.91421	0.591839	0.81223	7.20844	5.24515	6.63705	6.40078	2.09062	2.25934	1.69103	3.80434	2.55167	9.77344	6.10528	3.24025	3.24867	1.51489	2.53425	4.76214	2.75266
C11	C11A	5.18596	4.38873	5.23575	4.2749	2.75427	1.94599	3.2334	5.20979	4.19865	5.47007	4.17284	4.25067	3.89535	4.13113	5.84692	5.71909	3.38497	3.51933	6.99785	6.9149	8.08133	8.02236	9.68966	9.79968	1.22783	7.28909	1.6135	6.09343	6.61099	0.930149	0.944351	6.14012	6.14026	6.71996	6.77268	0.662818	2.09612	1.94951	3.17849	3.34674	8.47648	8.41322	3.62575	1.90201	2.02465	3.45684	4.23414	3.00188
C11	C11B	4.34987	5.00829	4.76049	3.60135	3.18857	1.77068	3.12854	4.41155	4.6936	5.2137	4.41393	4.03929	4.72434	4.5289	5.32192	5.46867	4.66	4.24923	6.33531	6.99239	7.26897	8.37866	8.74196	9.97648	0.663646	6.92553	1.89291	5.69297	6.13072	1.24713	0.700709	6.24412	6.65152	7.08887	7.23618	1.48661	1.50116	2.29398	2.72345	3.2844	7.6538	8.54351	4.1629	1.13581	2.17579	3.73563	4.81036	3.04187
C11	C11B	6.32329	4.99256	5.88139	4.89988	3.3134	2.8154	2.29736	5.58838	5.30281	4.30734	4.4469	4.74239	4.56004	5.06586	6.48118	5.0813	4.05434	5.035	8.58721	6.61493	9.91129	8.12038	11.8726	11.6494	2.27998	7.69415	2.20452	5.84232	6.75609	1.08153	1.70538	7.6926	5.63181	7.29184	6.96145	1.84919	3.31983	1.46486	4.37726	2.52076	11.0498	7.13244	3.46169	3.52572	1.33334	3.18332	4.45596	2.87402
C11	C11B	5.92362	4.98452	5.12318	4.95768	2.75669	2.90171	2.80108	5.69595	4.34251	5.37671	3.67291	3.05953	4.21221	3.95023	6.24958	5.95093	3.65074	4.10584	7.33033	6.98375	8.56619	8.11515	11.4271	10.9427	1.91882	6.51986	1.8215	5.46606	6.49372	1.64838	1.05195	6.13081	5.57222	7.67328	7.77216	1.46431	2.20012	2.15392	3.14946	3.26915	8.64217	7.72394	3.06654	2.38425	2.86311	2.01637	3.73816	3.88347
C11	C11B	6.0316	4.72227	5.36126	4.94114	3.02071	2.51312	2.7267	5.7666	4.88419	4.75633	4.52454	4.05535	4.58349	4.24957	5.58572	5.73874	3.88618	3.95058	7.58648	7.02702	8.97031	7.98543	11.5983	10.796	2.39245	6.31484	1.36066	5.5359	7.20416	0.681251	1.53747	6.51508	5.82508	7.03423	7.22317	2.01499	2.00961	1.5597	3.49193	2.80337	9.21583	7.96946	3.50719	2.26394	1.77022	3.21657	4.66521	2.56042
C11	C11B	5.57871	4.83258	4.72244	4.41991	2.37806	2.59417	2.59805	5.32208	4.64725	4.46823	4.38689	3.61312	4.43575	4.34257	5.61418	5.37354	3.92291	4.3311	7.24152	6.80329	8.21217	7.68367	10.2196	9.77009	1.53322	6.1089	1.1464	5.37081	6.24905	1.68646	1.7888	6.25895	5.64416	6.46642	6.64848	1.39797	2.06145	2.04464	3.08121	2.74516	9.14035	8.1369	3.00921	2.76176	2.22423	2.91669	4.23274	3.29669
C11	C11B	4.82024	4.7497	5.38699	4.05395	2.63018	2.54141	3.35362	4.88253	4.45424	5.81343	4.39733	5.07596	4.35836	4.2831	6.11212	6.46834	4.15165	3.58677	6.72452	7.11085	7.97606	7.67936	10.251	9.8652	1.77268	7.13658	1.46566	6.16205	7.336	1.41876	1.62566	6.03219	6.34919	7.43865	7.43267	1.13893	1.67123	1.41962	3.11385	3.5884	7.97329	8.5636	3.46224	1.95428	1.47138	4.35836	4.77062	2.02776
C11	C11B	5.54793	4.40534	6.33874	4.64396	3.12068	2.4949	3.37787	5.19549	4.3282	5.73334	4.13692	3.49159	4.15146	3.98513	6.64143	6.23453	3.73974	3.70738	7.39645	6.56026	8.73088	7.78521	11.591	10.6249	2.6214	7.27988	1.77829	6.04213	7.54932	0.573828	0.97727	6.60937	5.52925	8.01064	7.9003	2.46238	2.21002	1.76874	3.94182	3.13333	8.7926	6.96374	3.38648	2.41405	1.39503	3.20364	4.54675	3.15423
C12		6.87018	4.70862	4.58527	5.65871	2.84365	2.77233	2.03905	7.05488	5.13941	4.40432	4.00053	4.31507	4.41419	4.59739	5.12059	5.29696	3.89855	4.2207	7.75971	8.00371	9.15793	9.53214	11.7946	11.8217	1.98216	6.20417	1.7223	5.23618	6.48394	1.14332	1.4926	6.00111	6.35681	6.32491	6.23284	1.00223	2.2103	2.37529	3.13241	3.01954	9.20564	9.87341	3.54341	1.76125	2.78494	2.89247	4.03888	3.29434
C12		5.95194	3.47671	6.11755	4.62709	2.92655	2.60996	1.92215	5.65074	5.29386	3.81488	3.92126	4.14206	3.32168	4.67871	6.2937	4.64122	2.9675	3.98049	7.71647	6.87794	9.67456	8.54853	11.0747	10.6185	2.74435	7.15428	1.43233	6.25503	7.11997	0.346736	1.22141	6.75472	5.94657	5.97708	5.73196	1.63163	3.57165	2.44894	4.7969	2.47853	9.91962	8.33314	2.829	3.29494	2.4529	2.6911	3.92312	4.3385
C12	C12	6.02098	3.92278	6.01507	4.86118	2.25561	2.64399	3.12397	5.75163	4.15045	5.34283	3.05708	3.44673	3.66429	3.78905	6.47031	6.13369	3.50319	3.75083	7.47286	7.16501	8.56791	8.4101	10.8015	10.4683	2.12046	7.47912	1.60061	6.41529	7.66577	1.02785	1.53404	6.20479	5.63122	7.46807	7.23667	1.75843	3.17837	2.1482	3.90886	3.21854	9.2294	8.33909	3.03023	2.7192	2.16411	3.02921	3.25617	4.84054
C12	C12	6.61811	4.79492	4.91302	5.68648	2.4774	3.27871	2.58525	7.08388	4.26768	6.12348	3.92306	4.0733	3.90087	4.08308	6.18808	6.55394	3.00139	4.01209	7.35566	8.63661	9.21653	9.82401	12.2762	11.8719	2.23631	7.4	1.98213	6.20719	7.44528	1.74833	1.1545	5.43992	6.79321	6.59961	7.23641	1.04576	2.36338	3.01134	2.9537	4.37991	8.05539	10.7277	2.54634	2.24402	3.25195	3.12995	3.40949	3.99189
C12	C12	6.06905	3.63912	5.3538	5.31356	2.07388	3.08708	2.71249	6.57951	4.17669	5.57261	3.08038	4.19972	3.22564	4.17379	6.09802	6.17367	3.48003	3.94168	6.81794	7.88296	8.75832	8.95005	11.6877	10.9331	2.91143	7.16563	1.71262	5.87649	7.78144	1.32628	1.73518	4.7859	6.14266	6.52918	6.67713	2.20012	2.27607	2.34782	3.24265	3.75458	7.2048	9.7034	2.22814	2.07376	2.47383	3.31978	3.63891	3.50254
C12	C12	7.00631	3.20561	6.36446	5.6632	1.7648	2.81517	3.15551	6.57713	4.08093	4.90291	4.06073	3.23353	3.30969	3.52832	6.80894	5.99976	3.72947	3.96748	7.83302	7.41932	8.96337	9.49041	10.7733	11.2278	1.90146	7.45776	1.69146	6.31027	7.57393	1.55315	1.77127	5.81075	4.99231	7.09862	6.68689	2.15936	1.74428	2.11267	4.19657	2.76103	9.53851	8.14009	3.77313	1.73673	1.36183	3.33784	4.69184	3.26986
C12	C12	6.05645	3.78917	4.87519	5.23906	2.65327	2.63698	2.20475	6.64313	4.42308	5.08057	4.09221	4.28882	3.6282	4.20937	5.28918	5.38034	3.70565	3.86838	7.0462	7.58373	10.1795	8.89793	11.1214	11.5542	2.32792	7.17516	2.44578	5.57868	7.31814	1.08096	0.687903	5.21465	6.29549	5.199	5.82877	1.52854	2.70285	2.76852	3.21784	3.55356	7.75637	9.57244	2.90287	1.66676	2.68322	2.95093	4.3855	3.13325
C12	C12	6.14325	6.01935	4.09189	4.85557	2.99351	3.10949	1.88885	6.25544	5.46449	4.83141	5.10938	4.49025	5.30932	5.05562	5.36204	5.4919	4.61269	4.58327	7.58682	8.40539	9.44389	8.95893	11.4182	11.5848	1.59188	6.47585	1.87726	5.58023	6.46755	1.97314	1.26507	6.75448	7.28137	6.32456	6.87899	1.34931	2.18504	2.90106	2.79869	3.61715	9.59709	10.8087	4.01337	1.96859	2.46458	4.26531	4.96845	3.70201
C12	C12	6.15453	4.72477	4.66959	5.36474	2.78397	2.80363	2.60121	6.62653	4.33998	5.77485	3.08506	3.36601	4.47877	3.89996	5.42195	6.40986	4.24893	3.87812	7.02904	8.0486	8.3852	9.75774	11.5063	11.7995	1.96982	6.76318	2.27561	5.71063	7.29618	1.64108	1.11797	5.35914	6.58037	7.08155	7.5415	1.56437	2.24145	3.05991	2.70947	3.98427	7.55812	9.88988	2.33382	2.23593	2.86624	3.10944	3.30373	4.61731
C12	C12	6.28635	4.6215	4.78871	5.42755	2.93824	2.53788	2.64853	6.54917	4.24868	5.55496	3.66688	3.36117	4.42718	4.08812	5.33724	5.87106	4.18097	3.84531	7.15918	7.77423	8.54848	9.18907	11.5525	11.8783	2.06621	7.2668	2.49917	5.54499	7.21183	1.35389	0.898204	5.55785	6.25069	6.70177	7.29709	1.61935	2.10427	2.69235	2.82338	3.68565	7.84057	9.23139	2.27486	2.4262	3.12004	2.41838	3.8926	3.80952
C13	C13	5.74823	5.18924	6.21433	4.61254	3.14186	4.00869	2	5.23007	5.57179	4.80383	4.42724	3.35435	4.97079	4.50124	6.67659	6.24881	4.67835	4.84407	8.30904	6.6465	9.54523	8.17939	12.7421	12.3418	3.23348	7.52514	2.58592	6.02017	8.10474	1.22563	1.89307	7.53762	5.77467	8.25131	8.15083	2.66094	2.95449	2.06341	4.77357	3.17201	10.3417	7.25121	3.50159	3.37865	2.72201	2.09969	4.7331	4.3342
C13	C13	5.20548	4.15469	6.79477	4.11623	3.03833	2.75827	2.86168	4.6251	4.98793	4.74075	4.43145	3.32701	4.0899	4.12651	6.86924	5.87017	3.65939	3.49163	7.84324	6.07117	9.27702	7.39642	10.8543	10.5708	2.38533	7.48267	1.74939	6.42565	7.71822	0.233606	1.52265	7.34858	5.38664	7.57386	7.24977	2.29353	2.94767	2.18105	4.85364	2.55769	9.8628	6.57183	3.79578	2.8906	2.01933	2.43938	4.81392	4.04224
C13	C13	3.35729	6.26214	6.60474	3.05926	4.07693	3.64297	4.00476	3.28529	4.51647	8.07449	3.64742	3.6046	5.71241	3.83115	7.23445	8.88908	4.63908	3.60729	5.99662	5.63682	8.08056	7.95542	11.4319	11.6804	2.32093	7.54412	3.78922	5.86065	7.58112	0.928582	1.13493	6.62875	6.19551	9.8412	9.72914	2.72997	3.13362	2.80328	3.35396	4.60944	6.54084	5.93242	2.91361	2.2739	2.29467	2.41029	3.8144	4.06467
C13	C13	3.91561	4.64914	5.45401	3.27386	3.4603	2.64497	2.34203	3.57234	4.39793	4.81951	3.97968	2.63656	4.62436	3.96928	5.48396	5.3592	3.5552	3.71311	6.40079	4.96348	7.76529	6.80909	10.4203	10.1229	2.86766	6.74237	2.63869	4.92265	7.24842	0.163417	0.863546	6.51864	5.07065	6.95567	7.05568	2.32455	2.64238	2.24001	3.7177	2.83847	7.6482	5.16023	3.58669	1.92779	1.92779	1.7958	3.88548	3.55845
C13	C13	3.6896	4.89321	6.39698	3.37161	3.16522	4.12924	3.02267	3.76957	4.44396	7.09091	3.33243	3.57358	4.10741	3.85042	7.37303	7.78256	3.84791	3.84422	5.71872	6.13446	7.52079	8.11443	11.7008	11.1575	3.43769	7.3113	3.17158	5.79055	8.02518	1.3482	0.967949	5.58624	6.0372	8.94746	8.94873	1.55898	2.23696	2.49729	3.84159	4.58574	6.11759	6.81064	2.80026	1.81518	1.76959	3.37581	3.94708	3.57454
C13	C13	3.88094	4.53647	6.73076	3.29515	2.89774	3.26737	3.40144	3.53997	3.9135	6.36384	4.19052	2.94743	4.24307	3.35273	7.11469	7.07301	3.45162	3.35554	6.77271	5.02304	7.65395	6.89096	10.6654	10.1916	2.70636	7.66886	2.8995	5.88518	7.71024	0.775495	1.05139	6.60384	4.75823	8.4562	8.29794	2.72478	2.37609	1.77729	4.23431	3.43713	7.96737	5.08482	3.57859	2.34756	1.72852	2.05625	4.11021	3.11798
C13	C13	4.08593	4.65001	6.72558	3.49736	3.68408	2.54486	3.50802	3.79939	4.87685	5.70101	3.96251	4.15856	4.60756	4.37619	6.7784	6.34388	2.95942	3.53172	6.80897	5.44472	8.96993	7.8111	10.5934	10.7229	2.513	7.52418	2.5029	5.72783	7.64692	0.243308	1.03597	6.92499	5.55035	7.57822	7.20688	2.13651	4.17027	2.73673	4.13244	2.83482	7.95483	5.65755	3.45965	2.39802	2.13707	2.02843	3.06945	3.9814
C13	C13	4.55894	4.05319	6.94189	3.92072	3.39868	3.14215	2.91502	4.3761	5.2991	5.25503	3.66191	3.13765	3.84359	4.66533	7.18576	6.11904	3.833	4.20008	6.72002	6.23088	8.75976	7.71882	11.3451	11.2308	3.21084	7.68092	2.25733	6.0117	7.63752	0.474402	1.33781	6.50104	5.84771	8.20991	8.09164	2.35966	2.70412	2.6546	4.6528	2.9705	7.78467	6.78722	2.96056	2.54456	1.99537	2.80819	4.57532	4.30499
C14		5.49712	4.06299	6.68339	5.03673	2.67906	2.96846	4.19884	5.91892	4.58764	6.98332	3.25373	4.2738	3.42204	4.35275	7.50582	7.61927	3.27759	5.34392	6.63704	7.8802	8.96931	10.2608	11.6854	11.2855	2.54772	7.579	1.69628	6.34796	7.77139	1.19516	1.55385	5.07764	6.63429	8.11453	8.34098	1.87674	2.53906	2.83602	3.30143	4.05692	6.52444	9.1693	2.56634	1.75052	2.59416	3.47492	3.71844	3.87061
C14		5.03805	4.92362	6.64592	4.65424	3.28028	2.60661	4.80128	5.4305	5.12959	7.34119	3.82801	4.69285	4.18812	4.86823	7.49904	8.09266	3.4271	4.75706	6.51986	7.82468	9.19332	9.49806	11.17	11.3645	1.5915	7.50512	1.68192	6.32942	7.10834	1.13393	1.79789	5.56517	7.15635	8.30126	9.01764	1.66512	3.02776	2.81796	2.91297	4.02629	6.49514	9.08832	3.39584	1.13086	2.44987	3.88144	3.88522	3.7587
C14	C14	5.09765	4.47139	6.60693	4.54602	3.15972	2.85651	3.86327	5.31702	4.63293	6.92214	4.07568	3.9803	4.26133	4.46901	7.03182	7.31842	4.31291	4.47334	6.89208	7.39057	10.0811	9.17726	11.9746	11.6423	3.09137	8.58608	2.61526	6.58091	9.04483	1.11579	1.17	5.99207	6.70712	7.50635	8.23233	1.76257	3.29104	3.22488	3.65033	4.0985	7.48752	8.58538	2.67761	2.45871	2.68141	3.2048	4.63895	4.51087
C14	C14	4.94967	5.81495	5.29798	4.56997	3.82757	2.05596	4.37693	5.53023	4.09647	8.31993	3.66223	3.72705	5.11082	4.0163	6.25914	8.41829	4.45303	3.91567	7.00151	7.5644	9.17298	9.54389	11.8562	10.2281	1.52445	7.75954	1.50164	7.05216	8.25025	1.46451	0.327638	6.09688	7.62198	8.2279	9.17711	1.20722	2.9282	3.65531	2.40857	5.07057	7.23866	9.16479	2.31142	2.69701	4.07137	2.26932	3.94322	5.15471
C14	C14	5.87132	4.87074	5.44518	5.02996	3.24719	2.70821	2.88225	6.189	4.748	6.12608	3.79626	4.63737	4.30996	4.6909	6.20838	6.22626	4.12521	4.54691	7.18359	8.24261	9.29376	9.70511	12.1363	11.4557	2.59537	7.79951	1.91826	6.3872	7.93567	1.2173	0.486524	6.1683	7.18979	7.2859	7.52232	1.26311	2.61847	2.62714	3.29334	4.17473	8.15851	10.137	3.26839	1.93287	2.70638	3.75493	4.2859	3.98084
C14	C14	5.72546	5.0224	5.69159	5.08693	3.05851	2.50033	3.96027	6.04109	3.21112	8.09351	3.74258	4.1797	4.56105	3.03962	6.39891	8.32843	4.58792	3.31032	6.85931	8.19005	8.55552	9.95262	11.7138	11.4915	2.00706	8.36398	2.4057	7.20034	8.80947	1.28845	0.573004	5.67471	6.95078	8.37804	8.47141	0.834686	1.72885	2.68834	2.75546	5.29045	7.23268	9.68009	2.76752	1.94626	2.68334	3.62672	4.58172	3.5313
C14	C14	5.34511	4.21882	6.99084	5.00987	3.04286	3.31974	4.144	6.10158	4.95536	7.84074	3.29273	4.74903	3.61311	4.68024	7.70046	8.36586	3.39706	4.27278	7.06029	8.05713	9.51642	9.77835	12.7969	11.6871	3.20161	8.33761	2.03571	6.97091	8.80726	0.9824	1.29282	5.39328	7.49006	8.41746	9.03656	1.33955	3.12351	3.04288	3.64933	4.80399	6.87762	9.8171	2.24076	2.4199	2.57398	4.07397	3.78751	4.54208
C14	C14	5.26811	4.79441	5.74181	4.60424	3.31068	3.26406	2.63373	5.5483	4.66645	6.43015	3.65701	4.19493	4.37634	4.43481	6.26523	6.7811	4.17139	4.36336	6.85642	7.74799	8.64456	9.45842	12.5572	11.628	3.38331	7.97137	2.45043	6.38622	8.61597	0.877756	0.853276	6.08307	7.03634	7.83644	8.06373	2.44836	2.39965	2.71951	3.66462	4.49784	7.64062	9.32751	2.8181	2.27565	2.0908	4.12811	4.28687	4.08996
C14	C14	5.77949	5.03831	5.73109	4.92753	3.30704	2.5894	3.28543	5.69171	5.16644	5.43939	3.78801	3.72777	4.85229	4.6121	6.06409	6.38267	4.82142	4.81642	7.54799	7.17754	9.49673	8.61681	12.1653	11.0918	2.60761	6.57228	1.37462	5.72043	7.65943	0.926506	1.62856	6.56002	6.22269	8.01688	8.16844	1.76023	2.62662	2.1066	3.41449	3.05384	8.73817	8.06781	1.86991	3.81672	2.07974	3.17368	4.65196	3.92006
C14	C14	5.45169	4.92469	6.00378	4.71459	3.16744	2.53898	3.74448	5.56738	4.80268	6.35772	4.25913	4.52816	4.66333	4.47063	6.52325	6.95982	4.60725	4.23958	7.34993	7.46365	9.65528	8.7077	12.1427	10.6428	2.77269	7.2211	1.32677	6.4	8.51569	1.24727	1.30251	6.3946	6.66997	7.79804	8.02501	1.79454	2.5239	2.27107	3.3805	3.72258	8.37672	8.74785	3.25235	2.33874	1.47085	4.36566	5.02639	3.35197
C15	C15A	5.23609	5.32949	5.49142	4.50132	2.73061	3.80145	2.77037	5.56416	5.50234	5.99655	3.98873	4.74045	4.60374	5.24784	6.88618	6.87827	4.36071	4.93447	7.27721	7.9651	8.66575	9.19523	11.6274	12.2323	2.09084	8.23158	2.75929	6.33292	7.58496	2.20097	2.00133	6.24751	7.20772	7.98599	8.04686	1.66204	2.49864	2.68685	3.44843	4.06106	8.39391	9.84286	3.33378	2.32309	2.42419	4.209	4.14236	4.14113
C15	C15A	5.52695	4.9153	6.1386	4.61319	3.29192	3.09977	2.8347	5.41519	5.79243	5.03796	4.19997	3.9041	4.57679	5.52899	6.86044	5.85114	4.48448	4.8414	7.63833	7.31113	8.99983	8.53278	11.5794	12.1441	2.28353	8.06898	2.43162	6.07645	7.40067	1.54531	1.82987	6.92093	6.55804	8.04575	8.05267	2.48562	2.61157	2.49681	4.08284	3.01405	9.13185	8.50794	3.36536	2.72254	2.57129	3.10067	4.57679	4.19742
C15	C15A	4.94936	5.20446	6.04409	4.29149	3.84143	2.77509	3.13686	4.98075	6.09035	5.22954	3.85692	4.16896	5.01801	5.9188	6.60758	5.80756	5.18979	5.19536	7.08643	7.143	8.95561	8.37691	12.0266	11.648	2.93092	7.39976	1.98652	5.71282	7.84303	1.50809	1.57501	6.80632	6.89907	8.42146	8.40569	1.20012	2.65134	2.42419	3.67969	2.97954	8.10486	8.23821	2.77004	2.86548	2.92105	2.80389	4.68215	3.97243
C15	C15A	6.00946	4.99856	5.31829	4.9513	2.57992	2.88721	3.03309	5.9203	4.71146	5.45232	4.51829	3.80264	4.81279	4.26037	5.93897	6.55032	5.10691	4.2829	7.61682	7.49821	8.53349	8.19385	10.7373	11.6147	1.27767	7.39236	2.2589	6.00584	6.91653	1.56388	1.98446	6.36702	6.16398	7.83899	8.04391	1.3964	1.5715	1.98125	3.28991	3.36837	9.19371	8.87679	4.1289	1.68081	2.02889	3.58053	5.16475	3.22828
C15	C15A	5.40819	3.63468	6.78539	4.59442	3.25924	2.9245	2.66842	5.34017	5.90026	4.38875	3.51373	4.32387	3.51035	5.65711	6.94374	5.5315	4.2849	4.83092	7.17191	6.96468	9.84689	8.3078	11.9634	11.4627	3.54663	7.69954	1.72484	6.14706	8.03548	0.424061	2.30264	6.3942	6.17106	7.47426	7.12375	2.60416	3.07071	2.28405	4.7342	2.4943	8.3601	7.95622	2.98475	2.52059	2.6525	2.58617	5.01261	3.81934
C15	C15A	6.17776	5.43457	5.47482	4.96224	2.92627	2.46972	3.36689	6.17419	5.3853	5.51779	4.4964	4.90781	4.99733	5.33068	6.41076	6.10044	4.41019	4.97896	8.15147	8.19261	9.58304	9.60853	10.4065	12.2208	0.544882	8.43591	2.5131	6.54445	6.83536	1.80348	1.74567	7.11463	7.12916	7.4007	7.43418	1.68406	2.91622	2.42179	3.41282	3.45979	10.1469	10.1927	4.22358	2.25552	2.8495	3.6606	4.33371	4.19312
C15	C15A	5.30249	5.10864	6.06651	4.46034	3.4677	2.82876	3.10383	5.06006	6.33975	4.32447	3.99918	3.39438	4.75561	5.62532	6.71518	5.8896	4.29429	5.40511	7.51086	6.72716	8.95722	7.86818	11.3671	11.2487	2.0675	6.30618	1.06793	5.47696	6.51516	1.37833	2.4571	6.9673	6.11432	8.20912	8.28263	0.971129	2.80683	2.34174	3.84168	2.16139	8.91041	7.42534	2.63827	3.40554	1.91903	3.11781	4.17506	4.27281
C15	C15A	6.37884	4.9508	5.30971	5.21399	2.84397	3.3757	2.16716	6.25576	5.39847	4.66407	3.866	3.45951	4.25388	4.64046	6.30925	5.73808	4.21944	4.44486	7.86635	7.63764	9.35285	9.36761	12.0876	11.8464	2.34169	6.60753	1.79737	5.65422	6.64591	1.51129	1.57054	6.5519	6.25288	7.27833	7.20265	1.96577	2.77272	3.00901	3.7494	3.10132	9.56492	9.03775	2.91436	2.98404	2.4343	3.13876	4.26093	4.86086
C15	C15B	5.45893	5.15004	5.90197	4.60926	2.89037	3.52149	2.91993	5.3776	5.80235	5.08501	4.8015	3.93814	4.7035	5.28534	7.18201	6.20934	4.81199	5.15393	7.42203	7.34061	8.78393	8.66445	11.722	11.7526	2.31697	7.17184	1.87126	5.81565	7.17838	2.3355	2.02244	6.54627	6.35255	8.05371	8.15275	1.32869	1.87122	2.44921	3.75771	3.00774	8.74247	8.48347	3.0959	2.7588	3.33534	2.34723	5.24453	3.25738
C15	C15B	6.23915	5.15916	5.48489	5.06472	3.71932	2.47037	2.45078	6.03339	5.81541	4.47762	4.5911	3.60917	4.95516	5.67034	5.88465	4.93367	5.02729	5.26329	7.99891	7.56425	9.06931	8.7896	11.6011	12.453	1.89934	7.77451	2.48488	5.67895	6.83795	1.0676	1.30386	7.23611	6.72472	7.55836	7.74029	1.16693	2.22047	2.52526	3.77334	2.76647	9.8348	8.8972	3.53553	2.665	2.65785	2.95438	5.12154	4.01086
C15	C15B	6.02939	4.99862	5.24607	5.0749	3.00158	2.58748	3.03382	6.26078	5.13126	5.50657	4.01002	3.35709	4.93176	5.31377	5.6811	6.08299	4.90719	5.26467	7.53779	8.00286	8.69727	8.63889	11.4263	11.7785	1.91551	7.85422	2.23951	6.05764	7.57101	1.40693	2.05164	6.30868	6.89972	7.88397	8.38535	0.907146	1.88548	3.0395	3.16003	3.51905	8.82914	9.85446	3.76527	1.793	3.08384	3.11986	4.55525	4.59207
C15	C15B	5.84836	4.03849	7.2549	5.03077	2.49849	3.48132	3.73478	5.83922	5.30158	5.97415	3.81861	3.5695	3.69151	4.74416	8.00363	7.2704	4.29387	4.80003	7.69946	7.56899	9.50815	8.61271	11.6836	12.1827	2.41956	8.46143	2.20577	6.82106	8.18055	1.53699	2.25947	6.30905	6.21496	8.82703	9.03792	1.14702	2.44652	2.44537	4.4831	3.32977	8.81118	8.61974	2.49825	3.30719	2.38316	3.29617	4.89501	4.40962
C15	C15B	7.68003	5.51745	5.67969	6.17245	2.12219	3.73422	3.14274	7.14303	4.94366	5.47056	5.38832	3.87549	5.2307	4.30977	7.25543	6.92536	4.91325	4.62415	9.03057	8.1437	9.80012	9.76911	12.3774	12.9446	1.30684	7.44493	2.18994	6.13515	6.94943	2.91208	2.34082	6.96198	5.6846	7.96854	7.9499	1.20781	1.78199	2.00158	3.65311	3.18944	11.1619	8.90748	4.82514	1.79744	2.36628	2.91758	5.25293	2.9575
C15	C15B	5.27981	5.63174	3.86839	4.43053	2.83891	3.42293	1.71016	5.30595	4.34172	5.20545	3.44231	3.06864	4.66492	3.95116	5.23621	5.80667	4.9236	4.14325	6.95514	6.72631	8.8412	8.61169	11.2923	11.0452	1.85477	6.33678	2.59321	5.09001	6.21088	1.82452	1.11575	5.96702	5.9021	6.78661	6.97686	1.11954	2.66726	2.86003	2.62699	3.8737	8.23437	7.98178	2.89032	2.40265	1.7215	3.41155	4.22275	4.64385
C15	C15B	5.70082	5.1188	4.7171	4.76964	3.59224	2.65004	1.987	5.731	5.29611	4.59186	3.1956	3.48452	5.07957	5.16124	4.96916	4.96916	5.21872	4.64288	7.10514	7.35873	8.71186	8.8454	11.4905	12.338	2.43676	7.58337	3.03776	5.13143	7.11872	1.03863	1.13013	6.43954	6.59066	7.25115	7.06927	1.20791	2.84364	2.90787	3.22813	3.15313	8.38926	8.78144	3.15466	2.15642	2.55727	3.00359	3.92145	4.90538
C15	C15B	5.77301	4.34979	7.41746	4.9197	3.10745	3.34585	3.57464	5.4825	6.12731	5.04779	3.74136	3.22895	3.93338	5.2888	8.16403	6.79354	4.58989	5.11294	7.80068	7.0401	9.83504	8.1696	12.5586	11.7914	3.16885	7.30577	1.18327	6.36647	7.85602	1.45805	2.64776	6.85425	5.8702	9.13339	9.00138	2.7281	2.87726	2.37092	4.73449	2.44677	9.07459	7.45575	2.66621	3.42182	2.25105	2.7513	4.93905	4.59505
C16		6.08789	5.03784	6.09586	5.13844	3.21171	2.94021	3.2454	6.12895	5.16089	6.04791	4.58365	4.72068	4.71387	4.93114	6.63743	6.66401	4.25969	4.45348	7.98353	7.87775	10.8758	9.23415	12.5272	11.9398	2.60924	8.07372	2.08079	6.56678	8.32409	1.1792	1.53458	6.83237	6.85063	7.21844	7.58946	2.85951	3.34258	2.69303	3.80811	3.74124	9.37545	9.31252	2.91664	3.14527	2.2729	3.75064	4.77237	4.00777
C16		5.61599	4.39005	6.77202	4.77291	3.58897	2.77444	3.123	5.69067	5.67347	5.63704	4.81517	5.07119	4.1017	5.67384	7.0896	6.03859	3.54331	4.74439	7.76286	7.6062	11.1098	9.03443	12.7758	11.3321	3.46584	8.13195	1.61181	6.7197	8.13481	0.495807	1.5342	6.97656	7.04505	6.99502	7.23089	3.00191	3.47264	2.92173	4.4775	3.41852	9.08331	9.02275	3.10186	2.94111	2.26013	3.75388	5.06398	3.68341
C16		5.92322	4.83884	6.07699	5.2751	3.53222	2.94776	3.24143	6.26645	4.96446	6.5839	3.96704	4.90865	4.30546	4.78119	6.74582	6.81284	3.68384	3.76673	7.48278	7.91253	9.48971	10.2293	12.4483	12.7419	2.39795	8.24409	2.84309	6.32416	7.74053	1.04232	0.547858	6.21104	7.04647	8.3841	7.68078	1.76455	2.06595	2.81961	3.5741	4.17397	8.00512	9.28346	3.2058	1.99079	2.50631	3.51525	4.49518	3.26751
C16	C16	5.37389	4.82544	5.60889	4.80274	3.0717	3.29984	2.95381	5.46063	4.20367	6.39909	3.17048	3.20732	4.35293	3.91776	6.43586	6.79594	4.06026	3.54771	6.72616	6.94569	8.48096	9.5056	12.1124	11.9602	2.78904	7.56583	3.03248	5.59536	7.76083	1.50836	0.821397	5.6093	5.89641	7.73316	7.80632	1.62784	2.87015	3.12247	3.25585	4.04835	7.11993	7.61611	2.43161	2.26805	2.6877	2.33947	3.29862	4.61698
C16	C16	4.50479	4.80981	5.27555	3.81745	3.30314	3.08143	2.16196	4.38121	4.94677	4.86191	3.94649	3.50396	4.35089	4.55188	5.9252	5.39126	3.70741	4.24229	6.46117	6.25615	7.59523	7.96223	10.6824	11.0959	2.37649	6.99682	2.63916	5.19297	6.56154	1.12747	0.937011	6.24075	5.88823	7.24079	7.22756	2.20398	2.2077	2.31178	3.61082	3.18059	7.60514	7.10701	2.96274	2.29459	2.5793	2.33867	3.90307	3.36141
C16	C16	5.22094	4.25979	5.94724	4.62381	3.10205	2.85192	3.08567	5.34833	4.47728	5.97881	3.24618	3.21823	3.96758	3.99754	6.30403	6.58824	3.771	3.92978	6.73777	6.88098	8.84784	8.17925	12.2441	10.6078	3.4124	6.65964	1.6583	5.76879	8.06298	0.65069	0.977088	5.72403	6.04334	7.61077	8.16603	1.59701	2.67326	2.46968	3.54827	3.62711	7.32628	7.78467	2.41812	2.4363	2.23703	2.91461	3.95171	4.26406
C16	C16	4.73751	4.84331	6.21451	4.17252	3.72777	2.41126	3.60004	4.96569	5.6517	5.93873	3.90718	4.20773	4.35594	5.31402	6.78626	6.39071	3.53229	4.92942	6.91703	7.31599	8.57924	9.22878	10.8865	11.1823	1.85641	7.395	1.82638	6.18542	6.99469	0.857936	0.905589	6.52859	7.206	8.12562	8.30396	1.04385	2.67463	2.92814	3.55097	3.44267	7.76267	8.70359	3.22604	2.21145	2.63424	3.46907	4.00226	4.26808
C16	C16	4.70287	4.77065	6.40999	4.19999	2.92562	2.96913	4.09034	4.88287	4.92924	6.67934	3.48363	4.3888	4.23423	4.64295	7.33587	7.42188	3.89433	4.3016	6.65095	7.15729	8.20174	8.26245	11.1751	10.81	2.25605	7.59134	1.83379	6.29161	7.79899	1.6313	1.6939	5.8742	6.54864	8.67377	8.72591	1.47366	2.50133	2.21939	3.34684	3.75509	7.27343	8.28631	2.92545	2.19517	2.05787	3.77577	3.74299	3.6742
C16	C16	5.18394	4.56458	6.08733	4.53559	3.40661	2.50674	3.40634	5.29585	4.92883	5.95301	3.63857	3.83474	4.27907	4.42827	6.39069	6.61349	3.34023	4.0647	6.82575	7.26489	8.9005	9.27629	10.7099	11.5475	1.70523	7.36214	2.25853	6.02542	6.65903	0.423216	1.09409	6.16124	6.5909	7.58091	7.66247	1.6347	2.94537	3.14719	3.50599	3.52064	7.61132	8.40915	2.58035	2.54722	2.27634	3.38023	3.71849	4.51803
C16	C16	5.44723	6.04002	6.32904	4.74833	3.8133	3.0134	3.95537	5.39139	5.56585	6.67641	4.4053	4.79214	5.77436	4.7816	6.69844	7.95145	4.97605	4.37551	7.67408	7.51986	9.58429	9.11124	12.493	12.2131	2.14734	7.41007	2.07671	6.27422	7.87658	0.86252	2.01346	7.14873	6.95216	9.18037	8.98235	2.08363	2.73922	2.3836	3.46505	3.70899	8.6981	8.38463	3.31853	2.72353	2.15019	3.67142	4.76699	3.46058
C16	C16	6.4427	5.6616	6.96778	5.64119	3.77605	3.39437	3.88777	6.41306	4.89128	7.67999	4.70758	4.51668	5.21487	4.52134	7.49917	8.2458	4.11522	4.3797	8.17938	8.35197	10.2329	11.2187	14.1316	13.3531	3.09992	8.81619	2.77709	7.05049	9.07652	0.874944	1.1742	7.10941	7.13876	9.04941	8.76057	2.43942	2.8795	3.54343	3.99399	4.67742	9.03581	9.21011	3.82292	2.16768	2.77494	3.33744	4.68706	4.25603
C17	C17A	4.9384	4.98938	4.67778	4.43639	3.38196	2.45291	2.84957	4.89807	4.08929	5.49891	3.22296	3.00908	4.59031	3.85422	5.39048	5.77257	4.058	3.43369	5.94748	6.21725	8.34451	8.77913	10.7437	10.9352	1.83371	5.88148	2.45524	4.45859	5.96924	1.36147	0.4946	5.34089	5.38009	6.61734	6.72618	1.61176	3.08318	3.27041	2.40959	3.20611	6.13399	6.43509	1.50316	2.55888	2.88743	1.37208	3.00266	4.2451
C17	C17A	5.82549	3.92752	4.40148	4.94161	2.62541	1.59341	2.84646	5.96561	3.53773	4.99162	3.84523	3.4354	3.72627	3.43952	4.74058	5.15309	3.48935	3.0608	6.62372	6.87395	8.19587	8.41358	9.7764	9.79217	1.26186	6.17494	1.52775	5.14287	6.06367	0.804886	0.527669	5.13293	5.45201	5.66039	5.70851	1.21219	1.70209	2.39844	2.49398	3.07888	7.49562	8.12026	2.65741	1.76038	2.12367	2.65458	4.24733	2.61884
C17	C17A	5.42843	3.34974	4.87361	4.62132	1.96716	2.63521	2.3983	5.28668	3.0697	4.93892	3.04787	2.61905	3.116	2.69453	5.30255	5.50985	3.54395	2.75485	6.15238	6.20837	8.30746	7.84762	9.74388	10.0896	2.0115	6.39648	2.34436	4.96195	6.39805	0.93936	0.976184	4.64393	4.4598	5.6569	5.84628	1.95302	2.25703	2.30465	3.05675	3.1142	6.91251	6.71655	2.46018	1.7078	1.86459	2.18165	3.81064	3.4165
C17	C17A	4.3435	3.40936	3.71484	3.70108	2.14761	1.94102	1.98188	4.73842	2.67941	5.09254	2.93691	3.59479	3.32971	2.57341	3.99145	5.22407	3.26612	2.51218	5.37176	5.97446	6.83338	7.46979	8.61206	8.65393	1.85305	6.23669	2.12272	5.1896	6.78921	0.860361	0.320937	4.36109	5.24783	4.84519	4.87866	1.05109	1.82959	2.05833	2.30515	3.72672	6.16797	7.64989	2.05854	1.77579	1.94636	2.80974	3.32288	2.69112
C17	C17A	4.66244	4.05053	3.69221	3.99077	2.15208	2.43313	2.04213	4.81765	2.87094	5.12955	2.82597	2.24067	3.42098	2.8269	4.69705	5.18444	3.11539	2.75775	5.5868	6.07184	6.96623	7.80389	9.06706	9.4686	1.40993	6.50332	2.51959	4.90547	5.85494	1.47206	0.205644	4.51077	5.00779	5.47798	5.92678	1.41453	2.00916	3.06194	2.19707	3.63778	6.32098	7.27528	1.92477	2.02329	2.62206	1.92703	2.84539	4.22213
C17	C17A	4.13387	3.44	4.9698	3.43844	2.75767	2.38014	1.85725	3.93439	3.08104	4.92295	2.65163	2.53639	3.36682	3.17124	5.05393	4.83718	2.82712	2.60837	5.78677	5.2024	7.55047	6.945	9.82299	9.17727	2.99673	6.68695	2.59964	5.15425	7.36917	0.224913	0.156963	5.41718	4.77306	5.80796	5.64719	1.91356	3.45066	2.67282	3.57488	3.4228	6.94921	5.81633	2.65382	2.01207	1.46052	2.44641	2.4858	4.89842
C17	C17B	4.55499	2.30644	5.1258	3.94801	1.58468	2.02392	2.83324	4.86026	3.03125	4.8991	3.02794	3.31026	2.14275	2.8433	5.39547	5.30793	2.30711	2.74739	5.3363	6.17093	6.67543	7.11739	8.26078	8.56688	1.88149	6.49315	1.51585	5.43446	6.6317	0.614993	0.955482	3.9817	4.94154	5.40884	5.67938	1.00234	1.37472	1.80009	2.99435	3.10866	5.8627	7.57799	2.52628	1.1111	2.24591	2.45416	3.57142	2.34931
C17	C17B	4.84181	3.93996	4.84944	3.92522	2.21846	1.98442	2.92262	4.8226	3.3595	5.39502	4.23598	3.61089	3.81067	3.26625	5.30091	5.60963	3.1259	2.934	6.50414	6.39293	7.69132	7.76147	8.89322	9.27379	1.26181	7.35219	1.99125	5.99132	6.92119	1.22528	0.72492	5.62023	5.53262	5.61395	5.83606	1.7786	2.08388	2.41356	3.02315	3.45174	8.02098	7.84786	3.72097	1.45219	2.26975	2.79059	3.90842	3.08915
C17	C17B	4.82316	3.18902	3.87382	4.15844	2.11988	1.74235	2.22723	5.18344	3.31026	4.28017	2.7272	3.13494	3.01699	3.15731	4.18788	4.56587	2.86804	2.75895	5.66608	5.95615	7.05019	7.04927	8.56974	8.65936	1.39509	5.51876	1.52522	4.52215	5.53488	0.74673	0.737841	4.25141	4.91087	4.89816	5.05964	1.94696	1.91351	2.01976	2.30845	2.77429	6.29599	7.36189	2.33502	1.42552	1.63858	2.74392	3.00952	2.89624
C17	C17B	4.98648	4.41386	3.69572	4.20576	2.05477	3.02265	1.76247	4.90109	3.69798	4.27273	3.03299	3.46387	3.73338	3.22805	4.93591	5.05026	3.49033	3.2359	5.63916	6.31703	6.61925	7.66052	9.58529	9.88025	1.5882	5.27468	2.00537	4.23169	5.23661	1.81656	1.27217	4.59279	4.83106	5.86458	5.72264	0.874341	1.68584	1.69553	2.32873	2.98427	6.45265	7.2462	2.03264	1.96706	1.94076	2.55161	3.02907	2.42933
C17	C17B	5.57613	3.57489	4.3025	4.6236	2.22839	1.75929	2.54407	5.6949	3.26975	4.77542	2.90633	3.69036	3.45577	3.14851	4.48115	5.13861	3.21684	2.9732	6.35968	6.61702	7.62595	7.74969	9.81926	8.82712	1.97678	5.87761	1.06233	5.20229	6.68447	0.504686	1.00076	4.92252	5.21156	5.60474	5.45684	0.920307	2.1198	1.72778	2.60608	3.09784	7.48372	8.05847	2.12863	2.2539	1.5644	3.15663	3.22937	2.9723
C17	C17B	4.40311	4.35116	5.62264	3.92117	2.92181	2.56445	3.39585	4.58274	4.51673	5.86396	2.96613	3.55126	3.79963	4.12412	6.27317	6.51038	3.48573	3.94803	5.88396	6.77476	8.08749	8.22791	9.89686	10.2924	1.74129	6.81533	1.90639	5.59403	6.42926	0.917484	1.25061	5.33838	6.17853	7.49462	7.66547	1.37743	2.61129	2.73987	2.98968	3.47691	6.39071	7.89722	2.57018	1.86383	2.40413	3.07454	3.50681	4.26987
C18		5.93339	5.26087	5.03881	5.15341	2.29945	3.4939	3.15238	6.2617	4.70769	6.1619	4.3428	4.57737	4.72186	4.35356	6.67442	7.18305	4.89535	4.59958	7.1888	8.11394	8.51075	9.55501	11.7353	11.5366	1.8123	7.05347	1.84949	6.0379	7.34427	2.67456	2.02062	5.55909	6.62983	7.76863	7.79304	1.4177	1.51713	2.31018	2.76267	4.00998	7.95306	9.82437	2.74963	2.30754	1.79018	4.45792	4.82396	2.74963
C18		5.33197	6.29003	5.24734	4.46952	3.81717	2.97633	2.8777	5.04019	3.13514	7.77088	5.38359	3.52618	6.03761	3.3365	5.77212	7.58315	4.45874	3.17529	7.95752	6.52488	10.6889	9.17687	13.346	11.3066	3.29086	7.8905	3.34083	6.92134	9.92931	1.31812	0.316047	7.46384	6.23024	6.78464	7.60434	2.32239	3.82341	3.4553	3.29374	5.34784	9.49326	7.08592	2.86883	3.62394	3.00705	1.8556	4.55962	4.55962
C18	C18	4.99376	5.49046	5.36857	4.81292	3.29291	3.37289	3.79997	6.04465	4.52459	8.61962	3.93448	5.54047	4.41482	4.46635	7.18681	8.9789	4.11321	4.39186	5.58966	9.34112	8.99584	11.0292	12.0121	13.0529	2.02449	8.7724	3.15816	6.85794	8.52348	2.505	1.35393	4.36872	8.63031	7.77494	8.66263	0.559094	2.69084	3.74772	1.97496	6.05947	4.17444	11.6628	1.26883	1.59515	5.00551	2.98457	4.0655	2.96603
C18	C18	5.51164	6.09234	5.21463	4.59596	3.35986	3.27302	2.79558	5.4477	5.55359	5.6222	4.76723	4.41334	5.63649	5.04258	6.20421	6.5775	4.86387	4.73701	7.67804	7.63057	8.7964	9.46871	12.52	11.4302	2.54683	6.85768	1.67977	5.91034	7.73152	1.90335	1.7514	7.05369	6.91138	7.91954	7.80405	1.9986	2.43706	2.80333	3.25461	3.60762	9.19305	9.01626	4.23921	1.94123	2.85492	3.21289	4.5179	3.80839
C18	C18	4.92334	4.08303	6.59284	4.3695	3.07216	3.44059	2.96215	5.2471	4.68836	6.68956	4.22238	4.91584	4.03383	4.18742	6.64338	7.49478	3.16768	4.10246	6.71935	7.5169	8.88524	9.65989	11.609	12.3093	3.0196	8.88916	3.32595	6.74923	8.61748	0.0959081	1.44645	5.87344	6.9333	7.306	7.55171	1.95122	2.74859	2.78728	4.2215	4.49847	7.37435	9.02242	2.66785	2.37989	3.23959	2.95237	4.46322	3.26825
C18	C18	5.1199	4.72233	5.61955	4.45814	2.97751	3.01325	3.01441	5.07398	4.12759	6.12153	4.06149	4.03155	4.24893	3.97178	6.48031	6.32376	3.82857	4.00924	6.55467	6.83413	8.51856	9.24233	11.418	11.2682	2.58994	7.58393	2.67934	5.71112	7.59757	1.56462	0.509787	5.78668	5.84002	7.06417	6.97992	1.68757	2.5717	2.77251	3.29066	3.81031	7.32534	7.60531	2.63714	2.2626	2.9578	2.14345	4.03935	3.14341
C18	C18	5.18743	4.59722	5.80815	4.42469	2.59578	2.97747	3.30217	5.08047	4.05514	6.13569	4.5535	3.65869	4.33153	3.8474	6.64324	6.57377	4.88255	4.19443	6.86768	6.81936	8.83172	9.44386	11.3444	10.6681	2.64634	7.62231	2.20112	6.06102	8.08451	1.80825	1.10775	5.94426	5.71747	7.19185	7.14889	1.30632	2.1162	2.86911	3.41396	3.67903	7.96102	7.68671	2.9174	2.40747	1.7398	3.41841	5.44771	3.19509
C18	C18	5.16374	4.84235	6.16245	4.41811	2.47919	3.75351	3.18304	5.10977	4.08276	6.80703	4.37606	4.2733	4.00988	3.38649	7.26309	7.73952	3.66233	3.56237	7.17761	7.06318	9.07431	9.15287	11.6907	11.1414	2.56973	7.66326	2.47585	6.63813	8.0125	1.54124	1.35454	6.19433	6.0247	7.58668	7.65351	1.58108	2.7342	2.57957	3.80573	4.366	8.32967	8.07794	3.05595	2.61351	3.28103	2.22492	4.49984	3.50032
C18	C18	4.61298	5.21693	6.34785	3.97627	3.61304	2.98735	3.36817	4.48306	3.68855	7.55054	4.09247	4.00497	5.09397	3.54941	6.48485	7.7233	4.34004	3.30112	7.03975	6.58155	9.12325	9.19911	12.4416	11.2956	3.47428	8.94902	3.30467	6.81652	9.59536	0.311679	0.43518	6.86596	6.34467	8.04012	7.7969	2.87753	3.38288	3.18354	3.83377	4.83044	8.14787	7.31524	3.06224	2.76554	2.04081	3.1886	4.34171	4.50836
C18	C18	3.90535	4.42842	7.94956	3.35828	3.81426	3.36676	3.46303	3.7832	6.32059	5.67023	4.60771	3.32483	4.08121	5.71586	8.37498	6.72379	3.67211	4.88982	7.15519	6.46237	8.91394	8.05976	10.8802	12.1782	2.64567	9.38477	2.96206	6.90794	7.92265	0.766208	1.85501	7.38019	6.71064	8.82187	9.07192	1.97587	3.05995	3.55329	5.27653	3.04675	8.31154	7.26324	3.41568	2.90348	3.24644	2.27965	4.95499	5.12312
C19	C19A	6.51248	5.33185	5.67445	5.06143	3.07556	2.68811	2.79031	5.72946	5.26932	4.41365	4.96572	3.86024	5.01227	5.00652	6.57766	5.38332	4.86814	4.93959	8.68059	6.71439	9.69959	8.19133	11.844	11.1936	1.9451	6.85025	1.48637	5.66268	6.7422	1.91221	1.98462	7.62482	5.44022	7.56081	7.33963	2.62566	2.56675	1.50669	3.94469	2.32423	11.1508	7.09746	4.23709	2.76925	1.70272	2.75854	5.14369	3.02638
C19	C19A	5.84992	4.32426	5.3635	5.00949	2.38982	2.40505	3.5011	5.97267	4.5554	5.33564	3.8132	3.55069	3.56613	3.94241	6.33777	6.33898	3.97415	3.97594	7.33431	7.10461	8.95746	8.21419	10.7131	9.92918	1.46247	6.0466	0.747006	5.68155	6.23123	1.33298	1.60772	5.68936	5.75413	7.27526	7.48344	0.736387	1.96153	2.0935	3.06567	2.97917	8.38251	8.29468	3.28549	1.94143	2.55643	2.6157	4.78447	3.38163
C19	C19A	6.2926	5.01947	4.7779	5.29463	2.9949	2.38133	2.86734	6.58684	4.56491	5.69058	3.86525	4.26948	4.82862	4.44285	5.48397	5.93245	4.28595	4.44759	7.54568	8.01651	8.75401	9.59706	11.3412	11.5933	1.5918	7.41626	2.14063	5.99306	7.22993	1.67199	0.800801	6.11061	6.76796	6.91789	7.09226	1.48253	2.37984	2.51362	2.84355	3.77581	8.77704	9.93779	3.88445	1.46165	3.18485	2.86683	3.74059	3.84681
C19	C19A	5.54765	4.71077	5.38922	4.64901	2.39052	2.8236	3.24982	5.57504	4.63604	5.51381	4.35339	3.82657	4.59384	4.02727	6.28178	6.51064	3.93054	3.96777	7.12677	7.36475	8.27657	8.97639	10.0689	11.0807	1.09431	7.0421	2.00583	5.98484	6.76268	2.06836	1.61549	5.96096	6.13779	6.94032	7.1023	1.72802	2.20985	2.81873	3.17698	3.35351	8.42908	8.78929	3.67348	1.76758	2.60442	3.06899	3.95276	3.67378
C19	C19A	5.84992	4.91567	5.70391	4.92522	2.18663	3.54104	3.21326	5.89125	3.9363	6.7583	4.75015	3.29322	4.20134	3.48922	7.06514	7.47348	4.16301	3.17377	7.66914	7.54882	8.9639	8.80619	11.3227	11.7567	1.71008	8.23992	2.80744	6.83965	7.89401	2.13255	1.28391	6.20127	6.19547	7.55431	7.98829	2.24588	1.98316	3.22684	3.49457	4.40899	9.03582	8.9539	4.4609	1.36787	1.86956	3.90399	5.01865	4.16367
C19	C19A	6.19441	5.14044	6.14696	5.09173	2.90389	2.71602	3.6582	5.9268	5.37909	5.42066	4.18916	3.56349	4.50916	4.91104	7.31264	6.31363	4.27237	4.61328	8.03764	7.67183	8.85954	8.80349	11.1227	11.6091	1.24889	7.31007	1.5069	6.28911	6.85767	1.95649	1.67379	6.97007	6.32769	8.61683	8.51558	1.23564	2.43365	2.47677	3.7193	2.99971	9.74814	8.77332	3.77618	2.52054	2.41421	3.25627	4.30103	4.47651
C19	C19A	6.05448	4.59546	6.19693	4.9043	2.8945	2.62493	3.22273	5.75799	5.7591	4.50479	4.05171	4.50514	4.91213	5.78095	6.40616	5.83088	4.73047	5.67134	7.9137	7.36628	8.92113	8.38453	11.0583	11.3905	2.00425	7.35853	1.4517	6.11025	7.63012	1.68865	2.79305	6.91348	6.15242	8.07843	7.82031	2.17182	2.55286	1.44417	4.02909	2.46617	9.76152	8.51382	3.46769	2.78593	1.72654	3.72923	4.2884	3.39312
C19	C19B	5.63896	5.24829	5.07647	4.65084	2.93167	3.41001	2.17385	5.68666	5.2511	5.16101	4.851	3.78774	4.78129	5.12377	5.84791	5.96718	4.5952	4.7024	7.31233	7.74174	8.72707	8.80078	12.0963	11.482	2.77596	7.37402	2.10645	5.84185	7.58904	1.40747	1.96714	6.45974	6.74633	7.29514	7.60951	2.4529	1.67748	2.87788	3.47999	3.63417	8.83253	9.46245	3.79598	1.93323	2.54838	3.57187	5.30272	3.60739
C19	C19B	5.00588	4.13735	6.01346	4.35616	2.4624	3.17822	3.1927	5.08617	4.33886	5.97476	3.47014	3.85227	3.62221	3.60082	6.74146	6.96566	3.60872	3.44378	6.69351	6.81681	7.87682	8.10062	10.9431	10.5275	2.43556	6.94586	1.91508	6.0483	7.44627	1.19025	1.41413	5.6097	5.83059	7.85728	7.83987	1.35585	2.13694	1.9817	3.61351	3.61889	7.54855	7.86901	2.70268	2.35341	2.36602	2.90405	3.95603	3.38806
C19	C19B	6.13073	4.851	5.35228	4.91218	2.76843	2.61924	2.7876	5.79685	4.25072	5.39689	4.50672	3.43815	4.44995	3.90474	6.10975	5.82167	4.47822	3.68429	7.80862	7.12263	8.70394	8.99004	10.9858	11.0105	1.65163	7.09352	2.02514	6.07484	7.08044	1.47346	0.72196	6.69027	5.83564	7.10602	7.02728	2.22186	2.19305	2.48141	3.53	3.3828	9.73833	8.23577	4.1404	1.94326	2.44518	2.70374	4.83193	3.79198
C19	C19B	6.18083	5.62506	4.85492	4.98559	3.21656	2.80409	2.43273	5.76774	4.34502	5.43454	4.24559	3.37669	5.31726	4.18909	5.59124	5.69203	5.18354	4.33445	7.55464	7.38547	8.50799	8.62068	11.8288	11.8048	2.14036	7.48665	2.63352	5.66643	7.28336	1.60257	0.730355	6.80577	6.05584	7.92238	7.84185	1.79407	1.87627	2.12061	3.14941	3.62639	9.33774	8.35887	3.95826	1.91666	2.2959	2.96213	4.5986	3.67441
C19	C19B	5.60527	5.57415	5.17472	4.63247	3.02356	2.79913	3.06071	5.41474	4.8038	5.57972	5.10824	3.53036	5.03403	4.38327	6.13043	6.32485	4.49255	4.39427	7.59752	7.11938	8.54834	8.65301	11.5021	10.7346	1.85346	6.70957	1.5627	5.82364	7.01892	1.68657	1.42398	6.75344	6.17938	7.66651	7.82885	1.3433	1.69578	2.52037	3.15075	3.36441	9.17769	8.20963	4.4692	1.56622	2.39298	3.00437	5.09127	3.22346
C19	C19B	6.00344	4.87027	5.88368	5.02128	2.32861	3.12939	3.53661	5.97588	4.76041	5.94415	4.96079	3.75966	4.77168	4.1203	6.97712	6.97528	4.56069	4.06475	7.74879	7.669	8.74076	8.74261	11.4436	11.117	1.89134	7.22208	1.54551	6.44821	7.81298	2.41839	1.66361	6.34096	6.25037	7.87653	8.23708	2.06302	1.61127	2.43174	3.51128	3.53563	9.19234	9.03662	4.12014	1.77905	2.37805	3.42139	5.03995	3.27734
C19	C19B	5.55178	3.17605	7.43699	4.68411	2.63208	2.88563	3.43665	5.10682	4.67877	5.08365	3.81823	3.76437	3.00061	3.91289	7.62503	6.34865	2.63875	3.85681	7.41372	6.05674	9.03734	7.77831	11.154	10.694	2.7835	7.45074	1.57682	6.22955	7.00414	0.297006	1.87202	6.29654	4.67713	7.65246	7.37481	1.70204	2.80952	1.65654	4.90832	2.35687	8.72674	5.87418	3.23509	2.495	1.94767	1.90932	4.1695	2.72871
C20	C20A	4.48168	4.87484	4.27667	4.04198	3.07225	2.08312	3.09827	4.82121	3.99032	5.8545	3.07376	3.33277	4.78505	3.87586	5.17198	6.0292	4.59686	3.71363	5.73194	6.63067	7.84701	7.58795	9.72742	10.1561	1.29102	6.54512	2.24285	5.14773	6.3134	2.02507	0.553216	5.04393	6.14359	6.71113	7.33521	0.970129	2.22947	2.56334	2.02322	3.64485	6.00062	7.88465	2.12541	1.90274	2.16556	3.12718	3.42664	3.69782
C20	C20A	4.51809	6.92138	3.11209	3.96313	3.93969	2.92431	1.93705	4.61092	4.29051	5.94913	4.02109	3.19729	5.93267	4.27064	4.72644	6.14738	5.17199	4.01524	6.09415	6.71824	8.32189	7.93545	11.4428	11.1758	1.38895	7.02666	3.15742	5.12449	6.29802	2.18798	0.95185	6.1689	6.60972	6.82464	7.51926	0.914884	2.47389	3.18085	1.66669	4.4175	6.80017	7.78259	2.74402	1.947	2.72196	2.64481	4.06123	3.96611
C20	C20A	4.56221	4.81234	4.28767	4.09905	2.98557	2.10234	3.08828	4.90623	3.99666	5.78956	3.13177	3.38627	4.72688	3.85179	5.18293	6.01746	4.41447	3.71522	5.7301	6.75474	7.63732	7.56038	9.63175	10.2221	1.21212	6.49822	2.20409	5.15869	6.24102	2.02476	0.65286	4.9904	6.14762	6.69448	7.2188	0.93316	2.07978	2.61162	2.03361	3.62848	6.00684	8.06491	2.15207	1.85934	2.26022	3.11545	3.34522	3.58062
C20	C20A	4.19766	5.19173	3.89974	3.72222	3.43605	2.31782	2.30789	4.42701	5.12439	4.46384	3.31704	3.86364	4.34043	5.34396	5.06537	4.47652	4.02734	4.90742	5.48245	6.53441	6.98806	8.23972	9.92808	10.1909	1.46937	6.32605	2.30684	4.23098	5.0528	1.57694	1.06334	5.37551	6.2845	6.54615	6.57876	1.79434	2.04367	2.52258	2.10951	2.84635	5.96689	7.76815	2.09097	1.99121	1.36572	3.95095	3.54662	3.05705
C20	C20A	5.01111	5.03879	3.96934	4.49506	3.28663	2.81723	1.97662	5.40904	5.11976	4.60371	3.14677	3.54582	4.7573	4.81164	4.84863	5.10053	4.75997	4.41629	6.07166	6.95639	8.06856	8.04589	11.0628	11.2953	2.14073	5.81518	2.29276	4.32369	6.08558	1.76691	1.04389	5.19249	6.29662	6.60864	6.99851	1.35374	2.07855	2.53507	2.37545	3.14603	6.2969	8.31804	2.10037	1.95331	2.13316	3.21177	3.75972	3.43495
C20	C20A	4.14074	4.63977	4.9792	3.46054	2.84456	3.08194	2.11237	3.80865	5.02141	3.82611	3.48791	2.57289	4.71913	4.14673	5.15323	5.33188	4.25112	4.00987	6.41552	4.97668	7.75998	6.55009	10.1644	9.93998	2.60611	5.72681	1.8624	4.38684	6.49582	1.11133	2.08771	6.04748	4.62134	6.86591	6.7244	2.51731	2.69141	2.14987	3.43456	2.08464	7.67644	5.16792	3.09815	2.26832	1.82901	1.78589	3.62446	3.75446
C20	C20A	4.97322	4.1482	5.92925	4.1878	2.63852	2.87443	2.97298	4.74598	4.64252	4.97446	4.60339	2.83405	3.91811	4.06083	6.36681	6.02735	3.6596	3.77888	6.96817	6.06876	8.24436	7.69247	10.3838	10.5093	2.06177	6.98918	2.00655	5.57227	6.87379	1.05956	1.7243	6.09801	5.18567	7.01499	7.1939	2.52046	1.9627	2.68579	3.80929	2.70943	8.25228	6.62602	3.51441	2.01139	2.25071	2.18601	4.87308	3.32081
C20	C20B	4.29166	4.96219	5.22828	3.81561	2.88797	2.41362	3.75852	4.52048	4.00244	6.73137	3.91282	4.25649	4.52218	4.16551	6.00434	7.10497	3.98896	4.33826	6.04218	6.88886	8.07045	8.72921	10.0214	10.0982	1.53037	7.74688	2.22131	6.09119	7.28056	1.45041	1.66218	5.49464	6.43106	7.08274	7.29403	0.868315	2.52473	2.87575	2.55889	4.08478	6.64954	8.15966	2.74125	1.93829	2.23041	3.51151	3.99851	3.39833
C20	C20B	4.35236	5.29506	4.09524	3.87956	2.85768	3.14006	2.3725	4.61374	3.99199	5.96225	3.81372	3.74726	4.40359	3.8483	5.59822	6.1721	3.96136	3.4044	5.84118	6.5506	7.78783	8.03369	10.5236	10.5425	1.74766	6.84921	2.73912	5.26342	6.56541	2.10822	0.588537	5.16831	6.05537	6.44424	6.91545	1.23517	2.28215	2.68651	2.27136	4.15366	6.34	7.77569	2.51518	1.82243	2.05752	3.25663	3.78795	3.11117
C20	C20B	5.1204	4.37316	4.83045	4.09068	2.18562	2.71927	2.44786	4.83772	3.86363	4.83189	3.95672	3.07728	4.11823	3.57438	5.47588	5.55001	4.62846	3.55974	6.76757	6.29721	8.82652	7.59486	10.3471	9.26907	2.32528	6.40903	1.46627	5.49045	7.1033	1.4229	1.45503	5.89137	5.19091	6.0055	6.29452	2.46042	2.49923	2.38223	3.2024	3.08214	8.47174	7.37101	2.17867	3.26955	2.31387	2.42253	4.77486	3.83893
C20	C20B	4.16755	5.47909	3.79653	3.73771	3.68467	1.7277	2.90657	4.50707	5.31553	4.71575	3.53381	3.68319	5.72212	5.41678	4.61864	4.80311	5.21975	5.21781	5.63564	6.6428	7.54902	7.87286	9.5289	9.97396	0.96724	5.83387	1.79249	4.34454	5.23557	2.28051	0.975408	5.54771	6.67174	6.56701	7.19899	0.72877	2.18076	2.60805	1.77842	2.79449	6.06165	8.0104	2.18449	1.99799	2.53377	2.99377	3.6221	3.33892
C20	C20B	4.19254	4.03051	5.40759	3.60372	2.30251	2.82403	2.98603	4.1472	3.57034	5.76569	3.33821	3.08079	3.69271	3.41591	5.98787	6.31005	3.76175	3.39955	5.95764	5.92261	7.42483	7.53162	9.50626	9.9937	1.98865	7.6966	2.78678	5.62897	7.02755	1.15286	1.35926	5.30943	5.19785	7.00074	6.94461	1.34719	2.1713	2.41614	3.20764	3.51509	6.8869	6.7527	2.4856	2.28386	2.75881	1.91767	3.9062	3.65852
C20	C20B	5.32334	4.85306	4.07004	4.46639	2.74944	2.86609	1.87111	5.55903	3.77699	5.54118	3.91949	3.05763	4.11942	3.72494	5.10921	5.59964	3.87667	3.63847	6.51875	7.20628	8.34504	9.15234	10.7033	10.8111	1.91643	7.10206	2.60805	5.61075	6.77586	1.47835	0.178384	5.54296	6.23015	5.89407	6.61194	1.25372	2.16716	3.3594	2.68587	4.20205	7.6451	8.96536	2.92138	1.86754	2.66481	2.95094	4.17416	4.26519
C21		5.39018	5.06751	5.38081	4.68589	2.24389	3.31234	3.5269	5.68864	4.54312	6.48375	4.06838	4.4854	3.96861	4.89314	7.15698	7.03249	3.77431	5.13364	6.98191	7.80349	8.37399	9.25818	11.0627	10.9947	1.58999	7.8945	1.98633	6.37008	7.21246	2.38473	2.2356	5.63573	6.63688	7.74203	7.82284	0.863824	2.00791	2.53996	2.90048	4.09658	7.83977	9.46532	3.0223	2.15139	2.71432	3.53013	4.19779	3.4037
C21		4.93376	4.37582	7.34479	4.22453	2.18048	3.59895	4.25635	4.87781	4.61721	6.97049	4.60639	3.97593	3.35461	3.86675	8.83689	8.07917	3.33897	3.99344	7.70949	6.86303	8.90441	8.7715	10.4735	11.3857	1.49787	8.7375	2.60325	7.29085	7.79513	2.01673	1.67881	6.6429	5.99516	8.60206	8.73064	1.07842	2.58097	2.44296	4.41011	3.81325	9.00122	7.85122	4.6149	1.72002	2.24532	3.281	4.80654	3.89073
C21		5.4586	4.87793	6.60648	4.5637	2.22836	3.30086	4.0724	5.20073	4.41846	6.52341	4.7111	2.858	4.622	3.89276	7.87545	7.47874	4.7377	4.17408	7.61198	7.11507	8.87604	8.90119	10.7221	11.3036	1.46928	8.14389	2.25866	6.75802	7.73981	2.53118	1.67237	6.58182	5.80321	8.27568	8.82446	1.90803	2.294	3.02988	3.84909	3.59214	9.08817	7.95403	4.25607	1.90423	2.9599	2.43179	4.9911	4.50907
C21	C21	5.21859	4.16101	6.75162	4.57818	2.78702	2.55068	4.23577	5.19174	4.91686	5.93963	4.5935	4.01644	4.0538	4.67494	7.26652	6.849	4.04613	3.5281	7.14404	6.68939	9.05847	8.22553	11.0273	10.6566	2.24621	7.3149	1.52907	6.08344	7.73015	1.48571	1.99936	6.03898	5.72863	7.67378	7.81817	1.1672	2.3437	2.39132	3.71994	2.90737	7.9909	7.32759	3.02372	2.38314	1.89002	3.07055	5.03723	2.68811
C21	C21	4.40223	4.5595	6.65084	3.75318	2.24975	3.52652	3.78125	4.29653	4.22818	6.71297	4.46245	3.39024	3.90877	4.08198	7.8947	7.46313	4.0214	4.23358	7.0984	6.38187	8.54945	8.21146	11.1423	10.1458	2.67966	8.37789	2.19492	6.74777	8.37327	2.02222	1.83415	6.36171	5.69907	8.06678	8.05813	2.92287	2.49147	3.0653	3.99789	3.83603	8.32639	7.25366	3.47039	2.50981	2.6736	2.53987	4.81768	4.25192
C21	C21	4.88234	4.16309	6.76337	4.02817	1.82921	2.635	4.55066	4.71605	3.73723	6.81709	5.07075	3.05516	3.64202	3.98662	7.77964	7.45569	3.70748	4.56054	7.54503	6.64573	8.73154	8.19009	9.70385	9.65748	1.2252	8.81599	1.83792	7.37305	8.02519	1.76458	2.11462	6.54889	5.68044	7.84397	8.29018	1.84561	1.89847	2.77986	4.02776	3.70052	9.13961	7.73953	4.39115	1.92603	2.533	2.82125	5.44018	3.93456
C21	C21	5.19807	4.33978	6.36388	4.27859	2.18319	3.22405	3.40306	4.89591	3.90226	6.17921	4.91913	3.89651	3.98567	3.54494	7.43689	6.71534	3.89895	3.17892	7.33014	6.60208	8.37196	8.53708	10.3565	11.0365	1.77985	8.41973	2.77371	6.62035	7.73675	2.06185	1.02219	6.39863	5.42423	7.3732	7.22478	1.67326	2.06306	2.27947	4.02402	3.63479	8.90418	7.40841	4.13764	1.85612	1.96323	3.02352	4.98307	2.82908
C21	C21	5.43684	4.72864	5.79093	4.6424	1.78844	3.30665	3.88735	5.28742	3.67976	6.55071	4.52808	2.95923	4.41374	3.33429	7.35968	7.46016	4.26417	4.40971	7.18965	6.73688	8.23735	8.8417	10.4455	10.7146	1.29419	7.58382	2.30394	6.20218	7.13833	2.77283	1.74116	5.76725	5.20581	7.90736	8.15396	1.04359	1.59628	2.42158	3.1981	3.64418	8.31964	7.41278	3.67999	1.81131	2.53242	2.35911	4.5769	3.25331
C21	C21	5.52518	4.89062	7.37959	4.64712	2.78262	2.95573	4.58188	5.21362	4.72338	6.85492	5.29859	3.74351	4.87063	4.36595	8.03442	7.72829	4.50956	4.25912	7.95539	7.14784	9.14185	8.5349	12.4501	10.8956	3.05905	8.19319	1.52928	7.10148	9.49154	1.97629	1.809	7.1138	6.02269	9.11752	9.16055	2.29639	1.91774	2.29739	4.2591	3.51353	9.44638	7.79546	4.34881	2.17593	2.48133	2.89921	5.43432	3.25878
C21	C21	5.74749	4.61373	6.09216	4.82771	2.02726	3.00654	3.95879	5.42657	3.69902	6.40908	3.99933	3.2361	3.74144	3.36653	7.55972	7.13468	3.40114	3.62583	7.36753	6.85276	8.36205	8.39372	10.448	10.8726	1.22354	7.70931	2.23429	6.26292	6.87773	2.11822	1.45147	6.03823	5.15746	7.97892	7.91905	1.61732	2.25366	2.17864	3.43774	3.46845	8.68605	7.34382	3.78086	1.87138	2.69816	2.09728	3.91123	3.65048
C21	C21	5.12178	3.77401	6.95124	4.33072	1.97923	2.70974	4.37977	4.93866	3.92889	6.41291	3.0332	3.48256	3.47207	3.74708	7.7316	7.24938	3.84441	4.15896	7.21238	6.56189	8.72624	8.38291	10.5352	9.65201	2.14616	7.8184	1.37755	6.79857	8.15292	1.61671	1.86448	6.07925	5.33033	8.27393	7.87749	1.36409	3.33695	2.23967	4.01464	3.31149	8.50198	7.30374	3.74992	2.00633	2.24561	2.70692	3.58452	4.79749
C22	C22A	5.90111	3.77418	6.98666	4.90394	2.43974	3.47179	3.03095	5.39722	3.99742	5.84457	4.11128	3.0922	3.4422	3.34255	7.42179	6.74598	3.14721	3.45803	7.76594	6.37579	9.12923	8.45342	11.9175	11.4711	2.97141	8.04934	2.64224	6.34675	7.93681	0.802155	1.32482	6.47948	4.76558	7.73667	7.46764	1.98615	2.66	2.1795	4.78183	3.3341	9.3042	6.32881	3.60601	2.4034	2.25099	1.84215	4.36365	3.64349
C22	C22A	5.70033	5.29345	5.67609	4.64826	3.31069	2.84686	2.78742	5.40686	4.93916	5.46564	3.82787	3.35926	4.91284	4.67837	6.36674	5.87936	4.89824	4.38881	7.74991	7.17406	9.32035	8.93044	11.5664	11.7327	2.10826	7.83575	2.48051	6.07872	7.4186	1.41548	0.954222	7.10679	6.3148	8.0235	7.66116	1.53629	3.05214	3.00469	3.7399	3.40906	9.50141	8.22706	3.30524	2.94937	2.93769	2.47868	4.37056	5.20362
C22	C22A	5.1562	5.46225	4.69561	4.61005	3.4163	2.30179	3.36385	5.19337	2.05157	8.17952	4.10693	3.45426	5.04994	2.18058	5.35397	8.05698	4.05559	2.63491	6.43589	6.63377	8.15937	9.31544	11.12	10.9823	1.54018	7.23784	3.52229	6.62065	8.04593	1.24668	0.193713	5.67022	5.83924	7.23877	7.38759	1.26862	2.09009	2.69634	2.24927	5.4297	6.80053	7.16162	2.59745	1.9187	1.91619	2.8342	3.99203	2.75465
C22	C22A	5.75201	5.28636	5.38592	4.68018	2.94646	3.44026	2.29689	5.18896	4.11853	5.50907	5.52896	3.23648	4.65116	3.70665	6.36008	6.00524	4.07799	3.6029	7.71853	6.30471	9.45573	8.61489	11.6543	11.805	2.1683	7.2789	3.10611	5.54144	6.85095	1.57553	0.774388	6.84264	5.11933	6.62171	6.88089	1.23782	2.40687	2.58818	3.7525	3.58532	9.48172	6.46536	3.6571	2.50437	2.46679	1.73731	5.43957	2.72584
C22	C22A	5.35666	5.40865	5.54208	4.44584	3.5226	2.914	2.65213	4.9504	4.70032	5.41989	4.29937	3.12078	5.19431	4.16704	5.84084	6.12028	4.13279	4.02922	7.46629	6.37017	8.80847	8.02066	11.9994	11.2998	2.6696	6.83607	2.32798	5.48241	7.43104	0.727676	1.1052	7.0124	5.71258	7.59666	7.61083	1.74557	2.81069	2.559	3.63565	3.2704	8.98667	6.74	3.88149	2.16257	1.98338	2.54458	4.05175	4.05267
C22	C22A	5.86534	5.28309	6.26166	4.65218	2.48858	3.22077	3.44753	5.17995	4.16201	6.03368	4.97378	2.75385	4.57591	3.67422	7.47703	6.84805	4.17871	3.49355	8.51687	6.3904	9.46965	7.97725	11.6599	10.7383	1.99107	7.72014	2.04543	6.48308	7.54432	1.96459	1.42137	7.50543	5.08504	7.93621	8.00576	1.53334	2.84613	2.52216	4.12883	3.28521	10.7063	6.6595	4.63515	2.46602	2.54844	1.87766	4.87028	4.44918
C22	C22A	4.63583	4.1347	5.81517	3.85903	2.4915	2.68656	3.10456	4.27192	4.07568	5.09313	3.45724	2.64176	3.84139	3.75554	6.4173	5.84884	4.0816	3.53353	6.65257	5.57814	8.2819	7.19379	10.1805	9.59737	2.27145	6.84201	1.86058	5.41264	6.88567	1.30132	1.51098	6.00939	4.69409	7.18701	7.03443	1.77773	2.78329	2.32069	3.63913	2.66807	7.98799	5.86046	2.57665	2.87261	1.88976	2.10829	4.05989	4.13851
C22	C22A	4.93918	5.24982	5.05341	3.85994	2.33898	2.87021	2.84272	4.26222	3.03062	5.86046	5.16125	3.2991	5.07396	2.41227	5.45573	6.7602	4.10586	2.73535	7.25262	5.60577	8.65561	7.68729	10.3572	9.44177	1.963	6.63649	2.27912	5.80417	7.41228	1.12421	1.28536	6.71245	4.56022	6.14423	6.06257	1.93017	2.65451	2.56021	3.27736	3.5517	9.22392	5.8763	3.8173	2.41769	1.56613	2.40691	4.73031	2.98774
C22	C22B	6.1579	4.16157	6.25769	5.3459	2.46923	3.32568	3.25043	6.02115	4.30007	5.88779	4.24931	3.3285	3.3808	3.68349	7.30126	6.73841	3.81833	3.78507	7.47835	7.072	9.89193	8.94837	12.0318	11.5032	2.53097	6.98665	1.98974	5.81873	6.98499	1.45424	1.29936	5.75464	5.27492	7.28989	7.63717	1.59664	2.34652	2.37817	3.80654	3.3433	8.28587	7.40036	3.14164	2.06808	3.22067	1.43173	5.09421	3.15294
C22	C22B	6.20953	4.3486	6.52442	5.41338	2.79523	3.3047	3.37902	6.15584	4.20308	6.57593	3.64809	3.58985	4.36593	3.75745	6.50721	7.60227	3.98988	3.84604	7.65894	7.39698	9.6533	9.25639	12.5297	12.2261	2.77063	8.16166	2.71015	6.32814	7.98494	0.0306104	1.8735	6.05198	5.80813	8.11281	8.03684	1.87376	2.67829	2.54303	3.95987	3.93091	8.46024	7.97201	2.88402	2.51117	3.04761	2.03326	4.46772	4.0276
C22	C22B	4.96198	4.09452	4.80802	4.20279	2.88379	2.35701	2.29962	5.47307	4.97434	4.84516	3.62438	4.24321	3.65917	4.77775	5.3477	5.16946	3.43365	4.26729	6.36532	7.52515	7.916	8.80582	9.75983	10.5766	1.66055	7.03728	2.02183	5.67058	6.37686	0.835301	0.836228	5.55828	6.90238	6.20011	6.44054	1.08582	2.10554	2.7709	3.11829	3.40497	7.41843	9.74807	2.67922	2.09981	2.61445	3.6481	4.02743	3.77307
C22	C22B	6.50106	4.41715	6.07262	5.12905	2.47999	2.95241	2.84356	5.64074	3.47512	5.62649	4.66611	2.98818	4.16537	3.18451	6.61554	6.03588	3.66682	3.29944	8.04869	6.52503	9.38951	8.05523	11.6465	11.3501	2.38546	8.0124	2.80034	6.08446	7.71843	1.28443	0.791553	6.80932	4.6183	7.01373	6.96081	2.41879	2.46485	1.92297	4.16395	3.30142	10.1991	6.38392	3.64417	2.6526	2.3403	1.61441	4.60011	3.21275
C22	C22B	5.82762	5.12626	4.93349	4.91424	3.13904	3.05775	2.28629	5.63098	4.09755	5.62277	5.04308	3.61292	4.55851	3.88503	5.7115	5.89891	4.09038	4.03195	7.70352	6.48684	9.34572	8.87228	11.8631	11.7616	2.10803	7.4769	3.14687	5.45961	6.80465	1.23439	0.599907	6.43944	5.52663	6.59438	6.73175	2.29084	2.21017	2.41786	3.32295	3.73514	9.07361	6.99435	4.09892	1.64816	2.22009	2.2094	5.24752	2.48557
C22	C22B	4.45766	4.04108	5.17965	3.83769	2.3928	2.79423	2.75129	4.3327	2.83898	6.12327	3.75097	2.33928	3.37466	2.91369	6.11069	6.05232	3.22472	2.78976	6.03043	5.68878	7.36131	7.58546	9.65433	10.0092	1.89141	7.26437	3.05093	5.56165	6.7371	1.35305	0.141413	5.24956	4.81515	6.67516	6.9413	1.24396	1.80524	2.67877	3.13254	3.90799	6.91954	6.21047	3.12002	1.54516	2.31858	1.87305	4.05495	3.47016
C22	C22B	4.18479	4.24293	5.92333	3.68166	3.07705	1.92014	3.94679	4.01588	4.46374	5.29217	3.38879	2.96883	4.02688	4.44774	6.28462	5.90361	4.14549	4.32035	6.12988	5.3118	8.40773	7.28528	9.59838	9.25676	1.73282	6.29319	1.52055	4.94305	6.15377	0.894302	1.74779	5.75624	4.9405	7.44678	7.25452	1.7524	2.64455	2.41794	3.10627	2.27993	6.89069	5.43305	2.15954	2.72324	1.97146	1.878	4.27525	3.52141
C22	C22B	4.61709	5.12885	5.13163	3.76269	3.01022	2.44715	2.90438	4.18978	4.71151	4.59936	3.49389	2.76785	4.66759	4.15834	5.89112	5.46541	4.54769	4.03302	6.95395	5.63491	8.8602	7.36367	9.73379	9.78749	1.29736	6.01105	1.5805	4.9978	5.70633	1.38735	1.40963	6.62634	5.11833	7.24181	6.93667	1.49715	3.32894	2.59915	3.21527	2.38611	8.52406	6.03788	3.4702	2.40857	1.39401	2.78077	3.8887	4.81712
C22	C22C	6.4233	6.03013	4.53787	5.44451	3.75204	2.53766	2.66793	6.22062	5.51423	4.72031	4.40966	2.77335	5.86212	5.27764	5.34214	5.3304	5.66465	5.44128	7.91646	7.26609	9.75105	9.2243	12.3799	12.1797	1.72505	6.1479	1.94536	4.70031	6.0804	1.91732	1.45814	6.78925	6.17214	7.31307	7.89383	1.97044	2.47489	2.95721	2.70414	2.69056	9.15587	7.82145	3.58361	2.1181	2.92457	1.94018	4.81313	4.22951
C22	C22C	5.73974	4.41921	6.55078	4.75896	2.80127	2.58083	3.71338	5.22678	3.82595	6.16366	4.07716	3.82884	4.21527	3.35622	6.7771	6.8482	3.91237	3.27404	7.66843	6.38158	9.62443	8.38011	11.2401	10.6659	2.10288	7.50599	2.06231	6.21451	7.35711	0.404412	1.15316	6.69318	5.03702	7.718	7.19423	2.05463	2.97892	2.15387	4.01636	3.20445	9.22238	6.41369	3.48225	2.57348	2.34425	1.86638	4.66608	3.30692
C22	C22C	5.37729	4.59049	5.17167	4.15278	2.7152	3.12426	1.69968	4.78163	5.3722	3.3086	4.79115	3.77248	4.45666	4.46415	5.50727	4.88596	4.51181	4.11508	7.35861	6.07283	9.60547	7.66822	10.3134	10.6201	2.04435	6.19886	1.66264	5.05197	6.16833	1.02164	2.14359	6.72241	5.13325	5.81731	5.74068	1.93349	2.69704	2.20119	3.99226	2.03214	9.49137	6.80197	3.39525	2.73104	2.18651	2.21696	5.32444	2.90506
C22	C22C	5.61322	5.55756	4.63394	4.48893	3.56634	2.70181	1.88207	5.02273	3.70403	5.41535	4.6055	3.46046	5.50585	3.50563	4.70409	5.64128	4.58883	3.42661	7.381	6.25432	9.13653	8.37643	11.3	11.8773	2.20352	7.41003	3.68604	5.33655	7.23959	0.311574	0.406444	7.0022	5.5013	6.50126	6.31141	2.09535	2.63579	2.41609	3.29481	3.85325	9.23121	6.61118	3.47245	2.48045	1.92142	2.34189	4.68447	3.19007
C22	C22C	4.91054	3.86661	5.67609	4.19759	3.43472	2.45532	2.26717	4.75838	5.08853	4.15846	3.92812	3.52946	3.75845	4.83959	5.79254	4.72594	3.50414	4.38201	6.54399	5.99993	8.47448	8.00953	10.7394	10.8354	2.66748	7.00012	2.20537	5.04509	6.28633	0.224981	1.28956	6.04819	5.52626	6.38275	6.36532	1.90421	2.53231	2.38323	3.92833	2.39807	7.56879	6.52837	3.25446	1.74407	2.00552	2.30658	4.49568	2.96542
C22	C22C	4.62733	4.35261	6.52431	3.88874	3.1326	2.80031	3.20788	4.23902	4.53047	5.43369	4.96221	3.41641	3.83656	4.07523	7.19201	6.00096	3.32474	3.25635	7.04105	5.57274	8.66322	8.12667	10.8094	10.3198	2.48909	7.12213	2.04608	5.72072	6.8675	1.06304	0.901601	6.66546	5.0633	6.96749	6.887	2.26983	2.78156	2.907	4.19949	2.80395	8.37774	5.67896	4.00007	1.8793	2.28101	1.70338	4.88721	3.0913
C22	C22C	6.11292	4.42116	6.06855	4.90294	2.9302	2.5076	2.9756	5.42441	3.84594	5.46229	4.71353	2.5948	4.17719	3.568	6.36309	5.84662	2.88068	3.5568	7.69214	6.53882	8.95523	8.60155	11.4921	10.8437	2.43264	7.47197	2.15573	5.96717	7.3473	0.574199	0.765915	6.79256	5.06175	6.92002	7.1325	1.48837	2.42865	2.60959	4.02274	3.11185	9.58142	6.65218	4.05631	2.0074	2.05026	2.155	4.18341	3.79595
C22	C22C	5.33772	4.68934	6.11624	4.58238	3.70303	2.73173	2.84174	4.97407	4.97741	5.09201	3.44467	2.61363	4.61292	4.41896	6.201	5.81569	4.29568	4.29478	7.09217	6.11313	8.93518	8.02196	11.8157	11.6275	2.81192	6.81352	2.31583	5.14855	7.04653	0.225107	1.1173	6.62223	5.42839	8.07068	7.9284	1.22006	2.88838	2.463	3.93423	2.72942	8.15084	5.98166	3.03862	2.42117	1.93816	2.07204	4.1366	4.31165
C22	C22D	5.84496	5.08433	6.13799	4.90067	3.13508	2.68719	3.58702	5.39943	4.39869	5.96822	5.45645	3.0012	4.56738	4.23599	7.21592	6.16722	4.26979	3.90659	7.83725	6.55398	9.20383	8.53894	11.4737	11.5688	1.7439	7.71173	2.53399	5.85671	6.96826	1.94745	0.464645	6.87274	5.36347	7.8538	7.97836	1.4271	1.84307	2.47118	3.69073	3.10245	9.30147	6.61836	4.50879	1.6079	2.35265	1.99986	5.60637	2.74466
C22	C22D	5.92236	3.60681	8.19448	4.70557	2.9526	3.62243	2.80161	5.00746	5.21019	4.76801	4.50591	2.88258	3.30584	4.07685	8.60244	6.33069	2.92771	3.86142	8.5269	5.84506	9.93903	7.75672	12.4269	11.8143	3.42373	8.5102	2.13337	6.91136	8.10454	0.805984	2.00664	7.7272	4.53145	8.24499	7.72326	1.36176	3.4043	2.07787	6.19746	2.34807	10.7071	5.17986	3.76905	3.36081	1.79825	1.65416	4.56291	4.09957
C22	C22D	5.25327	4.38701	7.36114	4.73167	2.53757	2.93502	5.10908	5.31125	3.94637	7.93145	3.77531	3.73264	3.76022	3.43945	8.2023	8.77955	3.33651	3.64628	7.01831	7.11688	9.34658	8.89182	11.2359	10.9711	1.96701	7.99037	2.02464	6.81498	8.01595	1.2996	1.48617	5.73739	5.92485	8.70667	9.07025	1.45958	2.91472	2.69961	3.56535	4.07681	7.46575	7.72893	3.19572	1.96502	2.3115	3.03059	3.9601	4.08406
C22	C22D	5.72019	5.95314	4.98252	4.75951	3.90988	2.67297	2.51623	5.29426	5.34699	4.77439	5.14718	3.31593	5.72419	5.01216	5.63699	5.25602	5.48984	4.69987	7.7471	6.47236	9.63651	8.97955	12.0316	11.9112	2.07276	6.52801	2.32953	4.85705	6.43306	1.60168	0.957049	7.23158	5.89768	7.2578	7.24384	1.75339	2.3725	2.78914	3.21571	2.73696	9.28567	6.70492	4.15943	1.95772	2.58621	1.82518	5.59959	3.17608
C22	C22D	4.97402	5.45642	4.82108	4.33455	3.40604	2.39885	3.15132	4.77098	4.55587	5.30211	3.83725	3.01163	5.08738	4.46705	5.65196	5.72487	4.97649	4.72171	6.43333	6.18552	8.35899	8.59847	10.9864	10.5755	1.823	6.27706	2.0771	4.62559	6.08307	1.6717	1.31278	5.98661	5.44186	7.39911	7.36448	1.23762	2.24638	2.6067	2.52617	2.82885	7.19644	6.40948	2.81807	2.03334	2.847	1.47256	4.37382	3.32349
C22	C22D	4.98711	4.4484	5.85176	4.1835	3.50401	2.75722	2.3792	4.74371	5.09533	4.70211	4.04958	3.33644	4.21871	4.7746	6.13528	5.23212	4.11948	3.80631	7.19816	6.05125	8.92944	7.76663	11.3466	11.1423	2.73376	7.43354	2.44373	5.45837	6.96681	0.58034	1.10409	6.69822	5.7204	7.18348	7.00733	2.19182	2.72647	2.53956	4.10471	2.80015	8.57411	6.61071	3.51316	2.26431	2.05095	2.40448	4.69585	3.81739
C22	C22D	6.12716	3.59614	6.67516	4.92154	1.98883	2.96847	3.29295	5.53343	3.70874	5.56725	4.43486	3.2964	3.25401	2.95861	7.19275	6.58878	3.012	3.08605	7.56898	6.74668	9.07227	8.4058	10.9459	10.459	2.34545	7.42661	1.73922	6.54043	7.73286	0.994982	1.40112	6.27004	4.84876	6.95238	6.87133	1.36888	2.3576	2.15419	4.40232	3.11848	9.4045	7.14992	3.73754	2.15762	2.02198	2.45896	4.57107	3.29274
C22	C22E	6.07533	4.76733	6.24421	5.01706	3.15848	2.18968	3.74526	5.55081	4.14957	5.91127	3.78188	2.81446	4.62385	4.01973	6.50077	6.26164	4.52492	3.75082	8.10413	6.512	9.98381	8.31423	11.8719	10.8575	2.28714	7.74303	2.08757	6.05464	7.78178	0.807211	1.06577	7.02542	5.28787	7.98928	7.70757	1.662	3.30212	2.54599	3.83203	2.95759	9.79129	6.52753	3.32774	2.98271	2.10675	2.10458	4.43845	4.81821
C22	C22E	5.56133	5.23994	4.796	4.74238	2.75476	3.39503	2.40828	5.14388	3.5062	5.77641	4.0219	3.18089	4.49018	3.19234	5.93596	6.21152	4.32507	3.38109	6.91822	6.07905	8.8109	8.2614	11.7382	11.2708	2.27172	6.75718	3.08337	4.90298	6.55703	1.70332	0.813578	5.84366	4.60285	7.0341	6.91954	1.54012	2.2533	1.99068	2.98672	3.69991	7.94334	5.79762	3.03479	2.07653	1.37036	2.36051	4.42326	2.51007
C22	C22E	3.79514	4.3846	5.25737	3.43697	3.34385	2.62756	2.76059	3.83509	4.28253	5.46095	3.27964	3.57298	4.13142	4.04185	5.64189	5.7631	3.63716	4.10144	5.43884	5.42572	7.7665	8.20983	10.1987	10.2628	2.60455	6.61831	2.74395	4.65539	6.72798	0.854496	0.606331	5.32591	5.42206	6.78654	6.66066	1.20947	2.72553	2.68656	3.01712	3.20732	5.82522	5.90034	2.29229	1.88862	2.01763	2.21626	3.53548	3.1558
C22	C22E	5.63507	5.64133	5.02818	4.61329	3.68061	2.67846	2.37581	5.07786	5.16615	4.44833	4.92477	3.17318	5.41645	4.80232	5.62528	5.0374	5.0271	4.50111	7.48033	6.27924	9.83476	8.39219	11.8241	11.4248	2.36917	6.32979	2.087	4.7492	6.47692	1.48038	1.15085	7.07117	5.51786	6.63123	6.82636	1.69774	2.86999	2.77784	3.33568	2.5287	9.12599	6.38411	4.09582	1.87951	2.21728	1.96208	5.12171	3.46073
C22	C22E	5.31867	3.45967	6.19656	4.3899	2.83227	2.02646	3.11129	4.83085	4.29867	4.47191	3.61016	3.39315	3.38351	4.15979	6.27559	5.15315	3.09424	3.92995	6.80354	5.88483	8.46722	8.14857	10.0769	9.79735	2.1425	6.78518	1.46575	5.47038	6.20313	0.136711	1.61702	6.05137	4.71568	6.56836	6.07446	1.86373	2.8468	2.22823	3.97684	2.15467	8.20279	5.93869	2.98309	2.30699	2.16759	1.66184	3.97406	3.24098
C22	C22E	4.49307	2.89396	6.89053	3.78475	1.90592	2.51541	3.82066	4.26431	3.12217	6.16414	3.26204	2.93216	2.73663	2.88844	7.20522	6.6213	3.56679	2.55533	6.38462	5.81217	8.56411	7.16797	10.0309	9.0287	2.87285	7.96718	1.88593	6.5631	8.55208	0.829555	1.01618	5.5424	4.7481	7.20836	7.05612	2.88648	2.66078	2.26789	4.17359	3.32141	7.56384	6.37631	3.13353	2.06034	2.19846	2.17127	4.43042	4.03799
C22	C22E	5.18787	5.33834	5.92674	4.44686	3.26226	2.77736	3.61641	4.93732	3.75295	6.96809	4.07317	2.7868	4.91708	3.41811	6.51226	7.35321	4.20619	3.16301	7.27658	6.47095	8.89418	8.14745	11.2966	11.2556	1.81971	7.49552	2.85771	6.19684	7.53294	1.08557	0.608337	6.63956	5.70298	8.19781	8.3604	1.07224	2.71607	2.94895	3.37558	4.03812	8.43172	6.84635	3.51512	2.25795	2.23485	2.45963	4.19466	4.53233
C23		5.81241	5.12736	5.17233	5.08514	2.48479	3.09069	3.43548	6.02137	3.44187	7.22809	4.36438	4.09112	4.06735	3.16413	6.60075	7.65885	3.4184	3.99213	7.31577	7.45177	9.19842	9.90664	11.1148	11.8809	1.15144	8.13341	3.13881	6.57176	7.23497	1.86474	0.90867	5.68731	6.11923	7.06367	7.3046	0.891066	2.41826	2.8486	2.7934	4.64906	8.07723	8.67399	3.47994	1.68439	2.6539	2.89145	4.2077	3.29837
C23		5.28761	4.47609	5.72368	4.6395	2.59046	2.60574	3.75338	5.41694	4.0709	6.37836	3.95219	4.14882	3.94716	3.80051	6.68641	6.82092	3.65485	3.75213	6.62508	7.24062	8.05287	9.12047	10.5407	10.719	1.64444	7.26614	1.93018	6.05547	7.15588	1.65618	0.988248	5.46941	6.05387	7.49768	7.48656	1.64886	1.93888	2.34742	2.98406	3.75066	7.2668	8.35589	2.76387	2.02267	2.39333	3.11149	4.10903	2.84298
C23	C23	5.16304	4.45132	5.31348	4.63229	2.71373	2.58146	3.46582	5.60048	3.9088	6.68333	3.64023	3.84852	3.64746	3.76216	6.34088	6.90243	3.43057	3.51991	6.45863	7.39694	8.57573	8.93063	10.5425	10.8556	1.55631	7.56175	2.26692	6.15165	7.01268	1.38408	0.623457	5.16816	6.46665	6.9733	7.44488	2.17082	2.31016	2.9825	2.72648	4.24323	6.78212	8.91547	2.48399	1.96776	2.46646	3.36953	4.02119	3.73735
C23	C23	5.04568	2.94745	7.29955	4.44316	2.55384	2.8371	3.63245	5.03137	4.06761	6.15035	2.7085	3.5253	2.81452	3.55427	7.43754	6.815	2.40692	3.01836	6.59782	6.52078	8.53042	8.19615	10.8389	10.459	3.00878	7.6925	1.93769	6.4227	7.51624	0.198183	1.03702	5.49568	5.42293	7.78568	7.40509	1.5353	3.31243	2.55134	4.45202	3.39559	7.26853	7.13347	2.61923	2.25478	1.8375	2.94458	2.9461	4.58
C23	C23	5.14562	5.16268	4.17271	4.52419	2.45119	3.19862	2.55815	5.80989	4.84156	5.69898	3.49137	4.15848	3.97121	4.5866	5.79281	6.55643	3.43576	3.83732	6.29071	8.07602	8.41453	9.35371	10.5187	11.0246	1.25848	6.67741	1.97911	5.61648	6.22662	2.01601	1.87807	5.04802	7.08537	6.19687	7.27673	0.862492	2.87526	3.12866	2.26375	4.05318	6.8225	10.3351	2.4395	1.96101	1.96811	4.69507	3.07284	4.59525
C23	C23	4.63448	4.64866	5.44634	4.05647	3.05011	2.72192	3.06393	4.70689	4.24475	6.00798	2.93314	3.49274	4.15017	3.84946	6.02875	6.5474	3.4676	3.45315	6.51324	6.43079	7.72148	8.15509	10.7472	10.2208	2.1389	6.80657	2.02223	5.69849	6.87121	0.843326	0.963865	5.8391	5.94855	7.65508	7.51142	1.45769	2.99335	2.55145	3.1799	3.66828	7.33856	7.37883	2.45569	2.57428	2.33803	2.72021	2.85338	4.51671
C23	C23	4.59309	4.81362	5.26095	3.95822	2.97456	2.86888	2.83858	4.59616	4.26148	5.81983	3.02296	3.61993	4.32383	3.77514	5.83533	6.53815	3.53301	3.41602	6.45615	6.48291	7.70093	8.10315	10.7607	10.1203	2.23008	6.66321	1.94655	5.64713	6.88091	0.841531	1.22314	5.90931	5.92881	7.55256	7.22743	1.62537	2.9626	2.59641	3.15973	3.67253	7.43045	7.47034	2.40557	2.69812	2.33435	2.80228	2.88701	4.46467
C23	C23	5.26399	5.09415	5.10909	4.79319	2.81729	3.19677	3.27661	5.78381	3.9667	7.24411	3.77552	3.89883	4.13288	3.70504	6.46317	7.65496	3.81197	3.27718	6.73739	7.50397	8.83785	9.0715	11.4953	11.6097	1.72934	7.77873	2.81531	6.3244	7.49341	1.83906	0.932066	5.27768	6.67315	7.40717	7.88036	1.62136	2.35543	3.24205	2.6252	4.79221	6.92071	9.01776	2.88843	1.68265	3.02825	2.92263	4.06541	3.90935
C23	C23	5.20663	4.24632	5.97409	4.4758	2.69517	2.87615	3.21452	5.22832	3.85022	6.41279	4.08686	3.95292	3.76739	3.51651	6.52478	6.90088	3.04143	3.80391	6.84603	6.97231	8.48356	9.26088	10.6575	11.1413	1.99377	8.01609	2.69661	6.37666	7.31832	0.78504	0.949617	5.85936	5.96702	6.92535	7.08775	1.10582	2.66237	2.71569	3.59795	4.02863	7.84044	8.04843	2.77788	2.41907	2.64126	2.69663	3.98387	3.56622
C23	C23	5.62132	4.18472	5.51469	4.71132	2.42134	2.50679	3.2011	5.71289	4.68477	5.17264	4.11691	4.41407	3.76811	4.36001	6.40643	5.82713	3.30546	3.90256	7.23523	7.14911	8.54661	8.81465	10.4575	10.2329	1.65566	6.79216	1.27867	5.94612	6.871	1.64399	1.37115	5.90053	5.99851	6.52671	6.55973	1.0991	2.48464	2.23783	3.37254	3.06739	8.55882	8.60962	2.98133	2.43817	2.55873	2.89239	3.85677	3.11275
C24	C24A	6.54308	3.48512	6.80623	5.59284	2.36852	3.1415	3.28673	6.28339	4.42412	5.45877	3.91682	3.59861	3.29125	3.64573	7.05306	6.72094	3.31738	3.69654	7.71943	7.19404	9.33206	8.82094	12.2161	11.6025	2.99558	7.27615	1.77887	6.09629	7.82402	0.538193	1.84721	5.83446	5.0972	7.69781	7.53639	2.22748	2.06582	1.79535	4.34181	2.94699	8.71659	7.38863	3.11879	2.21026	1.71394	2.80981	4.67771	2.80804
C24	C24A	5.84334	4.52221	4.57307	5.14953	2.76713	3.3311	1.91713	6.23181	3.88534	5.81461	3.54003	3.98753	3.90496	3.64469	5.35283	6.20789	3.63918	4.65715	6.67932	7.54005	8.64232	10.7028	11.4801	12.7197	2.12423	7.89969	3.78338	5.49105	6.80802	1.11036	0.898681	5.09732	6.13971	6.15876	6.13724	1.16767	2.43151	3.18588	3.01794	4.37095	7.01568	9.01744	2.50758	1.76387	3.25161	2.23936	3.81273	3.59232
C24	C24A	6.31904	3.96602	4.57138	5.24027	2.42442	2.57885	2.07664	6.52603	3.88618	4.93087	3.61136	3.69391	3.57967	3.82208	5.20776	5.10903	3.392	3.98726	7.21122	7.29357	8.3115	9.03653	10.9251	11.121	1.99595	7.38661	2.49814	5.49723	6.72425	1.15326	0.715576	5.41407	5.72563	6.09581	6.03352	1.15332	1.83864	2.15562	3.10251	3.46472	8.48665	8.96396	3.1928	1.68424	1.99985	3.15267	3.84741	3.15585
C24	C24A	6.15897	5.05696	5.68832	5.40788	2.77514	3.52551	3.13422	6.28849	4.84387	6.12736	5.06861	4.61066	4.28264	4.67185	6.96068	6.85934	3.68633	4.50289	7.27129	7.99234	9.27803	10.0831	12.409	12.5529	2.3159	7.76547	2.56035	5.85911	7.29704	1.93542	1.81184	5.73422	6.3659	7.29257	7.44248	1.05253	2.1955	2.74105	3.24913	3.83724	7.81112	9.09685	3.61976	1.35028	3.00751	2.78424	4.93557	2.08368
C24	C24A	6.62552	4.62914	4.64582	5.53448	3.15627	2.26965	2.32173	7.06009	4.58946	5.29386	4.25245	4.06735	4.53344	4.34316	4.89764	5.61187	3.80273	3.79978	7.43336	8.36582	8.99641	9.50674	11.5193	11.9034	2.04951	6.98283	2.15812	5.84764	7.48939	0.871934	0.657293	5.957	6.94295	6.37932	6.73347	1.15704	1.78917	2.80089	2.97211	3.78217	8.60545	10.6575	3.74545	1.27423	3.39815	2.82097	4.33061	3.43636
C24	C24A	6.32606	5.12638	5.12185	5.52999	2.2018	3.42338	3.33342	6.65885	4.28851	6.49883	4.85533	4.51837	4.14777	4.0333	6.99881	7.12096	3.76111	4.06836	7.46453	8.1394	9.2946	9.62103	11.4204	12.5525	1.1123	7.91745	2.85349	6.17652	6.84767	2.61614	1.44537	5.45799	6.38377	7.06039	7.51977	1.4788	1.99137	2.43592	2.74552	4.15977	8.08605	9.68178	3.46722	1.5383	2.30009	3.68683	4.65234	2.33688
C24	C24A	7.06323	4.91875	5.50264	6.08552	2.71832	2.83523	3.42528	7.31115	4.78098	6.00619	3.98205	4.38026	4.72172	4.18891	6.42572	6.84922	4.12946	4.22892	8.09792	8.49442	9.61661	9.82865	11.8912	12.7082	1.30548	7.15715	2.1298	6.12767	7.10124	2.04792	1.35876	5.96714	6.54786	7.61382	7.80133	1.05356	2.25524	2.2729	3.09844	3.67151	8.92815	9.97852	2.46632	2.85799	2.54398	3.40505	3.84433	3.44683
C24	C24B	6.21171	4.28605	6.23632	5.36214	2.91139	2.96539	3.20645	6.06448	4.4466	5.82638	3.37562	2.81786	3.93269	3.9209	6.76676	6.50059	3.87203	3.73646	7.48278	7.25834	9.20967	8.99324	12.3654	11.6594	2.87321	7.0266	1.96999	5.87481	7.75281	1.04319	1.05003	6.02283	5.64717	7.86943	8.00742	1.73072	2.74978	2.82505	3.81071	3.36226	8.35517	7.72519	3.5045	1.75547	2.87148	1.98647	3.90022	4.69673
C24	C24B	5.83085	4.25094	5.1165	5.08537	2.42394	2.71628	3.02958	6.3882	4.70919	5.55364	3.48629	4.43012	3.48696	4.43811	6.17499	6.18136	3.14749	4.988	6.91154	7.95249	8.38195	9.65516	10.0962	12.1734	0.929239	7.778	2.81003	5.86491	6.24755	1.48151	1.42766	5.22218	6.62842	6.93509	7.09761	2.38942	1.98876	2.36375	2.90376	3.61737	7.53373	9.98059	3.05686	1.5915	2.85776	3.29395	3.65651	3.37355
C24	C24B	5.91765	4.16454	6.84882	5.29113	2.0442	3.27674	4.52641	5.94931	4.08832	6.98397	2.92286	3.50002	3.2884	3.49672	8.09771	8.16669	3.26234	3.68849	7.21763	7.33856	8.67142	8.75843	11.4847	11.1437	1.97271	7.26552	1.68444	6.26063	7.25794	1.73141	1.94575	5.32788	5.4703	8.87689	8.69445	1.92675	2.61736	2.28678	3.45194	3.61638	7.559	7.80509	2.24115	2.68394	2.54682	2.53136	3.28921	4.13419
C24	C24B	7.00753	4.54121	5.84272	5.85721	2.54052	3.13471	3.00413	6.84268	4.35855	5.7811	4.07905	3.78032	4.21354	3.85316	6.49383	6.64473	3.76736	4.26182	8.0807	7.95062	9.37839	9.96824	12.1848	12.413	2.12853	7.63046	2.3682	6.19731	7.61807	1.37792	1.49889	6.18982	5.87681	7.48217	7.3557	1.46258	2.30679	2.42774	3.69396	3.58911	9.41446	8.91475	3.75544	1.86575	2.61968	2.7129	4.11883	3.67801
C24	C24B	6.50533	5.31701	5.62989	5.5622	2.33379	3.16443	3.86161	6.33475	4.396	6.26386	5.01512	3.79138	4.52007	3.93629	7.31259	7.22391	3.95475	4.12431	7.8932	7.59963	9.16117	9.52829	11.4928	11.9113	1.00973	7.17323	2.07316	5.95727	6.56818	2.55853	1.75761	6.10477	5.64312	7.62234	7.82627	0.744806	2.03751	2.47544	3.05216	3.43377	8.97423	8.21034	4.14282	1.48626	2.57985	2.57008	4.68127	2.7246
C24	C24B	5.83886	4.28026	5.91106	5.04713	2.20429	3.19184	3.41329	5.75725	3.94369	6.10519	3.90429	3.68293	3.57711	3.3831	7.07003	6.90681	3.27597	3.93305	7.0746	7.10652	8.94263	9.14256	11.4263	10.8291	2.2551	6.83847	1.78498	5.9157	7.23248	1.7647	1.26418	5.50589	5.3872	7.14078	7.34667	1.3207	2.45916	2.30485	3.38678	3.55453	7.89423	7.77387	2.83362	2.18535	1.84535	3.10174	3.81364	3.23927
C24	C24B	5.6994	4.8876	5.57609	4.86461	3.01755	2.43373	3.47979	5.58077	3.8327	6.41318	3.95785	3.36578	4.50599	3.63699	6.18134	6.69056	3.82108	3.67235	7.2485	7.04807	8.5489	9.57648	11.0653	11.2666	1.65019	7.72551	2.54118	6.10548	7.29421	1.18899	0.666779	6.20215	5.88737	7.34299	7.37484	1.70021	2.65692	2.9872	3.15667	3.80239	8.34351	7.83535	2.74641	2.65631	2.63199	2.44074	3.77479	4.20364
C25	C25A	7.00653	3.43819	6.26134	5.4984	2.16081	3.34357	2.10737	6.57	4.64678	4.44843	4.59541	4.09922	3.39478	4.02298	6.6823	5.45316	4.57176	3.8392	8.0579	7.49965	10.9531	9.1892	12.8	11.3674	3.86423	7.49554	1.65536	6.4275	8.92185	1.31906	1.56127	6.34119	5.47394	5.81584	5.78448	3.67507	2.83257	2.48165	4.77346	2.93857	10.2337	8.69702	3.8439	2.10123	2.10701	2.94878	5.61713	3.34212
C25	C25A	6.91876	4.17202	7.61216	6.15233	2.37636	3.74111	4.3613	6.91823	4.42357	7.3597	3.57609	4.09338	3.77753	3.65039	8.43415	8.54627	4.27725	3.69422	8.21627	8.14286	10.2044	9.31222	14.3774	12.4158	4.04084	7.86894	1.81493	6.85205	9.77666	1.62601	1.785	5.91596	5.86537	9.32396	9.36876	1.91915	2.54738	1.90021	4.24547	4.00018	8.61098	8.49842	2.73048	2.69508	1.98651	3.36896	4.57664	3.58592
C25	C25A	7.10926	4.48964	6.90106	5.75663	2.69202	3.50691	3.02453	6.49988	5.28364	5.13069	4.38973	3.99881	4.07759	4.8364	7.75878	6.45341	4.72637	4.94851	8.86147	7.4844	10.7751	9.19334	13.3511	12.3521	3.11351	7.95334	1.81585	6.51623	8.12374	1.67849	2.35456	7.22722	5.51465	8.18702	7.81199	3.05545	2.94531	1.85085	4.80177	2.81678	10.9087	7.80139	4.07088	2.646	2.07618	2.72766	5.37391	3.66384
C25	C25A	7.54869	5.40952	5.94952	6.05908	2.92571	3.21453	2.97729	7.12197	5.29743	5.4195	4.46453	4.55404	4.8096	5.16172	6.83769	6.36028	4.29771	5.32105	9.04935	8.30908	10.4798	9.97691	13.1623	12.6936	2.19315	7.86154	1.92166	6.39891	7.45944	1.48242	2.18177	7.35965	6.36631	7.98711	7.76482	1.36676	3.0001	1.99467	3.96876	3.2925	11.2238	9.42889	3.62176	3.12582	2.19338	3.47124	4.50633	3.91485
C25	C25A	5.83608	3.3374	7.77222	5.06054	2.45911	2.80354	4.37064	5.89933	3.65153	7.57849	4.23022	3.74934	3.23386	3.30742	7.88857	8.09398	3.25264	3.54304	7.66083	7.51571	10.3712	9.01373	12.167	11.1759	3.24699	9.17037	2.20951	7.77256	9.93792	0.267217	1.00546	6.15384	6.17826	7.93207	8.46705	1.39084	2.68197	2.65283	4.59457	4.3841	8.65992	8.59011	3.14816	2.53966	2.07856	3.56155	5.23415	4.10868
C25	C25A	6.796	3.71118	7.14247	5.91324	2.58735	3.48773	3.36874	6.6927	4.11388	6.57479	3.26843	3.70663	3.50127	3.62848	7.38271	7.40369	3.26505	3.77732	7.8695	7.85077	9.83647	9.26739	13.2817	12.6383	3.57267	8.43078	2.61883	6.61326	8.7723	0.443676	1.46555	5.8798	5.69854	8.25943	8.21815	2.59881	2.85222	2.15741	4.50035	3.95658	8.54295	8.29967	2.73836	2.51526	1.97041	3.13515	3.89068	4.0507
C25	C25A	6.60205	4.65592	5.44559	5.28431	2.72324	2.58446	2.77759	6.53034	5.079	4.91278	4.70524	4.16936	4.13465	5.27387	6.28457	5.38691	3.87163	5.34461	7.96945	7.96583	9.36846	8.88671	11.4007	11.2941	1.85089	7.55561	1.6578	6.16306	7.01027	1.43728	1.86394	6.60692	6.50443	7.0344	7.24781	1.54261	1.89578	2.18062	3.61044	3.14251	9.92353	9.79786	3.69254	2.30879	2.48745	3.43814	4.97742	3.35541
C25	C25A	6.46052	5.29469	5.08693	5.18323	2.88266	3.25388	2.19257	6.18906	5.5843	4.3611	4.34353	3.886	5.0931	5.17781	6.07333	5.33515	5.29286	5.03627	8.04012	7.54706	9.34559	8.97484	12.2132	11.7739	2.42344	6.6543	1.71415	5.43674	7.01959	2.14203	1.83978	6.81625	6.17013	7.36419	7.26511	1.32349	2.36564	2.20799	3.569	2.80179	10.0029	8.86783	3.28232	2.89026	2.88825	2.58336	4.85473	3.8047
C25	C25B	7.52835	3.6558	5.78982	6.08025	1.72172	3.42013	2.48687	7.42683	4.22327	5.09498	3.5755	4.02136	3.08229	4.16074	6.82345	5.97543	3.61632	4.47099	8.36822	7.98227	10.041	9.56381	12.1354	11.8707	2.41481	7.9476	2.08561	6.36094	7.40561	1.63624	2.03247	5.90455	5.54837	6.58145	6.36663	1.50836	2.81942	2.10447	4.0835	3.34812	10.1901	9.43792	2.89996	2.77089	1.78764	3.46489	4.14297	3.91701
C25	C25B	6.55467	4.41095	6.3739	5.41978	2.57273	3.00203	3.34278	6.43065	5.59492	4.98588	3.74084	4.61387	4.01988	5.09826	7.08295	6.42788	4.03685	5.15874	8.25855	7.74314	9.80274	8.41243	12.8092	10.9785	3.0207	6.75557	0.565137	6.35955	7.95453	1.3978	2.49006	6.65672	6.18318	8.12461	8.07227	1.63608	2.88243	1.42126	4.10448	2.78147	9.9186	8.99214	3.22157	2.94897	1.93911	3.662	4.28412	3.70706
C25	C25B	6.73563	4.29393	6.60821	5.74863	2.5051	3.70929	3.09022	6.67699	4.58774	6.2195	3.89615	3.51093	3.70834	4.2451	7.52003	6.99648	4.59999	4.40463	7.96321	8.07416	10.5366	9.19328	13.4708	12.3034	3.52359	8.14272	2.13549	6.61489	8.64593	1.49447	1.61782	6.13934	6.11274	8.08797	8.43413	2.84489	2.47392	2.56576	4.25707	3.91974	9.0218	9.0671	2.9247	2.65349	2.91795	2.68658	5.31196	4.27862
C25	C25B	7.37547	3.93032	6.04333	6.08522	2.26311	3.26282	2.70294	7.304	4.30052	5.57648	3.54117	3.82719	3.54572	3.70208	6.54276	6.58092	3.804	3.90021	8.24714	8.22384	10.3205	9.6604	12.7349	11.9946	2.82916	7.5267	1.8344	6.50798	7.94196	0.857223	1.6165	6.04636	5.93965	7.05739	7.01458	1.46239	2.93961	2.47278	4.09693	3.65631	9.73409	9.57168	2.94068	2.6591	2.28737	3.21563	4.32308	4.42772
C25	C25B	7.10263	4.40082	6.20851	5.88839	2.31614	3.69105	2.7884	7.12513	4.74797	5.89496	3.99335	4.05414	4.03097	4.23061	6.93264	6.99476	4.40216	3.90877	8.12496	8.64563	9.71019	9.59368	12.795	12.7824	2.81987	8.24368	2.33231	6.80028	8.54987	1.45684	1.93683	6.23373	6.56594	7.8624	7.88661	2.60194	2.29045	2.61439	4.14585	3.97429	9.57395	10.3459	3.30462	2.43029	2.23239	3.96728	4.80943	4.25839
C25	C25B	6.6914	4.33201	5.76379	5.44291	1.9844	3.66434	2.56337	6.82263	5.11071	5.18308	3.65487	5.00407	3.8732	4.65552	6.74703	6.52268	4.11185	4.23422	8.04208	8.21941	9.25062	9.26613	12.1201	11.6423	2.54504	7.54183	1.66101	6.50152	7.84728	1.76891	2.35521	6.21942	6.49555	7.38375	7.01325	2.28476	2.75875	1.90409	3.97699	3.49009	9.81261	10.2728	3.00791	2.89339	2.26353	3.91534	4.11047	3.82076
C25	C25B	6.02678	4.98753	5.86067	4.74381	2.54668	3.35272	2.63947	5.68597	5.02137	5.21338	4.26641	4.41038	4.5703	4.5703	6.65535	6.27051	4.2807	4.24796	8.1615	7.41002	9.20232	8.43893	11.8087	11.1862	2.44274	7.67787	1.83157	6.49447	7.85203	1.55514	1.93708	7.13842	6.21121	7.7861	7.47234	2.09725	2.8307	1.86598	4.10985	3.353	10.3586	8.82731	3.79634	2.86584	2.2797	3.39591	4.39537	3.99476
C26	C26	4.90188	4.33619	6.13102	4.3393	2.5802	3.59929	3.08643	5.41822	4.96587	6.60391	2.52303	4.38577	3.44155	4.72482	7.16562	7.32275	3.7967	4.05912	6.43538	8.27479	8.58076	9.36666	11.9018	10.4669	3.29767	7.59568	1.22096	6.80855	8.07134	1.27404	1.72149	5.46004	7.44755	8.11839	7.97723	0.821192	3.43341	3.55727	3.66935	4.54999	7.03288	10.2907	3.23514	1.55469	2.82207	4.18647	3.23793	5.99689
C26	C26	5.34577	4.34733	5.82449	4.5722	1.83395	3.69078	3.17514	5.54489	3.21769	7.33301	4.72012	3.96214	3.70277	3.06459	7.11052	7.78152	3.62851	3.37518	6.92958	7.56953	8.40652	9.13392	10.8144	11.9617	2.02684	9.54082	3.61825	7.24547	8.58059	2.03431	1.18277	5.54959	6.27597	7.34238	7.59161	1.30913	1.57185	2.74798	3.50435	5.05803	7.97715	9.16978	4.12958	1.10871	2.5182	3.49261	4.95966	3.04876
C26	C26	5.68295	4.28476	6.51654	4.78176	2.21743	3.33085	3.54017	5.6887	4.23109	6.58114	4.67223	4.58903	4.15233	4.0988	7.09845	7.43933	4.25038	4.20543	7.46924	7.63828	9.39106	9.04048	12.3478	10.9668	3.43532	8.43282	1.91971	7.08702	9.73437	1.57123	2.00941	6.19827	6.30895	7.4494	7.6454	3.09622	2.31433	2.28082	3.99992	4.10594	8.80921	9.03821	3.80776	1.96586	2.34237	3.582	5.1681	3.08758
C26	C26	6.6147	4.17337	6.55733	5.2378	1.99912	3.17468	3.32322	6.19552	3.99813	6.05255	4.45112	4.6039	3.97175	3.82051	7.13641	6.89391	3.78593	3.74785	8.23322	7.64661	9.58836	9.12245	12.2335	10.9669	2.91959	8.45875	1.75417	7.23943	9.18766	1.44239	1.86996	6.76139	5.81921	7.22678	6.93738	2.53753	2.86657	2.02931	4.3758	3.74047	10.3932	8.8815	4.09498	2.33924	0.81855	4.67605	4.50376	3.50676
C26	C26	5.14	4.49945	6.90201	4.41099	2.84463	3.14063	3.7991	5.27442	5.3601	6.33953	4.44773	5.2003	4.13994	4.8945	7.47662	7.38008	3.61855	4.33719	7.20235	7.91818	9.01789	8.81156	11.8745	11.0252	2.98446	8.00681	1.43761	7.04768	8.88437	1.17485	1.98831	6.43823	7.08962	8.07262	8.38523	2.64764	2.59053	2.17641	4.09483	3.82658	8.33301	9.46822	4.09071	1.65567	1.88168	4.65405	4.57391	3.31234
C26	C26	5.08165	4.70442	6.88048	4.2666	3.24656	2.64834	3.8319	4.85353	4.74112	6.32372	4.97868	4.914	4.47134	4.43021	7.24351	6.85489	4.06247	3.70249	7.52715	6.85605	10.4139	9.21098	11.7362	10.8246	2.80056	8.14781	1.92262	6.75578	8.66739	0.901079	1.17037	7.04338	6.23015	7.08352	7.01556	1.21146	3.81141	3.11597	4.19107	3.49619	8.96165	7.68057	4.23512	1.99835	2.01827	3.33088	4.91173	3.61505
C26	C26	6.19495	4.6451	5.91437	4.99791	2.48838	3.0055	3.02521	5.98998	3.97705	6.23304	4.50004	4.44776	4.40377	3.65959	6.34074	6.92722	4.8103	3.63808	7.92068	7.59781	10.0337	8.81935	12.3727	10.8135	3.04668	7.9971	1.80395	6.94381	9.12609	1.03702	1.44169	6.67816	6.19221	7.373	7.31691	2.13701	2.37386	1.96663	3.88783	4.08452	9.80539	9.02447	3.79443	2.39115	2.33669	3.35133	5.61355	3.35313
C27	C27A	4.29247	5.42776	4.77925	3.68238	3.10919	3.03615	2.61095	4.56272	4.93635	5.91326	3.4695	4.77458	4.70396	4.73172	5.74061	6.50724	4.10902	4.4088	6.4108	7.38698	7.87932	8.15872	10.7946	10.2455	2.10713	7.11861	1.86019	5.98539	7.21115	1.39438	1.5094	6.09838	7.11991	7.58598	7.72412	2.11609	2.56402	2.18382	2.87252	4.10598	7.45347	9.09786	2.71631	2.53096	1.96466	4.45077	3.63183	3.90406
C27	C27A	4.04889	5.64345	6.11589	3.60277	4.09388	2.3278	4.04197	4.02482	4.69255	6.99689	4.23621	4.05046	5.30432	4.51596	6.5945	7.19125	4.56835	3.94296	6.3893	6.40949	8.16242	8.80048	10.7071	11.0578	1.76539	7.47723	2.65328	5.96717	7.34008	0.99425	0.365616	6.71738	6.65909	8.56844	8.49337	1.83198	2.60503	2.84476	3.09944	3.85041	7.12443	7.09552	3.02982	2.2732	2.06198	3.22018	4.44714	3.45006
C27	C27A	3.92545	4.71032	5.0309	3.43646	3.11276	2.48363	2.93136	4.05734	4.60397	5.46452	3.43243	4.09064	4.27263	4.4247	5.69266	5.8569	3.57626	4.23566	5.75929	6.43456	7.74288	8.05762	9.77216	9.86772	1.91169	6.81525	2.03775	5.34191	6.62449	1.1836	1.07372	5.61178	6.22638	6.80985	6.88667	1.62394	2.71964	2.56449	2.82488	3.383	6.5193	7.59729	2.48824	2.15868	2.12326	3.29473	3.37878	3.62385
C27	C27A	5.30408	3.66339	5.53713	4.47924	2.15437	2.84499	2.77038	5.20891	3.84345	5.19199	3.51638	3.4016	3.58322	3.37081	6.01323	5.93526	3.95811	3.67257	6.51822	6.5699	8.14371	8.42948	10.0587	10.5371	2.13454	7.04257	2.26788	5.62149	7.21202	1.35646	1.2485	5.29816	5.17207	6.51914	6.48213	2.3765	2.19883	2.22803	3.489	3.18304	7.57746	7.46648	2.41417	2.39517	1.95818	2.77964	4.17202	3.29054
C27	C27A	5.06849	4.79119	5.44913	4.39761	3.16246	2.54228	3.18015	5.26764	5.42885	5.21383	3.08753	4.02564	4.60234	5.51409	5.98973	5.87162	4.55309	5.35528	6.9467	7.10281	8.45744	8.63065	10.7083	11.2179	1.78385	7.44968	2.1957	5.59547	6.8823	1.39617	2.04367	6.10035	6.55299	7.76644	7.65135	2.60833	2.98387	2.48444	3.18077	3.03907	7.90012	8.47985	2.52808	2.75726	1.77983	3.89574	3.53219	4.53467
C27	C27A	3.62312	4.42979	5.20386	3.13438	2.48849	2.68869	3.15692	3.53728	3.4553	5.9501	3.29727	2.95315	4.36665	3.05218	5.6687	6.64218	4.29033	3.86959	5.94459	5.19674	7.16436	7.46716	8.94427	9.59993	1.55781	7.18799	2.94102	5.42624	6.77676	1.42266	1.24177	5.53584	4.92626	7.22899	7.11245	2.44103	2.38729	2.18189	2.99064	3.42981	6.86977	5.78612	2.74682	2.25008	2.33316	1.8724	3.67853	3.61121
C27	C27A	4.66007	4.11654	5.42868	4.00443	2.27679	2.61561	3.30988	4.74322	4.08955	5.62598	4.00694	4.09143	3.93457	3.53942	6.18309	6.39758	3.80657	3.554	6.20261	6.68572	7.85399	8.06072	9.53917	9.77624	1.65051	6.60563	1.67711	5.79357	7.0041	1.71601	1.21441	5.32349	5.74891	6.72741	6.93677	1.95302	1.92935	2.02427	3.05449	3.37763	7.12092	7.89666	3.15731	1.63162	2.01246	3.29503	4.23569	2.57194
C27	C27A	4.92785	4.53904	5.25253	4.16133	2.70715	2.22502	3.33635	4.98297	3.59901	6.30209	3.66255	3.78512	4.40985	3.40221	5.74403	6.57207	3.84965	3.39455	6.66142	6.88846	7.90141	8.3662	10.3669	9.77822	2.0546	7.30877	1.81013	6.33443	8.03579	1.37305	0.621624	5.8851	6.0994	7.08937	7.11913	2.5321	2.33476	2.42363	3.00979	3.97617	7.84127	8.23056	3.07069	2.14571	1.77579	3.69936	3.62707	3.81034
C27	C27A	6.16333	5.15632	5.30475	5.20787	3.19467	2.48299	3.1617	5.96298	4.77293	5.34808	3.31377	3.65569	5.00025	4.6207	5.9001	5.87313	4.53393	4.7467	7.54686	7.26339	9.09	8.90996	11.7927	11.4917	2.04478	6.93834	1.94065	5.44581	7.04464	1.57615	1.42225	6.39658	5.9197	7.71858	7.53131	1.86061	3.06799	2.22899	3.10248	3.03668	8.75873	7.9681	2.35944	3.15238	2.18308	2.83122	3.34089	4.28524
C27	C27B	3.73635	4.56393	6.38135	3.27156	3.46512	2.43796	3.68067	3.87457	5.23809	6.11212	2.42613	4.11219	4.24808	4.82386	6.81063	6.6134	3.95057	4.32041	6.32119	6.79927	7.56454	8.02052	10.2362	9.92309	2.32478	7.26051	1.6082	6.37213	7.81592	0.859424	0.83635	6.37012	6.94945	9.01892	8.5877	1.64487	3.42188	2.44113	3.65441	3.56237	7.21384	8.03661	2.9361	2.44302	1.68138	4.31002	2.8259	5.31418
C27	C27B	4.24272	6.13741	4.74956	3.79485	3.49102	2.9638	3.28292	4.22416	4.14269	6.69668	3.67487	3.93116	5.42107	3.84913	5.88363	7.35679	5.10574	3.94207	6.11667	6.14479	8.2525	8.6599	11.0994	10.679	1.67217	6.8896	2.70871	5.36533	6.74913	1.7849	1.44779	5.96417	5.93074	7.84935	7.5215	0.945147	2.78169	2.93898	2.31731	4.02812	6.6946	6.68855	2.68524	2.13258	2.05757	2.75753	4.04603	3.52007
C27	C27B	3.73681	5.17961	4.83996	3.40669	3.44695	1.89914	3.78833	4.09684	3.14272	7.84221	3.10173	3.9193	4.86503	3.01954	5.48465	8.01932	4.3729	3.17165	5.28689	7.05398	6.69844	8.77444	9.63671	9.89798	1.47519	7.83145	2.42365	6.6866	8.03268	1.38366	0.511637	5.34412	7.03781	7.7314	7.90801	1.48095	2.05603	3.07797	2.06318	5.16161	5.5788	8.45259	1.94808	2.11805	2.82872	3.33512	3.29623	3.96975
C27	C27B	4.55935	4.22795	5.44899	4.05834	2.49913	2.8539	3.26054	4.64047	3.5197	6.3294	3.52018	3.42472	3.99436	3.19649	6.16475	6.81781	4.25815	3.81437	5.89582	6.37082	7.9974	8.71024	9.96189	10.7699	1.96737	7.42144	2.97667	5.59581	7.22445	1.59699	0.948541	5.01358	5.44857	6.96076	7.0903	1.91401	2.20636	2.61947	2.91994	3.84858	6.35529	7.16181	2.14881	2.17116	2.46175	2.40929	4.18663	3.22342
C27	C27B	4.62555	3.53782	6.27595	4.04159	2.19082	2.86688	3.51712	4.91598	4.06652	6.36344	3.78643	4.05913	3.07547	3.78165	6.92163	6.96396	3.32186	4.09825	6.195	7.24769	7.90777	8.64818	9.81739	10.4513	2.09413	8.16532	2.20383	6.6802	7.79384	1.05667	1.32528	5.21617	6.36639	7.39242	7.65776	2.40503	1.72721	2.42976	3.61286	4.02775	6.94499	8.815	3.05545	1.66574	2.22275	3.7784	4.6021	3.2717
C27	C27B	3.8929	4.46006	5.3046	3.4359	1.83605	3.50343	3.27886	3.86482	3.59211	6.1021	3.83195	2.91327	4.02517	3.07842	6.92769	6.9575	4.23866	3.93527	5.88476	5.46896	7.39472	7.57943	9.2957	9.83841	1.49488	6.86974	2.73854	5.34193	6.45414	2.65778	1.40801	5.04279	4.70893	7.1844	7.41428	1.8467	1.9342	2.30234	2.90624	3.48398	6.60871	6.02559	2.92134	1.80761	2.18875	2.11933	4.13752	2.98932
C27	C27B	4.243	4.82505	4.84925	3.77549	3.3607	2.04321	3.20444	4.54342	5.13987	5.21942	3.20451	4.23276	4.3428	5.31054	5.68308	5.27476	3.84201	4.98593	5.94897	6.73949	6.93968	8.1542	9.68978	10.3306	1.33454	7.16608	2.2767	5.11804	5.99151	1.47104	1.0894	5.61078	6.60598	7.52802	7.47299	1.40388	1.9966	2.10683	2.51861	3.07366	6.53466	8.11109	2.73724	1.80529	2.1679	3.47153	3.23789	3.2059
C27	C27B	4.61059	4.29657	4.86271	4.07705	2.49686	2.35999	3.2425	4.95144	3.23534	6.60106	3.8059	3.91913	3.86966	3.10885	5.69675	6.76915	3.24279	3.41743	5.87227	6.95332	7.55499	8.43433	9.47351	10.3111	1.36122	7.56885	2.58429	6.1228	7.17116	1.51012	0.447982	4.93241	6.13614	6.51743	6.96131	1.25345	1.82459	2.41303	2.49265	4.35219	6.37933	8.44239	2.52545	1.71802	2.08944	3.53109	3.74887	2.77512
C27	C27C	4.52721	4.84946	4.60559	4.04932	2.94353	2.28652	3.22694	4.83511	3.79893	6.29918	3.90263	3.96093	4.40891	3.83291	5.45362	6.48003	4.17402	4.15382	5.90655	6.78704	7.95235	8.86234	10.2554	9.87651	1.72311	7.11371	2.06809	5.62221	7.02596	1.54547	1.01552	5.17802	6.22653	6.54275	6.86838	1.50674	2.17018	2.75379	2.26171	3.98992	6.32472	8.0891	2.90279	1.37479	2.06606	3.40443	4.26426	2.90345
C27	C27C	3.76189	5.54627	4.8821	3.33247	3.24925	2.23802	3.75071	3.91798	5.49433	5.36673	3.51321	4.18378	5.00375	5.16874	6.05928	6.25112	4.47394	5.03419	5.73696	6.76114	7.07871	8.55541	9.31619	9.35135	0.867556	5.62832	0.842506	5.09449	5.68217	2.04221	1.86606	5.76233	6.64273	7.68865	7.70732	1.15742	2.432	2.70993	2.28835	2.98671	6.41604	7.94388	2.56177	2.15732	2.50147	3.33744	3.41766	3.72471
C27	C27C	4.2404	4.50922	5.24265	3.80613	3.11441	1.8438	3.79494	4.4851	3.28435	7.03026	3.35407	3.96264	4.31747	3.15558	5.56022	7.19944	3.63981	3.13198	5.80463	6.58492	7.31938	8.17582	9.74127	9.7331	1.70021	7.40421	2.22367	6.16092	7.64336	0.822428	0.44871	5.33917	6.25056	7.39772	7.42534	1.40095	1.98811	2.34086	2.50777	4.28483	6.25216	7.74635	2.58491	1.77286	2.59574	2.80331	3.57052	3.09516
C27	C27C	5.80119	4.56648	5.95112	5.17483	3.08024	2.83063	3.47113	6.09769	5.4296	5.62557	3.23291	4.44642	4.26249	5.29778	6.48017	6.56214	4.15504	5.16258	6.97035	7.8719	9.30379	9.25229	11.8769	11.8525	2.45332	7.0916	1.74881	5.69086	7.38669	1.15622	2.21057	5.63412	6.64173	7.81899	8.00412	2.1328	2.76159	2.33249	3.24104	3.26693	7.29207	9.15753	2.35598	2.34382	2.03201	3.87077	3.83424	3.79783
C27	C27C	4.37065	4.13662	6.11746	3.80907	2.78535	2.80203	3.34918	4.44039	4.51785	5.89987	3.56698	3.98711	3.68375	4.14806	6.69001	6.55344	3.57363	4.74609	6.11572	6.77476	8.4914	8.83334	10.3426	10.1212	2.44134	7.26663	1.79628	6.04146	7.34196	0.919392	1.30951	5.64698	6.14317	7.21537	7.29169	1.9575	2.8002	2.75392	3.5431	3.53975	6.92975	7.88632	2.50915	2.35561	1.91932	3.61065	4.05795	3.94296
C27	C27C	3.98393	5.08032	4.30583	3.61496	3.17795	1.97254	3.36637	4.35857	3.5769	6.69191	3.88835	4.77441	4.55107	3.58531	5.27084	6.76081	3.62143	3.74863	5.24294	6.90773	7.43817	8.51837	9.47203	9.64054	1.18589	7.22212	2.11195	5.78766	6.78011	1.63208	0.601728	5.01593	6.6163	6.4322	6.71974	1.11107	2.19952	2.4384	1.84988	4.36579	5.47272	8.32188	2.51741	1.3257	1.64759	4.19587	3.69096	2.07008
C27	C27C	4.31931	4.7528	5.29815	3.8373	3.30587	2.19027	3.43317	4.45537	4.09091	6.27662	3.59423	3.77309	4.49483	3.71074	5.67909	6.7273	4.08325	3.47492	5.85116	6.68024	7.29204	8.51386	9.91037	10.2361	1.67405	6.58483	2.1341	5.66702	6.98687	0.848477	0.718936	5.60666	6.29507	7.44902	7.59844	1.7165	2.04971	2.50949	2.69923	3.79651	6.40128	7.7332	2.66916	1.81161	1.67649	3.73401	3.92197	3.23619
C27	C27C	5.63062	4.92536	4.90985	4.55059	2.61317	2.57696	2.75855	5.61199	3.67687	6.1258	4.72542	4.30697	4.51202	3.49691	5.75765	6.3242	4.11743	3.44416	7.46455	7.22565	8.68002	8.80297	10.9566	10.1006	1.93384	7.1478	1.81574	6.55374	7.90398	1.60678	0.34605	6.40332	6.25605	6.73928	6.78744	2.79634	1.88385	2.08291	3.15991	4.18761	9.23357	8.89746	3.95515	1.91684	2.03994	3.62225	4.82021	2.91027
C28		3.84755	3.44779	3.77017	3.37111	2.03438	2.307	1.98279	3.80243	2.45672	4.67659	2.67688	2.20342	2.67849	2.47301	4.6952	4.66071	2.20569	2.26884	4.7942	4.76705	5.95602	5.97477	8.31399	7.9784	1.69158	5.32863	2.06282	4.06918	4.97816	1.13083	0.0399482	4.00355	3.90336	5.31828	5.54795	0.935368	1.49131	1.63939	2.23481	3.06975	5.26357	5.12976	2.31143	1.12361	1.07423	2.27232	2.69557	2.35294
C28		3.83733	3.07711	4.93963	3.28487	2.35226	2.16642	2.34388	3.59978	3.71807	3.80239	2.39298	2.98293	2.94223	3.52527	5.08644	4.54163	2.16317	3.42954	5.24083	4.54211	6.67815	6.21996	8.54797	8.24691	2.12648	5.57941	1.58818	4.17845	5.137	0.254395	1.53084	4.74187	3.89405	5.7465	5.23752	1.67774	2.87886	1.7777	3.16241	1.9315	6.06738	4.60957	2.16917	1.93926	1.25898	1.86563	2.09154	3.00223
C28		2.89764	3.58215	5.2386	2.58923	2.89749	2.20398	2.78046	2.96196	4.4047	4.61185	2.87221	3.71224	3.28477	3.90727	5.58587	5.19018	2.89984	3.29776	4.69951	5.11987	6.7068	6.25027	8.06957	8.39357	1.84109	5.52073	1.56308	4.63724	5.52671	0.560163	0.809008	4.8922	5.26579	6.32865	6.29741	1.62664	2.45789	2.00137	3.01591	2.57426	5.22277	5.85536	2.01807	1.91325	1.24712	3.16037	3.20659	2.78195
C28	C28	3.23101	3.23056	5.03175	2.88507	2.04478	3.30912	2.02376	3.13007	3.42163	4.58255	2.30424	2.25576	2.95038	2.55003	5.3984	5.67969	2.69782	2.50386	4.84241	4.11807	6.01867	5.39596	8.49011	8.99936	2.2534	5.67484	2.75239	4.05405	5.51072	0.66378	1.35395	4.32285	3.64656	6.52491	6.33567	1.75031	2.09753	1.55322	3.37394	2.80822	5.34476	4.15379	1.80315	2.04108	1.47832	1.50798	2.64029	2.84871
C28	C28	4.26122	3.18219	4.04555	3.64356	2.40309	1.44723	2.32976	4.03182	2.61928	4.21935	2.07009	2.47393	3.09522	2.5957	4.16089	4.24368	2.74235	2.66227	4.79655	5.11421	6.03531	6.57886	8.05558	8.11946	1.69007	5.07176	1.68653	3.94936	5.29153	0.333384	0.0545938	4.26174	4.0005	5.46629	5.17216	0.795101	1.93203	1.52838	2.25908	2.46858	5.35095	5.33926	1.42783	1.9387	1.05568	2.30341	2.30341	2.71748
C28	C28	3.69544	3.37872	4.2843	3.21159	1.89555	2.45213	2.31201	3.55366	2.71938	4.64963	2.5666	2.44523	2.87369	2.3967	5.00654	5.07971	2.69107	2.3172	4.84694	4.61757	6.04192	5.86136	8.11896	8.08694	1.6761	5.31267	2.04598	4.13964	5.20231	1.09233	0.708877	4.16992	3.74887	5.65433	5.64412	0.817823	1.87178	1.54171	2.51549	2.77312	5.45946	4.84034	2.01544	1.67138	1.3302	1.93964	2.73385	2.50694
C28	C28	3.42583	3.33919	4.93991	2.98721	1.94591	2.83135	2.44184	3.29175	3.1516	4.80346	2.93344	2.75677	2.59101	2.64606	5.79924	5.46678	2.17586	2.42357	4.95001	4.56293	6.18644	5.96361	8.09647	8.44581	1.79963	5.7503	2.23292	4.4375	5.03156	1.03672	0.963934	4.44703	3.91548	5.92586	5.91037	1.52743	2.08414	1.73083	3.03446	2.8023	5.62463	4.8325	2.31168	1.66737	1.28647	2.13479	2.88059	2.49149
C28	C28	3.9981	3.82943	3.57445	3.56886	1.95062	2.60431	2.05406	4.22757	3.38864	4.44019	2.48386	3.68209	3.15868	3.90153	4.43466	4.93962	3.25068	3.9194	4.86376	5.53419	6.55921	6.73206	8.82402	8.29115	1.67155	5.39194	1.67518	4.03025	5.03362	1.14037	2.03673	3.85269	4.64158	5.40209	5.34152	1.38078	1.83274	1.53553	1.9664	2.92706	5.10674	6.49595	1.48738	1.82935	1.50847	2.70967	3.07334	2.016
C28	C28	3.72388	2.65932	4.46462	3.1661	1.84952	2.35548	1.85188	3.50799	2.4826	4.22835	2.52688	2.33849	2.47216	2.19617	4.68002	4.56331	2.32096	2.09913	4.82995	4.35729	6.22999	5.93933	7.88041	7.99498	2.00716	5.49651	2.2618	4.17204	5.32082	0.365267	0.495028	4.13986	3.47136	5.06043	4.87266	1.45835	1.93062	1.61709	3.03439	2.6928	5.60836	4.50484	1.96269	1.723	0.996919	1.96148	2.89142	2.4779
C28	C28	3.04486	3.24961	3.82608	2.62332	2.57784	1.77916	1.73912	3.10689	3.50795	3.71188	2.26241	2.99069	3.22881	3.19541	3.84713	4.09382	2.77766	2.70002	4.37276	4.75241	5.43633	5.83325	7.59047	7.31628	1.86681	4.66785	1.35609	3.93506	4.93578	0.0359757	0.609445	4.39093	4.68052	5.17166	4.99772	1.28172	2.01102	1.72488	2.47512	2.44483	5.04458	5.62773	1.73736	1.79285	1.33192	2.60279	2.43546	2.82002
C28	C28	3.6569	3.22276	4.67615	3.21352	2.33126	1.87313	2.73681	3.54945	3.37272	4.2941	2.96965	2.87096	3.11919	3.03205	4.83831	4.86329	2.95633	3.03689	4.88907	4.63622	7.42228	6.21672	8.66082	7.65783	2.41789	4.89754	1.16744	4.06191	5.95454	0.490557	1.03483	4.39982	4.03639	5.14859	5.27712	1.37973	2.58709	2.04349	2.60056	2.1761	5.43026	4.84947	1.9825	1.75407	1.64887	1.67591	3.24184	2.63072
C29	C29A	5.53638	5.67025	6.57765	4.48959	3.68167	3.14447	3.10599	5.16992	6.48226	4.95494	4.88572	4.77734	5.52191	5.65671	7.02195	6.35416	5.25624	4.55649	8.5191	7.17615	9.82355	9.40698	12.4684	11.8487	2.67018	7.40565	1.49968	6.38976	8.11829	1.38049	2.15104	8.08552	6.73505	8.40296	7.74931	2.27922	3.38356	2.74382	4.46095	2.7189	10.4798	8.16196	3.86049	3.36758	2.42488	3.20395	5.08591	4.21323
C29	C29A	4.53669	5.12988	6.57055	3.83283	3.34152	3.38263	3.16099	4.32572	5.50863	5.64771	4.61141	3.7143	4.51226	4.85015	7.40745	6.64626	3.95179	4.52414	7.27673	6.49742	8.46991	8.1265	11.4778	11.1988	2.61589	7.59055	2.12425	6.158	7.40366	1.3359	1.61508	7.06464	6.18747	8.50073	8.55261	1.66534	2.4773	2.38443	4.23677	3.21603	8.61272	7.25196	3.98811	2.21829	2.408	2.81801	4.68017	3.72228
C29	C29A	4.22705	4.62566	6.40232	3.5363	3.38245	3.08714	2.7563	4.05335	5.89079	4.68401	3.99903	3.86184	4.33788	5.39716	6.82495	5.83961	4.10886	4.7117	7.01395	6.24922	8.61214	7.63264	11.7029	10.2866	3.52326	7.06172	1.40894	5.934	7.89965	0.920444	2.07516	6.93021	6.17059	7.90354	7.77596	2.78533	2.97107	2.32431	4.36861	2.64468	8.37296	7.13337	3.22683	2.8386	2.01347	3.14331	4.43061	4.09137
C29	C29A	5.27411	5.4818	5.75179	4.19988	3.86377	3.37184	1.70993	4.66666	5.35806	4.58168	5.32122	3.82491	5.34888	4.66118	5.90336	5.41282	4.55662	4.22571	8.05826	5.97595	9.34207	8.97261	13.2625	11.4372	4.00396	6.77093	2.23596	5.49575	8.0172	0.353491	1.12224	7.84441	5.78211	7.17993	6.64308	3.11379	2.78555	2.79369	4.51863	3.12602	10.0676	6.28586	4.59691	2.26934	2.36494	1.91269	5.32996	3.2955
C29	C29A	5.64382	5.61183	7.07667	4.68655	3.8245	2.82043	3.89143	5.24043	6.47229	5.3093	5.18549	5.19208	5.43445	5.71674	7.74113	6.6138	4.6945	4.57623	8.63023	6.92387	9.61618	10.5018	11.4313	12.4761	1.26956	7.83659	1.88512	6.41983	7.15837	1.80603	2.09627	8.10724	6.45117	8.50708	7.42392	1.31095	3.53095	3.38113	4.4552	2.48368	10.3922	7.44245	4.41977	2.778	2.31209	2.84056	4.71994	3.7515
C29	C29A	5.04911	4.37784	6.16785	4.24794	2.89891	3.53449	2.43893	4.83185	5.04596	5.04596	4.00652	3.79753	3.95233	4.3083	6.73594	6.14685	4.07733	4.05653	7.09553	6.42929	9.3549	8.60521	11.8306	11.0817	3.23698	7.16511	2.0955	5.78773	7.46331	0.984907	1.64646	6.38824	5.62193	7.17598	6.92431	2.34594	3.05641	2.74171	4.31948	3.12829	8.41266	7.12864	3.31361	2.37535	1.80829	3.01241	4.65233	3.94992
C29	C29A	5.43288	6.2445	4.98092	4.29348	2.81495	3.47343	2.58281	4.87521	4.27059	5.80258	4.78893	3.46187	5.69966	3.90081	6.07318	6.5979	5.35124	4.57893	8.24633	6.30069	9.63764	8.5982	11.941	10.7691	2.187	7.31541	2.42076	5.91949	7.48226	1.95678	1.56225	7.50159	5.47739	7.54412	7.30955	2.36796	3.05155	2.46751	3.368	3.71124	10.3701	6.92176	3.99724	2.99886	2.87496	1.7895	4.90998	4.22001
C29	C29A	5.70533	5.5544	5.99772	4.66979	3.21892	3.30601	2.93042	5.20795	5.23067	5.31435	5.38562	4.86935	5.04126	4.7272	7.10514	6.13062	5.04185	4.2225	7.98983	6.71372	10.0722	8.90884	12.2112	11.6911	2.45653	7.27691	2.11479	5.80126	7.2983	2.03812	1.4517	7.31564	5.72763	7.35672	7.14975	2.08713	2.85595	2.36658	3.94604	3.00927	9.76147	7.13004	3.51199	3.02279	1.76274	3.0101	5.67301	2.1611
C29	C29B	6.47503	6.23106	6.00333	5.2657	3.91358	3.07653	2.9593	5.85197	5.49386	5.56328	5.054	4.4063	5.52844	5.28741	7.1057	5.97815	4.74691	4.96232	9.0052	7.01845	10.1996	10.5614	13.2173	12.8644	2.25442	8.20946	2.82859	5.92321	7.17029	1.81815	1.12214	8.18948	6.15598	8.21879	7.48766	1.84124	3.40801	2.79934	4.01966	3.1479	11.0741	7.19443	3.82237	3.41981	2.19543	2.51384	4.6918	3.80544
C29	C29B	6.31941	5.7069	6.72428	5.23259	3.8931	2.9672	3.43296	5.77762	5.45402	5.91138	5.32466	4.72266	5.32214	5.16358	7.45927	6.34592	4.57733	3.73946	8.55384	7.25451	9.78858	10.8768	13.0396	12.9365	2.52566	8.36214	2.65512	6.28204	7.9152	1.5781	0.975734	7.91121	6.26202	8.15419	7.24591	1.885	3.23619	3.4847	4.29402	3.19443	10.311	7.47584	4.43132	2.40464	2.50265	2.45364	4.94241	3.63418
C29	C29B	5.35449	5.26289	5.92486	4.18794	3.2464	3.35348	2.15046	4.85154	6.03416	4.10272	4.49981	4.33428	5.12298	5.27537	6.13814	5.65902	4.45382	4.87129	8.2245	6.53052	9.58845	8.38422	11.9746	11.2207	2.8843	7.08522	1.69237	5.86603	7.55173	0.663896	2.36013	7.73156	6.02228	7.52395	6.98885	2.44829	3.41448	2.18335	4.46434	2.48038	10.4151	7.46044	3.79788	3.24733	2.19802	2.84786	4.54616	4.04664
C29	C29B	4.89094	5.85099	6.83678	4.19014	3.37335	4.56217	2.93429	4.72697	6.04561	6.21682	6.10475	4.00156	5.37092	5.32169	7.90251	7.62727	4.91427	5.03367	8.72695	6.25744	10.4925	8.72383	13.4007	12.9142	3.14949	8.90971	3.40389	6.46421	8.56507	2.08348	2.33558	7.87775	6.18947	8.5079	8.72759	2.02325	2.95965	3.11928	4.75758	3.72421	10.2013	6.86508	4.43495	2.92858	2.63328	2.32518	6.19417	3.5913
C29	C29B	4.79327	6.42304	5.40387	4.20078	3.99902	3.0861	3.27986	4.80988	4.80344	7.06444	4.22238	4.34367	6.21657	4.64724	6.29524	7.25219	5.6944	3.95695	8.67162	5.88019	9.3047	10.1083	12.2607	12.352	1.63659	8.8855	4.11302	6.34857	7.78852	2.11448	0.45739	7.70768	6.49628	8.61786	7.65931	0.824154	3.84946	3.71836	3.38768	4.24052	9.96757	6.54385	4.14017	2.95294	2.39122	2.26538	3.98039	5.29291
C29	C29B	5.6175	6.3637	6.84858	4.52791	3.31808	3.58652	3.74499	4.83377	5.17014	6.19884	5.83543	3.15845	5.98368	4.34682	7.37084	7.6055	4.81944	4.14351	9.11153	5.97175	10.2411	8.10476	13.1296	11.5717	2.63079	7.5804	2.10823	6.23042	7.91225	1.06983	2.13501	8.53351	5.14986	8.90221	8.8142	2.65063	3.18511	2.44032	4.44485	2.97788	11.2318	5.58601	4.81884	3.06222	2.06276	1.86272	5.46441	3.87192
C29	C29B	4.61929	5.3827	5.73931	3.86425	3.31212	3.0255	2.96647	4.42537	5.63931	5.01579	4.03445	3.61591	5.02374	4.77898	6.21458	6.40335	4.82694	4.70861	7.26225	6.42889	9.01647	7.94292	10.5352	11.0666	1.59042	6.82931	1.98835	5.605	6.43236	0.906612	2.04124	6.95775	6.13819	8.07004	7.91662	2.19033	2.90452	2.52964	3.65141	2.81297	8.67976	7.29473	3.23433	2.89841	2.38186	2.77234	4.68636	4.35672
C29	C29B	3.9239	4.8684	7.50983	3.29522	3.53874	3.74426	3.11199	3.92308	7.95425	4.42137	4.81772	6.52828	4.67472	6.75664	7.77896	6.91981	3.46056	5.85302	7.3926	7.57383	9.30603	8.31615	11.809	11.1543	3.45309	7.6403	0.882644	6.97668	8.56317	0.704983	3.45222	7.54983	7.63716	8.38772	8.13945	2.48607	3.44308	2.37556	5.16145	2.49653	8.74814	8.94848	3.75521	2.89195	1.7269	5.07273	4.53571	3.14531
C30		6.66699	4.46606	6.75897	4.90348	2.88375	2.46552	2.90659	6.01113	5.0455	5.07529	5.81898	4.71105	4.37145	4.82473	7.0637	5.55822	4.06398	3.71343	9.0491	7.63644	11.0423	9.21319	12.0909	10.8457	2.72123	8.61032	1.4306	7.56097	9.19544	1.08279	1.21135	8.13376	6.52588	6.21609	6.12501	3.33778	3.43354	3.00213	5.02333	3.1843	12.1225	9.33117	4.60435	3.0038	2.50228	3.35275	5.65755	4.15415
C30		6.79294	4.97303	5.34547	5.44601	3.04577	2.19169	3.03505	7.26916	5.00062	6.04127	4.3784	5.35761	5.30118	4.73151	5.4001	6.55594	4.50948	3.71604	8.05265	9.30997	9.66035	10.6173	11.2857	12.2221	1.78261	8.36937	2.10518	7.20208	8.79912	1.42461	1.22609	6.79908	8.00684	6.74814	6.57531	1.26552	2.81884	3.33881	3.38306	4.31992	9.99378	12.3672	3.40222	2.63148	2.29843	5.15925	4.10536	4.64057
C30		7.68251	3.9062	6.74389	6.47262	2.37881	2.31439	4.27966	7.73297	4.25936	6.46067	4.34521	4.83854	3.39153	4.35864	7.49676	6.83387	3.41546	4.2709	8.61627	8.76855	10.4939	10.29	12.4713	11.5489	2.07569	7.99948	1.0169	7.17322	8.18557	1.2466	1.57701	6.19103	6.34947	7.47472	7.43467	1.61978	2.41408	2.13568	3.88117	3.7239	9.82574	10.1468	3.65694	2.05404	2.20125	3.69348	4.776	3.05948
C30	C30	7.28721	3.51568	6.36043	6.04252	2.65124	2.18637	3.35161	7.53083	5.09017	5.11611	4.29272	4.97133	3.16046	4.9781	6.84474	5.60655	2.98684	4.74582	8.17545	8.58957	10.0535	10.0887	11.5337	11.713	1.9044	7.70088	1.22673	6.71125	7.43929	0.865635	1.43427	6.11928	6.64813	6.67266	6.70421	1.01229	2.32151	2.15222	4.03891	3.14807	9.58017	10.5994	3.63429	1.88597	1.99576	4.11259	4.58856	2.97792
C30	C30	8.19202	3.52299	5.92213	6.28297	2.21529	2.22824	2.80051	7.73048	4.02032	4.89265	4.16226	3.67984	3.31038	3.96683	6.4622	5.12978	3.86307	4.19567	8.85577	8.03785	10.5071	9.81179	11.7766	11.4351	1.9595	8.04183	1.70026	6.67566	7.71616	1.25851	0.915159	6.51652	5.58487	6.17227	6.20566	1.49172	2.69355	2.09403	4.21449	3.04959	11.4989	9.51844	3.80591	2.35372	1.71836	3.38214	4.86152	3.91583
C30	C30	5.71032	6.65129	7.13714	4.75588	3.53173	2.91785	5.03422	5.40446	7.10069	5.94919	5.42776	5.24994	6.04595	5.67852	8.2291	8.26005	5.41866	5.04526	9.02335	7.78393	10.6536	9.67077	13.8614	10.774	2.85071	6.55463	0.584852	6.81315	8.40514	2.02867	3.09535	8.42556	7.11858	9.72848	9.46023	0.914807	3.40111	2.53226	4.06483	2.82167	10.8289	8.72915	3.98239	3.67572	1.98156	4.19184	5.4487	4.03373
C30	C30	6.64288	3.25514	7.0275	5.62988	2.47312	2.61511	3.62638	6.73454	5.26451	5.16002	3.66181	4.25743	3.00378	4.70098	7.36581	6.35167	2.9737	4.71684	7.90523	7.96149	9.50665	9.36072	11.4523	11.4714	2.24461	7.56937	1.1043	6.76446	7.71117	0.682838	2.03665	6.02856	6.1961	7.55688	7.59248	1.21863	2.59843	2.07713	4.4175	2.89154	9.07575	9.32539	3.40604	2.10799	1.89904	3.76642	4.1671	3.76982
C30	C30	7.2357	4.72542	5.79924	6.01468	2.55208	3.03961	3.15693	7.13293	4.31768	6.05748	4.13323	4.48033	4.40768	3.88336	6.26044	7.05506	4.19142	4.22304	8.39085	8.20256	10.5156	10.1304	12.8378	11.9738	2.43752	7.54118	1.82323	6.4864	8.09578	0.947716	1.83413	6.38303	6.13342	7.17628	7.09942	1.22876	2.90622	2.3314	3.62777	3.79594	9.87296	9.41161	3.28073	2.56991	1.58569	3.99156	4.59433	3.66512
C30	C30	6.29471	3.92264	6.70824	5.23307	2.44455	2.78987	3.60351	5.97346	4.11108	5.97727	3.8741	2.58512	3.51131	3.75045	7.45501	6.51887	3.4701	3.99046	8.00866	7.04159	9.11718	8.79203	11.1435	11.5565	1.80925	8.27786	2.39104	6.6203	7.59268	1.40467	1.03837	6.45923	5.38285	7.99068	8.00563	1.48242	2.58351	2.82035	4.25343	3.27896	9.56154	7.59299	3.53443	2.47328	2.76711	2.0026	4.18009	4.82807
C30	C30	7.86918	4.16904	6.30011	6.5288	2.4674	2.72389	3.49462	7.91408	5.13864	5.39025	4.26626	4.79067	3.77536	4.96654	6.99899	6.34025	3.76854	4.90258	8.66857	8.93047	10.7775	10.3804	12.1853	12.6932	1.67103	7.80941	1.56773	6.61044	7.42893	1.34876	2.13273	6.29096	6.49628	7.07747	7.17589	1.41673	2.72332	2.26261	3.89159	3.22328	10.0963	10.567	3.14569	2.61818	2.61313	3.41971	4.58354	3.49344
C30	C30	7.36895	4.09225	5.61825	5.87014	2.48022	3.04192	2.21327	7.34386	5.80336	3.87406	4.45217	4.55376	3.90706	4.6873	6.01219	5.53549	3.50851	4.59063	8.34044	8.22434	9.93947	9.56843	11.4322	12.1808	1.71883	6.63744	1.42894	5.88797	6.71685	1.03624	2.16516	6.39207	6.30256	6.28484	6.24087	2.70157	2.46672	2.30764	4.08817	2.48157	10.3796	10.1733	4.00633	1.89962	2.4924	3.29164	4.49991	3.3465
RCV	RCV	6.47503	6.23106	6.00333	5.2657	3.91358	3.07653	2.9593	5.85197	5.49386	5.56328	5.054	4.4063	5.52844	5.28741	7.1057	5.97815	4.74691	4.96232	9.0052	7.01845	10.1996	10.5614	13.2173	12.8644	2.25442	8.20946	2.82859	5.92321	7.17029	1.81815	1.12214	8.18948	6.15598	8.21879	7.48766	1.84124	3.40801	2.79934	4.01966	3.1479	11.0741	7.19443	3.82237	3.41981	2.19543	2.51384	4.6918	3.80544
RCV	RCV	5.53638	5.67025	6.57765	4.48959	3.68167	3.14447	3.10599	5.16992	6.48226	4.95494	4.88572	4.77734	5.52191	5.65671	7.02195	6.35416	5.25624	4.55649	8.5191	7.17615	9.82355	9.40698	12.4684	11.8487	2.67018	7.40565	1.49968	6.38976	8.11829	1.38049	2.15104	8.08552	6.73505	8.40296	7.74931	2.27922	3.38356	2.74382	4.46095	2.7189	10.4798	8.16196	3.86049	3.36758	2.42488	3.20395	5.08591	4.21323
RCV	RCV	6.31941	5.7069	6.72428	5.23259	3.8931	2.9672	3.43296	5.77762	5.45402	5.91138	5.32466	4.72266	5.32214	5.16358	7.45927	6.34592	4.57733	3.73946	8.55384	7.25451	9.78858	10.8768	13.0396	12.9365	2.52566	8.36214	2.65512	6.28204	7.9152	1.5781	0.975734	7.91121	6.26202	8.15419	7.24591	1.885	3.23619	3.4847	4.29402	3.19443	10.311	7.47584	4.43132	2.40464	2.50265	2.45364	4.94241	3.63418
RCV	RCV	4.53669	5.12988	6.57055	3.83283	3.34152	3.38263	3.16099	4.32572	5.50863	5.64771	4.61141	3.7143	4.51226	4.85015	7.40745	6.64626	3.95179	4.52414	7.27673	6.49742	8.46991	8.1265	11.4778	11.1988	2.61589	7.59055	2.12425	6.158	7.40366	1.3359	1.61508	7.06464	6.18747	8.50073	8.55261	1.66534	2.4773	2.38443	4.23677	3.21603	8.61272	7.25196	3.98811	2.21829	2.408	2.81801	4.68017	3.72228
RCV	RCV	5.35449	5.26289	5.92486	4.18794	3.2464	3.35348	2.15046	4.85154	6.03416	4.10272	4.49981	4.33428	5.12298	5.27537	6.13814	5.65902	4.45382	4.87129	8.2245	6.53052	9.58845	8.38422	11.9746	11.2207	2.8843	7.08522	1.69237	5.86603	7.55173	0.663896	2.36013	7.73156	6.02228	7.52395	6.98885	2.44829	3.41448	2.18335	4.46434	2.48038	10.4151	7.46044	3.79788	3.24733	2.19802	2.84786	4.54616	4.04664
RCV	RCV	4.22705	4.62566	6.40232	3.5363	3.38245	3.08714	2.7563	4.05335	5.89079	4.68401	3.99903	3.86184	4.33788	5.39716	6.82495	5.83961	4.10886	4.7117	7.01395	6.24922	8.61214	7.63264	11.7029	10.2866	3.52326	7.06172	1.40894	5.934	7.89965	0.920444	2.07516	6.93021	6.17059	7.90354	7.77596	2.78533	2.97107	2.32431	4.36861	2.64468	8.37296	7.13337	3.22683	2.8386	2.01347	3.14331	4.43061	4.09137
RCV	RCV	4.89094	5.85099	6.83678	4.19014	3.37335	4.56217	2.93429	4.72697	6.04561	6.21682	6.10475	4.00156	5.37092	5.32169	7.90251	7.62727	4.91427	5.03367	8.72695	6.25744	10.4925	8.72383	13.4007	12.9142	3.14949	8.90971	3.40389	6.46421	8.56507	2.08348	2.33558	7.87775	6.18947	8.5079	8.72759	2.02325	2.95965	3.11928	4.75758	3.72421	10.2013	6.86508	4.43495	2.92858	2.63328	2.32518	6.19417	3.5913
RCV	RCV	5.27411	5.4818	5.75179	4.19988	3.86377	3.37184	1.70993	4.66666	5.35806	4.58168	5.32122	3.82491	5.34888	4.66118	5.90336	5.41282	4.55662	4.22571	8.05826	5.97595	9.34207	8.97261	13.2625	11.4372	4.00396	6.77093	2.23596	5.49575	8.0172	0.353491	1.12224	7.84441	5.78211	7.17993	6.64308	3.11379	2.78555	2.79369	4.51863	3.12602	10.0676	6.28586	4.59691	2.26934	2.36494	1.91269	5.32996	3.2955
RCV	RCV	4.79327	6.42304	5.40387	4.20078	3.99902	3.0861	3.27986	4.80988	4.80344	7.06444	4.22238	4.34367	6.21657	4.64724	6.29524	7.25219	5.6944	3.95695	8.67162	5.88019	9.3047	10.1083	12.2607	12.352	1.63659	8.8855	4.11302	6.34857	7.78852	2.11448	0.45739	7.70768	6.49628	8.61786	7.65931	0.824154	3.84946	3.71836	3.38768	4.24052	9.96757	6.54385	4.14017	2.95294	2.39122	2.26538	3.98039	5.29291
RCV	RCV	5.64382	5.61183	7.07667	4.68655	3.8245	2.82043	3.89143	5.24043	6.47229	5.3093	5.18549	5.19208	5.43445	5.71674	7.74113	6.6138	4.6945	4.57623	8.63023	6.92387	9.61618	10.5018	11.4313	12.4761	1.26956	7.83659	1.88512	6.41983	7.15837	1.80603	2.09627	8.10724	6.45117	8.50708	7.42392	1.31095	3.53095	3.38113	4.4552	2.48368	10.3922	7.44245	4.41977	2.778	2.31209	2.84056	4.71994	3.7515
RCV	RCV	5.6175	6.3637	6.84858	4.52791	3.31808	3.58652	3.74499	4.83377	5.17014	6.19884	5.83543	3.15845	5.98368	4.34682	7.37084	7.6055	4.81944	4.14351	9.11153	5.97175	10.2411	8.10476	13.1296	11.5717	2.63079	7.5804	2.10823	6.23042	7.91225	1.06983	2.13501	8.53351	5.14986	8.90221	8.8142	2.65063	3.18511	2.44032	4.44485	2.97788	11.2318	5.58601	4.81884	3.06222	2.06276	1.86272	5.46441	3.87192
RCV	RCV	5.04911	4.37784	6.16785	4.24794	2.89891	3.53449	2.43893	4.83185	5.04596	5.04596	4.00652	3.79753	3.95233	4.3083	6.73594	6.14685	4.07733	4.05653	7.09553	6.42929	9.3549	8.60521	11.8306	11.0817	3.23698	7.16511	2.0955	5.78773	7.46331	0.984907	1.64646	6.38824	5.62193	7.17598	6.92431	2.34594	3.05641	2.74171	4.31948	3.12829	8.41266	7.12864	3.31361	2.37535	1.80829	3.01241	4.65233	3.94992
RCV	RCV	4.61929	5.3827	5.73931	3.86425	3.31212	3.0255	2.96647	4.42537	5.63931	5.01579	4.03445	3.61591	5.02374	4.77898	6.21458	6.40335	4.82694	4.70861	7.26225	6.42889	9.01647	7.94292	10.5352	11.0666	1.59042	6.82931	1.98835	5.605	6.43236	0.906612	2.04124	6.95775	6.13819	8.07004	7.91662	2.19033	2.90452	2.52964	3.65141	2.81297	8.67976	7.29473	3.23433	2.89841	2.38186	2.77234	4.68636	4.35672
RCV	RCV	5.43288	6.2445	4.98092	4.29348	2.81495	3.47343	2.58281	4.87521	4.27059	5.80258	4.78893	3.46187	5.69966	3.90081	6.07318	6.5979	5.35124	4.57893	8.24633	6.30069	9.63764	8.5982	11.941	10.7691	2.187	7.31541	2.42076	5.91949	7.48226	1.95678	1.56225	7.50159	5.47739	7.54412	7.30955	2.36796	3.05155	2.46751	3.368	3.71124	10.3701	6.92176	3.99724	2.99886	2.87496	1.7895	4.90998	4.22001
RCV	RCV	3.9239	4.8684	7.50983	3.29522	3.53874	3.74426	3.11199	3.92308	7.95425	4.42137	4.81772	6.52828	4.67472	6.75664	7.77896	6.91981	3.46056	5.85302	7.3926	7.57383	9.30603	8.31615	11.809	11.1543	3.45309	7.6403	0.882644	6.97668	8.56317	0.704983	3.45222	7.54983	7.63716	8.38772	8.13945	2.48607	3.44308	2.37556	5.16145	2.49653	8.74814	8.94848	3.75521	2.89195	1.7269	5.07273	4.53571	3.14531
RCV	RCV	5.70533	5.5544	5.99772	4.66979	3.21892	3.30601	2.93042	5.20795	5.23067	5.31435	5.38562	4.86935	5.04126	4.7272	7.10514	6.13062	5.04185	4.2225	7.98983	6.71372	10.0722	8.90884	12.2112	11.6911	2.45653	7.27691	2.11479	5.80126	7.2983	2.03812	1.4517	7.31564	5.72763	7.35672	7.14975	2.08713	2.85595	2.36658	3.94604	3.00927	9.76147	7.13004	3.51199	3.02279	1.76274	3.0101	5.67301	2.1611
RCV	RCV	5.23609	5.32949	5.49142	4.50132	2.73061	3.80145	2.77037	5.56416	5.50234	5.99655	3.98873	4.74045	4.60374	5.24784	6.88618	6.87827	4.36071	4.93447	7.27721	7.9651	8.66575	9.19523	11.6274	12.2323	2.09084	8.23158	2.75929	6.33292	7.58496	2.20097	2.00133	6.24751	7.20772	7.98599	8.04686	1.66204	2.49864	2.68685	3.44843	4.06106	8.39391	9.84286	3.33378	2.32309	2.42419	4.209	4.14236	4.14113
RCV	RCV	5.45893	5.15004	5.90197	4.60926	2.89037	3.52149	2.91993	5.3776	5.80235	5.08501	4.8015	3.93814	4.7035	5.28534	7.18201	6.20934	4.81199	5.15393	7.42203	7.34061	8.78393	8.66445	11.722	11.7526	2.31697	7.17184	1.87126	5.81565	7.17838	2.3355	2.02244	6.54627	6.35255	8.05371	8.15275	1.32869	1.87122	2.44921	3.75771	3.00774	8.74247	8.48347	3.0959	2.7588	3.33534	2.34723	5.24453	3.25738
RCV	RCV	5.52695	4.9153	6.1386	4.61319	3.29192	3.09977	2.8347	5.41519	5.79243	5.03796	4.19997	3.9041	4.57679	5.52899	6.86044	5.85114	4.48448	4.8414	7.63833	7.31113	8.99983	8.53278	11.5794	12.1441	2.28353	8.06898	2.43162	6.07645	7.40067	1.54531	1.82987	6.92093	6.55804	8.04575	8.05267	2.48562	2.61157	2.49681	4.08284	3.01405	9.13185	8.50794	3.36536	2.72254	2.57129	3.10067	4.57679	4.19742
RCV	RCV	6.23915	5.15916	5.48489	5.06472	3.71932	2.47037	2.45078	6.03339	5.81541	4.47762	4.5911	3.60917	4.95516	5.67034	5.88465	4.93367	5.02729	5.26329	7.99891	7.56425	9.06931	8.7896	11.6011	12.453	1.89934	7.77451	2.48488	5.67895	6.83795	1.0676	1.30386	7.23611	6.72472	7.55836	7.74029	1.16693	2.22047	2.52526	3.77334	2.76647	9.8348	8.8972	3.53553	2.665	2.65785	2.95438	5.12154	4.01086
RCV	RCV	4.94936	5.20446	6.04409	4.29149	3.84143	2.77509	3.13686	4.98075	6.09035	5.22954	3.85692	4.16896	5.01801	5.9188	6.60758	5.80756	5.18979	5.19536	7.08643	7.143	8.95561	8.37691	12.0266	11.648	2.93092	7.39976	1.98652	5.71282	7.84303	1.50809	1.57501	6.80632	6.89907	8.42146	8.40569	1.20012	2.65134	2.42419	3.67969	2.97954	8.10486	8.23821	2.77004	2.86548	2.92105	2.80389	4.68215	3.97243
RCV	RCV	6.02939	4.99862	5.24607	5.0749	3.00158	2.58748	3.03382	6.26078	5.13126	5.50657	4.01002	3.35709	4.93176	5.31377	5.6811	6.08299	4.90719	5.26467	7.53779	8.00286	8.69727	8.63889	11.4263	11.7785	1.91551	7.85422	2.23951	6.05764	7.57101	1.40693	2.05164	6.30868	6.89972	7.88397	8.38535	0.907146	1.88548	3.0395	3.16003	3.51905	8.82914	9.85446	3.76527	1.793	3.08384	3.11986	4.55525	4.59207
RCV	RCV	6.00946	4.99856	5.31829	4.9513	2.57992	2.88721	3.03309	5.9203	4.71146	5.45232	4.51829	3.80264	4.81279	4.26037	5.93897	6.55032	5.10691	4.2829	7.61682	7.49821	8.53349	8.19385	10.7373	11.6147	1.27767	7.39236	2.2589	6.00584	6.91653	1.56388	1.98446	6.36702	6.16398	7.83899	8.04391	1.3964	1.5715	1.98125	3.28991	3.36837	9.19371	8.87679	4.1289	1.68081	2.02889	3.58053	5.16475	3.22828
RCV	RCV	5.84836	4.03849	7.2549	5.03077	2.49849	3.48132	3.73478	5.83922	5.30158	5.97415	3.81861	3.5695	3.69151	4.74416	8.00363	7.2704	4.29387	4.80003	7.69946	7.56899	9.50815	8.61271	11.6836	12.1827	2.41956	8.46143	2.20577	6.82106	8.18055	1.53699	2.25947	6.30905	6.21496	8.82703	9.03792	1.14702	2.44652	2.44537	4.4831	3.32977	8.81118	8.61974	2.49825	3.30719	2.38316	3.29617	4.89501	4.40962
RCV	RCV	5.40819	3.63468	6.78539	4.59442	3.25924	2.9245	2.66842	5.34017	5.90026	4.38875	3.51373	4.32387	3.51035	5.65711	6.94374	5.5315	4.2849	4.83092	7.17191	6.96468	9.84689	8.3078	11.9634	11.4627	3.54663	7.69954	1.72484	6.14706	8.03548	0.424061	2.30264	6.3942	6.17106	7.47426	7.12375	2.60416	3.07071	2.28405	4.7342	2.4943	8.3601	7.95622	2.98475	2.52059	2.6525	2.58617	5.01261	3.81934
RCV	RCV	7.68003	5.51745	5.67969	6.17245	2.12219	3.73422	3.14274	7.14303	4.94366	5.47056	5.38832	3.87549	5.2307	4.30977	7.25543	6.92536	4.91325	4.62415	9.03057	8.1437	9.80012	9.76911	12.3774	12.9446	1.30684	7.44493	2.18994	6.13515	6.94943	2.91208	2.34082	6.96198	5.6846	7.96854	7.9499	1.20781	1.78199	2.00158	3.65311	3.18944	11.1619	8.90748	4.82514	1.79744	2.36628	2.91758	5.25293	2.9575
RCV	RCV	6.17776	5.43457	5.47482	4.96224	2.92627	2.46972	3.36689	6.17419	5.3853	5.51779	4.4964	4.90781	4.99733	5.33068	6.41076	6.10044	4.41019	4.97896	8.15147	8.19261	9.58304	9.60853	10.4065	12.2208	0.544882	8.43591	2.5131	6.54445	6.83536	1.80348	1.74567	7.11463	7.12916	7.4007	7.43418	1.68406	2.91622	2.42179	3.41282	3.45979	10.1469	10.1927	4.22358	2.25552	2.8495	3.6606	4.33371	4.19312
RCV	RCV	5.27981	5.63174	3.86839	4.43053	2.83891	3.42293	1.71016	5.30595	4.34172	5.20545	3.44231	3.06864	4.66492	3.95116	5.23621	5.80667	4.9236	4.14325	6.95514	6.72631	8.8412	8.61169	11.2923	11.0452	1.85477	6.33678	2.59321	5.09001	6.21088	1.82452	1.11575	5.96702	5.9021	6.78661	6.97686	1.11954	2.66726	2.86003	2.62699	3.8737	8.23437	7.98178	2.89032	2.40265	1.7215	3.41155	4.22275	4.64385
RCV	RCV	5.30249	5.10864	6.06651	4.46034	3.4677	2.82876	3.10383	5.06006	6.33975	4.32447	3.99918	3.39438	4.75561	5.62532	6.71518	5.8896	4.29429	5.40511	7.51086	6.72716	8.95722	7.86818	11.3671	11.2487	2.0675	6.30618	1.06793	5.47696	6.51516	1.37833	2.4571	6.9673	6.11432	8.20912	8.28263	0.971129	2.80683	2.34174	3.84168	2.16139	8.91041	7.42534	2.63827	3.40554	1.91903	3.11781	4.17506	4.27281
RCV	RCV	5.70082	5.1188	4.7171	4.76964	3.59224	2.65004	1.987	5.731	5.29611	4.59186	3.1956	3.48452	5.07957	5.16124	4.96916	4.96916	5.21872	4.64288	7.10514	7.35873	8.71186	8.8454	11.4905	12.338	2.43676	7.58337	3.03776	5.13143	7.11872	1.03863	1.13013	6.43954	6.59066	7.25115	7.06927	1.20791	2.84364	2.90787	3.22813	3.15313	8.38926	8.78144	3.15466	2.15642	2.55727	3.00359	3.92145	4.90538
RCV	RCV	6.37884	4.9508	5.30971	5.21399	2.84397	3.3757	2.16716	6.25576	5.39847	4.66407	3.866	3.45951	4.25388	4.64046	6.30925	5.73808	4.21944	4.44486	7.86635	7.63764	9.35285	9.36761	12.0876	11.8464	2.34169	6.60753	1.79737	5.65422	6.64591	1.51129	1.57054	6.5519	6.25288	7.27833	7.20265	1.96577	2.77272	3.00901	3.7494	3.10132	9.56492	9.03775	2.91436	2.98404	2.4343	3.13876	4.26093	4.86086
RCV	RCV	5.77301	4.34979	7.41746	4.9197	3.10745	3.34585	3.57464	5.4825	6.12731	5.04779	3.74136	3.22895	3.93338	5.2888	8.16403	6.79354	4.58989	5.11294	7.80068	7.0401	9.83504	8.1696	12.5586	11.7914	3.16885	7.30577	1.18327	6.36647	7.85602	1.45805	2.64776	6.85425	5.8702	9.13339	9.00138	2.7281	2.87726	2.37092	4.73449	2.44677	9.07459	7.45575	2.66621	3.42182	2.25105	2.7513	4.93905	4.59505
RCV	RCV	4.50421	5.31698	4.54755	3.84239	3.17578	2.55643	2.68289	4.57494	4.48167	5.53778	3.96085	3.16478	5.06708	3.99138	5.26729	6.1548	4.88029	3.80114	6.24707	6.84395	7.384	7.88331	10.3024	10.1724	1.81268	6.15226	1.91047	5.43599	6.90808	1.61595	0.964862	5.96876	6.38199	7.32763	7.68432	1.05614	1.7284	2.88	2.61476	3.63468	7.27749	8.14815	3.11972	1.88006	2.79867	2.79533	4.30184	3.87082
RCV	RCV	4.34987	5.00829	4.76049	3.60135	3.18857	1.77068	3.12854	4.41155	4.6936	5.2137	4.41393	4.03929	4.72434	4.5289	5.32192	5.46867	4.66	4.24923	6.33531	6.99239	7.26897	8.37866	8.74196	9.97648	0.663646	6.92553	1.89291	5.69297	6.13072	1.24713	0.700709	6.24412	6.65152	7.08887	7.23618	1.48661	1.50116	2.29398	2.72345	3.2844	7.6538	8.54351	4.1629	1.13581	2.17579	3.73563	4.81036	3.04187
RCV	RCV	5.15842	4.25637	5.86044	4.41613	2.85994	3.23555	2.56554	4.99886	4.31319	5.49069	3.64238	2.66999	3.86181	3.84763	6.34316	6.17339	3.94986	3.68681	6.59507	6.61972	8.27334	8.16903	11.5401	10.9987	3.0539	7.1377	2.31398	5.60962	7.33977	0.789288	1.17281	5.83373	5.54152	7.59412	7.68179	1.78312	2.05689	2.82872	3.84752	3.492	7.56781	7.27766	3.05769	1.95857	2.48115	2.34042	4.48631	4.10537
RCV	RCV	6.32329	4.99256	5.88139	4.89988	3.3134	2.8154	2.29736	5.58838	5.30281	4.30734	4.4469	4.74239	4.56004	5.06586	6.48118	5.0813	4.05434	5.035	8.58721	6.61493	9.91129	8.12038	11.8726	11.6494	2.27998	7.69415	2.20452	5.84232	6.75609	1.08153	1.70538	7.6926	5.63181	7.29184	6.96145	1.84919	3.31983	1.46486	4.37726	2.52076	11.0498	7.13244	3.46169	3.52572	1.33334	3.18332	4.45596	2.87402
RCV	RCV	6.2023	4.20814	5.72939	5.34393	2.87538	2.67468	3.01216	6.30076	4.9566	5.13867	2.94172	3.31813	3.83955	4.60991	6.2365	5.92123	3.77401	4.49001	7.31368	7.59661	8.59751	8.49267	11.663	11.4616	2.29282	6.83978	1.60335	5.66014	6.92555	0.92702	1.6004	5.78808	6.09055	7.71739	7.82811	1.35167	2.63221	2.46644	3.47798	3.04689	8.14149	8.73719	2.61087	2.40202	1.81632	3.56736	3.41949	4.56928
RCV	RCV	5.92362	4.98452	5.12318	4.95768	2.75669	2.90171	2.80108	5.69595	4.34251	5.37671	3.67291	3.05953	4.21221	3.95023	6.24958	5.95093	3.65074	4.10584	7.33033	6.98375	8.56619	8.11515	11.4271	10.9427	1.91882	6.51986	1.8215	5.46606	6.49372	1.64838	1.05195	6.13081	5.57222	7.67328	7.77216	1.46431	2.20012	2.15392	3.14946	3.26915	8.64217	7.72394	3.06654	2.38425	2.86311	2.01637	3.73816	3.88347
RCV	RCV	5.87851	5.59562	5.21976	5.2052	3.3528	2.97223	3.25158	6.08155	5.15199	6.03695	3.57347	4.30423	5.1839	4.95748	6.01118	6.90535	4.9449	4.62617	7.30278	7.71217	9.04048	8.85424	12.5251	11.9422	2.23382	6.95999	2.01438	5.57473	7.32177	1.56738	2.02832	6.07561	6.65284	8.33284	8.3159	1.42263	2.3093	2.20636	2.80451	3.6449	7.85429	8.83597	2.51087	2.57768	2.56632	3.15988	4.13397	3.48282
RCV	RCV	6.0316	4.72227	5.36126	4.94114	3.02071	2.51312	2.7267	5.7666	4.88419	4.75633	4.52454	4.05535	4.58349	4.24957	5.58572	5.73874	3.88618	3.95058	7.58648	7.02702	8.97031	7.98543	11.5983	10.796	2.39245	6.31484	1.36066	5.5359	7.20416	0.681251	1.53747	6.51508	5.82508	7.03423	7.22317	2.01499	2.00961	1.5597	3.49193	2.80337	9.21583	7.96946	3.50719	2.26394	1.77022	3.21657	4.66521	2.56042
RCV	RCV	5.34982	5.17923	4.70627	4.54621	3.3297	2.45998	2.61089	5.16586	5.03375	4.51181	4.29778	3.71059	4.69988	4.85536	5.74257	4.84106	3.95769	4.53959	6.97443	6.36527	8.36182	8.3324	10.6314	11.2308	1.37814	6.47185	2.30602	4.62371	5.49094	1.84896	0.888863	6.20983	5.6001	6.63355	6.80641	1.27225	2.37266	2.08054	2.85673	2.52444	8.10934	6.90858	3.27048	1.99134	2.25708	2.22618	3.9446	2.60673
RCV	RCV	5.57871	4.83258	4.72244	4.41991	2.37806	2.59417	2.59805	5.32208	4.64725	4.46823	4.38689	3.61312	4.43575	4.34257	5.61418	5.37354	3.92291	4.3311	7.24152	6.80329	8.21217	7.68367	10.2196	9.77009	1.53322	6.1089	1.1464	5.37081	6.24905	1.68646	1.7888	6.25895	5.64416	6.46642	6.64848	1.39797	2.06145	2.04464	3.08121	2.74516	9.14035	8.1369	3.00921	2.76176	2.22423	2.91669	4.23274	3.29669
RCV	RCV	5.08214	4.81181	5.19606	3.92852	3.26601	2.28573	2.18439	4.46495	4.50836	4.28412	4.83196	3.43912	4.73138	4.15031	5.34382	4.75251	4.06552	3.68635	7.63632	5.59354	8.44695	7.05306	10.5894	9.9479	2.23977	6.59045	1.91535	5.3398	6.91421	0.591839	0.81223	7.20844	5.24515	6.63705	6.40078	2.09062	2.25934	1.69103	3.80434	2.55167	9.77344	6.10528	3.24025	3.24867	1.51489	2.53425	4.76214	2.75266
RCV	RCV	4.82024	4.7497	5.38699	4.05395	2.63018	2.54141	3.35362	4.88253	4.45424	5.81343	4.39733	5.07596	4.35836	4.2831	6.11212	6.46834	4.15165	3.58677	6.72452	7.11085	7.97606	7.67936	10.251	9.8652	1.77268	7.13658	1.46566	6.16205	7.336	1.41876	1.62566	6.03219	6.34919	7.43865	7.43267	1.13893	1.67123	1.41962	3.11385	3.5884	7.97329	8.5636	3.46224	1.95428	1.47138	4.35836	4.77062	2.02776
RCV	RCV	5.18596	4.38873	5.23575	4.2749	2.75427	1.94599	3.2334	5.20979	4.19865	5.47007	4.17284	4.25067	3.89535	4.13113	5.84692	5.71909	3.38497	3.51933	6.99785	6.9149	8.08133	8.02236	9.68966	9.79968	1.22783	7.28909	1.6135	6.09343	6.61099	0.930149	0.944351	6.14012	6.14026	6.71996	6.77268	0.662818	2.09612	1.94951	3.17849	3.34674	8.47648	8.41322	3.62575	1.90201	2.02465	3.45684	4.23414	3.00188
RCV	RCV	5.54793	4.40534	6.33874	4.64396	3.12068	2.4949	3.37787	5.19549	4.3282	5.73334	4.13692	3.49159	4.15146	3.98513	6.64143	6.23453	3.73974	3.70738	7.39645	6.56026	8.73088	7.78521	11.591	10.6249	2.6214	7.27988	1.77829	6.04213	7.54932	0.573828	0.97727	6.60937	5.52925	8.01064	7.9003	2.46238	2.21002	1.76874	3.94182	3.13333	8.7926	6.96374	3.38648	2.41405	1.39503	3.20364	4.54675	3.15423
RCV	RCV	6.54308	3.48512	6.80623	5.59284	2.36852	3.1415	3.28673	6.28339	4.42412	5.45877	3.91682	3.59861	3.29125	3.64573	7.05306	6.72094	3.31738	3.69654	7.71943	7.19404	9.33206	8.82094	12.2161	11.6025	2.99558	7.27615	1.77887	6.09629	7.82402	0.538193	1.84721	5.83446	5.0972	7.69781	7.53639	2.22748	2.06582	1.79535	4.34181	2.94699	8.71659	7.38863	3.11879	2.21026	1.71394	2.80981	4.67771	2.80804
RCV	RCV	6.21171	4.28605	6.23632	5.36214	2.91139	2.96539	3.20645	6.06448	4.4466	5.82638	3.37562	2.81786	3.93269	3.9209	6.76676	6.50059	3.87203	3.73646	7.48278	7.25834	9.20967	8.99324	12.3654	11.6594	2.87321	7.0266	1.96999	5.87481	7.75281	1.04319	1.05003	6.02283	5.64717	7.86943	8.00742	1.73072	2.74978	2.82505	3.81071	3.36226	8.35517	7.72519	3.5045	1.75547	2.87148	1.98647	3.90022	4.69673
RCV	RCV	5.84334	4.52221	4.57307	5.14953	2.76713	3.3311	1.91713	6.23181	3.88534	5.81461	3.54003	3.98753	3.90496	3.64469	5.35283	6.20789	3.63918	4.65715	6.67932	7.54005	8.64232	10.7028	11.4801	12.7197	2.12423	7.89969	3.78338	5.49105	6.80802	1.11036	0.898681	5.09732	6.13971	6.15876	6.13724	1.16767	2.43151	3.18588	3.01794	4.37095	7.01568	9.01744	2.50758	1.76387	3.25161	2.23936	3.81273	3.59232
RCV	RCV	5.83085	4.25094	5.1165	5.08537	2.42394	2.71628	3.02958	6.3882	4.70919	5.55364	3.48629	4.43012	3.48696	4.43811	6.17499	6.18136	3.14749	4.988	6.91154	7.95249	8.38195	9.65516	10.0962	12.1734	0.929239	7.778	2.81003	5.86491	6.24755	1.48151	1.42766	5.22218	6.62842	6.93509	7.09761	2.38942	1.98876	2.36375	2.90376	3.61737	7.53373	9.98059	3.05686	1.5915	2.85776	3.29395	3.65651	3.37355
RCV	RCV	6.31904	3.96602	4.57138	5.24027	2.42442	2.57885	2.07664	6.52603	3.88618	4.93087	3.61136	3.69391	3.57967	3.82208	5.20776	5.10903	3.392	3.98726	7.21122	7.29357	8.3115	9.03653	10.9251	11.121	1.99595	7.38661	2.49814	5.49723	6.72425	1.15326	0.715576	5.41407	5.72563	6.09581	6.03352	1.15332	1.83864	2.15562	3.10251	3.46472	8.48665	8.96396	3.1928	1.68424	1.99985	3.15267	3.84741	3.15585
RCV	RCV	5.91765	4.16454	6.84882	5.29113	2.0442	3.27674	4.52641	5.94931	4.08832	6.98397	2.92286	3.50002	3.2884	3.49672	8.09771	8.16669	3.26234	3.68849	7.21763	7.33856	8.67142	8.75843	11.4847	11.1437	1.97271	7.26552	1.68444	6.26063	7.25794	1.73141	1.94575	5.32788	5.4703	8.87689	8.69445	1.92675	2.61736	2.28678	3.45194	3.61638	7.559	7.80509	2.24115	2.68394	2.54682	2.53136	3.28921	4.13419
RCV	RCV	6.15897	5.05696	5.68832	5.40788	2.77514	3.52551	3.13422	6.28849	4.84387	6.12736	5.06861	4.61066	4.28264	4.67185	6.96068	6.85934	3.68633	4.50289	7.27129	7.99234	9.27803	10.0831	12.409	12.5529	2.3159	7.76547	2.56035	5.85911	7.29704	1.93542	1.81184	5.73422	6.3659	7.29257	7.44248	1.05253	2.1955	2.74105	3.24913	3.83724	7.81112	9.09685	3.61976	1.35028	3.00751	2.78424	4.93557	2.08368
RCV	RCV	7.00753	4.54121	5.84272	5.85721	2.54052	3.13471	3.00413	6.84268	4.35855	5.7811	4.07905	3.78032	4.21354	3.85316	6.49383	6.64473	3.76736	4.26182	8.0807	7.95062	9.37839	9.96824	12.1848	12.413	2.12853	7.63046	2.3682	6.19731	7.61807	1.37792	1.49889	6.18982	5.87681	7.48217	7.3557	1.46258	2.30679	2.42774	3.69396	3.58911	9.41446	8.91475	3.75544	1.86575	2.61968	2.7129	4.11883	3.67801
RCV	RCV	6.62552	4.62914	4.64582	5.53448	3.15627	2.26965	2.32173	7.06009	4.58946	5.29386	4.25245	4.06735	4.53344	4.34316	4.89764	5.61187	3.80273	3.79978	7.43336	8.36582	8.99641	9.50674	11.5193	11.9034	2.04951	6.98283	2.15812	5.84764	7.48939	0.871934	0.657293	5.957	6.94295	6.37932	6.73347	1.15704	1.78917	2.80089	2.97211	3.78217	8.60545	10.6575	3.74545	1.27423	3.39815	2.82097	4.33061	3.43636
RCV	RCV	6.50533	5.31701	5.62989	5.5622	2.33379	3.16443	3.86161	6.33475	4.396	6.26386	5.01512	3.79138	4.52007	3.93629	7.31259	7.22391	3.95475	4.12431	7.8932	7.59963	9.16117	9.52829	11.4928	11.9113	1.00973	7.17323	2.07316	5.95727	6.56818	2.55853	1.75761	6.10477	5.64312	7.62234	7.82627	0.744806	2.03751	2.47544	3.05216	3.43377	8.97423	8.21034	4.14282	1.48626	2.57985	2.57008	4.68127	2.7246
RCV	RCV	6.32606	5.12638	5.12185	5.52999	2.2018	3.42338	3.33342	6.65885	4.28851	6.49883	4.85533	4.51837	4.14777	4.0333	6.99881	7.12096	3.76111	4.06836	7.46453	8.1394	9.2946	9.62103	11.4204	12.5525	1.1123	7.91745	2.85349	6.17652	6.84767	2.61614	1.44537	5.45799	6.38377	7.06039	7.51977	1.4788	1.99137	2.43592	2.74552	4.15977	8.08605	9.68178	3.46722	1.5383	2.30009	3.68683	4.65234	2.33688
RCV	RCV	5.83886	4.28026	5.91106	5.04713	2.20429	3.19184	3.41329	5.75725	3.94369	6.10519	3.90429	3.68293	3.57711	3.3831	7.07003	6.90681	3.27597	3.93305	7.0746	7.10652	8.94263	9.14256	11.4263	10.8291	2.2551	6.83847	1.78498	5.9157	7.23248	1.7647	1.26418	5.50589	5.3872	7.14078	7.34667	1.3207	2.45916	2.30485	3.38678	3.55453	7.89423	7.77387	2.83362	2.18535	1.84535	3.10174	3.81364	3.23927
RCV	RCV	7.06323	4.91875	5.50264	6.08552	2.71832	2.83523	3.42528	7.31115	4.78098	6.00619	3.98205	4.38026	4.72172	4.18891	6.42572	6.84922	4.12946	4.22892	8.09792	8.49442	9.61661	9.82865	11.8912	12.7082	1.30548	7.15715	2.1298	6.12767	7.10124	2.04792	1.35876	5.96714	6.54786	7.61382	7.80133	1.05356	2.25524	2.2729	3.09844	3.67151	8.92815	9.97852	2.46632	2.85799	2.54398	3.40505	3.84433	3.44683
RCV	RCV	5.6994	4.8876	5.57609	4.86461	3.01755	2.43373	3.47979	5.58077	3.8327	6.41318	3.95785	3.36578	4.50599	3.63699	6.18134	6.69056	3.82108	3.67235	7.2485	7.04807	8.5489	9.57648	11.0653	11.2666	1.65019	7.72551	2.54118	6.10548	7.29421	1.18899	0.666779	6.20215	5.88737	7.34299	7.37484	1.70021	2.65692	2.9872	3.15667	3.80239	8.34351	7.83535	2.74641	2.65631	2.63199	2.44074	3.77479	4.20364
RCV	RCV	7.00653	3.43819	6.26134	5.4984	2.16081	3.34357	2.10737	6.57	4.64678	4.44843	4.59541	4.09922	3.39478	4.02298	6.6823	5.45316	4.57176	3.8392	8.0579	7.49965	10.9531	9.1892	12.8	11.3674	3.86423	7.49554	1.65536	6.4275	8.92185	1.31906	1.56127	6.34119	5.47394	5.81584	5.78448	3.67507	2.83257	2.48165	4.77346	2.93857	10.2337	8.69702	3.8439	2.10123	2.10701	2.94878	5.61713	3.34212
RCV	RCV	7.52835	3.6558	5.78982	6.08025	1.72172	3.42013	2.48687	7.42683	4.22327	5.09498	3.5755	4.02136	3.08229	4.16074	6.82345	5.97543	3.61632	4.47099	8.36822	7.98227	10.041	9.56381	12.1354	11.8707	2.41481	7.9476	2.08561	6.36094	7.40561	1.63624	2.03247	5.90455	5.54837	6.58145	6.36663	1.50836	2.81942	2.10447	4.0835	3.34812	10.1901	9.43792	2.89996	2.77089	1.78764	3.46489	4.14297	3.91701
RCV	RCV	6.91876	4.17202	7.61216	6.15233	2.37636	3.74111	4.3613	6.91823	4.42357	7.3597	3.57609	4.09338	3.77753	3.65039	8.43415	8.54627	4.27725	3.69422	8.21627	8.14286	10.2044	9.31222	14.3774	12.4158	4.04084	7.86894	1.81493	6.85205	9.77666	1.62601	1.785	5.91596	5.86537	9.32396	9.36876	1.91915	2.54738	1.90021	4.24547	4.00018	8.61098	8.49842	2.73048	2.69508	1.98651	3.36896	4.57664	3.58592
RCV	RCV	6.55467	4.41095	6.3739	5.41978	2.57273	3.00203	3.34278	6.43065	5.59492	4.98588	3.74084	4.61387	4.01988	5.09826	7.08295	6.42788	4.03685	5.15874	8.25855	7.74314	9.80274	8.41243	12.8092	10.9785	3.0207	6.75557	0.565137	6.35955	7.95453	1.3978	2.49006	6.65672	6.18318	8.12461	8.07227	1.63608	2.88243	1.42126	4.10448	2.78147	9.9186	8.99214	3.22157	2.94897	1.93911	3.662	4.28412	3.70706
RCV	RCV	7.10926	4.48964	6.90106	5.75663	2.69202	3.50691	3.02453	6.49988	5.28364	5.13069	4.38973	3.99881	4.07759	4.8364	7.75878	6.45341	4.72637	4.94851	8.86147	7.4844	10.7751	9.19334	13.3511	12.3521	3.11351	7.95334	1.81585	6.51623	8.12374	1.67849	2.35456	7.22722	5.51465	8.18702	7.81199	3.05545	2.94531	1.85085	4.80177	2.81678	10.9087	7.80139	4.07088	2.646	2.07618	2.72766	5.37391	3.66384
RCV	RCV	6.73563	4.29393	6.60821	5.74863	2.5051	3.70929	3.09022	6.67699	4.58774	6.2195	3.89615	3.51093	3.70834	4.2451	7.52003	6.99648	4.59999	4.40463	7.96321	8.07416	10.5366	9.19328	13.4708	12.3034	3.52359	8.14272	2.13549	6.61489	8.64593	1.49447	1.61782	6.13934	6.11274	8.08797	8.43413	2.84489	2.47392	2.56576	4.25707	3.91974	9.0218	9.0671	2.9247	2.65349	2.91795	2.68658	5.31196	4.27862
RCV	RCV	7.54869	5.40952	5.94952	6.05908	2.92571	3.21453	2.97729	7.12197	5.29743	5.4195	4.46453	4.55404	4.8096	5.16172	6.83769	6.36028	4.29771	5.32105	9.04935	8.30908	10.4798	9.97691	13.1623	12.6936	2.19315	7.86154	1.92166	6.39891	7.45944	1.48242	2.18177	7.35965	6.36631	7.98711	7.76482	1.36676	3.0001	1.99467	3.96876	3.2925	11.2238	9.42889	3.62176	3.12582	2.19338	3.47124	4.50633	3.91485
RCV	RCV	7.37547	3.93032	6.04333	6.08522	2.26311	3.26282	2.70294	7.304	4.30052	5.57648	3.54117	3.82719	3.54572	3.70208	6.54276	6.58092	3.804	3.90021	8.24714	8.22384	10.3205	9.6604	12.7349	11.9946	2.82916	7.5267	1.8344	6.50798	7.94196	0.857223	1.6165	6.04636	5.93965	7.05739	7.01458	1.46239	2.93961	2.47278	4.09693	3.65631	9.73409	9.57168	2.94068	2.6591	2.28737	3.21563	4.32308	4.42772
RCV	RCV	5.83608	3.3374	7.77222	5.06054	2.45911	2.80354	4.37064	5.89933	3.65153	7.57849	4.23022	3.74934	3.23386	3.30742	7.88857	8.09398	3.25264	3.54304	7.66083	7.51571	10.3712	9.01373	12.167	11.1759	3.24699	9.17037	2.20951	7.77256	9.93792	0.267217	1.00546	6.15384	6.17826	7.93207	8.46705	1.39084	2.68197	2.65283	4.59457	4.3841	8.65992	8.59011	3.14816	2.53966	2.07856	3.56155	5.23415	4.10868
RCV	RCV	7.10263	4.40082	6.20851	5.88839	2.31614	3.69105	2.7884	7.12513	4.74797	5.89496	3.99335	4.05414	4.03097	4.23061	6.93264	6.99476	4.40216	3.90877	8.12496	8.64563	9.71019	9.59368	12.795	12.7824	2.81987	8.24368	2.33231	6.80028	8.54987	1.45684	1.93683	6.23373	6.56594	7.8624	7.88661	2.60194	2.29045	2.61439	4.14585	3.97429	9.57395	10.3459	3.30462	2.43029	2.23239	3.96728	4.80943	4.25839
RCV	RCV	6.796	3.71118	7.14247	5.91324	2.58735	3.48773	3.36874	6.6927	4.11388	6.57479	3.26843	3.70663	3.50127	3.62848	7.38271	7.40369	3.26505	3.77732	7.8695	7.85077	9.83647	9.26739	13.2817	12.6383	3.57267	8.43078	2.61883	6.61326	8.7723	0.443676	1.46555	5.8798	5.69854	8.25943	8.21815	2.59881	2.85222	2.15741	4.50035	3.95658	8.54295	8.29967	2.73836	2.51526	1.97041	3.13515	3.89068	4.0507
RCV	RCV	6.6914	4.33201	5.76379	5.44291	1.9844	3.66434	2.56337	6.82263	5.11071	5.18308	3.65487	5.00407	3.8732	4.65552	6.74703	6.52268	4.11185	4.23422	8.04208	8.21941	9.25062	9.26613	12.1201	11.6423	2.54504	7.54183	1.66101	6.50152	7.84728	1.76891	2.35521	6.21942	6.49555	7.38375	7.01325	2.28476	2.75875	1.90409	3.97699	3.49009	9.81261	10.2728	3.00791	2.89339	2.26353	3.91534	4.11047	3.82076
RCV	RCV	6.60205	4.65592	5.44559	5.28431	2.72324	2.58446	2.77759	6.53034	5.079	4.91278	4.70524	4.16936	4.13465	5.27387	6.28457	5.38691	3.87163	5.34461	7.96945	7.96583	9.36846	8.88671	11.4007	11.2941	1.85089	7.55561	1.6578	6.16306	7.01027	1.43728	1.86394	6.60692	6.50443	7.0344	7.24781	1.54261	1.89578	2.18062	3.61044	3.14251	9.92353	9.79786	3.69254	2.30879	2.48745	3.43814	4.97742	3.35541
RCV	RCV	6.02678	4.98753	5.86067	4.74381	2.54668	3.35272	2.63947	5.68597	5.02137	5.21338	4.26641	4.41038	4.5703	4.5703	6.65535	6.27051	4.2807	4.24796	8.1615	7.41002	9.20232	8.43893	11.8087	11.1862	2.44274	7.67787	1.83157	6.49447	7.85203	1.55514	1.93708	7.13842	6.21121	7.7861	7.47234	2.09725	2.8307	1.86598	4.10985	3.353	10.3586	8.82731	3.79634	2.86584	2.2797	3.39591	4.39537	3.99476
RCV	RCV	6.46052	5.29469	5.08693	5.18323	2.88266	3.25388	2.19257	6.18906	5.5843	4.3611	4.34353	3.886	5.0931	5.17781	6.07333	5.33515	5.29286	5.03627	8.04012	7.54706	9.34559	8.97484	12.2132	11.7739	2.42344	6.6543	1.71415	5.43674	7.01959	2.14203	1.83978	6.81625	6.17013	7.36419	7.26511	1.32349	2.36564	2.20799	3.569	2.80179	10.0029	8.86783	3.28232	2.89026	2.88825	2.58336	4.85473	3.8047
RCV	RCV	5.13554	4.63783	6.53512	4.74851	2.55068	3.36813	4.41213	5.3558	3.42813	8.22403	3.19865	3.58215	3.61685	3.18709	7.93533	8.54961	3.30258	3.6372	6.38064	7.17776	7.94963	9.87214	11.4981	11.5458	2.1431	8.10616	2.91878	6.41536	7.85251	1.86576	0.693749	4.96409	5.95929	8.83072	8.85207	0.762872	2.21914	2.88658	2.97706	4.7691	6.2178	7.8597	2.3468	1.9161	2.56293	2.82441	3.35714	3.78447
RCV	RCV	5.9767	4.09441	6.09562	5.19246	2.4172	3.08043	3.35529	6.19664	3.83336	6.73166	3.87028	4.09718	3.66632	3.71974	6.81326	7.09579	5.19789	4.05434	7.00937	8.01759	10.8422	9.33171	12.2729	11.2015	3.20866	8.09972	1.96014	6.70646	8.95133	1.31716	1.13141	5.45862	6.39963	7.01172	7.65466	2.52137	2.59325	2.59046	3.52226	4.39779	7.67244	9.49448	1.86417	2.97185	2.8533	3.15243	5.77911	3.76693
RCV	RCV	5.69064	4.66453	5.82251	5.01792	2.53763	3.08167	3.62801	5.88411	3.28196	7.56163	4.0169	3.55905	4.1086	3.04301	6.73568	7.9515	5.3124	3.35772	7.04591	7.56638	10.8644	9.0802	12.2918	10.8414	2.82999	7.91775	2.10205	6.82305	8.9866	1.54688	0.881271	5.55921	6.20565	7.1462	8.00207	2.10831	2.82495	3.00221	3.13213	4.85287	7.63024	8.73607	2.07885	2.86738	2.72778	2.94256	5.64673	4.20746
RCV	RCV	6.05211	4.40877	6.42645	5.42311	2.83027	3.39418	3.48466	6.3724	4.12557	7.28307	4.35776	4.06812	3.94787	3.71551	7.03994	7.90844	3.80503	3.76257	7.16276	8.17891	10.4223	9.58823	13.3801	11.8177	3.70977	7.82344	2.05703	6.6925	9.32229	1.03785	1.17596	5.53008	6.68022	7.51459	8.21857	2.42551	2.48797	3.05869	3.62486	4.71419	7.36647	9.4692	2.71286	2.01691	2.84071	3.23743	5.09749	3.48249
RCV	RCV	6.50046	4.36395	6.04511	5.80758	2.79099	3.23355	3.27503	7.04166	3.97245	7.30322	3.44119	3.98224	3.91683	3.64864	6.68051	7.7487	3.79605	3.68515	7.54852	8.51817	10.1091	9.77125	13.4841	12.0352	3.46941	7.93595	2.12065	6.87485	9.41386	1.11341	0.87403	5.50029	6.9037	7.55177	8.04316	2.36331	2.78139	3.23694	3.47394	4.9349	7.74318	10.2142	2.82556	1.94185	2.79155	3.50256	4.00866	4.67367
RCV	RCV	5.90967	5.28292	5.67683	5.223	3.00872	3.79449	2.88309	6.04657	3.5307	7.68294	3.5331	3.26757	4.3685	3.324	6.69211	8.03199	3.28203	3.63965	7.25324	7.7644	9.64283	9.6043	13.3137	11.7926	3.10733	8.2242	2.67487	6.72518	8.42983	1.21735	0.869698	5.90875	6.43891	7.76265	8.34165	1.18702	3.34784	3.59553	3.39295	5.40521	7.79804	8.79188	2.2316	2.83464	3.29348	2.42571	3.19854	5.477
RCV	RCV	5.88329	5.02157	5.8661	5.20764	3.19496	3.89599	2.54637	6.06539	3.76086	7.46381	4.10638	3.80201	4.39217	3.59246	6.53186	7.76069	2.74412	3.37764	7.23111	7.79762	9.97358	9.66596	13.6493	11.9223	3.66777	8.39228	2.72529	6.66784	8.4794	0.783951	0.831244	5.97134	6.60073	7.05285	7.75508	1.12157	3.64413	3.7307	3.7955	5.44256	7.75443	8.91337	2.04948	2.98939	3.02196	2.77409	3.17778	5.03532
RCV	RCV	5.59369	4.15785	6.54938	4.90482	2.98222	3.5555	2.8509	5.6482	5.30349	5.50807	4.01521	4.18314	3.82257	4.36188	6.96239	6.78012	3.74764	4.58169	7.20313	7.17354	9.79097	8.72201	13.2482	11.4404	4.12176	6.85609	1.58334	5.95862	8.32567	0.728274	1.741	5.999	6.08573	7.57994	7.88801	2.5729	2.64962	2.18378	4.29415	3.32531	7.965	8.03612	3.08432	2.1492	1.72892	3.55124	4.82568	3.19823
RCV	RCV	5.66969	5.00752	5.85939	5.0145	3.31408	3.59049	2.70656	5.80584	5.13973	5.98812	4.46069	4.03107	4.36379	4.43666	6.66509	6.85041	4.06802	4.38172	7.30471	7.34823	9.77015	9.11691	13.3831	11.783	3.49692	6.63651	1.93151	5.75487	7.82286	1.18206	1.2207	6.14609	6.42786	7.82557	8.02049	1.6509	2.19007	2.6325	3.72221	3.86361	7.95933	8.29929	3.16405	2.06779	2.05245	3.40277	5.2148	3.04411
RCV	RCV	5.17799	5.77435	4.38411	4.63125	3.02393	3.07344	2.98846	5.86435	4.11667	7.38832	3.63454	3.82886	4.31588	4.1497	6.30883	7.35635	4.05424	3.54976	6.60531	8.30435	8.52354	9.68248	11.1084	11.9099	1.08594	7.91419	2.89894	6.77032	7.39057	2.31249	0.0814927	5.51965	7.61188	7.3762	8.33732	0.906555	2.39306	3.77519	2.20441	5.32189	7.02659	10.4912	3.34357	1.31089	3.21616	3.73782	3.88527	4.97756
RCV	RCV	5.17384	5.20058	5.42943	4.50016	3.20435	3.1009	2.94066	5.41442	4.64868	6.47563	3.96503	3.53731	4.39583	4.5202	6.56105	6.63022	4.03272	4.03705	6.83162	7.73525	8.4671	9.82759	11.5817	11.6428	2.21151	7.86705	2.53304	6.31483	7.63114	1.64127	0.401149	6.10728	7.00793	7.79037	8.02555	1.31653	2.25392	3.76559	3.19885	4.36935	7.69321	9.30249	2.7163	2.4691	4.20895	2.04831	4.23084	4.82752
RCV	RCV	6.30527	4.58769	5.85678	5.6332	2.41811	3.70335	3.20976	6.67066	4.0687	6.98103	3.41433	3.9964	3.64878	3.70266	7.15201	7.62715	4.03553	3.93713	7.16058	8.37193	9.2133	9.9019	12.6935	12.2339	2.69905	7.7315	2.3375	6.40775	8.00233	1.75057	1.29548	5.16909	6.51238	8.04013	8.32632	1.8546	2.0403	2.63822	3.27362	4.65229	7.25615	9.76835	2.93238	1.59427	2.60324	3.48801	4.35002	3.74384
RCV	RCV	6.21896	4.74256	5.95984	5.60718	2.4587	3.35662	3.83424	6.68342	3.71593	7.78576	3.35633	4.05809	3.932	3.56455	7.29124	8.16553	4.25796	3.79782	7.31278	8.35491	9.36783	10.0966	12.9486	11.5211	2.78051	8.0597	1.90505	6.91253	8.90786	1.97546	1.10049	5.26873	6.69612	8.19671	8.41297	1.1103	2.38159	2.98571	3.01652	5.00909	7.38425	9.83098	2.5436	2.12861	2.63274	3.58655	4.10807	4.23795
RCV	RCV	5.66059	4.72507	6.7408	4.96547	2.91085	3.31009	3.83692	5.58243	3.80808	7.49946	4.20616	3.44028	4.20936	3.43145	7.47048	7.95032	3.72705	3.42924	7.40797	7.17178	9.27866	9.58421	12.4776	11.7609	2.84761	8.08383	2.73667	6.70639	8.70085	1.25083	0.733109	6.22406	5.93384	8.22365	8.40641	1.5451	2.73451	3.09126	3.84346	4.44835	8.21526	7.7258	3.03768	2.46241	2.58655	2.5859	4.35107	4.18749
RCV	RCV	6.62029	4.72673	6.51467	5.93114	2.80001	3.57646	3.69473	6.90981	3.72052	8.01248	4.36756	3.66706	4.17094	3.53002	7.33527	8.41328	4.30708	3.76978	7.73085	8.4759	10.5988	9.98651	14.6122	12.1417	4.17254	8.45451	2.19079	7.08187	10.2907	1.3831	1.06975	5.71139	6.65349	7.8285	8.64626	1.68066	2.68558	3.49821	3.59391	5.20542	7.89971	9.6	3.30402	1.6679	2.8043	3.23988	5.12168	4.23535
RCV	RCV	4.85475	4.42043	6.66837	4.4672	2.61476	3.40836	4.18045	5.0237	3.561	7.91369	2.80085	2.82235	3.55985	3.27856	7.77481	8.31723	3.32736	3.6932	6.26997	6.8489	7.99038	9.53175	11.4097	11.3476	2.47838	8.1359	2.9681	6.29611	7.88511	1.49684	0.836882	5.09395	5.83782	8.6789	8.86995	0.99701	2.88206	3.68813	3.27531	4.59868	6.30047	7.48979	2.29002	2.10338	2.82847	2.38484	2.95852	5.39054
RCV	RCV	5.09765	4.47139	6.60693	4.54602	3.15972	2.85651	3.86327	5.31702	4.63293	6.92214	4.07568	3.9803	4.26133	4.46901	7.03182	7.31842	4.31291	4.47334	6.89208	7.39057	10.0811	9.17726	11.9746	11.6423	3.09137	8.58608	2.61526	6.58091	9.04483	1.11579	1.17	5.99207	6.70712	7.50635	8.23233	1.76257	3.29104	3.22488	3.65033	4.0985	7.48752	8.58538	2.67761	2.45871	2.68141	3.2048	4.63895	4.51087
RCV	RCV	4.94967	5.81495	5.29798	4.56997	3.82757	2.05596	4.37693	5.53023	4.09647	8.31993	3.66223	3.72705	5.11082	4.0163	6.25914	8.41829	4.45303	3.91567	7.00151	7.5644	9.17298	9.54389	11.8562	10.2281	1.52445	7.75954	1.50164	7.05216	8.25025	1.46451	0.327638	6.09688	7.62198	8.2279	9.17711	1.20722	2.9282	3.65531	2.40857	5.07057	7.23866	9.16479	2.31142	2.69701	4.07137	2.26932	3.94322	5.15471
RCV	RCV	5.87132	4.87074	5.44518	5.02996	3.24719	2.70821	2.88225	6.189	4.748	6.12608	3.79626	4.63737	4.30996	4.6909	6.20838	6.22626	4.12521	4.54691	7.18359	8.24261	9.29376	9.70511	12.1363	11.4557	2.59537	7.79951	1.91826	6.3872	7.93567	1.2173	0.486524	6.1683	7.18979	7.2859	7.52232	1.26311	2.61847	2.62714	3.29334	4.17473	8.15851	10.137	3.26839	1.93287	2.70638	3.75493	4.2859	3.98084
RCV	RCV	5.72546	5.0224	5.69159	5.08693	3.05851	2.50033	3.96027	6.04109	3.21112	8.09351	3.74258	4.1797	4.56105	3.03962	6.39891	8.32843	4.58792	3.31032	6.85931	8.19005	8.55552	9.95262	11.7138	11.4915	2.00706	8.36398	2.4057	7.20034	8.80947	1.28845	0.573004	5.67471	6.95078	8.37804	8.47141	0.834686	1.72885	2.68834	2.75546	5.29045	7.23268	9.68009	2.76752	1.94626	2.68334	3.62672	4.58172	3.5313
RCV	RCV	5.34511	4.21882	6.99084	5.00987	3.04286	3.31974	4.144	6.10158	4.95536	7.84074	3.29273	4.74903	3.61311	4.68024	7.70046	8.36586	3.39706	4.27278	7.06029	8.05713	9.51642	9.77835	12.7969	11.6871	3.20161	8.33761	2.03571	6.97091	8.80726	0.9824	1.29282	5.39328	7.49006	8.41746	9.03656	1.33955	3.12351	3.04288	3.64933	4.80399	6.87762	9.8171	2.24076	2.4199	2.57398	4.07397	3.78751	4.54208
RCV	RCV	5.26811	4.79441	5.74181	4.60424	3.31068	3.26406	2.63373	5.5483	4.66645	6.43015	3.65701	4.19493	4.37634	4.43481	6.26523	6.7811	4.17139	4.36336	6.85642	7.74799	8.64456	9.45842	12.5572	11.628	3.38331	7.97137	2.45043	6.38622	8.61597	0.877756	0.853276	6.08307	7.03634	7.83644	8.06373	2.44836	2.39965	2.71951	3.66462	4.49784	7.64062	9.32751	2.8181	2.27565	2.0908	4.12811	4.28687	4.08996
RCV	RCV	5.77949	5.03831	5.73109	4.92753	3.30704	2.5894	3.28543	5.69171	5.16644	5.43939	3.78801	3.72777	4.85229	4.6121	6.06409	6.38267	4.82142	4.81642	7.54799	7.17754	9.49673	8.61681	12.1653	11.0918	2.60761	6.57228	1.37462	5.72043	7.65943	0.926506	1.62856	6.56002	6.22269	8.01688	8.16844	1.76023	2.62662	2.1066	3.41449	3.05384	8.73817	8.06781	1.86991	3.81672	2.07974	3.17368	4.65196	3.92006
RCV	RCV	5.45169	4.92469	6.00378	4.71459	3.16744	2.53898	3.74448	5.56738	4.80268	6.35772	4.25913	4.52816	4.66333	4.47063	6.52325	6.95982	4.60725	4.23958	7.34993	7.46365	9.65528	8.7077	12.1427	10.6428	2.77269	7.2211	1.32677	6.4	8.51569	1.24727	1.30251	6.3946	6.66997	7.79804	8.02501	1.79454	2.5239	2.27107	3.3805	3.72258	8.37672	8.74785	3.25235	2.33874	1.47085	4.36566	5.02639	3.35197
RCV	RCV	5.49712	4.06299	6.68339	5.03673	2.67906	2.96846	4.19884	5.91892	4.58764	6.98332	3.25373	4.2738	3.42204	4.35275	7.50582	7.61927	3.27759	5.34392	6.63704	7.8802	8.96931	10.2608	11.6854	11.2855	2.54772	7.579	1.69628	6.34796	7.77139	1.19516	1.55385	5.07764	6.63429	8.11453	8.34098	1.87674	2.53906	2.83602	3.30143	4.05692	6.52444	9.1693	2.56634	1.75052	2.59416	3.47492	3.71844	3.87061
RCV	RCV	5.03805	4.92362	6.64592	4.65424	3.28028	2.60661	4.80128	5.4305	5.12959	7.34119	3.82801	4.69285	4.18812	4.86823	7.49904	8.09266	3.4271	4.75706	6.51986	7.82468	9.19332	9.49806	11.17	11.3645	1.5915	7.50512	1.68192	6.32942	7.10834	1.13393	1.79789	5.56517	7.15635	8.30126	9.01764	1.66512	3.02776	2.81796	2.91297	4.02629	6.49514	9.08832	3.39584	1.13086	2.44987	3.88144	3.88522	3.7587
RCV	RCV	4.99376	5.49046	5.36857	4.81292	3.29291	3.37289	3.79997	6.04465	4.52459	8.61962	3.93448	5.54047	4.41482	4.46635	7.18681	8.9789	4.11321	4.39186	5.58966	9.34112	8.99584	11.0292	12.0121	13.0529	2.02449	8.7724	3.15816	6.85794	8.52348	2.505	1.35393	4.36872	8.63031	7.77494	8.66263	0.559094	2.69084	3.74772	1.97496	6.05947	4.17444	11.6628	1.26883	1.59515	5.00551	2.98457	4.0655	2.96603
RCV	RCV	5.51164	6.09234	5.21463	4.59596	3.35986	3.27302	2.79558	5.4477	5.55359	5.6222	4.76723	4.41334	5.63649	5.04258	6.20421	6.5775	4.86387	4.73701	7.67804	7.63057	8.7964	9.46871	12.52	11.4302	2.54683	6.85768	1.67977	5.91034	7.73152	1.90335	1.7514	7.05369	6.91138	7.91954	7.80405	1.9986	2.43706	2.80333	3.25461	3.60762	9.19305	9.01626	4.23921	1.94123	2.85492	3.21289	4.5179	3.80839
RCV	RCV	4.92334	4.08303	6.59284	4.3695	3.07216	3.44059	2.96215	5.2471	4.68836	6.68956	4.22238	4.91584	4.03383	4.18742	6.64338	7.49478	3.16768	4.10246	6.71935	7.5169	8.88524	9.65989	11.609	12.3093	3.0196	8.88916	3.32595	6.74923	8.61748	0.0959081	1.44645	5.87344	6.9333	7.306	7.55171	1.95122	2.74859	2.78728	4.2215	4.49847	7.37435	9.02242	2.66785	2.37989	3.23959	2.95237	4.46322	3.26825
RCV	RCV	5.1199	4.72233	5.61955	4.45814	2.97751	3.01325	3.01441	5.07398	4.12759	6.12153	4.06149	4.03155	4.24893	3.97178	6.48031	6.32376	3.82857	4.00924	6.55467	6.83413	8.51856	9.24233	11.418	11.2682	2.58994	7.58393	2.67934	5.71112	7.59757	1.56462	0.509787	5.78668	5.84002	7.06417	6.97992	1.68757	2.5717	2.77251	3.29066	3.81031	7.32534	7.60531	2.63714	2.2626	2.9578	2.14345	4.03935	3.14341
RCV	RCV	5.18743	4.59722	5.80815	4.42469	2.59578	2.97747	3.30217	5.08047	4.05514	6.13569	4.5535	3.65869	4.33153	3.8474	6.64324	6.57377	4.88255	4.19443	6.86768	6.81936	8.83172	9.44386	11.3444	10.6681	2.64634	7.62231	2.20112	6.06102	8.08451	1.80825	1.10775	5.94426	5.71747	7.19185	7.14889	1.30632	2.1162	2.86911	3.41396	3.67903	7.96102	7.68671	2.9174	2.40747	1.7398	3.41841	5.44771	3.19509
RCV	RCV	5.16374	4.84235	6.16245	4.41811	2.47919	3.75351	3.18304	5.10977	4.08276	6.80703	4.37606	4.2733	4.00988	3.38649	7.26309	7.73952	3.66233	3.56237	7.17761	7.06318	9.07431	9.15287	11.6907	11.1414	2.56973	7.66326	2.47585	6.63813	8.0125	1.54124	1.35454	6.19433	6.0247	7.58668	7.65351	1.58108	2.7342	2.57957	3.80573	4.366	8.32967	8.07794	3.05595	2.61351	3.28103	2.22492	4.49984	3.50032
RCV	RCV	4.61298	5.21693	6.34785	3.97627	3.61304	2.98735	3.36817	4.48306	3.68855	7.55054	4.09247	4.00497	5.09397	3.54941	6.48485	7.7233	4.34004	3.30112	7.03975	6.58155	9.12325	9.19911	12.4416	11.2956	3.47428	8.94902	3.30467	6.81652	9.59536	0.311679	0.43518	6.86596	6.34467	8.04012	7.7969	2.87753	3.38288	3.18354	3.83377	4.83044	8.14787	7.31524	3.06224	2.76554	2.04081	3.1886	4.34171	4.50836
RCV	RCV	3.90535	4.42842	7.94956	3.35828	3.81426	3.36676	3.46303	3.7832	6.32059	5.67023	4.60771	3.32483	4.08121	5.71586	8.37498	6.72379	3.67211	4.88982	7.15519	6.46237	8.91394	8.05976	10.8802	12.1782	2.64567	9.38477	2.96206	6.90794	7.92265	0.766208	1.85501	7.38019	6.71064	8.82187	9.07192	1.97587	3.05995	3.55329	5.27653	3.04675	8.31154	7.26324	3.41568	2.90348	3.24644	2.27965	4.95499	5.12312
RCV	RCV	5.93339	5.26087	5.03881	5.15341	2.29945	3.4939	3.15238	6.2617	4.70769	6.1619	4.3428	4.57737	4.72186	4.35356	6.67442	7.18305	4.89535	4.59958	7.1888	8.11394	8.51075	9.55501	11.7353	11.5366	1.8123	7.05347	1.84949	6.0379	7.34427	2.67456	2.02062	5.55909	6.62983	7.76863	7.79304	1.4177	1.51713	2.31018	2.76267	4.00998	7.95306	9.82437	2.74963	2.30754	1.79018	4.45792	4.82396	2.74963
RCV	RCV	5.33197	6.29003	5.24734	4.46952	3.81717	2.97633	2.8777	5.04019	3.13514	7.77088	5.38359	3.52618	6.03761	3.3365	5.77212	7.58315	4.45874	3.17529	7.95752	6.52488	10.6889	9.17687	13.346	11.3066	3.29086	7.8905	3.34083	6.92134	9.92931	1.31812	0.316047	7.46384	6.23024	6.78464	7.60434	2.32239	3.82341	3.4553	3.29374	5.34784	9.49326	7.08592	2.86883	3.62394	3.00705	1.8556	4.55962	4.55962
RCV	RCV	5.21859	4.16101	6.75162	4.57818	2.78702	2.55068	4.23577	5.19174	4.91686	5.93963	4.5935	4.01644	4.0538	4.67494	7.26652	6.849	4.04613	3.5281	7.14404	6.68939	9.05847	8.22553	11.0273	10.6566	2.24621	7.3149	1.52907	6.08344	7.73015	1.48571	1.99936	6.03898	5.72863	7.67378	7.81817	1.1672	2.3437	2.39132	3.71994	2.90737	7.9909	7.32759	3.02372	2.38314	1.89002	3.07055	5.03723	2.68811
RCV	RCV	4.40223	4.5595	6.65084	3.75318	2.24975	3.52652	3.78125	4.29653	4.22818	6.71297	4.46245	3.39024	3.90877	4.08198	7.8947	7.46313	4.0214	4.23358	7.0984	6.38187	8.54945	8.21146	11.1423	10.1458	2.67966	8.37789	2.19492	6.74777	8.37327	2.02222	1.83415	6.36171	5.69907	8.06678	8.05813	2.92287	2.49147	3.0653	3.99789	3.83603	8.32639	7.25366	3.47039	2.50981	2.6736	2.53987	4.81768	4.25192
RCV	RCV	4.88234	4.16309	6.76337	4.02817	1.82921	2.635	4.55066	4.71605	3.73723	6.81709	5.07075	3.05516	3.64202	3.98662	7.77964	7.45569	3.70748	4.56054	7.54503	6.64573	8.73154	8.19009	9.70385	9.65748	1.2252	8.81599	1.83792	7.37305	8.02519	1.76458	2.11462	6.54889	5.68044	7.84397	8.29018	1.84561	1.89847	2.77986	4.02776	3.70052	9.13961	7.73953	4.39115	1.92603	2.533	2.82125	5.44018	3.93456
RCV	RCV	5.19807	4.33978	6.36388	4.27859	2.18319	3.22405	3.40306	4.89591	3.90226	6.17921	4.91913	3.89651	3.98567	3.54494	7.43689	6.71534	3.89895	3.17892	7.33014	6.60208	8.37196	8.53708	10.3565	11.0365	1.77985	8.41973	2.77371	6.62035	7.73675	2.06185	1.02219	6.39863	5.42423	7.3732	7.22478	1.67326	2.06306	2.27947	4.02402	3.63479	8.90418	7.40841	4.13764	1.85612	1.96323	3.02352	4.98307	2.82908
RCV	RCV	5.43684	4.72864	5.79093	4.6424	1.78844	3.30665	3.88735	5.28742	3.67976	6.55071	4.52808	2.95923	4.41374	3.33429	7.35968	7.46016	4.26417	4.40971	7.18965	6.73688	8.23735	8.8417	10.4455	10.7146	1.29419	7.58382	2.30394	6.20218	7.13833	2.77283	1.74116	5.76725	5.20581	7.90736	8.15396	1.04359	1.59628	2.42158	3.1981	3.64418	8.31964	7.41278	3.67999	1.81131	2.53242	2.35911	4.5769	3.25331
RCV	RCV	5.52518	4.89062	7.37959	4.64712	2.78262	2.95573	4.58188	5.21362	4.72338	6.85492	5.29859	3.74351	4.87063	4.36595	8.03442	7.72829	4.50956	4.25912	7.95539	7.14784	9.14185	8.5349	12.4501	10.8956	3.05905	8.19319	1.52928	7.10148	9.49154	1.97629	1.809	7.1138	6.02269	9.11752	9.16055	2.29639	1.91774	2.29739	4.2591	3.51353	9.44638	7.79546	4.34881	2.17593	2.48133	2.89921	5.43432	3.25878
RCV	RCV	5.74749	4.61373	6.09216	4.82771	2.02726	3.00654	3.95879	5.42657	3.69902	6.40908	3.99933	3.2361	3.74144	3.36653	7.55972	7.13468	3.40114	3.62583	7.36753	6.85276	8.36205	8.39372	10.448	10.8726	1.22354	7.70931	2.23429	6.26292	6.87773	2.11822	1.45147	6.03823	5.15746	7.97892	7.91905	1.61732	2.25366	2.17864	3.43774	3.46845	8.68605	7.34382	3.78086	1.87138	2.69816	2.09728	3.91123	3.65048
RCV	RCV	5.12178	3.77401	6.95124	4.33072	1.97923	2.70974	4.37977	4.93866	3.92889	6.41291	3.0332	3.48256	3.47207	3.74708	7.7316	7.24938	3.84441	4.15896	7.21238	6.56189	8.72624	8.38291	10.5352	9.65201	2.14616	7.8184	1.37755	6.79857	8.15292	1.61671	1.86448	6.07925	5.33033	8.27393	7.87749	1.36409	3.33695	2.23967	4.01464	3.31149	8.50198	7.30374	3.74992	2.00633	2.24561	2.70692	3.58452	4.79749
RCV	RCV	5.39018	5.06751	5.38081	4.68589	2.24389	3.31234	3.5269	5.68864	4.54312	6.48375	4.06838	4.4854	3.96861	4.89314	7.15698	7.03249	3.77431	5.13364	6.98191	7.80349	8.37399	9.25818	11.0627	10.9947	1.58999	7.8945	1.98633	6.37008	7.21246	2.38473	2.2356	5.63573	6.63688	7.74203	7.82284	0.863824	2.00791	2.53996	2.90048	4.09658	7.83977	9.46532	3.0223	2.15139	2.71432	3.53013	4.19779	3.4037
RCV	RCV	4.93376	4.37582	7.34479	4.22453	2.18048	3.59895	4.25635	4.87781	4.61721	6.97049	4.60639	3.97593	3.35461	3.86675	8.83689	8.07917	3.33897	3.99344	7.70949	6.86303	8.90441	8.7715	10.4735	11.3857	1.49787	8.7375	2.60325	7.29085	7.79513	2.01673	1.67881	6.6429	5.99516	8.60206	8.73064	1.07842	2.58097	2.44296	4.41011	3.81325	9.00122	7.85122	4.6149	1.72002	2.24532	3.281	4.80654	3.89073
RCV	RCV	5.4586	4.87793	6.60648	4.5637	2.22836	3.30086	4.0724	5.20073	4.41846	6.52341	4.7111	2.858	4.622	3.89276	7.87545	7.47874	4.7377	4.17408	7.61198	7.11507	8.87604	8.90119	10.7221	11.3036	1.46928	8.14389	2.25866	6.75802	7.73981	2.53118	1.67237	6.58182	5.80321	8.27568	8.82446	1.90803	2.294	3.02988	3.84909	3.59214	9.08817	7.95403	4.25607	1.90423	2.9599	2.43179	4.9911	4.50907
RCV	RCV	4.90188	4.33619	6.13102	4.3393	2.5802	3.59929	3.08643	5.41822	4.96587	6.60391	2.52303	4.38577	3.44155	4.72482	7.16562	7.32275	3.7967	4.05912	6.43538	8.27479	8.58076	9.36666	11.9018	10.4669	3.29767	7.59568	1.22096	6.80855	8.07134	1.27404	1.72149	5.46004	7.44755	8.11839	7.97723	0.821192	3.43341	3.55727	3.66935	4.54999	7.03288	10.2907	3.23514	1.55469	2.82207	4.18647	3.23793	5.99689
RCV	RCV	5.34577	4.34733	5.82449	4.5722	1.83395	3.69078	3.17514	5.54489	3.21769	7.33301	4.72012	3.96214	3.70277	3.06459	7.11052	7.78152	3.62851	3.37518	6.92958	7.56953	8.40652	9.13392	10.8144	11.9617	2.02684	9.54082	3.61825	7.24547	8.58059	2.03431	1.18277	5.54959	6.27597	7.34238	7.59161	1.30913	1.57185	2.74798	3.50435	5.05803	7.97715	9.16978	4.12958	1.10871	2.5182	3.49261	4.95966	3.04876
RCV	RCV	5.68295	4.28476	6.51654	4.78176	2.21743	3.33085	3.54017	5.6887	4.23109	6.58114	4.67223	4.58903	4.15233	4.0988	7.09845	7.43933	4.25038	4.20543	7.46924	7.63828	9.39106	9.04048	12.3478	10.9668	3.43532	8.43282	1.91971	7.08702	9.73437	1.57123	2.00941	6.19827	6.30895	7.4494	7.6454	3.09622	2.31433	2.28082	3.99992	4.10594	8.80921	9.03821	3.80776	1.96586	2.34237	3.582	5.1681	3.08758
RCV	RCV	6.6147	4.17337	6.55733	5.2378	1.99912	3.17468	3.32322	6.19552	3.99813	6.05255	4.45112	4.6039	3.97175	3.82051	7.13641	6.89391	3.78593	3.74785	8.23322	7.64661	9.58836	9.12245	12.2335	10.9669	2.91959	8.45875	1.75417	7.23943	9.18766	1.44239	1.86996	6.76139	5.81921	7.22678	6.93738	2.53753	2.86657	2.02931	4.3758	3.74047	10.3932	8.8815	4.09498	2.33924	0.81855	4.67605	4.50376	3.50676
RCV	RCV	5.14	4.49945	6.90201	4.41099	2.84463	3.14063	3.7991	5.27442	5.3601	6.33953	4.44773	5.2003	4.13994	4.8945	7.47662	7.38008	3.61855	4.33719	7.20235	7.91818	9.01789	8.81156	11.8745	11.0252	2.98446	8.00681	1.43761	7.04768	8.88437	1.17485	1.98831	6.43823	7.08962	8.07262	8.38523	2.64764	2.59053	2.17641	4.09483	3.82658	8.33301	9.46822	4.09071	1.65567	1.88168	4.65405	4.57391	3.31234
RCV	RCV	5.08165	4.70442	6.88048	4.2666	3.24656	2.64834	3.8319	4.85353	4.74112	6.32372	4.97868	4.914	4.47134	4.43021	7.24351	6.85489	4.06247	3.70249	7.52715	6.85605	10.4139	9.21098	11.7362	10.8246	2.80056	8.14781	1.92262	6.75578	8.66739	0.901079	1.17037	7.04338	6.23015	7.08352	7.01556	1.21146	3.81141	3.11597	4.19107	3.49619	8.96165	7.68057	4.23512	1.99835	2.01827	3.33088	4.91173	3.61505
RCV	RCV	6.19495	4.6451	5.91437	4.99791	2.48838	3.0055	3.02521	5.98998	3.97705	6.23304	4.50004	4.44776	4.40377	3.65959	6.34074	6.92722	4.8103	3.63808	7.92068	7.59781	10.0337	8.81935	12.3727	10.8135	3.04668	7.9971	1.80395	6.94381	9.12609	1.03702	1.44169	6.67816	6.19221	7.373	7.31691	2.13701	2.37386	1.96663	3.88783	4.08452	9.80539	9.02447	3.79443	2.39115	2.33669	3.35133	5.61355	3.35313
RCV	RCV	7.28721	3.51568	6.36043	6.04252	2.65124	2.18637	3.35161	7.53083	5.09017	5.11611	4.29272	4.97133	3.16046	4.9781	6.84474	5.60655	2.98684	4.74582	8.17545	8.58957	10.0535	10.0887	11.5337	11.713	1.9044	7.70088	1.22673	6.71125	7.43929	0.865635	1.43427	6.11928	6.64813	6.67266	6.70421	1.01229	2.32151	2.15222	4.03891	3.14807	9.58017	10.5994	3.63429	1.88597	1.99576	4.11259	4.58856	2.97792
RCV	RCV	8.19202	3.52299	5.92213	6.28297	2.21529	2.22824	2.80051	7.73048	4.02032	4.89265	4.16226	3.67984	3.31038	3.96683	6.4622	5.12978	3.86307	4.19567	8.85577	8.03785	10.5071	9.81179	11.7766	11.4351	1.9595	8.04183	1.70026	6.67566	7.71616	1.25851	0.915159	6.51652	5.58487	6.17227	6.20566	1.49172	2.69355	2.09403	4.21449	3.04959	11.4989	9.51844	3.80591	2.35372	1.71836	3.38214	4.86152	3.91583
RCV	RCV	5.71032	6.65129	7.13714	4.75588	3.53173	2.91785	5.03422	5.40446	7.10069	5.94919	5.42776	5.24994	6.04595	5.67852	8.2291	8.26005	5.41866	5.04526	9.02335	7.78393	10.6536	9.67077	13.8614	10.774	2.85071	6.55463	0.584852	6.81315	8.40514	2.02867	3.09535	8.42556	7.11858	9.72848	9.46023	0.914807	3.40111	2.53226	4.06483	2.82167	10.8289	8.72915	3.98239	3.67572	1.98156	4.19184	5.4487	4.03373
RCV	RCV	6.64288	3.25514	7.0275	5.62988	2.47312	2.61511	3.62638	6.73454	5.26451	5.16002	3.66181	4.25743	3.00378	4.70098	7.36581	6.35167	2.9737	4.71684	7.90523	7.96149	9.50665	9.36072	11.4523	11.4714	2.24461	7.56937	1.1043	6.76446	7.71117	0.682838	2.03665	6.02856	6.1961	7.55688	7.59248	1.21863	2.59843	2.07713	4.4175	2.89154	9.07575	9.32539	3.40604	2.10799	1.89904	3.76642	4.1671	3.76982
RCV	RCV	7.2357	4.72542	5.79924	6.01468	2.55208	3.03961	3.15693	7.13293	4.31768	6.05748	4.13323	4.48033	4.40768	3.88336	6.26044	7.05506	4.19142	4.22304	8.39085	8.20256	10.5156	10.1304	12.8378	11.9738	2.43752	7.54118	1.82323	6.4864	8.09578	0.947716	1.83413	6.38303	6.13342	7.17628	7.09942	1.22876	2.90622	2.3314	3.62777	3.79594	9.87296	9.41161	3.28073	2.56991	1.58569	3.99156	4.59433	3.66512
RCV	RCV	6.29471	3.92264	6.70824	5.23307	2.44455	2.78987	3.60351	5.97346	4.11108	5.97727	3.8741	2.58512	3.51131	3.75045	7.45501	6.51887	3.4701	3.99046	8.00866	7.04159	9.11718	8.79203	11.1435	11.5565	1.80925	8.27786	2.39104	6.6203	7.59268	1.40467	1.03837	6.45923	5.38285	7.99068	8.00563	1.48242	2.58351	2.82035	4.25343	3.27896	9.56154	7.59299	3.53443	2.47328	2.76711	2.0026	4.18009	4.82807
RCV	RCV	7.86918	4.16904	6.30011	6.5288	2.4674	2.72389	3.49462	7.91408	5.13864	5.39025	4.26626	4.79067	3.77536	4.96654	6.99899	6.34025	3.76854	4.90258	8.66857	8.93047	10.7775	10.3804	12.1853	12.6932	1.67103	7.80941	1.56773	6.61044	7.42893	1.34876	2.13273	6.29096	6.49628	7.07747	7.17589	1.41673	2.72332	2.26261	3.89159	3.22328	10.0963	10.567	3.14569	2.61818	2.61313	3.41971	4.58354	3.49344
RCV	RCV	7.36895	4.09225	5.61825	5.87014	2.48022	3.04192	2.21327	7.34386	5.80336	3.87406	4.45217	4.55376	3.90706	4.6873	6.01219	5.53549	3.50851	4.59063	8.34044	8.22434	9.93947	9.56843	11.4322	12.1808	1.71883	6.63744	1.42894	5.88797	6.71685	1.03624	2.16516	6.39207	6.30256	6.28484	6.24087	2.70157	2.46672	2.30764	4.08817	2.48157	10.3796	10.1733	4.00633	1.89962	2.4924	3.29164	4.49991	3.3465
RCV	RCV	6.66699	4.46606	6.75897	4.90348	2.88375	2.46552	2.90659	6.01113	5.0455	5.07529	5.81898	4.71105	4.37145	4.82473	7.0637	5.55822	4.06398	3.71343	9.0491	7.63644	11.0423	9.21319	12.0909	10.8457	2.72123	8.61032	1.4306	7.56097	9.19544	1.08279	1.21135	8.13376	6.52588	6.21609	6.12501	3.33778	3.43354	3.00213	5.02333	3.1843	12.1225	9.33117	4.60435	3.0038	2.50228	3.35275	5.65755	4.15415
RCV	RCV	6.79294	4.97303	5.34547	5.44601	3.04577	2.19169	3.03505	7.26916	5.00062	6.04127	4.3784	5.35761	5.30118	4.73151	5.4001	6.55594	4.50948	3.71604	8.05265	9.30997	9.66035	10.6173	11.2857	12.2221	1.78261	8.36937	2.10518	7.20208	8.79912	1.42461	1.22609	6.79908	8.00684	6.74814	6.57531	1.26552	2.81884	3.33881	3.38306	4.31992	9.99378	12.3672	3.40222	2.63148	2.29843	5.15925	4.10536	4.64057
RCV	RCV	7.68251	3.9062	6.74389	6.47262	2.37881	2.31439	4.27966	7.73297	4.25936	6.46067	4.34521	4.83854	3.39153	4.35864	7.49676	6.83387	3.41546	4.2709	8.61627	8.76855	10.4939	10.29	12.4713	11.5489	2.07569	7.99948	1.0169	7.17322	8.18557	1.2466	1.57701	6.19103	6.34947	7.47472	7.43467	1.61978	2.41408	2.13568	3.88117	3.7239	9.82574	10.1468	3.65694	2.05404	2.20125	3.69348	4.776	3.05948
RCV	RCV	4.7357	6.60473	4.1667	4.31831	4.04991	3.22018	2.55197	4.9755	4.33062	6.98625	4.06811	3.89621	5.59498	4.38869	5.7805	6.93431	4.80134	4.21668	6.02624	7.26585	8.18913	9.88934	12.4043	11.973	2.08226	7.40303	3.22232	5.65569	7.43476	2.25343	0.189426	5.9316	7.00284	7.62391	8.02472	1.15056	2.43937	3.32575	2.08573	4.96552	6.149	8.31607	2.5238	1.74736	2.96642	2.81063	3.99956	3.42828
RCV	RCV	4.50834	5.71732	5.0055	3.83775	3.02954	3.4302	2.66814	4.36709	4.04367	6.34321	4.87157	3.04124	5.25549	3.79608	6.22803	6.6709	4.93322	4.08875	6.74185	6.33573	8.23877	8.5327	11.0611	11.3601	2.08434	7.77973	3.40193	5.80458	7.48906	2.22641	0.689088	6.35597	5.84331	7.4467	7.86577	0.971848	2.03734	2.94664	3.05718	4.20893	7.90888	7.12538	3.78024	1.7879	2.67271	2.34363	5.02747	3.47949
RCV	RCV	5.68243	6.29357	4.58922	5.08229	3.32614	3.65722	2.75007	6.21121	4.49656	7.39894	4.6354	4.61773	5.36656	4.22156	6.33684	7.88002	4.63603	4.2025	6.97771	8.59024	9.00879	10.5961	12.7166	12.9981	1.92969	8.14053	3.24068	6.60092	8.13721	2.54645	1.13459	5.86489	7.63839	7.63466	8.08661	1.3759	2.24681	3.51136	2.44598	5.3988	7.32307	10.4963	3.34016	1.47297	3.36454	3.5314	4.49338	3.49281
RCV	RCV	4.10404	6.50819	5.37476	3.76011	5.27247	2.8016	2.81306	4.20482	7.09084	5.08392	5.28614	4.90647	6.21559	6.61052	5.79781	5.80781	4.22516	5.7433	6.21615	6.46942	10.3033	8.79097	12.2355	12.664	2.52456	6.45062	2.55515	4.44708	6.3596	0.951187	1.35794	7.15363	7.53227	7.05903	7.73609	1.41049	4.16905	3.81895	3.04223	2.83251	6.59549	7.14737	2.55543	2.34906	1.8938	3.42393	4.50773	3.18472
RCV	RCV	6.38548	7.54005	2.88052	5.36437	4.59076	2.36316	1.80027	6.41105	5.35964	5.10265	4.67886	4.40065	7.0224	5.10052	4.0661	5.42432	6.13345	4.40778	7.81002	7.83135	9.86875	10.1734	12.6894	12.6073	0.981591	5.5745	2.43556	4.73317	5.58632	1.96861	0.642494	7.28741	7.33615	6.65261	6.71749	1.2012	2.78636	3.07317	1.68371	3.72672	9.14008	9.21631	3.20368	2.46542	2.51727	3.20851	4.54071	3.57679
RCV	RCV	5.1578	5.88278	5.24067	4.54384	3.604	3.53616	2.6592	5.21347	5.00296	6.24056	3.93533	3.67218	5.17897	4.5358	6.3929	6.7746	4.5558	3.96584	7.00087	7.09598	8.50665	9.4814	12.4337	12.1842	2.45851	6.75893	2.79025	5.60036	7.40368	1.84965	0.787024	6.40144	6.56378	8.04122	8.02657	1.1518	2.74358	3.34642	3.16853	4.1254	7.76665	8.00662	2.92967	2.37769	2.84172	2.62859	3.83647	4.43458
RCV	RCV	3.85969	7.11775	3.96905	3.45042	4.55439	2.77852	2.57829	3.98391	5.13497	6.30867	4.79991	3.70547	6.10758	5.20055	5.44489	6.25157	4.90379	4.5179	6.26549	6.4633	7.84839	9.20626	11.6379	10.8627	1.66193	6.77838	2.63088	5.29404	6.61354	2.03393	0.227748	6.81883	7.23342	7.64228	8.15617	0.673837	2.49453	3.41492	2.07089	4.23889	6.9612	7.45829	3.46583	1.69828	2.40014	3.13217	4.43194	3.53324
RCV	RCV	4.81032	5.40659	5.13679	4.27149	2.97352	2.95974	3.4291	4.93996	3.4076	7.41995	4.09199	3.46891	4.48483	3.30696	6.42106	7.57123	4.22011	3.62397	6.43658	6.94231	8.1268	9.2737	11.1954	10.7671	1.84607	7.97783	2.71297	6.36567	7.68143	1.78031	0.500665	5.67438	6.21259	7.77598	8.00793	0.900297	1.99	3.00711	2.61201	4.78293	7.02715	7.95415	3.24952	1.58447	2.91614	2.5474	4.49455	3.54606
RCV	RCV	5.18889	4.60713	4.80775	4.36639	2.39097	2.83334	2.69821	5.16225	3.69119	5.67537	4.08739	3.42227	4.13373	3.3544	5.66573	6.25359	3.90874	3.70132	6.70366	6.63561	8.57556	8.2797	10.6222	9.99572	2.01732	6.70872	1.94129	5.67544	7.08609	1.51135	1.13158	5.62054	5.5392	6.32287	6.67868	1.19606	2.2426	2.46759	2.92621	3.6858	7.89004	7.7504	3.15614	1.94397	2.25117	2.74624	4.32981	3.33866
RCV	RCV	5.58264	3.59599	5.0296	4.86119	2.14569	2.65396	2.71124	5.80481	3.67628	5.29258	3.26518	3.22781	3.16844	3.35244	5.77148	5.7707	3.19844	3.40531	6.64497	6.70388	8.33574	8.29034	10.1528	10.5365	1.73005	6.71723	2.21372	5.36973	6.44783	1.28617	0.908288	4.86739	5.23957	6.10464	6.29562	1.19917	2.20127	2.47052	3.03702	3.31321	7.27906	7.79224	2.94499	1.48452	2.36105	2.37006	3.60374	3.46061
RCV	RCV	4.68129	3.85912	5.19755	3.80531	3.1032	2.54827	1.7105	4.43141	4.36429	4.20896	3.2397	3.18418	3.76328	4.12638	5.30067	4.53186	3.36118	3.80429	6.49953	5.81667	8.1724	7.42021	10.6005	9.86126	3.03012	6.77167	2.08712	5.21999	6.81431	0.205028	0.667142	6.11811	5.38066	6.26397	6.12649	2.30335	2.93005	2.11581	3.93464	2.87759	7.99565	6.67013	2.51103	2.76035	1.81163	2.58597	3.59827	4.01251
RCV	RCV	4.72267	3.55051	5.24347	3.87566	2.23522	2.48239	2.49916	4.63985	3.91312	4.72665	3.72474	3.49887	3.29808	3.56749	5.64035	5.33388	3.36774	3.5415	6.25048	6.22581	7.88739	7.48744	9.37897	9.38662	2.02247	6.76747	1.76468	5.60697	6.78204	0.844506	1.16295	5.45047	5.29983	6.0562	6.04602	1.63654	2.01358	2.11159	3.47418	2.99964	7.60307	7.4239	3.44754	1.50367	1.89323	2.93769	4.30642	3.09005
RCV	RCV	4.68455	3.69631	5.31635	3.98073	2.72288	2.61693	2.31877	4.59945	3.70837	5.14057	3.95298	3.09165	3.4562	3.51107	5.57295	5.43287	2.8557	3.42255	6.20532	5.95116	8.23551	7.78345	9.97121	10.1598	2.32683	7.31458	2.62566	5.3782	6.35891	0.364572	0.683915	5.47946	5.19905	5.85806	6.12521	1.42023	2.35331	2.6944	3.56367	3.34069	7.22979	6.72787	2.72763	2.03022	2.2019	2.23498	4.18459	3.27347
RCV	RCV	4.64877	4.24425	5.4696	4.02382	2.85128	2.96487	2.59184	4.49877	3.35862	6.0418	3.91662	3.44636	3.74575	3.27848	6.08002	6.12464	3.40635	2.78603	6.31314	5.81934	8.54437	8.48932	10.3544	10.7964	2.18512	7.24835	3.27602	5.48216	6.80454	0.915242	0.135094	5.63865	5.0797	6.35244	6.3368	1.274	2.8348	2.79959	3.47751	3.89982	7.19269	6.21591	2.88524	1.98552	2.40903	1.8107	4.08388	3.30314
RCV	RCV	4.15563	2.58359	6.30367	3.76512	2.89206	3.19667	1.9634	4.27606	4.5387	4.60612	2.60227	3.33239	2.80269	3.96755	6.10021	5.31846	3.17803	3.5457	5.47687	5.58331	8.29488	7.26496	10.5426	10.4845	3.79101	7.03078	2.49733	5.1289	6.67472	0.321537	1.03036	4.82092	5.13534	6.55064	6.58806	1.60374	2.67005	2.06267	4.62181	2.99918	5.73804	6.15143	1.87201	2.05451	2.06608	2.12628	4.03146	3.28264
RCV	RCV	4.44533	3.02413	5.66278	3.86754	2.23312	2.73505	2.58965	4.45289	3.91315	4.78852	2.45703	3.26944	2.71527	3.48452	6.0191	5.5167	3.35319	3.60533	5.60727	5.96336	7.95149	7.55761	10.0267	9.05858	3.03997	6.19314	1.36757	5.22481	6.60546	0.541733	1.27659	4.73948	4.95175	6.52849	6.25729	1.40207	2.59123	2.11542	3.60301	2.88883	6.25362	6.74796	1.96946	2.17163	1.765	2.70343	3.6288	3.68606
RCV	RCV	5.14869	3.41397	5.79134	4.2046	2.21774	2.43983	2.85981	5.0098	3.96054	4.99644	3.87685	3.43532	3.15434	3.57795	6.19384	5.60425	3.19632	3.42676	6.57317	6.63613	8.25336	7.76473	9.99792	9.45022	2.36832	6.946	1.36509	6.08601	7.40182	0.84631	1.11363	5.65021	5.46166	6.26354	6.38575	1.25115	2.1717	2.33107	3.77537	3.08512	8.02646	7.86048	3.11611	2.03389	2.13209	2.92836	4.35324	3.46332
RCV	RCV	4.77915	3.96001	5.37297	4.42705	2.77636	2.79106	3.07795	4.98339	3.62709	6.10473	3.21458	3.10404	3.26447	3.53915	6.23725	6.19733	3.26259	3.10404	5.68462	6.25478	8.00815	8.85537	10.5801	10.5765	2.24935	6.31811	2.48033	4.84784	6.26823	1.16825	0.17098	4.4977	5.24171	6.5708	6.78459	0.978457	2.47666	3.27219	2.78424	3.64575	5.36653	6.70674	2.1526	1.39678	1.813	2.62256	3.60412	3.52331
RCV	RCV	4.76959	4.02174	5.37435	4.2445	2.61736	2.48626	3.25805	4.95853	3.85233	5.91599	3.20155	3.33143	3.30183	3.74509	6.30816	6.07393	3.06325	3.43604	6.12355	6.50027	8.23927	8.4652	10.1737	9.91029	1.938	6.91685	1.92924	5.51795	6.54334	1.28598	0.503365	5.07215	5.63708	6.61128	6.88635	0.977108	2.73225	2.89143	2.91524	3.52389	6.59006	7.48718	2.37718	1.99484	2.59083	2.37832	3.27251	4.0765
RCV	RCV	5.24262	4.65471	5.48101	4.68454	2.36859	3.21042	3.47776	5.39539	3.86403	6.56707	3.54228	3.90191	4.13569	3.28242	6.42757	7.73182	4.23249	3.84332	6.56211	6.94754	8.30703	8.70701	11.2602	10.7146	2.16608	6.77582	2.06748	5.77528	7.42349	1.64604	1.88486	5.14945	5.6718	6.99252	6.94152	1.20128	3.00073	3.23759	2.85082	3.93557	6.94908	7.80752	2.32038	2.26057	2.15716	2.9895	3.7553	4.01753
RCV	RCV	4.69865	5.08139	4.25897	4.14722	3.24294	2.63923	2.36201	4.97416	3.61441	6.27363	3.6007	3.84988	4.51565	3.5263	5.03224	6.36884	4.1163	3.73341	6.11161	6.77829	8.28893	9.01411	10.975	10.314	2.14208	6.66947	2.40641	5.6609	7.28539	1.19705	0.20207	5.49057	6.31627	6.44883	6.72522	1.58301	2.40535	2.7374	2.4568	4.48325	6.69811	8.10824	2.46264	1.99388	2.07337	3.32284	3.99192	3.44188
RCV	RCV	4.08433	5.94045	5.18583	3.70481	3.52782	3.82154	2.74304	4.18845	5.43373	5.97618	3.48506	4.30996	4.91259	4.97057	6.61453	6.89913	4.4621	4.65171	5.90557	6.55532	7.70932	8.85341	11.8918	11.4124	2.60357	6.68046	2.5393	5.00518	6.74343	1.94985	1.77065	5.83167	6.4196	8.29542	8.11743	1.15839	2.671	2.68625	2.92197	3.78609	6.31848	7.36204	1.87414	2.74852	2.87563	2.51565	3.62358	3.40905
RCV	RCV	5.99618	3.68802	6.18783	5.04344	2.88204	2.54519	2.87944	5.75898	4.50779	4.97739	3.96202	3.76331	3.50748	4.15744	6.41228	5.5775	3.86383	3.77414	7.30649	6.84917	9.49808	8.82683	11.6908	10.9222	2.93969	7.11589	1.70013	5.81166	7.49574	0.492123	1.19046	6.04986	5.42955	6.80338	6.6215	1.96177	2.46728	2.23656	4.06555	2.832	8.52986	7.41442	3.0214	2.28634	1.91892	2.69452	5.02309	3.06304
RCV	RCV	4.80064	4.33032	4.94853	4.09127	3.07018	2.28364	2.55393	4.70425	3.82462	5.26792	3.21524	2.39978	4.03859	3.78048	5.39233	5.31441	3.96322	3.94943	6.39538	6.02801	8.07614	8.33738	10.0862	10.3672	1.92047	6.96324	2.61802	5.20201	6.56226	0.916324	0.111606	5.76469	5.41744	6.62329	6.96225	0.754072	2.66412	2.90375	3.0882	3.28708	7.42716	6.74911	2.71799	2.1783	2.46353	1.98478	3.69633	4.6444
RCV	RCV	5.35571	4.13588	5.29724	4.75958	2.62162	2.93571	2.82581	5.46059	3.00654	6.6113	3.16745	2.62323	3.47158	3.08295	6.15298	6.53679	3.47291	2.75375	6.44298	6.68691	8.68573	8.55605	10.787	11.2094	2.01284	7.04054	3.15932	5.76683	7.05712	1.20753	0.116624	5.06419	5.38763	6.76445	7.25011	1.56316	2.55718	3.12395	3.07549	4.37063	6.79825	7.3736	2.5646	1.7725	2.9413	1.76565	3.65779	4.42777
RCV	RCV	6.12648	4.15229	5.69018	5.47861	3.04425	3.05724	2.70015	6.44804	4.44742	5.91165	2.85177	2.67655	3.62332	4.30559	6.39348	6.0779	3.77891	3.99668	7.10059	7.65858	8.83384	9.05892	12.3319	12.3179	2.80811	7.51537	2.66818	5.66512	7.37992	1.09882	0.383845	5.39214	6.21483	7.80617	8.14226	1.51897	2.24708	3.29913	3.50698	3.87088	7.25954	8.75226	1.87972	2.5989	3.29847	2.09602	3.71274	4.93516
RCV	RCV	5.81317	4.50218	4.89058	5.1526	2.74266	2.91521	2.66755	6.32903	3.96198	6.26428	3.85044	4.52543	3.77064	3.89483	5.89612	6.38006	4.14225	3.75541	6.79512	7.80119	9.13442	10.1261	11.6735	11.4007	2.25734	7.6197	2.41621	5.95155	7.36871	1.43105	0.493933	5.16999	6.51081	6.55061	6.59206	1.35533	2.11011	2.7186	2.82493	4.36267	7.12164	9.53285	2.89709	1.50261	2.61362	3.27739	4.78723	2.85788
RCV	RCV	5.91429	4.50584	6.59805	5.15903	3.22116	3.4531	3.01164	5.71223	6.15302	4.57151	3.76459	3.94617	4.19722	5.04925	7.04128	6.49382	4.04269	5.12438	7.50398	6.90169	11.2018	8.42992	13.3107	11.9449	3.76366	6.27061	1.10172	5.43791	7.51764	0.925818	2.6331	6.32051	5.61211	7.43618	7.63245	2.82425	4.18473	2.52239	4.23831	2.25482	8.34117	7.03687	2.67322	2.77016	2.16598	2.42652	3.78005	4.38075
RCV	RCV	5.04433	5.10601	5.76965	4.42129	3.15514	2.87161	3.50563	5.08415	4.23946	6.72206	4.48612	3.75066	4.59995	3.83481	6.46956	7.29492	4.64454	3.81162	6.84173	6.99961	8.70189	8.59993	11.5245	10.9401	2.25235	7.30879	2.1937	6.14727	7.72068	1.18999	1.04974	6.1073	6.27024	8.06733	8.26035	2.09128	1.83217	2.4996	3.17835	4.06381	7.64973	7.93664	2.4985	2.7275	2.03949	3.38346	5.38139	2.99845
RCV	RCV	5.17957	5.07623	5.74863	4.51335	3.04676	2.96557	3.42018	5.18659	4.12079	6.71875	4.42288	3.62654	4.54816	3.70026	6.5064	7.29433	4.51155	3.70452	6.89079	7.07261	8.65612	8.66391	11.5644	11.0601	2.26873	7.34147	2.28226	6.1882	7.77645	1.28678	1.01373	6.08175	6.19053	8.17341	8.25816	2.21847	1.68005	2.51515	3.21515	4.12525	7.74849	8.00111	2.51785	2.723	2.11917	3.29257	5.23296	3.09986
RCV	RCV	4.27892	4.0106	6.9206	3.81646	3.37074	2.69429	3.68476	4.30049	5.48746	5.49884	3.8265	4.17452	3.84037	4.78312	7.12027	6.53571	3.11354	4.29658	6.23373	6.35206	8.05455	8.08257	10.3653	10.8689	2.39678	7.17661	1.8529	5.80952	7.12731	0.427215	1.61616	5.97741	6.08847	8.02819	7.95262	1.53591	2.47472	2.34929	3.99486	2.80558	6.86378	7.05985	3.16413	1.7688	1.87098	3.20465	4.07381	2.96663
RCV	RCV	5.28047	4.22366	5.22901	4.59431	3.26036	2.01879	2.94521	5.42157	3.74637	5.95888	4.54761	4.81542	4.03115	3.76218	5.45574	5.94348	3.0411	2.61349	6.36427	7.09932	9.32512	9.47368	10.931	10.4543	2.42363	7.07699	2.01778	5.76639	7.48879	0.45095	0.0461757	5.60765	6.1841	5.30095	5.47116	1.27202	3.30135	3.27094	2.98725	3.85028	7.00974	8.29303	2.57163	1.92736	1.50682	3.82122	4.05255	2.65384
RCV	RCV	4.63389	2.90452	6.60398	4.05089	3.23761	2.74925	2.32535	4.73555	4.70178	5.01531	3.86483	4.38737	2.94768	4.55928	6.56151	5.18246	2.73656	4.00379	6.12146	6.48229	9.31492	8.44059	11.0142	10.8165	3.70241	7.96204	2.4054	5.99088	7.45852	0.0681052	0.379033	5.62989	5.99388	5.91938	6.14166	1.56946	3.24334	2.66172	4.70503	3.2612	6.83958	7.51339	2.24779	2.35077	1.68086	3.37191	4.10035	3.16299
RCV	RCV	4.30433	4.91903	5.23918	3.91412	3.02654	3.35309	2.85768	4.54239	4.47375	6.24628	3.10784	3.87502	3.82568	4.25471	6.59801	6.54977	3.51516	3.85182	5.84754	6.60706	7.61936	8.09348	11.2633	10.4206	2.56837	6.73008	2.13759	5.38571	6.83514	1.69048	0.711811	5.24397	6.17713	7.79114	7.93608	1.4112	2.30027	2.35722	2.9154	4.0325	6.13563	7.62824	2.3487	1.96156	1.95318	3.40537	3.44628	3.44517
RCV	RCV	3.89878	5.49324	5.68253	3.58289	3.81438	2.3767	4.07918	4.17756	5.43067	6.5442	3.92363	4.29028	5.01028	5.17134	6.46273	7.1162	4.49791	4.79155	5.69824	7.10355	8.52089	9.04316	10.5429	10.4865	1.76093	6.76022	1.67137	5.61956	6.95766	1.44161	1.42866	5.83682	7.234	7.88498	8.3748	1.0187	2.87679	3.39447	2.5217	3.69171	5.96827	8.28203	2.44901	1.97652	2.43481	3.71076	4.27485	3.92363
RCV	RCV	3.65896	5.64113	4.83106	3.29621	4.37485	2.32481	2.73432	3.78143	5.78695	5.03576	3.21525	4.06997	5.22247	5.60929	5.34352	5.35707	4.52442	5.0361	5.55439	6.30938	7.9031	7.97047	10.5238	10.7016	1.97703	6.29722	2.18921	4.56552	5.83919	0.842928	0.918436	6.28774	6.89877	7.53757	7.66447	1.37702	3.12177	2.66788	2.63593	2.98521	6.05915	7.23318	2.19743	2.29283	2.14026	3.2206	3.44791	3.98695
RCV	RCV	4.50441	5.27424	5.03347	4.13845	3.48924	2.4523	3.52873	4.80781	4.0762	6.9258	2.98103	3.54018	4.60095	3.90587	5.9291	7.18384	4.07867	3.68546	5.66448	7.12936	7.60454	8.60517	10.6984	10.8975	1.61216	7.12618	2.45068	5.67452	6.88505	1.33308	0.702193	5.29461	6.67552	7.89766	8.28631	1.3165	2.31267	2.98649	2.22425	4.32754	5.64778	8.25346	1.99083	1.94014	2.36479	3.37886	3.28661	4.07735
RCV	RCV	3.63746	4.28982	6.42791	3.30056	3.54354	2.71465	3.46685	3.7373	5.19298	5.81892	3.60226	4.20171	4.00274	4.66423	6.73579	6.50706	3.12962	3.2458	5.35008	6.38785	7.39757	8.6827	10.4663	9.999	2.88768	6.512	1.56192	5.48136	6.82253	0.440882	1.11615	5.62436	6.38536	7.49631	7.31094	1.82105	2.97498	3.42756	3.53366	3.2712	5.74209	7.22445	2.25526	2.03336	1.74568	3.65971	3.48192	3.81719
RCV	RCV	4.27463	5.03695	6.31291	3.80672	4.35712	2.56282	3.18756	4.25973	6.59886	4.71147	3.04218	4.0544	4.88339	6.07554	6.5757	5.65529	4.30607	5.29151	6.41476	6.34453	8.54139	8.04457	11.3307	11.5217	2.8135	6.67171	1.7415	5.18204	7.07575	0.809758	1.71628	6.75592	6.68928	8.62115	8.28134	1.93763	3.45917	2.49444	3.76473	2.34874	7.1077	6.98723	2.2757	2.88819	1.88199	3.19444	3.328	4.37554
RCV	RCV	3.87096	3.62663	5.96436	3.34223	2.77139	1.85513	3.65445	3.94514	4.04179	5.73301	3.41071	4.26375	3.47257	3.89837	6.20723	5.96412	3.42312	3.35564	5.80355	6.25594	7.38897	7.71536	8.7756	9.24853	1.73639	7.45735	1.84625	6.06265	7.26808	0.661509	0.670767	5.53766	5.92654	7.02289	6.77456	2.03181	2.25731	2.09067	3.33371	3.30262	6.69771	7.38465	2.28422	2.48778	1.75548	3.50949	3.99863	3.02236
RCV	RCV	5.33814	4.97725	5.00506	4.50383	2.70727	2.75591	2.95897	5.31243	3.77686	6.15738	3.97363	4.64218	4.69281	3.56722	5.81503	6.53003	4.74588	3.28885	6.89739	7.03482	9.01672	9.35455	11.1588	10.5336	2.21663	7.31526	2.16265	6.03597	7.81622	1.72934	0.918277	5.95092	5.97712	6.4803	6.20923	1.88613	3.06445	2.70263	2.94148	3.9977	8.09007	8.22204	2.65749	2.6145	2.11895	3.24539	4.19438	3.37798
RCV	RCV	4.3234	4.69457	5.23756	3.69445	3.19012	2.52556	2.77157	4.5305	4.32779	6.08012	4.14319	4.74096	4.13369	4.18483	5.88134	6.24138	3.34989	3.69728	6.31829	7.09526	7.57879	8.71181	9.75675	10.7914	1.59963	7.7612	2.74222	6.25836	6.95068	0.878792	0.339493	6.05326	6.82958	6.95818	6.9752	1.02802	2.13749	2.34697	3.20368	4.14964	7.37125	8.67987	3.06495	2.07792	2.19065	3.86315	4.09438	2.96239
RCV	RCV	4.6371	4.55506	6.17937	4.13332	3.87801	2.86356	2.82667	4.75323	5.84392	5.15933	3.49174	3.82989	4.32639	5.54203	6.43948	5.77327	3.68274	4.76748	6.25892	6.96127	8.50813	8.62501	11.3794	11.9761	2.83362	7.6242	2.55631	5.44674	6.97089	0.472923	1.39752	6.16901	6.73272	7.70915	7.82217	1.60686	2.94322	3.10839	3.85323	3.06995	6.80283	7.94918	2.75428	1.99639	2.18882	3.36256	3.79161	4.32949
RCV	RCV	6.02098	3.92278	6.01507	4.86118	2.25561	2.64399	3.12397	5.75163	4.15045	5.34283	3.05708	3.44673	3.66429	3.78905	6.47031	6.13369	3.50319	3.75083	7.47286	7.16501	8.56791	8.4101	10.8015	10.4683	2.12046	7.47912	1.60061	6.41529	7.66577	1.02785	1.53404	6.20479	5.63122	7.46807	7.23667	1.75843	3.17837	2.1482	3.90886	3.21854	9.2294	8.33909	3.03023	2.7192	2.16411	3.02921	3.25617	4.84054
RCV	RCV	6.61811	4.79492	4.91302	5.68648	2.4774	3.27871	2.58525	7.08388	4.26768	6.12348	3.92306	4.0733	3.90087	4.08308	6.18808	6.55394	3.00139	4.01209	7.35566	8.63661	9.21653	9.82401	12.2762	11.8719	2.23631	7.4	1.98213	6.20719	7.44528	1.74833	1.1545	5.43992	6.79321	6.59961	7.23641	1.04576	2.36338	3.01134	2.9537	4.37991	8.05539	10.7277	2.54634	2.24402	3.25195	3.12995	3.40949	3.99189
RCV	RCV	6.06905	3.63912	5.3538	5.31356	2.07388	3.08708	2.71249	6.57951	4.17669	5.57261	3.08038	4.19972	3.22564	4.17379	6.09802	6.17367	3.48003	3.94168	6.81794	7.88296	8.75832	8.95005	11.6877	10.9331	2.91143	7.16563	1.71262	5.87649	7.78144	1.32628	1.73518	4.7859	6.14266	6.52918	6.67713	2.20012	2.27607	2.34782	3.24265	3.75458	7.2048	9.7034	2.22814	2.07376	2.47383	3.31978	3.63891	3.50254
RCV	RCV	7.00631	3.20561	6.36446	5.6632	1.7648	2.81517	3.15551	6.57713	4.08093	4.90291	4.06073	3.23353	3.30969	3.52832	6.80894	5.99976	3.72947	3.96748	7.83302	7.41932	8.96337	9.49041	10.7733	11.2278	1.90146	7.45776	1.69146	6.31027	7.57393	1.55315	1.77127	5.81075	4.99231	7.09862	6.68689	2.15936	1.74428	2.11267	4.19657	2.76103	9.53851	8.14009	3.77313	1.73673	1.36183	3.33784	4.69184	3.26986
RCV	RCV	6.05645	3.78917	4.87519	5.23906	2.65327	2.63698	2.20475	6.64313	4.42308	5.08057	4.09221	4.28882	3.6282	4.20937	5.28918	5.38034	3.70565	3.86838	7.0462	7.58373	10.1795	8.89793	11.1214	11.5542	2.32792	7.17516	2.44578	5.57868	7.31814	1.08096	0.687903	5.21465	6.29549	5.199	5.82877	1.52854	2.70285	2.76852	3.21784	3.55356	7.75637	9.57244	2.90287	1.66676	2.68322	2.95093	4.3855	3.13325
RCV	RCV	6.14325	6.01935	4.09189	4.85557	2.99351	3.10949	1.88885	6.25544	5.46449	4.83141	5.10938	4.49025	5.30932	5.05562	5.36204	5.4919	4.61269	4.58327	7.58682	8.40539	9.44389	8.95893	11.4182	11.5848	1.59188	6.47585	1.87726	5.58023	6.46755	1.97314	1.26507	6.75448	7.28137	6.32456	6.87899	1.34931	2.18504	2.90106	2.79869	3.61715	9.59709	10.8087	4.01337	1.96859	2.46458	4.26531	4.96845	3.70201
RCV	RCV	6.15453	4.72477	4.66959	5.36474	2.78397	2.80363	2.60121	6.62653	4.33998	5.77485	3.08506	3.36601	4.47877	3.89996	5.42195	6.40986	4.24893	3.87812	7.02904	8.0486	8.3852	9.75774	11.5063	11.7995	1.96982	6.76318	2.27561	5.71063	7.29618	1.64108	1.11797	5.35914	6.58037	7.08155	7.5415	1.56437	2.24145	3.05991	2.70947	3.98427	7.55812	9.88988	2.33382	2.23593	2.86624	3.10944	3.30373	4.61731
RCV	RCV	6.28635	4.6215	4.78871	5.42755	2.93824	2.53788	2.64853	6.54917	4.24868	5.55496	3.66688	3.36117	4.42718	4.08812	5.33724	5.87106	4.18097	3.84531	7.15918	7.77423	8.54848	9.18907	11.5525	11.8783	2.06621	7.2668	2.49917	5.54499	7.21183	1.35389	0.898204	5.55785	6.25069	6.70177	7.29709	1.61935	2.10427	2.69235	2.82338	3.68565	7.84057	9.23139	2.27486	2.4262	3.12004	2.41838	3.8926	3.80952
RCV	RCV	6.87018	4.70862	4.58527	5.65871	2.84365	2.77233	2.03905	7.05488	5.13941	4.40432	4.00053	4.31507	4.41419	4.59739	5.12059	5.29696	3.89855	4.2207	7.75971	8.00371	9.15793	9.53214	11.7946	11.8217	1.98216	6.20417	1.7223	5.23618	6.48394	1.14332	1.4926	6.00111	6.35681	6.32491	6.23284	1.00223	2.2103	2.37529	3.13241	3.01954	9.20564	9.87341	3.54341	1.76125	2.78494	2.89247	4.03888	3.29434
RCV	RCV	5.95194	3.47671	6.11755	4.62709	2.92655	2.60996	1.92215	5.65074	5.29386	3.81488	3.92126	4.14206	3.32168	4.67871	6.2937	4.64122	2.9675	3.98049	7.71647	6.87794	9.67456	8.54853	11.0747	10.6185	2.74435	7.15428	1.43233	6.25503	7.11997	0.346736	1.22141	6.75472	5.94657	5.97708	5.73196	1.63163	3.57165	2.44894	4.7969	2.47853	9.91962	8.33314	2.829	3.29494	2.4529	2.6911	3.92312	4.3385
RCV	RCV	5.37389	4.82544	5.60889	4.80274	3.0717	3.29984	2.95381	5.46063	4.20367	6.39909	3.17048	3.20732	4.35293	3.91776	6.43586	6.79594	4.06026	3.54771	6.72616	6.94569	8.48096	9.5056	12.1124	11.9602	2.78904	7.56583	3.03248	5.59536	7.76083	1.50836	0.821397	5.6093	5.89641	7.73316	7.80632	1.62784	2.87015	3.12247	3.25585	4.04835	7.11993	7.61611	2.43161	2.26805	2.6877	2.33947	3.29862	4.61698
RCV	RCV	4.50479	4.80981	5.27555	3.81745	3.30314	3.08143	2.16196	4.38121	4.94677	4.86191	3.94649	3.50396	4.35089	4.55188	5.9252	5.39126	3.70741	4.24229	6.46117	6.25615	7.59523	7.96223	10.6824	11.0959	2.37649	6.99682	2.63916	5.19297	6.56154	1.12747	0.937011	6.24075	5.88823	7.24079	7.22756	2.20398	2.2077	2.31178	3.61082	3.18059	7.60514	7.10701	2.96274	2.29459	2.5793	2.33867	3.90307	3.36141
RCV	RCV	5.22094	4.25979	5.94724	4.62381	3.10205	2.85192	3.08567	5.34833	4.47728	5.97881	3.24618	3.21823	3.96758	3.99754	6.30403	6.58824	3.771	3.92978	6.73777	6.88098	8.84784	8.17925	12.2441	10.6078	3.4124	6.65964	1.6583	5.76879	8.06298	0.65069	0.977088	5.72403	6.04334	7.61077	8.16603	1.59701	2.67326	2.46968	3.54827	3.62711	7.32628	7.78467	2.41812	2.4363	2.23703	2.91461	3.95171	4.26406
RCV	RCV	4.73751	4.84331	6.21451	4.17252	3.72777	2.41126	3.60004	4.96569	5.6517	5.93873	3.90718	4.20773	4.35594	5.31402	6.78626	6.39071	3.53229	4.92942	6.91703	7.31599	8.57924	9.22878	10.8865	11.1823	1.85641	7.395	1.82638	6.18542	6.99469	0.857936	0.905589	6.52859	7.206	8.12562	8.30396	1.04385	2.67463	2.92814	3.55097	3.44267	7.76267	8.70359	3.22604	2.21145	2.63424	3.46907	4.00226	4.26808
RCV	RCV	4.70287	4.77065	6.40999	4.19999	2.92562	2.96913	4.09034	4.88287	4.92924	6.67934	3.48363	4.3888	4.23423	4.64295	7.33587	7.42188	3.89433	4.3016	6.65095	7.15729	8.20174	8.26245	11.1751	10.81	2.25605	7.59134	1.83379	6.29161	7.79899	1.6313	1.6939	5.8742	6.54864	8.67377	8.72591	1.47366	2.50133	2.21939	3.34684	3.75509	7.27343	8.28631	2.92545	2.19517	2.05787	3.77577	3.74299	3.6742
RCV	RCV	5.18394	4.56458	6.08733	4.53559	3.40661	2.50674	3.40634	5.29585	4.92883	5.95301	3.63857	3.83474	4.27907	4.42827	6.39069	6.61349	3.34023	4.0647	6.82575	7.26489	8.9005	9.27629	10.7099	11.5475	1.70523	7.36214	2.25853	6.02542	6.65903	0.423216	1.09409	6.16124	6.5909	7.58091	7.66247	1.6347	2.94537	3.14719	3.50599	3.52064	7.61132	8.40915	2.58035	2.54722	2.27634	3.38023	3.71849	4.51803
RCV	RCV	5.44723	6.04002	6.32904	4.74833	3.8133	3.0134	3.95537	5.39139	5.56585	6.67641	4.4053	4.79214	5.77436	4.7816	6.69844	7.95145	4.97605	4.37551	7.67408	7.51986	9.58429	9.11124	12.493	12.2131	2.14734	7.41007	2.07671	6.27422	7.87658	0.86252	2.01346	7.14873	6.95216	9.18037	8.98235	2.08363	2.73922	2.3836	3.46505	3.70899	8.6981	8.38463	3.31853	2.72353	2.15019	3.67142	4.76699	3.46058
RCV	RCV	6.4427	5.6616	6.96778	5.64119	3.77605	3.39437	3.88777	6.41306	4.89128	7.67999	4.70758	4.51668	5.21487	4.52134	7.49917	8.2458	4.11522	4.3797	8.17938	8.35197	10.2329	11.2187	14.1316	13.3531	3.09992	8.81619	2.77709	7.05049	9.07652	0.874944	1.1742	7.10941	7.13876	9.04941	8.76057	2.43942	2.8795	3.54343	3.99399	4.67742	9.03581	9.21011	3.82292	2.16768	2.77494	3.33744	4.68706	4.25603
RCV	RCV	6.08789	5.03784	6.09586	5.13844	3.21171	2.94021	3.2454	6.12895	5.16089	6.04791	4.58365	4.72068	4.71387	4.93114	6.63743	6.66401	4.25969	4.45348	7.98353	7.87775	10.8758	9.23415	12.5272	11.9398	2.60924	8.07372	2.08079	6.56678	8.32409	1.1792	1.53458	6.83237	6.85063	7.21844	7.58946	2.85951	3.34258	2.69303	3.80811	3.74124	9.37545	9.31252	2.91664	3.14527	2.2729	3.75064	4.77237	4.00777
RCV	RCV	5.61599	4.39005	6.77202	4.77291	3.58897	2.77444	3.123	5.69067	5.67347	5.63704	4.81517	5.07119	4.1017	5.67384	7.0896	6.03859	3.54331	4.74439	7.76286	7.6062	11.1098	9.03443	12.7758	11.3321	3.46584	8.13195	1.61181	6.7197	8.13481	0.495807	1.5342	6.97656	7.04505	6.99502	7.23089	3.00191	3.47264	2.92173	4.4775	3.41852	9.08331	9.02275	3.10186	2.94111	2.26013	3.75388	5.06398	3.68341
RCV	RCV	5.92322	4.83884	6.07699	5.2751	3.53222	2.94776	3.24143	6.26645	4.96446	6.5839	3.96704	4.90865	4.30546	4.78119	6.74582	6.81284	3.68384	3.76673	7.48278	7.91253	9.48971	10.2293	12.4483	12.7419	2.39795	8.24409	2.84309	6.32416	7.74053	1.04232	0.547858	6.21104	7.04647	8.3841	7.68078	1.76455	2.06595	2.81961	3.5741	4.17397	8.00512	9.28346	3.2058	1.99079	2.50631	3.51525	4.49518	3.26751
RCV	RCV	5.16304	4.45132	5.31348	4.63229	2.71373	2.58146	3.46582	5.60048	3.9088	6.68333	3.64023	3.84852	3.64746	3.76216	6.34088	6.90243	3.43057	3.51991	6.45863	7.39694	8.57573	8.93063	10.5425	10.8556	1.55631	7.56175	2.26692	6.15165	7.01268	1.38408	0.623457	5.16816	6.46665	6.9733	7.44488	2.17082	2.31016	2.9825	2.72648	4.24323	6.78212	8.91547	2.48399	1.96776	2.46646	3.36953	4.02119	3.73735
RCV	RCV	5.04568	2.94745	7.29955	4.44316	2.55384	2.8371	3.63245	5.03137	4.06761	6.15035	2.7085	3.5253	2.81452	3.55427	7.43754	6.815	2.40692	3.01836	6.59782	6.52078	8.53042	8.19615	10.8389	10.459	3.00878	7.6925	1.93769	6.4227	7.51624	0.198183	1.03702	5.49568	5.42293	7.78568	7.40509	1.5353	3.31243	2.55134	4.45202	3.39559	7.26853	7.13347	2.61923	2.25478	1.8375	2.94458	2.9461	4.58
RCV	RCV	5.14562	5.16268	4.17271	4.52419	2.45119	3.19862	2.55815	5.80989	4.84156	5.69898	3.49137	4.15848	3.97121	4.5866	5.79281	6.55643	3.43576	3.83732	6.29071	8.07602	8.41453	9.35371	10.5187	11.0246	1.25848	6.67741	1.97911	5.61648	6.22662	2.01601	1.87807	5.04802	7.08537	6.19687	7.27673	0.862492	2.87526	3.12866	2.26375	4.05318	6.8225	10.3351	2.4395	1.96101	1.96811	4.69507	3.07284	4.59525
RCV	RCV	4.63448	4.64866	5.44634	4.05647	3.05011	2.72192	3.06393	4.70689	4.24475	6.00798	2.93314	3.49274	4.15017	3.84946	6.02875	6.5474	3.4676	3.45315	6.51324	6.43079	7.72148	8.15509	10.7472	10.2208	2.1389	6.80657	2.02223	5.69849	6.87121	0.843326	0.963865	5.8391	5.94855	7.65508	7.51142	1.45769	2.99335	2.55145	3.1799	3.66828	7.33856	7.37883	2.45569	2.57428	2.33803	2.72021	2.85338	4.51671
RCV	RCV	4.59309	4.81362	5.26095	3.95822	2.97456	2.86888	2.83858	4.59616	4.26148	5.81983	3.02296	3.61993	4.32383	3.77514	5.83533	6.53815	3.53301	3.41602	6.45615	6.48291	7.70093	8.10315	10.7607	10.1203	2.23008	6.66321	1.94655	5.64713	6.88091	0.841531	1.22314	5.90931	5.92881	7.55256	7.22743	1.62537	2.9626	2.59641	3.15973	3.67253	7.43045	7.47034	2.40557	2.69812	2.33435	2.80228	2.88701	4.46467
RCV	RCV	5.26399	5.09415	5.10909	4.79319	2.81729	3.19677	3.27661	5.78381	3.9667	7.24411	3.77552	3.89883	4.13288	3.70504	6.46317	7.65496	3.81197	3.27718	6.73739	7.50397	8.83785	9.0715	11.4953	11.6097	1.72934	7.77873	2.81531	6.3244	7.49341	1.83906	0.932066	5.27768	6.67315	7.40717	7.88036	1.62136	2.35543	3.24205	2.6252	4.79221	6.92071	9.01776	2.88843	1.68265	3.02825	2.92263	4.06541	3.90935
RCV	RCV	5.20663	4.24632	5.97409	4.4758	2.69517	2.87615	3.21452	5.22832	3.85022	6.41279	4.08686	3.95292	3.76739	3.51651	6.52478	6.90088	3.04143	3.80391	6.84603	6.97231	8.48356	9.26088	10.6575	11.1413	1.99377	8.01609	2.69661	6.37666	7.31832	0.78504	0.949617	5.85936	5.96702	6.92535	7.08775	1.10582	2.66237	2.71569	3.59795	4.02863	7.84044	8.04843	2.77788	2.41907	2.64126	2.69663	3.98387	3.56622
RCV	RCV	5.62132	4.18472	5.51469	4.71132	2.42134	2.50679	3.2011	5.71289	4.68477	5.17264	4.11691	4.41407	3.76811	4.36001	6.40643	5.82713	3.30546	3.90256	7.23523	7.14911	8.54661	8.81465	10.4575	10.2329	1.65566	6.79216	1.27867	5.94612	6.871	1.64399	1.37115	5.90053	5.99851	6.52671	6.55973	1.0991	2.48464	2.23783	3.37254	3.06739	8.55882	8.60962	2.98133	2.43817	2.55873	2.89239	3.85677	3.11275
RCV	RCV	5.81241	5.12736	5.17233	5.08514	2.48479	3.09069	3.43548	6.02137	3.44187	7.22809	4.36438	4.09112	4.06735	3.16413	6.60075	7.65885	3.4184	3.99213	7.31577	7.45177	9.19842	9.90664	11.1148	11.8809	1.15144	8.13341	3.13881	6.57176	7.23497	1.86474	0.90867	5.68731	6.11923	7.06367	7.3046	0.891066	2.41826	2.8486	2.7934	4.64906	8.07723	8.67399	3.47994	1.68439	2.6539	2.89145	4.2077	3.29837
RCV	RCV	5.28761	4.47609	5.72368	4.6395	2.59046	2.60574	3.75338	5.41694	4.0709	6.37836	3.95219	4.14882	3.94716	3.80051	6.68641	6.82092	3.65485	3.75213	6.62508	7.24062	8.05287	9.12047	10.5407	10.719	1.64444	7.26614	1.93018	6.05547	7.15588	1.65618	0.988248	5.46941	6.05387	7.49768	7.48656	1.64886	1.93888	2.34742	2.98406	3.75066	7.2668	8.35589	2.76387	2.02267	2.39333	3.11149	4.10903	2.84298
RCV	RCV	3.23101	3.23056	5.03175	2.88507	2.04478	3.30912	2.02376	3.13007	3.42163	4.58255	2.30424	2.25576	2.95038	2.55003	5.3984	5.67969	2.69782	2.50386	4.84241	4.11807	6.01867	5.39596	8.49011	8.99936	2.2534	5.67484	2.75239	4.05405	5.51072	0.66378	1.35395	4.32285	3.64656	6.52491	6.33567	1.75031	2.09753	1.55322	3.37394	2.80822	5.34476	4.15379	1.80315	2.04108	1.47832	1.50798	2.64029	2.84871
RCV	RCV	4.26122	3.18219	4.04555	3.64356	2.40309	1.44723	2.32976	4.03182	2.61928	4.21935	2.07009	2.47393	3.09522	2.5957	4.16089	4.24368	2.74235	2.66227	4.79655	5.11421	6.03531	6.57886	8.05558	8.11946	1.69007	5.07176	1.68653	3.94936	5.29153	0.333384	0.0545938	4.26174	4.0005	5.46629	5.17216	0.795101	1.93203	1.52838	2.25908	2.46858	5.35095	5.33926	1.42783	1.9387	1.05568	2.30341	2.30341	2.71748
RCV	RCV	3.69544	3.37872	4.2843	3.21159	1.89555	2.45213	2.31201	3.55366	2.71938	4.64963	2.5666	2.44523	2.87369	2.3967	5.00654	5.07971	2.69107	2.3172	4.84694	4.61757	6.04192	5.86136	8.11896	8.08694	1.6761	5.31267	2.04598	4.13964	5.20231	1.09233	0.708877	4.16992	3.74887	5.65433	5.64412	0.817823	1.87178	1.54171	2.51549	2.77312	5.45946	4.84034	2.01544	1.67138	1.3302	1.93964	2.73385	2.50694
RCV	RCV	3.42583	3.33919	4.93991	2.98721	1.94591	2.83135	2.44184	3.29175	3.1516	4.80346	2.93344	2.75677	2.59101	2.64606	5.79924	5.46678	2.17586	2.42357	4.95001	4.56293	6.18644	5.96361	8.09647	8.44581	1.79963	5.7503	2.23292	4.4375	5.03156	1.03672	0.963934	4.44703	3.91548	5.92586	5.91037	1.52743	2.08414	1.73083	3.03446	2.8023	5.62463	4.8325	2.31168	1.66737	1.28647	2.13479	2.88059	2.49149
RCV	RCV	3.9981	3.82943	3.57445	3.56886	1.95062	2.60431	2.05406	4.22757	3.38864	4.44019	2.48386	3.68209	3.15868	3.90153	4.43466	4.93962	3.25068	3.9194	4.86376	5.53419	6.55921	6.73206	8.82402	8.29115	1.67155	5.39194	1.67518	4.03025	5.03362	1.14037	2.03673	3.85269	4.64158	5.40209	5.34152	1.38078	1.83274	1.53553	1.9664	2.92706	5.10674	6.49595	1.48738	1.82935	1.50847	2.70967	3.07334	2.016
RCV	RCV	3.72388	2.65932	4.46462	3.1661	1.84952	2.35548	1.85188	3.50799	2.4826	4.22835	2.52688	2.33849	2.47216	2.19617	4.68002	4.56331	2.32096	2.09913	4.82995	4.35729	6.22999	5.93933	7.88041	7.99498	2.00716	5.49651	2.2618	4.17204	5.32082	0.365267	0.495028	4.13986	3.47136	5.06043	4.87266	1.45835	1.93062	1.61709	3.03439	2.6928	5.60836	4.50484	1.96269	1.723	0.996919	1.96148	2.89142	2.4779
RCV	RCV	3.04486	3.24961	3.82608	2.62332	2.57784	1.77916	1.73912	3.10689	3.50795	3.71188	2.26241	2.99069	3.22881	3.19541	3.84713	4.09382	2.77766	2.70002	4.37276	4.75241	5.43633	5.83325	7.59047	7.31628	1.86681	4.66785	1.35609	3.93506	4.93578	0.0359757	0.609445	4.39093	4.68052	5.17166	4.99772	1.28172	2.01102	1.72488	2.47512	2.44483	5.04458	5.62773	1.73736	1.79285	1.33192	2.60279	2.43546	2.82002
RCV	RCV	3.6569	3.22276	4.67615	3.21352	2.33126	1.87313	2.73681	3.54945	3.37272	4.2941	2.96965	2.87096	3.11919	3.03205	4.83831	4.86329	2.95633	3.03689	4.88907	4.63622	7.42228	6.21672	8.66082	7.65783	2.41789	4.89754	1.16744	4.06191	5.95454	0.490557	1.03483	4.39982	4.03639	5.14859	5.27712	1.37973	2.58709	2.04349	2.60056	2.1761	5.43026	4.84947	1.9825	1.75407	1.64887	1.67591	3.24184	2.63072
RCV	RCV	3.84755	3.44779	3.77017	3.37111	2.03438	2.307	1.98279	3.80243	2.45672	4.67659	2.67688	2.20342	2.67849	2.47301	4.6952	4.66071	2.20569	2.26884	4.7942	4.76705	5.95602	5.97477	8.31399	7.9784	1.69158	5.32863	2.06282	4.06918	4.97816	1.13083	0.0399482	4.00355	3.90336	5.31828	5.54795	0.935368	1.49131	1.63939	2.23481	3.06975	5.26357	5.12976	2.31143	1.12361	1.07423	2.27232	2.69557	2.35294
RCV	RCV	3.83733	3.07711	4.93963	3.28487	2.35226	2.16642	2.34388	3.59978	3.71807	3.80239	2.39298	2.98293	2.94223	3.52527	5.08644	4.54163	2.16317	3.42954	5.24083	4.54211	6.67815	6.21996	8.54797	8.24691	2.12648	5.57941	1.58818	4.17845	5.137	0.254395	1.53084	4.74187	3.89405	5.7465	5.23752	1.67774	2.87886	1.7777	3.16241	1.9315	6.06738	4.60957	2.16917	1.93926	1.25898	1.86563	2.09154	3.00223
RCV	RCV	2.89764	3.58215	5.2386	2.58923	2.89749	2.20398	2.78046	2.96196	4.4047	4.61185	2.87221	3.71224	3.28477	3.90727	5.58587	5.19018	2.89984	3.29776	4.69951	5.11987	6.7068	6.25027	8.06957	8.39357	1.84109	5.52073	1.56308	4.63724	5.52671	0.560163	0.809008	4.8922	5.26579	6.32865	6.29741	1.62664	2.45789	2.00137	3.01591	2.57426	5.22277	5.85536	2.01807	1.91325	1.24712	3.16037	3.20659	2.78195
RCV	RCV	5.2587	3.97785	6.91288	4.64304	2.7216	4.36504	2.52906	5.41465	4.86821	6.34548	3.87879	4.83768	3.40152	4.44753	7.60604	7.17802	3.73549	4.05292	6.9501	7.36042	9.97113	9.27225	13.2478	12.1146	4.45022	8.62751	2.80189	6.54414	8.78647	0.988075	1.63408	5.8175	6.35371	7.43298	7.36203	2.44994	3.32118	2.87611	4.83519	4.36714	7.64079	8.49709	2.35467	2.79854	2.44318	3.28736	4.49431	3.73232
RCV	RCV	5.33764	4.76313	5.73464	4.4929	2.63938	2.98828	3.20872	5.20732	4.17212	6.06935	4.32928	3.61381	4.22279	3.88881	6.43691	6.79835	3.6198	4.0323	7.21529	6.87165	8.58044	8.41161	11.0377	10.8219	1.99809	7.67562	2.24195	6.17797	7.27667	1.10721	1.57099	6.24284	5.82049	7.43081	7.56731	1.58808	2.27339	2.43381	3.48885	3.68231	8.52746	7.83189	3.53527	2.11821	1.99333	3.20406	4.3952	3.53559
RCV	RCV	6.06007	4.3691	6.67979	5.09491	2.53691	3.69252	3.05977	5.8932	4.18443	6.56022	4.7233	4.18513	3.85527	3.9252	7.42825	7.16022	3.56427	3.97897	7.67588	7.60356	9.7011	9.55542	12.3618	12.4935	2.97432	9.27197	3.19983	6.91653	8.64263	1.27306	1.38651	6.3951	6.0713	7.51529	7.57051	2.27759	2.49188	2.64341	4.38762	4.24754	9.02414	8.60771	3.87342	1.95658	2.37805	3.18084	4.93799	3.36555
RCV	RCV	6.21346	5.88702	5.4614	5.16571	3.33296	2.97828	3.12354	5.68684	4.49575	5.89084	4.69004	4.07434	5.53181	3.86294	5.9143	6.82401	5.03981	3.42432	8.23392	6.68213	11.2427	8.43478	13.5022	11.0347	3.00176	6.31263	1.54485	5.55832	7.71717	0.848925	1.46143	7.17222	5.44046	7.18872	7.2879	2.33228	3.68124	2.36273	3.36999	3.3047	9.86514	6.61726	2.61831	3.75654	1.56904	2.70707	5.1191	3.40789
RCV	RCV	6.02899	3.96633	6.6928	5.17913	2.56009	3.36323	3.23328	5.9689	4.30814	6.24475	4.03048	4.18451	3.64916	3.79677	7.11522	7.11065	3.63825	3.61732	7.49964	7.39494	10.1334	9.30312	12.3773	11.7421	3.17407	8.05797	2.32475	6.53888	8.49354	0.808583	1.50614	6.01378	5.85076	7.20459	7.20493	1.86944	3.10038	2.71923	4.24489	3.80232	8.51046	8.24566	3.24354	2.19901	2.76299	2.50427	4.5233	3.78309
RCV	RCV	5.62659	4.80743	6.90822	4.48711	3.01189	2.29334	4.03779	5.141	4.40213	6.30242	6.06561	4.04841	4.95445	4.08926	7.06465	6.79172	4.53772	3.36947	8.32073	6.93375	10.1838	8.80068	11.2477	10.791	2.1355	8.55556	1.9526	7.24417	9.01275	1.32033	1.03471	7.6577	6.05502	7.43848	7.51428	3.38513	2.41505	2.68722	4.40326	3.42248	10.402	7.79534	4.61368	2.42416	2.56239	2.70523	6.27712	3.07333
RCV	RCV	6.09438	4.33467	6.59231	5.14627	2.81164	3.07842	3.337	6.01644	4.78109	6.00615	4.5908	3.98364	3.94528	4.37286	7.09682	6.81842	3.65656	4.14587	7.7828	7.60755	9.63705	8.9497	12.0561	11.7765	2.57966	8.1169	2.09097	6.65644	8.00933	0.891406	1.59261	6.48757	6.26136	7.68987	8.04592	1.49481	2.3238	2.33308	4.17343	3.59767	9.10304	8.71938	3.56641	2.2837	2.89653	2.70461	5.06068	3.46153
RCV	RCV	7.03194	3.64124	6.74149	5.70922	2.25754	3.08321	3.08898	6.69061	4.27534	5.60341	4.30767	3.85361	3.42449	3.85558	7.14495	6.44449	3.15227	3.69688	8.35838	7.66038	10.0762	9.15112	12.4731	11.6736	2.96695	8.23956	1.94255	6.89211	8.69325	0.985119	1.5651	6.48591	5.60646	7.03807	7.0205	1.99505	2.73942	2.28171	4.60973	3.36826	10.21	8.59594	3.25836	2.82966	2.31534	2.81872	4.42674	3.75905
RCV	RCV	4.96022	4.01381	5.09536	4.45733	2.86636	2.46867	2.8506	5.30467	4.77728	4.96444	2.97688	4.05839	3.71212	4.46987	5.69353	5.45112	3.4962	4.00125	5.94652	6.95762	7.53478	8.15541	10.2201	10.6825	2.03493	6.24897	1.83184	4.94412	6.36566	1.24092	1.0184	4.89764	6.03189	6.90914	6.95291	1.86047	1.94794	2.05055	2.81492	3.01054	6.11257	8.21854	1.935	2.04568	1.41274	3.92122	3.32779	2.84665
RCV	RCV	3.86756	4.4056	5.24784	3.50897	3.67583	2.6896	2.39295	3.92136	5.38133	4.40639	2.76738	3.34691	4.08233	4.90623	5.66034	5.03334	3.72105	4.17783	5.23647	5.7419	7.26853	7.26347	10.1352	10.6786	2.47211	5.91852	2.15513	4.25509	5.72483	0.74956	1.02638	5.42429	5.76636	7.33532	7.26883	1.97867	2.39022	2.27008	3.2146	2.53166	5.51436	6.29642	1.87967	2.05971	1.85151	2.64579	3.29983	3.29649
RCV	RCV	4.11233	4.50497	5.22227	3.73019	3.70597	2.76033	2.35703	4.19748	5.60161	4.32706	2.90112	3.39416	4.11991	5.1406	5.72614	5.00489	3.6809	4.43826	5.44287	5.98908	7.39922	7.44343	10.5682	10.8951	2.59261	5.91944	2.03929	4.2775	5.77084	0.878572	1.18763	5.48372	5.91286	7.324	7.30638	1.60971	2.3852	2.40702	3.22346	2.50047	5.69546	6.61089	1.91399	2.09019	1.73787	2.90894	3.2923	3.36795
RCV	RCV	4.21076	3.71134	5.72962	3.72264	2.86976	2.4564	3.02037	4.16004	4.16609	5.16113	2.94619	2.67106	3.53335	3.55023	5.93754	5.88233	2.90082	3.3292	5.75682	5.60046	8.11088	7.4122	9.90734	9.48622	2.46394	5.87937	1.68157	5.00139	6.54862	0.413606	0.963248	5.25537	5.06431	6.63835	6.81999	1.17784	3.22582	3.03127	3.36516	2.80804	6.35911	6.041	1.97652	2.42204	1.81406	2.36544	2.90747	4.73523
RCV	RCV	5.09373	4.99313	5.10883	4.56685	3.16941	2.96909	2.91854	5.24408	4.49389	5.90625	3.44722	3.82842	4.37716	4.24816	6.04331	6.34168	4.00958	4.02483	6.24466	7.01929	7.63715	8.90591	11.4265	11.3755	2.24927	6.88582	2.45873	5.19882	6.80545	1.49401	1.04139	5.40854	6.09623	7.68434	7.55452	1.78921	1.93328	2.48622	2.77097	3.69543	6.51696	7.90969	2.29256	2.05139	2.30083	2.95775	3.67915	3.05561
RCV	RCV	5.06975	4.81879	4.95826	4.56963	3.01361	2.96703	2.83192	5.32353	4.3614	5.90507	3.27188	3.89517	4.16547	4.10242	5.95136	6.3141	3.89005	3.85098	6.18741	7.02052	7.5734	8.86474	11.2754	11.1466	2.20361	6.71657	2.35441	5.21152	6.77478	1.53729	0.928704	5.17522	6.0918	7.50941	7.43284	1.78094	1.88196	2.35424	2.68981	3.77649	6.36742	8.06089	2.32001	1.87367	2.36521	2.94442	3.57109	2.99401
RCV	RCV	4.56594	3.8402	5.47433	3.8847	3.31462	2.71907	1.89109	4.26147	5.20136	3.49203	3.20175	3.27883	3.52289	4.59726	5.87245	4.50038	3.08093	4.28516	6.24893	5.27861	8.02263	7.27435	10.3905	10.4394	2.68823	6.13872	1.84189	4.55736	5.59243	0.699487	1.56338	5.91143	4.87438	6.47906	6.05465	1.75285	2.95467	2.15452	3.99109	1.93151	7.29409	5.32584	2.56419	2.33114	1.74984	1.82746	3.26338	3.22523
RCV	RCV	3.74644	4.14114	5.66473	3.43482	2.59971	3.37097	3.01956	3.88671	3.70952	6.46349	3.59806	3.85488	3.41259	3.21864	6.50008	7.11829	3.09301	3.13488	5.19059	5.89003	7.7116	7.89494	10.1258	9.96664	2.55593	6.69524	2.59508	5.31215	6.72977	1.05468	1.04026	4.6897	5.43525	6.83413	7.03066	1.8594	2.4952	2.6462	3.13309	4.05392	5.38752	6.60377	1.76895	2.12926	1.83	2.94855	3.92262	2.65643
RCV	RCV	4.37277	4.44017	5.3856	3.77709	2.81416	2.44158	3.2315	4.15967	3.94864	5.39827	3.82585	3.18108	3.64667	3.8271	6.43363	5.64796	2.92959	3.45176	6.12093	5.53912	7.82106	7.35501	9.75274	9.68723	1.71583	6.79277	2.22055	4.98251	5.82332	1.44234	0.786991	5.64133	4.87365	6.85084	6.76905	1.51592	2.35689	2.33272	3.03186	2.84055	7.0205	5.79485	2.95643	1.90225	2.0137	1.999	3.61326	2.91648
RCV	RCV	5.98771	3.51791	6.57427	5.16047	2.80695	2.32654	3.56439	5.88998	4.88309	5.04439	3.74104	3.8368	3.47611	4.4457	6.61746	6.08931	3.43174	4.04018	7.21013	7.09488	9.30356	8.41692	11.4214	10.6508	2.6362	6.64034	0.944594	5.89943	7.20512	0.0902046	1.91027	5.80685	5.57878	7.21686	7.23232	3.633	2.43502	2.0743	3.92339	2.59799	8.0725	7.70851	3.07986	1.98738	1.80059	3.03825	4.66173	3.08211
RCV	RCV	5.08948	3.06036	6.76088	4.4909	2.62595	2.2389	3.80129	5.13394	4.488	5.41903	3.59447	3.41363	2.90449	4.07236	6.94557	6.17369	3.25079	3.77088	6.57729	6.44207	8.56756	7.75067	10.5518	9.85134	2.64071	6.81675	1.14234	5.93684	7.37455	0.385717	1.4202	5.38963	5.39958	7.45666	7.51259	2.3779	1.92337	2.0418	3.89231	2.73976	7.20141	7.10768	3.06925	1.67664	1.7448	2.94281	4.77657	2.94128
RCV	RCV	4.0462	4.42032	4.32559	3.54514	3.47323	1.84527	2.34438	3.94748	4.49226	4.04028	2.85954	2.33172	4.14797	4.34631	4.70416	4.25504	3.46011	4.27992	5.6953	4.99333	7.05796	6.43416	9.22376	9.59974	1.51353	5.66124	2.16114	3.86867	4.86222	0.757315	0.571945	5.5334	5.05027	6.5878	6.71464	1.38583	2.23657	1.97005	2.57948	2.15328	6.40981	5.25516	2.60001	1.78242	1.62858	1.96865	2.99942	3.41071
RCV	RCV	4.42933	3.76021	5.37472	3.90715	2.75253	2.627	2.67846	4.33806	3.72676	5.21993	3.4138	3.83808	3.36884	3.55935	5.85202	5.49566	2.99462	3.21625	5.6905	5.6315	7.64251	7.79666	10.0215	10.0948	2.43566	6.94995	2.64772	4.80183	6.23461	0.751107	0.720469	5.04692	4.82502	6.39004	6.1691	1.74871	2.24724	2.02918	3.23725	3.06776	6.22464	5.9417	2.05805	2.1361	1.98235	2.02283	3.69643	1.98478
RCV	RCV	4.55066	3.70854	5.47786	4.0164	2.63821	2.80059	2.66909	4.48231	3.83441	5.21401	3.46339	3.81568	3.22749	3.63847	6.08797	5.56356	2.97859	3.21091	5.78981	5.78779	7.64572	7.89053	10.2019	10.2211	2.52976	6.97512	2.56801	4.89412	6.30883	0.926874	0.867606	5.0043	4.86328	6.51072	6.31443	1.71045	2.11889	1.98356	3.34016	3.0864	6.31045	6.15816	2.07099	2.163	2.02025	2.11225	3.78663	1.99214
RCV	RCV	5.14991	4.77964	4.89075	4.53489	2.67393	2.43476	3.40683	5.06357	3.35606	6.15221	3.62818	3.31334	4.4181	2.89114	5.55022	6.9157	3.89799	3.53965	6.30657	6.34169	7.63228	8.44686	10.2015	10.3335	1.3083	6.29086	2.26994	5.19814	6.27337	1.31203	1.28152	5.22962	5.08234	7.07499	7.07499	1.31379	1.95653	2.12533	2.43818	3.49441	6.82478	6.68735	3.2752	1.1795	1.84447	2.51908	3.68097	2.61985
RCV	RCV	5.00084	4.99496	4.63734	4.54152	3.37494	2.53884	2.8338	5.05619	4.058	5.68093	3.09718	3.03667	4.45207	3.84044	5.44016	5.93886	4.12245	3.40388	5.95632	6.36671	8.45356	8.8042	10.9296	11.0892	1.80135	6.0215	2.55921	4.52889	5.94255	1.31388	0.496454	5.20401	5.50969	6.74226	6.8488	1.2666	2.9369	3.3261	2.34993	3.40301	5.94883	6.68584	1.46003	2.46135	2.98644	1.41464	3.21537	4.24413
RCV	RCV	4.9384	4.98938	4.67778	4.43639	3.38196	2.45291	2.84957	4.89807	4.08929	5.49891	3.22296	3.00908	4.59031	3.85422	5.39048	5.77257	4.058	3.43369	5.94748	6.21725	8.34451	8.77913	10.7437	10.9352	1.83371	5.88148	2.45524	4.45859	5.96924	1.36147	0.4946	5.34089	5.38009	6.61734	6.72618	1.61176	3.08318	3.27041	2.40959	3.20611	6.13399	6.43509	1.50316	2.55888	2.88743	1.37208	3.00266	4.2451
RCV	RCV	4.55499	2.30644	5.1258	3.94801	1.58468	2.02392	2.83324	4.86026	3.03125	4.8991	3.02794	3.31026	2.14275	2.8433	5.39547	5.30793	2.30711	2.74739	5.3363	6.17093	6.67543	7.11739	8.26078	8.56688	1.88149	6.49315	1.51585	5.43446	6.6317	0.614993	0.955482	3.9817	4.94154	5.40884	5.67938	1.00234	1.37472	1.80009	2.99435	3.10866	5.8627	7.57799	2.52628	1.1111	2.24591	2.45416	3.57142	2.34931
RCV	RCV	5.82549	3.92752	4.40148	4.94161	2.62541	1.59341	2.84646	5.96561	3.53773	4.99162	3.84523	3.4354	3.72627	3.43952	4.74058	5.15309	3.48935	3.0608	6.62372	6.87395	8.19587	8.41358	9.7764	9.79217	1.26186	6.17494	1.52775	5.14287	6.06367	0.804886	0.527669	5.13293	5.45201	5.66039	5.70851	1.21219	1.70209	2.39844	2.49398	3.07888	7.49562	8.12026	2.65741	1.76038	2.12367	2.65458	4.24733	2.61884
RCV	RCV	4.84181	3.93996	4.84944	3.92522	2.21846	1.98442	2.92262	4.8226	3.3595	5.39502	4.23598	3.61089	3.81067	3.26625	5.30091	5.60963	3.1259	2.934	6.50414	6.39293	7.69132	7.76147	8.89322	9.27379	1.26181	7.35219	1.99125	5.99132	6.92119	1.22528	0.72492	5.62023	5.53262	5.61395	5.83606	1.7786	2.08388	2.41356	3.02315	3.45174	8.02098	7.84786	3.72097	1.45219	2.26975	2.79059	3.90842	3.08915
RCV	RCV	5.42843	3.34974	4.87361	4.62132	1.96716	2.63521	2.3983	5.28668	3.0697	4.93892	3.04787	2.61905	3.116	2.69453	5.30255	5.50985	3.54395	2.75485	6.15238	6.20837	8.30746	7.84762	9.74388	10.0896	2.0115	6.39648	2.34436	4.96195	6.39805	0.93936	0.976184	4.64393	4.4598	5.6569	5.84628	1.95302	2.25703	2.30465	3.05675	3.1142	6.91251	6.71655	2.46018	1.7078	1.86459	2.18165	3.81064	3.4165
RCV	RCV	4.82316	3.18902	3.87382	4.15844	2.11988	1.74235	2.22723	5.18344	3.31026	4.28017	2.7272	3.13494	3.01699	3.15731	4.18788	4.56587	2.86804	2.75895	5.66608	5.95615	7.05019	7.04927	8.56974	8.65936	1.39509	5.51876	1.52522	4.52215	5.53488	0.74673	0.737841	4.25141	4.91087	4.89816	5.05964	1.94696	1.91351	2.01976	2.30845	2.77429	6.29599	7.36189	2.33502	1.42552	1.63858	2.74392	3.00952	2.89624
RCV	RCV	4.3435	3.40936	3.71484	3.70108	2.14761	1.94102	1.98188	4.73842	2.67941	5.09254	2.93691	3.59479	3.32971	2.57341	3.99145	5.22407	3.26612	2.51218	5.37176	5.97446	6.83338	7.46979	8.61206	8.65393	1.85305	6.23669	2.12272	5.1896	6.78921	0.860361	0.320937	4.36109	5.24783	4.84519	4.87866	1.05109	1.82959	2.05833	2.30515	3.72672	6.16797	7.64989	2.05854	1.77579	1.94636	2.80974	3.32288	2.69112
RCV	RCV	4.98648	4.41386	3.69572	4.20576	2.05477	3.02265	1.76247	4.90109	3.69798	4.27273	3.03299	3.46387	3.73338	3.22805	4.93591	5.05026	3.49033	3.2359	5.63916	6.31703	6.61925	7.66052	9.58529	9.88025	1.5882	5.27468	2.00537	4.23169	5.23661	1.81656	1.27217	4.59279	4.83106	5.86458	5.72264	0.874341	1.68584	1.69553	2.32873	2.98427	6.45265	7.2462	2.03264	1.96706	1.94076	2.55161	3.02907	2.42933
RCV	RCV	4.66244	4.05053	3.69221	3.99077	2.15208	2.43313	2.04213	4.81765	2.87094	5.12955	2.82597	2.24067	3.42098	2.8269	4.69705	5.18444	3.11539	2.75775	5.5868	6.07184	6.96623	7.80389	9.06706	9.4686	1.40993	6.50332	2.51959	4.90547	5.85494	1.47206	0.205644	4.51077	5.00779	5.47798	5.92678	1.41453	2.00916	3.06194	2.19707	3.63778	6.32098	7.27528	1.92477	2.02329	2.62206	1.92703	2.84539	4.22213
RCV	RCV	5.57613	3.57489	4.3025	4.6236	2.22839	1.75929	2.54407	5.6949	3.26975	4.77542	2.90633	3.69036	3.45577	3.14851	4.48115	5.13861	3.21684	2.9732	6.35968	6.61702	7.62595	7.74969	9.81926	8.82712	1.97678	5.87761	1.06233	5.20229	6.68447	0.504686	1.00076	4.92252	5.21156	5.60474	5.45684	0.920307	2.1198	1.72778	2.60608	3.09784	7.48372	8.05847	2.12863	2.2539	1.5644	3.15663	3.22937	2.9723
RCV	RCV	4.13387	3.44	4.9698	3.43844	2.75767	2.38014	1.85725	3.93439	3.08104	4.92295	2.65163	2.53639	3.36682	3.17124	5.05393	4.83718	2.82712	2.60837	5.78677	5.2024	7.55047	6.945	9.82299	9.17727	2.99673	6.68695	2.59964	5.15425	7.36917	0.224913	0.156963	5.41718	4.77306	5.80796	5.64719	1.91356	3.45066	2.67282	3.57488	3.4228	6.94921	5.81633	2.65382	2.01207	1.46052	2.44641	2.4858	4.89842
RCV	RCV	4.40311	4.35116	5.62264	3.92117	2.92181	2.56445	3.39585	4.58274	4.51673	5.86396	2.96613	3.55126	3.79963	4.12412	6.27317	6.51038	3.48573	3.94803	5.88396	6.77476	8.08749	8.22791	9.89686	10.2924	1.74129	6.81533	1.90639	5.59403	6.42926	0.917484	1.25061	5.33838	6.17853	7.49462	7.66547	1.37743	2.61129	2.73987	2.98968	3.47691	6.39071	7.89722	2.57018	1.86383	2.40413	3.07454	3.50681	4.26987
RCV	RCV	5.90111	3.77418	6.98666	4.90394	2.43974	3.47179	3.03095	5.39722	3.99742	5.84457	4.11128	3.0922	3.4422	3.34255	7.42179	6.74598	3.14721	3.45803	7.76594	6.37579	9.12923	8.45342	11.9175	11.4711	2.97141	8.04934	2.64224	6.34675	7.93681	0.802155	1.32482	6.47948	4.76558	7.73667	7.46764	1.98615	2.66	2.1795	4.78183	3.3341	9.3042	6.32881	3.60601	2.4034	2.25099	1.84215	4.36365	3.64349
RCV	RCV	6.1579	4.16157	6.25769	5.3459	2.46923	3.32568	3.25043	6.02115	4.30007	5.88779	4.24931	3.3285	3.3808	3.68349	7.30126	6.73841	3.81833	3.78507	7.47835	7.072	9.89193	8.94837	12.0318	11.5032	2.53097	6.98665	1.98974	5.81873	6.98499	1.45424	1.29936	5.75464	5.27492	7.28989	7.63717	1.59664	2.34652	2.37817	3.80654	3.3433	8.28587	7.40036	3.14164	2.06808	3.22067	1.43173	5.09421	3.15294
RCV	RCV	6.4233	6.03013	4.53787	5.44451	3.75204	2.53766	2.66793	6.22062	5.51423	4.72031	4.40966	2.77335	5.86212	5.27764	5.34214	5.3304	5.66465	5.44128	7.91646	7.26609	9.75105	9.2243	12.3799	12.1797	1.72505	6.1479	1.94536	4.70031	6.0804	1.91732	1.45814	6.78925	6.17214	7.31307	7.89383	1.97044	2.47489	2.95721	2.70414	2.69056	9.15587	7.82145	3.58361	2.1181	2.92457	1.94018	4.81313	4.22951
RCV	RCV	5.84496	5.08433	6.13799	4.90067	3.13508	2.68719	3.58702	5.39943	4.39869	5.96822	5.45645	3.0012	4.56738	4.23599	7.21592	6.16722	4.26979	3.90659	7.83725	6.55398	9.20383	8.53894	11.4737	11.5688	1.7439	7.71173	2.53399	5.85671	6.96826	1.94745	0.464645	6.87274	5.36347	7.8538	7.97836	1.4271	1.84307	2.47118	3.69073	3.10245	9.30147	6.61836	4.50879	1.6079	2.35265	1.99986	5.60637	2.74466
RCV	RCV	6.07533	4.76733	6.24421	5.01706	3.15848	2.18968	3.74526	5.55081	4.14957	5.91127	3.78188	2.81446	4.62385	4.01973	6.50077	6.26164	4.52492	3.75082	8.10413	6.512	9.98381	8.31423	11.8719	10.8575	2.28714	7.74303	2.08757	6.05464	7.78178	0.807211	1.06577	7.02542	5.28787	7.98928	7.70757	1.662	3.30212	2.54599	3.83203	2.95759	9.79129	6.52753	3.32774	2.98271	2.10675	2.10458	4.43845	4.81821
RCV	RCV	5.70033	5.29345	5.67609	4.64826	3.31069	2.84686	2.78742	5.40686	4.93916	5.46564	3.82787	3.35926	4.91284	4.67837	6.36674	5.87936	4.89824	4.38881	7.74991	7.17406	9.32035	8.93044	11.5664	11.7327	2.10826	7.83575	2.48051	6.07872	7.4186	1.41548	0.954222	7.10679	6.3148	8.0235	7.66116	1.53629	3.05214	3.00469	3.7399	3.40906	9.50141	8.22706	3.30524	2.94937	2.93769	2.47868	4.37056	5.20362
RCV	RCV	6.20953	4.3486	6.52442	5.41338	2.79523	3.3047	3.37902	6.15584	4.20308	6.57593	3.64809	3.58985	4.36593	3.75745	6.50721	7.60227	3.98988	3.84604	7.65894	7.39698	9.6533	9.25639	12.5297	12.2261	2.77063	8.16166	2.71015	6.32814	7.98494	0.0306104	1.8735	6.05198	5.80813	8.11281	8.03684	1.87376	2.67829	2.54303	3.95987	3.93091	8.46024	7.97201	2.88402	2.51117	3.04761	2.03326	4.46772	4.0276
RCV	RCV	5.73974	4.41921	6.55078	4.75896	2.80127	2.58083	3.71338	5.22678	3.82595	6.16366	4.07716	3.82884	4.21527	3.35622	6.7771	6.8482	3.91237	3.27404	7.66843	6.38158	9.62443	8.38011	11.2401	10.6659	2.10288	7.50599	2.06231	6.21451	7.35711	0.404412	1.15316	6.69318	5.03702	7.718	7.19423	2.05463	2.97892	2.15387	4.01636	3.20445	9.22238	6.41369	3.48225	2.57348	2.34425	1.86638	4.66608	3.30692
RCV	RCV	5.92236	3.60681	8.19448	4.70557	2.9526	3.62243	2.80161	5.00746	5.21019	4.76801	4.50591	2.88258	3.30584	4.07685	8.60244	6.33069	2.92771	3.86142	8.5269	5.84506	9.93903	7.75672	12.4269	11.8143	3.42373	8.5102	2.13337	6.91136	8.10454	0.805984	2.00664	7.7272	4.53145	8.24499	7.72326	1.36176	3.4043	2.07787	6.19746	2.34807	10.7071	5.17986	3.76905	3.36081	1.79825	1.65416	4.56291	4.09957
RCV	RCV	5.56133	5.23994	4.796	4.74238	2.75476	3.39503	2.40828	5.14388	3.5062	5.77641	4.0219	3.18089	4.49018	3.19234	5.93596	6.21152	4.32507	3.38109	6.91822	6.07905	8.8109	8.2614	11.7382	11.2708	2.27172	6.75718	3.08337	4.90298	6.55703	1.70332	0.813578	5.84366	4.60285	7.0341	6.91954	1.54012	2.2533	1.99068	2.98672	3.69991	7.94334	5.79762	3.03479	2.07653	1.37036	2.36051	4.42326	2.51007
RCV	RCV	5.1562	5.46225	4.69561	4.61005	3.4163	2.30179	3.36385	5.19337	2.05157	8.17952	4.10693	3.45426	5.04994	2.18058	5.35397	8.05698	4.05559	2.63491	6.43589	6.63377	8.15937	9.31544	11.12	10.9823	1.54018	7.23784	3.52229	6.62065	8.04593	1.24668	0.193713	5.67022	5.83924	7.23877	7.38759	1.26862	2.09009	2.69634	2.24927	5.4297	6.80053	7.16162	2.59745	1.9187	1.91619	2.8342	3.99203	2.75465
RCV	RCV	4.96198	4.09452	4.80802	4.20279	2.88379	2.35701	2.29962	5.47307	4.97434	4.84516	3.62438	4.24321	3.65917	4.77775	5.3477	5.16946	3.43365	4.26729	6.36532	7.52515	7.916	8.80582	9.75983	10.5766	1.66055	7.03728	2.02183	5.67058	6.37686	0.835301	0.836228	5.55828	6.90238	6.20011	6.44054	1.08582	2.10554	2.7709	3.11829	3.40497	7.41843	9.74807	2.67922	2.09981	2.61445	3.6481	4.02743	3.77307
RCV	RCV	5.37729	4.59049	5.17167	4.15278	2.7152	3.12426	1.69968	4.78163	5.3722	3.3086	4.79115	3.77248	4.45666	4.46415	5.50727	4.88596	4.51181	4.11508	7.35861	6.07283	9.60547	7.66822	10.3134	10.6201	2.04435	6.19886	1.66264	5.05197	6.16833	1.02164	2.14359	6.72241	5.13325	5.81731	5.74068	1.93349	2.69704	2.20119	3.99226	2.03214	9.49137	6.80197	3.39525	2.73104	2.18651	2.21696	5.32444	2.90506
RCV	RCV	5.25327	4.38701	7.36114	4.73167	2.53757	2.93502	5.10908	5.31125	3.94637	7.93145	3.77531	3.73264	3.76022	3.43945	8.2023	8.77955	3.33651	3.64628	7.01831	7.11688	9.34658	8.89182	11.2359	10.9711	1.96701	7.99037	2.02464	6.81498	8.01595	1.2996	1.48617	5.73739	5.92485	8.70667	9.07025	1.45958	2.91472	2.69961	3.56535	4.07681	7.46575	7.72893	3.19572	1.96502	2.3115	3.03059	3.9601	4.08406
RCV	RCV	3.79514	4.3846	5.25737	3.43697	3.34385	2.62756	2.76059	3.83509	4.28253	5.46095	3.27964	3.57298	4.13142	4.04185	5.64189	5.7631	3.63716	4.10144	5.43884	5.42572	7.7665	8.20983	10.1987	10.2628	2.60455	6.61831	2.74395	4.65539	6.72798	0.854496	0.606331	5.32591	5.42206	6.78654	6.66066	1.20947	2.72553	2.68656	3.01712	3.20732	5.82522	5.90034	2.29229	1.88862	2.01763	2.21626	3.53548	3.1558
RCV	RCV	5.75201	5.28636	5.38592	4.68018	2.94646	3.44026	2.29689	5.18896	4.11853	5.50907	5.52896	3.23648	4.65116	3.70665	6.36008	6.00524	4.07799	3.6029	7.71853	6.30471	9.45573	8.61489	11.6543	11.805	2.1683	7.2789	3.10611	5.54144	6.85095	1.57553	0.774388	6.84264	5.11933	6.62171	6.88089	1.23782	2.40687	2.58818	3.7525	3.58532	9.48172	6.46536	3.6571	2.50437	2.46679	1.73731	5.43957	2.72584
RCV	RCV	6.50106	4.41715	6.07262	5.12905	2.47999	2.95241	2.84356	5.64074	3.47512	5.62649	4.66611	2.98818	4.16537	3.18451	6.61554	6.03588	3.66682	3.29944	8.04869	6.52503	9.38951	8.05523	11.6465	11.3501	2.38546	8.0124	2.80034	6.08446	7.71843	1.28443	0.791553	6.80932	4.6183	7.01373	6.96081	2.41879	2.46485	1.92297	4.16395	3.30142	10.1991	6.38392	3.64417	2.6526	2.3403	1.61441	4.60011	3.21275
RCV	RCV	5.61322	5.55756	4.63394	4.48893	3.56634	2.70181	1.88207	5.02273	3.70403	5.41535	4.6055	3.46046	5.50585	3.50563	4.70409	5.64128	4.58883	3.42661	7.381	6.25432	9.13653	8.37643	11.3	11.8773	2.20352	7.41003	3.68604	5.33655	7.23959	0.311574	0.406444	7.0022	5.5013	6.50126	6.31141	2.09535	2.63579	2.41609	3.29481	3.85325	9.23121	6.61118	3.47245	2.48045	1.92142	2.34189	4.68447	3.19007
RCV	RCV	5.72019	5.95314	4.98252	4.75951	3.90988	2.67297	2.51623	5.29426	5.34699	4.77439	5.14718	3.31593	5.72419	5.01216	5.63699	5.25602	5.48984	4.69987	7.7471	6.47236	9.63651	8.97955	12.0316	11.9112	2.07276	6.52801	2.32953	4.85705	6.43306	1.60168	0.957049	7.23158	5.89768	7.2578	7.24384	1.75339	2.3725	2.78914	3.21571	2.73696	9.28567	6.70492	4.15943	1.95772	2.58621	1.82518	5.59959	3.17608
RCV	RCV	5.63507	5.64133	5.02818	4.61329	3.68061	2.67846	2.37581	5.07786	5.16615	4.44833	4.92477	3.17318	5.41645	4.80232	5.62528	5.0374	5.0271	4.50111	7.48033	6.27924	9.83476	8.39219	11.8241	11.4248	2.36917	6.32979	2.087	4.7492	6.47692	1.48038	1.15085	7.07117	5.51786	6.63123	6.82636	1.69774	2.86999	2.77784	3.33568	2.5287	9.12599	6.38411	4.09582	1.87951	2.21728	1.96208	5.12171	3.46073
RCV	RCV	5.35666	5.40865	5.54208	4.44584	3.5226	2.914	2.65213	4.9504	4.70032	5.41989	4.29937	3.12078	5.19431	4.16704	5.84084	6.12028	4.13279	4.02922	7.46629	6.37017	8.80847	8.02066	11.9994	11.2998	2.6696	6.83607	2.32798	5.48241	7.43104	0.727676	1.1052	7.0124	5.71258	7.59666	7.61083	1.74557	2.81069	2.559	3.63565	3.2704	8.98667	6.74	3.88149	2.16257	1.98338	2.54458	4.05175	4.05267
RCV	RCV	5.82762	5.12626	4.93349	4.91424	3.13904	3.05775	2.28629	5.63098	4.09755	5.62277	5.04308	3.61292	4.55851	3.88503	5.7115	5.89891	4.09038	4.03195	7.70352	6.48684	9.34572	8.87228	11.8631	11.7616	2.10803	7.4769	3.14687	5.45961	6.80465	1.23439	0.599907	6.43944	5.52663	6.59438	6.73175	2.29084	2.21017	2.41786	3.32295	3.73514	9.07361	6.99435	4.09892	1.64816	2.22009	2.2094	5.24752	2.48557
RCV	RCV	4.91054	3.86661	5.67609	4.19759	3.43472	2.45532	2.26717	4.75838	5.08853	4.15846	3.92812	3.52946	3.75845	4.83959	5.79254	4.72594	3.50414	4.38201	6.54399	5.99993	8.47448	8.00953	10.7394	10.8354	2.66748	7.00012	2.20537	5.04509	6.28633	0.224981	1.28956	6.04819	5.52626	6.38275	6.36532	1.90421	2.53231	2.38323	3.92833	2.39807	7.56879	6.52837	3.25446	1.74407	2.00552	2.30658	4.49568	2.96542
RCV	RCV	4.97402	5.45642	4.82108	4.33455	3.40604	2.39885	3.15132	4.77098	4.55587	5.30211	3.83725	3.01163	5.08738	4.46705	5.65196	5.72487	4.97649	4.72171	6.43333	6.18552	8.35899	8.59847	10.9864	10.5755	1.823	6.27706	2.0771	4.62559	6.08307	1.6717	1.31278	5.98661	5.44186	7.39911	7.36448	1.23762	2.24638	2.6067	2.52617	2.82885	7.19644	6.40948	2.81807	2.03334	2.847	1.47256	4.37382	3.32349
RCV	RCV	5.31867	3.45967	6.19656	4.3899	2.83227	2.02646	3.11129	4.83085	4.29867	4.47191	3.61016	3.39315	3.38351	4.15979	6.27559	5.15315	3.09424	3.92995	6.80354	5.88483	8.46722	8.14857	10.0769	9.79735	2.1425	6.78518	1.46575	5.47038	6.20313	0.136711	1.61702	6.05137	4.71568	6.56836	6.07446	1.86373	2.8468	2.22823	3.97684	2.15467	8.20279	5.93869	2.98309	2.30699	2.16759	1.66184	3.97406	3.24098
RCV	RCV	5.86534	5.28309	6.26166	4.65218	2.48858	3.22077	3.44753	5.17995	4.16201	6.03368	4.97378	2.75385	4.57591	3.67422	7.47703	6.84805	4.17871	3.49355	8.51687	6.3904	9.46965	7.97725	11.6599	10.7383	1.99107	7.72014	2.04543	6.48308	7.54432	1.96459	1.42137	7.50543	5.08504	7.93621	8.00576	1.53334	2.84613	2.52216	4.12883	3.28521	10.7063	6.6595	4.63515	2.46602	2.54844	1.87766	4.87028	4.44918
RCV	RCV	4.45766	4.04108	5.17965	3.83769	2.3928	2.79423	2.75129	4.3327	2.83898	6.12327	3.75097	2.33928	3.37466	2.91369	6.11069	6.05232	3.22472	2.78976	6.03043	5.68878	7.36131	7.58546	9.65433	10.0092	1.89141	7.26437	3.05093	5.56165	6.7371	1.35305	0.141413	5.24956	4.81515	6.67516	6.9413	1.24396	1.80524	2.67877	3.13254	3.90799	6.91954	6.21047	3.12002	1.54516	2.31858	1.87305	4.05495	3.47016
RCV	RCV	4.62733	4.35261	6.52431	3.88874	3.1326	2.80031	3.20788	4.23902	4.53047	5.43369	4.96221	3.41641	3.83656	4.07523	7.19201	6.00096	3.32474	3.25635	7.04105	5.57274	8.66322	8.12667	10.8094	10.3198	2.48909	7.12213	2.04608	5.72072	6.8675	1.06304	0.901601	6.66546	5.0633	6.96749	6.887	2.26983	2.78156	2.907	4.19949	2.80395	8.37774	5.67896	4.00007	1.8793	2.28101	1.70338	4.88721	3.0913
RCV	RCV	4.98711	4.4484	5.85176	4.1835	3.50401	2.75722	2.3792	4.74371	5.09533	4.70211	4.04958	3.33644	4.21871	4.7746	6.13528	5.23212	4.11948	3.80631	7.19816	6.05125	8.92944	7.76663	11.3466	11.1423	2.73376	7.43354	2.44373	5.45837	6.96681	0.58034	1.10409	6.69822	5.7204	7.18348	7.00733	2.19182	2.72647	2.53956	4.10471	2.80015	8.57411	6.61071	3.51316	2.26431	2.05095	2.40448	4.69585	3.81739
RCV	RCV	4.49307	2.89396	6.89053	3.78475	1.90592	2.51541	3.82066	4.26431	3.12217	6.16414	3.26204	2.93216	2.73663	2.88844	7.20522	6.6213	3.56679	2.55533	6.38462	5.81217	8.56411	7.16797	10.0309	9.0287	2.87285	7.96718	1.88593	6.5631	8.55208	0.829555	1.01618	5.5424	4.7481	7.20836	7.05612	2.88648	2.66078	2.26789	4.17359	3.32141	7.56384	6.37631	3.13353	2.06034	2.19846	2.17127	4.43042	4.03799
RCV	RCV	4.63583	4.1347	5.81517	3.85903	2.4915	2.68656	3.10456	4.27192	4.07568	5.09313	3.45724	2.64176	3.84139	3.75554	6.4173	5.84884	4.0816	3.53353	6.65257	5.57814	8.2819	7.19379	10.1805	9.59737	2.27145	6.84201	1.86058	5.41264	6.88567	1.30132	1.51098	6.00939	4.69409	7.18701	7.03443	1.77773	2.78329	2.32069	3.63913	2.66807	7.98799	5.86046	2.57665	2.87261	1.88976	2.10829	4.05989	4.13851
RCV	RCV	4.18479	4.24293	5.92333	3.68166	3.07705	1.92014	3.94679	4.01588	4.46374	5.29217	3.38879	2.96883	4.02688	4.44774	6.28462	5.90361	4.14549	4.32035	6.12988	5.3118	8.40773	7.28528	9.59838	9.25676	1.73282	6.29319	1.52055	4.94305	6.15377	0.894302	1.74779	5.75624	4.9405	7.44678	7.25452	1.7524	2.64455	2.41794	3.10627	2.27993	6.89069	5.43305	2.15954	2.72324	1.97146	1.878	4.27525	3.52141
RCV	RCV	6.11292	4.42116	6.06855	4.90294	2.9302	2.5076	2.9756	5.42441	3.84594	5.46229	4.71353	2.5948	4.17719	3.568	6.36309	5.84662	2.88068	3.5568	7.69214	6.53882	8.95523	8.60155	11.4921	10.8437	2.43264	7.47197	2.15573	5.96717	7.3473	0.574199	0.765915	6.79256	5.06175	6.92002	7.1325	1.48837	2.42865	2.60959	4.02274	3.11185	9.58142	6.65218	4.05631	2.0074	2.05026	2.155	4.18341	3.79595
RCV	RCV	6.12716	3.59614	6.67516	4.92154	1.98883	2.96847	3.29295	5.53343	3.70874	5.56725	4.43486	3.2964	3.25401	2.95861	7.19275	6.58878	3.012	3.08605	7.56898	6.74668	9.07227	8.4058	10.9459	10.459	2.34545	7.42661	1.73922	6.54043	7.73286	0.994982	1.40112	6.27004	4.84876	6.95238	6.87133	1.36888	2.3576	2.15419	4.40232	3.11848	9.4045	7.14992	3.73754	2.15762	2.02198	2.45896	4.57107	3.29274
RCV	RCV	5.18787	5.33834	5.92674	4.44686	3.26226	2.77736	3.61641	4.93732	3.75295	6.96809	4.07317	2.7868	4.91708	3.41811	6.51226	7.35321	4.20619	3.16301	7.27658	6.47095	8.89418	8.14745	11.2966	11.2556	1.81971	7.49552	2.85771	6.19684	7.53294	1.08557	0.608337	6.63956	5.70298	8.19781	8.3604	1.07224	2.71607	2.94895	3.37558	4.03812	8.43172	6.84635	3.51512	2.25795	2.23485	2.45963	4.19466	4.53233
RCV	RCV	4.93918	5.24982	5.05341	3.85994	2.33898	2.87021	2.84272	4.26222	3.03062	5.86046	5.16125	3.2991	5.07396	2.41227	5.45573	6.7602	4.10586	2.73535	7.25262	5.60577	8.65561	7.68729	10.3572	9.44177	1.963	6.63649	2.27912	5.80417	7.41228	1.12421	1.28536	6.71245	4.56022	6.14423	6.06257	1.93017	2.65451	2.56021	3.27736	3.5517	9.22392	5.8763	3.8173	2.41769	1.56613	2.40691	4.73031	2.98774
RCV	RCV	4.61709	5.12885	5.13163	3.76269	3.01022	2.44715	2.90438	4.18978	4.71151	4.59936	3.49389	2.76785	4.66759	4.15834	5.89112	5.46541	4.54769	4.03302	6.95395	5.63491	8.8602	7.36367	9.73379	9.78749	1.29736	6.01105	1.5805	4.9978	5.70633	1.38735	1.40963	6.62634	5.11833	7.24181	6.93667	1.49715	3.32894	2.59915	3.21527	2.38611	8.52406	6.03788	3.4702	2.40857	1.39401	2.78077	3.8887	4.81712
RCV	RCV	5.33772	4.68934	6.11624	4.58238	3.70303	2.73173	2.84174	4.97407	4.97741	5.09201	3.44467	2.61363	4.61292	4.41896	6.201	5.81569	4.29568	4.29478	7.09217	6.11313	8.93518	8.02196	11.8157	11.6275	2.81192	6.81352	2.31583	5.14855	7.04653	0.225107	1.1173	6.62223	5.42839	8.07068	7.9284	1.22006	2.88838	2.463	3.93423	2.72942	8.15084	5.98166	3.03862	2.42117	1.93816	2.07204	4.1366	4.31165
RCV	RCV	4.29247	5.42776	4.77925	3.68238	3.10919	3.03615	2.61095	4.56272	4.93635	5.91326	3.4695	4.77458	4.70396	4.73172	5.74061	6.50724	4.10902	4.4088	6.4108	7.38698	7.87932	8.15872	10.7946	10.2455	2.10713	7.11861	1.86019	5.98539	7.21115	1.39438	1.5094	6.09838	7.11991	7.58598	7.72412	2.11609	2.56402	2.18382	2.87252	4.10598	7.45347	9.09786	2.71631	2.53096	1.96466	4.45077	3.63183	3.90406
RCV	RCV	3.73635	4.56393	6.38135	3.27156	3.46512	2.43796	3.68067	3.87457	5.23809	6.11212	2.42613	4.11219	4.24808	4.82386	6.81063	6.6134	3.95057	4.32041	6.32119	6.79927	7.56454	8.02052	10.2362	9.92309	2.32478	7.26051	1.6082	6.37213	7.81592	0.859424	0.83635	6.37012	6.94945	9.01892	8.5877	1.64487	3.42188	2.44113	3.65441	3.56237	7.21384	8.03661	2.9361	2.44302	1.68138	4.31002	2.8259	5.31418
RCV	RCV	4.52721	4.84946	4.60559	4.04932	2.94353	2.28652	3.22694	4.83511	3.79893	6.29918	3.90263	3.96093	4.40891	3.83291	5.45362	6.48003	4.17402	4.15382	5.90655	6.78704	7.95235	8.86234	10.2554	9.87651	1.72311	7.11371	2.06809	5.62221	7.02596	1.54547	1.01552	5.17802	6.22653	6.54275	6.86838	1.50674	2.17018	2.75379	2.26171	3.98992	6.32472	8.0891	2.90279	1.37479	2.06606	3.40443	4.26426	2.90345
RCV	RCV	4.04889	5.64345	6.11589	3.60277	4.09388	2.3278	4.04197	4.02482	4.69255	6.99689	4.23621	4.05046	5.30432	4.51596	6.5945	7.19125	4.56835	3.94296	6.3893	6.40949	8.16242	8.80048	10.7071	11.0578	1.76539	7.47723	2.65328	5.96717	7.34008	0.99425	0.365616	6.71738	6.65909	8.56844	8.49337	1.83198	2.60503	2.84476	3.09944	3.85041	7.12443	7.09552	3.02982	2.2732	2.06198	3.22018	4.44714	3.45006
RCV	RCV	4.24272	6.13741	4.74956	3.79485	3.49102	2.9638	3.28292	4.22416	4.14269	6.69668	3.67487	3.93116	5.42107	3.84913	5.88363	7.35679	5.10574	3.94207	6.11667	6.14479	8.2525	8.6599	11.0994	10.679	1.67217	6.8896	2.70871	5.36533	6.74913	1.7849	1.44779	5.96417	5.93074	7.84935	7.5215	0.945147	2.78169	2.93898	2.31731	4.02812	6.6946	6.68855	2.68524	2.13258	2.05757	2.75753	4.04603	3.52007
RCV	RCV	3.76189	5.54627	4.8821	3.33247	3.24925	2.23802	3.75071	3.91798	5.49433	5.36673	3.51321	4.18378	5.00375	5.16874	6.05928	6.25112	4.47394	5.03419	5.73696	6.76114	7.07871	8.55541	9.31619	9.35135	0.867556	5.62832	0.842506	5.09449	5.68217	2.04221	1.86606	5.76233	6.64273	7.68865	7.70732	1.15742	2.432	2.70993	2.28835	2.98671	6.41604	7.94388	2.56177	2.15732	2.50147	3.33744	3.41766	3.72471
RCV	RCV	3.92545	4.71032	5.0309	3.43646	3.11276	2.48363	2.93136	4.05734	4.60397	5.46452	3.43243	4.09064	4.27263	4.4247	5.69266	5.8569	3.57626	4.23566	5.75929	6.43456	7.74288	8.05762	9.77216	9.86772	1.91169	6.81525	2.03775	5.34191	6.62449	1.1836	1.07372	5.61178	6.22638	6.80985	6.88667	1.62394	2.71964	2.56449	2.82488	3.383	6.5193	7.59729	2.48824	2.15868	2.12326	3.29473	3.37878	3.62385
RCV	RCV	3.73681	5.17961	4.83996	3.40669	3.44695	1.89914	3.78833	4.09684	3.14272	7.84221	3.10173	3.9193	4.86503	3.01954	5.48465	8.01932	4.3729	3.17165	5.28689	7.05398	6.69844	8.77444	9.63671	9.89798	1.47519	7.83145	2.42365	6.6866	8.03268	1.38366	0.511637	5.34412	7.03781	7.7314	7.90801	1.48095	2.05603	3.07797	2.06318	5.16161	5.5788	8.45259	1.94808	2.11805	2.82872	3.33512	3.29623	3.96975
RCV	RCV	4.2404	4.50922	5.24265	3.80613	3.11441	1.8438	3.79494	4.4851	3.28435	7.03026	3.35407	3.96264	4.31747	3.15558	5.56022	7.19944	3.63981	3.13198	5.80463	6.58492	7.31938	8.17582	9.74127	9.7331	1.70021	7.40421	2.22367	6.16092	7.64336	0.822428	0.44871	5.33917	6.25056	7.39772	7.42534	1.40095	1.98811	2.34086	2.50777	4.28483	6.25216	7.74635	2.58491	1.77286	2.59574	2.80331	3.57052	3.09516
RCV	RCV	5.30408	3.66339	5.53713	4.47924	2.15437	2.84499	2.77038	5.20891	3.84345	5.19199	3.51638	3.4016	3.58322	3.37081	6.01323	5.93526	3.95811	3.67257	6.51822	6.5699	8.14371	8.42948	10.0587	10.5371	2.13454	7.04257	2.26788	5.62149	7.21202	1.35646	1.2485	5.29816	5.17207	6.51914	6.48213	2.3765	2.19883	2.22803	3.489	3.18304	7.57746	7.46648	2.41417	2.39517	1.95818	2.77964	4.17202	3.29054
RCV	RCV	4.55935	4.22795	5.44899	4.05834	2.49913	2.8539	3.26054	4.64047	3.5197	6.3294	3.52018	3.42472	3.99436	3.19649	6.16475	6.81781	4.25815	3.81437	5.89582	6.37082	7.9974	8.71024	9.96189	10.7699	1.96737	7.42144	2.97667	5.59581	7.22445	1.59699	0.948541	5.01358	5.44857	6.96076	7.0903	1.91401	2.20636	2.61947	2.91994	3.84858	6.35529	7.16181	2.14881	2.17116	2.46175	2.40929	4.18663	3.22342
RCV	RCV	5.80119	4.56648	5.95112	5.17483	3.08024	2.83063	3.47113	6.09769	5.4296	5.62557	3.23291	4.44642	4.26249	5.29778	6.48017	6.56214	4.15504	5.16258	6.97035	7.8719	9.30379	9.25229	11.8769	11.8525	2.45332	7.0916	1.74881	5.69086	7.38669	1.15622	2.21057	5.63412	6.64173	7.81899	8.00412	2.1328	2.76159	2.33249	3.24104	3.26693	7.29207	9.15753	2.35598	2.34382	2.03201	3.87077	3.83424	3.79783
RCV	RCV	5.06849	4.79119	5.44913	4.39761	3.16246	2.54228	3.18015	5.26764	5.42885	5.21383	3.08753	4.02564	4.60234	5.51409	5.98973	5.87162	4.55309	5.35528	6.9467	7.10281	8.45744	8.63065	10.7083	11.2179	1.78385	7.44968	2.1957	5.59547	6.8823	1.39617	2.04367	6.10035	6.55299	7.76644	7.65135	2.60833	2.98387	2.48444	3.18077	3.03907	7.90012	8.47985	2.52808	2.75726	1.77983	3.89574	3.53219	4.53467
RCV	RCV	4.62555	3.53782	6.27595	4.04159	2.19082	2.86688	3.51712	4.91598	4.06652	6.36344	3.78643	4.05913	3.07547	3.78165	6.92163	6.96396	3.32186	4.09825	6.195	7.24769	7.90777	8.64818	9.81739	10.4513	2.09413	8.16532	2.20383	6.6802	7.79384	1.05667	1.32528	5.21617	6.36639	7.39242	7.65776	2.40503	1.72721	2.42976	3.61286	4.02775	6.94499	8.815	3.05545	1.66574	2.22275	3.7784	4.6021	3.2717
RCV	RCV	4.37065	4.13662	6.11746	3.80907	2.78535	2.80203	3.34918	4.44039	4.51785	5.89987	3.56698	3.98711	3.68375	4.14806	6.69001	6.55344	3.57363	4.74609	6.11572	6.77476	8.4914	8.83334	10.3426	10.1212	2.44134	7.26663	1.79628	6.04146	7.34196	0.919392	1.30951	5.64698	6.14317	7.21537	7.29169	1.9575	2.8002	2.75392	3.5431	3.53975	6.92975	7.88632	2.50915	2.35561	1.91932	3.61065	4.05795	3.94296
RCV	RCV	3.62312	4.42979	5.20386	3.13438	2.48849	2.68869	3.15692	3.53728	3.4553	5.9501	3.29727	2.95315	4.36665	3.05218	5.6687	6.64218	4.29033	3.86959	5.94459	5.19674	7.16436	7.46716	8.94427	9.59993	1.55781	7.18799	2.94102	5.42624	6.77676	1.42266	1.24177	5.53584	4.92626	7.22899	7.11245	2.44103	2.38729	2.18189	2.99064	3.42981	6.86977	5.78612	2.74682	2.25008	2.33316	1.8724	3.67853	3.61121
RCV	RCV	3.8929	4.46006	5.3046	3.4359	1.83605	3.50343	3.27886	3.86482	3.59211	6.1021	3.83195	2.91327	4.02517	3.07842	6.92769	6.9575	4.23866	3.93527	5.88476	5.46896	7.39472	7.57943	9.2957	9.83841	1.49488	6.86974	2.73854	5.34193	6.45414	2.65778	1.40801	5.04279	4.70893	7.1844	7.41428	1.8467	1.9342	2.30234	2.90624	3.48398	6.60871	6.02559	2.92134	1.80761	2.18875	2.11933	4.13752	2.98932
RCV	RCV	3.98393	5.08032	4.30583	3.61496	3.17795	1.97254	3.36637	4.35857	3.5769	6.69191	3.88835	4.77441	4.55107	3.58531	5.27084	6.76081	3.62143	3.74863	5.24294	6.90773	7.43817	8.51837	9.47203	9.64054	1.18589	7.22212	2.11195	5.78766	6.78011	1.63208	0.601728	5.01593	6.6163	6.4322	6.71974	1.11107	2.19952	2.4384	1.84988	4.36579	5.47272	8.32188	2.51741	1.3257	1.64759	4.19587	3.69096	2.07008
RCV	RCV	4.66007	4.11654	5.42868	4.00443	2.27679	2.61561	3.30988	4.74322	4.08955	5.62598	4.00694	4.09143	3.93457	3.53942	6.18309	6.39758	3.80657	3.554	6.20261	6.68572	7.85399	8.06072	9.53917	9.77624	1.65051	6.60563	1.67711	5.79357	7.0041	1.71601	1.21441	5.32349	5.74891	6.72741	6.93677	1.95302	1.92935	2.02427	3.05449	3.37763	7.12092	7.89666	3.15731	1.63162	2.01246	3.29503	4.23569	2.57194
RCV	RCV	4.243	4.82505	4.84925	3.77549	3.3607	2.04321	3.20444	4.54342	5.13987	5.21942	3.20451	4.23276	4.3428	5.31054	5.68308	5.27476	3.84201	4.98593	5.94897	6.73949	6.93968	8.1542	9.68978	10.3306	1.33454	7.16608	2.2767	5.11804	5.99151	1.47104	1.0894	5.61078	6.60598	7.52802	7.47299	1.40388	1.9966	2.10683	2.51861	3.07366	6.53466	8.11109	2.73724	1.80529	2.1679	3.47153	3.23789	3.2059
RCV	RCV	4.31931	4.7528	5.29815	3.8373	3.30587	2.19027	3.43317	4.45537	4.09091	6.27662	3.59423	3.77309	4.49483	3.71074	5.67909	6.7273	4.08325	3.47492	5.85116	6.68024	7.29204	8.51386	9.91037	10.2361	1.67405	6.58483	2.1341	5.66702	6.98687	0.848477	0.718936	5.60666	6.29507	7.44902	7.59844	1.7165	2.04971	2.50949	2.69923	3.79651	6.40128	7.7332	2.66916	1.81161	1.67649	3.73401	3.92197	3.23619
RCV	RCV	4.92785	4.53904	5.25253	4.16133	2.70715	2.22502	3.33635	4.98297	3.59901	6.30209	3.66255	3.78512	4.40985	3.40221	5.74403	6.57207	3.84965	3.39455	6.66142	6.88846	7.90141	8.3662	10.3669	9.77822	2.0546	7.30877	1.81013	6.33443	8.03579	1.37305	0.621624	5.8851	6.0994	7.08937	7.11913	2.5321	2.33476	2.42363	3.00979	3.97617	7.84127	8.23056	3.07069	2.14571	1.77579	3.69936	3.62707	3.81034
RCV	RCV	4.61059	4.29657	4.86271	4.07705	2.49686	2.35999	3.2425	4.95144	3.23534	6.60106	3.8059	3.91913	3.86966	3.10885	5.69675	6.76915	3.24279	3.41743	5.87227	6.95332	7.55499	8.43433	9.47351	10.3111	1.36122	7.56885	2.58429	6.1228	7.17116	1.51012	0.447982	4.93241	6.13614	6.51743	6.96131	1.25345	1.82459	2.41303	2.49265	4.35219	6.37933	8.44239	2.52545	1.71802	2.08944	3.53109	3.74887	2.77512
RCV	RCV	5.63062	4.92536	4.90985	4.55059	2.61317	2.57696	2.75855	5.61199	3.67687	6.1258	4.72542	4.30697	4.51202	3.49691	5.75765	6.3242	4.11743	3.44416	7.46455	7.22565	8.68002	8.80297	10.9566	10.1006	1.93384	7.1478	1.81574	6.55374	7.90398	1.60678	0.34605	6.40332	6.25605	6.73928	6.78744	2.79634	1.88385	2.08291	3.15991	4.18761	9.23357	8.89746	3.95515	1.91684	2.03994	3.62225	4.82021	2.91027
RCV	RCV	6.16333	5.15632	5.30475	5.20787	3.19467	2.48299	3.1617	5.96298	4.77293	5.34808	3.31377	3.65569	5.00025	4.6207	5.9001	5.87313	4.53393	4.7467	7.54686	7.26339	9.09	8.90996	11.7927	11.4917	2.04478	6.93834	1.94065	5.44581	7.04464	1.57615	1.42225	6.39658	5.9197	7.71858	7.53131	1.86061	3.06799	2.22899	3.10248	3.03668	8.75873	7.9681	2.35944	3.15238	2.18308	2.83122	3.34089	4.28524
RCV	RCV	5.74823	5.18924	6.21433	4.61254	3.14186	4.00869	2	5.23007	5.57179	4.80383	4.42724	3.35435	4.97079	4.50124	6.67659	6.24881	4.67835	4.84407	8.30904	6.6465	9.54523	8.17939	12.7421	12.3418	3.23348	7.52514	2.58592	6.02017	8.10474	1.22563	1.89307	7.53762	5.77467	8.25131	8.15083	2.66094	2.95449	2.06341	4.77357	3.17201	10.3417	7.25121	3.50159	3.37865	2.72201	2.09969	4.7331	4.3342
RCV	RCV	5.20548	4.15469	6.79477	4.11623	3.03833	2.75827	2.86168	4.6251	4.98793	4.74075	4.43145	3.32701	4.0899	4.12651	6.86924	5.87017	3.65939	3.49163	7.84324	6.07117	9.27702	7.39642	10.8543	10.5708	2.38533	7.48267	1.74939	6.42565	7.71822	0.233606	1.52265	7.34858	5.38664	7.57386	7.24977	2.29353	2.94767	2.18105	4.85364	2.55769	9.8628	6.57183	3.79578	2.8906	2.01933	2.43938	4.81392	4.04224
RCV	RCV	3.35729	6.26214	6.60474	3.05926	4.07693	3.64297	4.00476	3.28529	4.51647	8.07449	3.64742	3.6046	5.71241	3.83115	7.23445	8.88908	4.63908	3.60729	5.99662	5.63682	8.08056	7.95542	11.4319	11.6804	2.32093	7.54412	3.78922	5.86065	7.58112	0.928582	1.13493	6.62875	6.19551	9.8412	9.72914	2.72997	3.13362	2.80328	3.35396	4.60944	6.54084	5.93242	2.91361	2.2739	2.29467	2.41029	3.8144	4.06467
RCV	RCV	3.91561	4.64914	5.45401	3.27386	3.4603	2.64497	2.34203	3.57234	4.39793	4.81951	3.97968	2.63656	4.62436	3.96928	5.48396	5.3592	3.5552	3.71311	6.40079	4.96348	7.76529	6.80909	10.4203	10.1229	2.86766	6.74237	2.63869	4.92265	7.24842	0.163417	0.863546	6.51864	5.07065	6.95567	7.05568	2.32455	2.64238	2.24001	3.7177	2.83847	7.6482	5.16023	3.58669	1.92779	1.92779	1.7958	3.88548	3.55845
RCV	RCV	3.6896	4.89321	6.39698	3.37161	3.16522	4.12924	3.02267	3.76957	4.44396	7.09091	3.33243	3.57358	4.10741	3.85042	7.37303	7.78256	3.84791	3.84422	5.71872	6.13446	7.52079	8.11443	11.7008	11.1575	3.43769	7.3113	3.17158	5.79055	8.02518	1.3482	0.967949	5.58624	6.0372	8.94746	8.94873	1.55898	2.23696	2.49729	3.84159	4.58574	6.11759	6.81064	2.80026	1.81518	1.76959	3.37581	3.94708	3.57454
RCV	RCV	3.88094	4.53647	6.73076	3.29515	2.89774	3.26737	3.40144	3.53997	3.9135	6.36384	4.19052	2.94743	4.24307	3.35273	7.11469	7.07301	3.45162	3.35554	6.77271	5.02304	7.65395	6.89096	10.6654	10.1916	2.70636	7.66886	2.8995	5.88518	7.71024	0.775495	1.05139	6.60384	4.75823	8.4562	8.29794	2.72478	2.37609	1.77729	4.23431	3.43713	7.96737	5.08482	3.57859	2.34756	1.72852	2.05625	4.11021	3.11798
RCV	RCV	4.08593	4.65001	6.72558	3.49736	3.68408	2.54486	3.50802	3.79939	4.87685	5.70101	3.96251	4.15856	4.60756	4.37619	6.7784	6.34388	2.95942	3.53172	6.80897	5.44472	8.96993	7.8111	10.5934	10.7229	2.513	7.52418	2.5029	5.72783	7.64692	0.243308	1.03597	6.92499	5.55035	7.57822	7.20688	2.13651	4.17027	2.73673	4.13244	2.83482	7.95483	5.65755	3.45965	2.39802	2.13707	2.02843	3.06945	3.9814
RCV	RCV	4.55894	4.05319	6.94189	3.92072	3.39868	3.14215	2.91502	4.3761	5.2991	5.25503	3.66191	3.13765	3.84359	4.66533	7.18576	6.11904	3.833	4.20008	6.72002	6.23088	8.75976	7.71882	11.3451	11.2308	3.21084	7.68092	2.25733	6.0117	7.63752	0.474402	1.33781	6.50104	5.84771	8.20991	8.09164	2.35966	2.70412	2.6546	4.6528	2.9705	7.78467	6.78722	2.96056	2.54456	1.99537	2.80819	4.57532	4.30499
RCV	RCV	7.40283	4.94588	5.32256	6.41331	3.41481	2.73053	2.75055	7.55627	4.74666	5.73462	3.70162	4.37316	4.82002	4.49743	5.45896	6.38477	4.19986	3.9356	8.08468	8.61361	9.96517	10.4272	13.3038	13.1766	2.42237	7.38349	2.39026	5.69818	7.30803	0.266833	1.51916	6.10107	6.57422	7.3956	7.31929	1.29516	2.46016	2.3969	3.21497	3.72918	8.62182	9.74753	2.60646	2.40351	2.48154	3.18809	4.13745	3.39254
RCV	RCV	6.08969	5.43038	4.79782	5.29922	3.76804	2.25273	2.87977	6.26084	4.32663	6.18904	2.82434	3.30654	5.24308	4.15237	5.04921	6.47335	4.59412	3.8687	7.2504	7.77655	8.66984	9.298	12.2233	11.9395	2.13607	7.28916	2.46846	5.75914	7.52615	0.6136	0.782074	6.26624	6.77726	7.90497	7.89402	1.10434	2.92945	3.05976	2.67941	4.06811	7.94911	9.02588	2.50353	2.47908	3.00053	2.6646	2.9732	5.24191
RCV	RCV	6.09842	5.35233	4.96865	5.18099	3.48455	2.74501	2.53875	6.04771	4.239	5.99616	3.67927	3.5605	4.84762	4.17421	5.64496	6.08112	4.04403	3.66228	7.40628	7.50699	9.21813	9.36976	12.4454	11.8657	2.44933	7.67488	2.67253	5.78775	7.46432	1.11541	0.325091	6.41595	6.37474	7.23013	7.24147	2.09676	2.92169	3.02122	3.09144	4.06097	8.51014	8.55296	3.18922	2.16045	2.69558	2.68507	3.58768	4.56535
RCV	RCV	6.63339	6.11392	4.69293	5.62144	4.41385	2.09635	2.64804	6.54773	4.83092	5.8364	4.05676	3.37112	5.94708	4.79851	4.91931	5.8782	5.15883	3.98276	7.97445	7.90035	9.71345	9.62312	13.2043	12.592	2.33969	7.55744	2.68006	5.58084	7.51888	0.59764	0.225991	7.21806	7.04898	7.67328	7.7887	1.23775	2.70329	3.2528	2.81093	3.82443	9.17783	8.90875	3.39794	2.29149	2.78901	2.73268	4.27279	4.7286
RCV	RCV	5.91502	4.61876	4.99666	5.14005	3.224	2.74312	2.3885	5.98102	3.95927	5.76343	2.88634	3.1629	4.3154	3.7195	5.35398	6.05352	3.81913	3.33832	7.02496	7.12978	8.41885	9.04671	11.6526	11.9329	2.20035	7.1554	2.94697	5.45389	6.91516	0.606783	0.551852	5.75712	5.9156	7.22062	7.15908	1.42803	2.76642	2.68448	3.15539	3.90254	7.71559	7.99925	2.13151	2.66563	2.91351	2.04039	3.06403	4.51156
RCV	RCV	7.74593	4.14895	6.3492	6.015	2.42143	2.85145	2.87932	6.95481	3.65845	5.76748	5.00947	3.46504	3.79306	3.33915	6.7795	6.26365	3.60141	3.59003	8.78791	7.78405	10.1886	9.65526	12.2026	12.0628	2.22616	8.47105	2.43735	6.89754	7.85902	0.723377	0.974567	6.96575	5.39174	6.9782	6.93008	1.72284	2.20161	2.18953	4.45847	3.61676	11.2887	8.43399	3.97133	2.53415	2.07554	2.77799	5.39683	3.37293
RCV	RCV	5.44047	5.05943	4.53732	4.6034	4.00404	1.95143	2.16471	5.48581	5.37833	4.29839	3.87308	4.19863	5.07604	5.18626	4.52256	4.67563	4.21528	3.85175	6.77712	7.09985	9.10909	8.63357	11.621	11.0011	2.82317	6.0531	1.6937	4.76252	7.05925	0.0954597	0.990087	6.46006	6.65011	6.22604	6.11256	1.91668	2.86594	2.89289	2.92187	2.76777	7.87402	8.38969	2.6794	2.34808	2.40836	2.94718	4.21887	3.65016
RCV	RCV	5.82224	3.85982	4.84325	4.88955	2.81119	2.51547	1.98223	6.26953	4.67522	4.69645	3.23545	3.93355	3.61882	4.64348	5.17854	4.90267	3.37311	4.68992	6.71629	7.72975	8.34703	9.27726	10.819	11.3438	2.37198	7.57333	2.4427	5.58413	7.01216	0.698049	0.916139	5.46008	6.54519	6.08737	6.23288	1.29435	2.34749	2.73541	3.34063	3.40322	7.76589	9.91145	2.70288	1.95031	2.57875	3.36003	3.57916	4.09047
RCV	RCV	6.93258	4.51752	5.42398	5.72927	2.84822	2.85597	2.51172	6.74616	3.6846	5.98958	3.88057	3.31009	4.34968	3.29937	5.60784	6.55033	3.87435	3.45194	7.69597	7.99329	9.43775	9.45659	12.6008	11.7491	2.81536	7.37695	2.18983	6.25359	8.00497	0.331219	1.00621	6.12759	6.00978	7.03072	7.23507	2.17094	2.28358	2.65911	3.56739	4.14563	9.04991	9.14395	2.8392	2.50566	2.52575	2.89053	4.35107	4.08062
RCV	RCV	6.48758	4.63624	4.44548	5.6061	2.80288	2.74027	2.30463	6.6977	4.33321	5.04264	2.48283	3.76319	4.29304	4.02541	5.17541	5.56844	4.20601	4.01881	7.14387	7.69667	8.43639	9.13399	11.7722	11.7243	2.09602	6.31378	2.11305	5.01158	6.59013	1.44395	1.09309	5.31647	5.89359	7.0132	6.79265	0.645381	2.67706	2.0735	2.69437	3.37968	7.69386	8.93917	1.85701	2.63099	2.44784	2.7676	2.77071	4.0172
RCV	RCV	6.51248	5.33185	5.67445	5.06143	3.07556	2.68811	2.79031	5.72946	5.26932	4.41365	4.96572	3.86024	5.01227	5.00652	6.57766	5.38332	4.86814	4.93959	8.68059	6.71439	9.69959	8.19133	11.844	11.1936	1.9451	6.85025	1.48637	5.66268	6.7422	1.91221	1.98462	7.62482	5.44022	7.56081	7.33963	2.62566	2.56675	1.50669	3.94469	2.32423	11.1508	7.09746	4.23709	2.76925	1.70272	2.75854	5.14369	3.02638
RCV	RCV	5.63896	5.24829	5.07647	4.65084	2.93167	3.41001	2.17385	5.68666	5.2511	5.16101	4.851	3.78774	4.78129	5.12377	5.84791	5.96718	4.5952	4.7024	7.31233	7.74174	8.72707	8.80078	12.0963	11.482	2.77596	7.37402	2.10645	5.84185	7.58904	1.40747	1.96714	6.45974	6.74633	7.29514	7.60951	2.4529	1.67748	2.87788	3.47999	3.63417	8.83253	9.46245	3.79598	1.93323	2.54838	3.57187	5.30272	3.60739
RCV	RCV	5.84992	4.32426	5.3635	5.00949	2.38982	2.40505	3.5011	5.97267	4.5554	5.33564	3.8132	3.55069	3.56613	3.94241	6.33777	6.33898	3.97415	3.97594	7.33431	7.10461	8.95746	8.21419	10.7131	9.92918	1.46247	6.0466	0.747006	5.68155	6.23123	1.33298	1.60772	5.68936	5.75413	7.27526	7.48344	0.736387	1.96153	2.0935	3.06567	2.97917	8.38251	8.29468	3.28549	1.94143	2.55643	2.6157	4.78447	3.38163
RCV	RCV	5.00588	4.13735	6.01346	4.35616	2.4624	3.17822	3.1927	5.08617	4.33886	5.97476	3.47014	3.85227	3.62221	3.60082	6.74146	6.96566	3.60872	3.44378	6.69351	6.81681	7.87682	8.10062	10.9431	10.5275	2.43556	6.94586	1.91508	6.0483	7.44627	1.19025	1.41413	5.6097	5.83059	7.85728	7.83987	1.35585	2.13694	1.9817	3.61351	3.61889	7.54855	7.86901	2.70268	2.35341	2.36602	2.90405	3.95603	3.38806
RCV	RCV	6.2926	5.01947	4.7779	5.29463	2.9949	2.38133	2.86734	6.58684	4.56491	5.69058	3.86525	4.26948	4.82862	4.44285	5.48397	5.93245	4.28595	4.44759	7.54568	8.01651	8.75401	9.59706	11.3412	11.5933	1.5918	7.41626	2.14063	5.99306	7.22993	1.67199	0.800801	6.11061	6.76796	6.91789	7.09226	1.48253	2.37984	2.51362	2.84355	3.77581	8.77704	9.93779	3.88445	1.46165	3.18485	2.86683	3.74059	3.84681
RCV	RCV	6.13073	4.851	5.35228	4.91218	2.76843	2.61924	2.7876	5.79685	4.25072	5.39689	4.50672	3.43815	4.44995	3.90474	6.10975	5.82167	4.47822	3.68429	7.80862	7.12263	8.70394	8.99004	10.9858	11.0105	1.65163	7.09352	2.02514	6.07484	7.08044	1.47346	0.72196	6.69027	5.83564	7.10602	7.02728	2.22186	2.19305	2.48141	3.53	3.3828	9.73833	8.23577	4.1404	1.94326	2.44518	2.70374	4.83193	3.79198
RCV	RCV	5.54765	4.71077	5.38922	4.64901	2.39052	2.8236	3.24982	5.57504	4.63604	5.51381	4.35339	3.82657	4.59384	4.02727	6.28178	6.51064	3.93054	3.96777	7.12677	7.36475	8.27657	8.97639	10.0689	11.0807	1.09431	7.0421	2.00583	5.98484	6.76268	2.06836	1.61549	5.96096	6.13779	6.94032	7.1023	1.72802	2.20985	2.81873	3.17698	3.35351	8.42908	8.78929	3.67348	1.76758	2.60442	3.06899	3.95276	3.67378
RCV	RCV	6.18083	5.62506	4.85492	4.98559	3.21656	2.80409	2.43273	5.76774	4.34502	5.43454	4.24559	3.37669	5.31726	4.18909	5.59124	5.69203	5.18354	4.33445	7.55464	7.38547	8.50799	8.62068	11.8288	11.8048	2.14036	7.48665	2.63352	5.66643	7.28336	1.60257	0.730355	6.80577	6.05584	7.92238	7.84185	1.79407	1.87627	2.12061	3.14941	3.62639	9.33774	8.35887	3.95826	1.91666	2.2959	2.96213	4.5986	3.67441
RCV	RCV	5.84992	4.91567	5.70391	4.92522	2.18663	3.54104	3.21326	5.89125	3.9363	6.7583	4.75015	3.29322	4.20134	3.48922	7.06514	7.47348	4.16301	3.17377	7.66914	7.54882	8.9639	8.80619	11.3227	11.7567	1.71008	8.23992	2.80744	6.83965	7.89401	2.13255	1.28391	6.20127	6.19547	7.55431	7.98829	2.24588	1.98316	3.22684	3.49457	4.40899	9.03582	8.9539	4.4609	1.36787	1.86956	3.90399	5.01865	4.16367
RCV	RCV	5.60527	5.57415	5.17472	4.63247	3.02356	2.79913	3.06071	5.41474	4.8038	5.57972	5.10824	3.53036	5.03403	4.38327	6.13043	6.32485	4.49255	4.39427	7.59752	7.11938	8.54834	8.65301	11.5021	10.7346	1.85346	6.70957	1.5627	5.82364	7.01892	1.68657	1.42398	6.75344	6.17938	7.66651	7.82885	1.3433	1.69578	2.52037	3.15075	3.36441	9.17769	8.20963	4.4692	1.56622	2.39298	3.00437	5.09127	3.22346
RCV	RCV	6.19441	5.14044	6.14696	5.09173	2.90389	2.71602	3.6582	5.9268	5.37909	5.42066	4.18916	3.56349	4.50916	4.91104	7.31264	6.31363	4.27237	4.61328	8.03764	7.67183	8.85954	8.80349	11.1227	11.6091	1.24889	7.31007	1.5069	6.28911	6.85767	1.95649	1.67379	6.97007	6.32769	8.61683	8.51558	1.23564	2.43365	2.47677	3.7193	2.99971	9.74814	8.77332	3.77618	2.52054	2.41421	3.25627	4.30103	4.47651
RCV	RCV	6.00344	4.87027	5.88368	5.02128	2.32861	3.12939	3.53661	5.97588	4.76041	5.94415	4.96079	3.75966	4.77168	4.1203	6.97712	6.97528	4.56069	4.06475	7.74879	7.669	8.74076	8.74261	11.4436	11.117	1.89134	7.22208	1.54551	6.44821	7.81298	2.41839	1.66361	6.34096	6.25037	7.87653	8.23708	2.06302	1.61127	2.43174	3.51128	3.53563	9.19234	9.03662	4.12014	1.77905	2.37805	3.42139	5.03995	3.27734
RCV	RCV	6.05448	4.59546	6.19693	4.9043	2.8945	2.62493	3.22273	5.75799	5.7591	4.50479	4.05171	4.50514	4.91213	5.78095	6.40616	5.83088	4.73047	5.67134	7.9137	7.36628	8.92113	8.38453	11.0583	11.3905	2.00425	7.35853	1.4517	6.11025	7.63012	1.68865	2.79305	6.91348	6.15242	8.07843	7.82031	2.17182	2.55286	1.44417	4.02909	2.46617	9.76152	8.51382	3.46769	2.78593	1.72654	3.72923	4.2884	3.39312
RCV	RCV	5.55178	3.17605	7.43699	4.68411	2.63208	2.88563	3.43665	5.10682	4.67877	5.08365	3.81823	3.76437	3.00061	3.91289	7.62503	6.34865	2.63875	3.85681	7.41372	6.05674	9.03734	7.77831	11.154	10.694	2.7835	7.45074	1.57682	6.22955	7.00414	0.297006	1.87202	6.29654	4.67713	7.65246	7.37481	1.70204	2.80952	1.65654	4.90832	2.35687	8.72674	5.87418	3.23509	2.495	1.94767	1.90932	4.1695	2.72871
RCV	RCV	4.07808	4.68937	6.52212	3.78694	3.69669	2.95487	3.75952	4.30925	5.97648	5.87056	3.6916	4.74747	4.24606	5.32835	7.10612	6.84725	4.17142	4.57093	5.72611	6.69438	7.98823	10.1249	11.0335	11.2159	2.61167	6.63916	1.83855	5.29921	6.88293	1.01222	1.62341	5.61354	6.7025	8.02054	7.6069	1.23229	2.97246	3.64663	3.36284	3.10024	5.80884	7.57713	2.0989	2.16064	2.90156	2.65459	4.1966	3.55771
RCV	RCV	4.92157	4.18993	7.24302	4.23855	2.24454	4.04935	3.55239	4.55945	4.13589	6.45585	4.22556	2.84177	3.60297	3.10843	8.04028	7.87844	3.96466	3.4259	7.35284	5.63218	9.09672	7.48475	11.5806	11.0852	2.83046	7.64768	2.73279	6.06736	7.57278	1.25204	1.8509	6.32943	4.41305	8.60818	8.52533	2.38799	2.44188	1.95908	4.59735	3.38095	8.51052	5.39068	3.06575	2.88372	1.86091	1.90897	5.14791	3.29725
RCV	RCV	4.76126	4.51689	6.30495	4.12588	3.70234	3.02483	2.65052	4.59489	4.59764	5.84607	4.78512	4.63537	4.21378	4.52636	6.66655	5.9207	3.42788	2.802	6.8709	6.10827	9.54898	9.04004	11.7313	11.7853	3.07742	8.1301	3.2834	5.72431	7.60239	0.644949	0.15014	6.58066	5.87226	6.53186	6.32523	1.94774	3.57176	3.37251	4.23452	3.64449	7.87073	6.52692	3.10962	2.35759	1.97285	2.56191	4.51171	2.95751
RCV	RCV	3.82035	5.27334	6.11887	3.53808	3.88949	2.05276	4.60823	3.92864	4.25332	7.46179	3.97389	4.26104	4.95692	4.20572	6.50288	7.67489	3.37754	5.61045	5.45319	6.32486	7.82372	8.83219	10.3528	10.5173	1.78225	7.76325	2.68195	5.65231	7.08807	0.710557	0.95638	5.74515	6.46485	8.26273	8.68889	1.73828	2.56056	2.42179	2.49582	3.91196	5.59148	6.95092	2.52589	1.66316	2.11077	3.09455	3.76016	2.44591
RCV	RCV	4.18718	5.57708	5.50864	3.80908	3.17189	2.69429	4.2185	4.22966	3.97506	7.22312	3.71512	3.66151	4.5429	3.78807	7.05558	7.44664	4.29483	3.73472	5.98714	6.16893	7.62716	8.50373	10.2234	10.503	1.06756	7.01307	2.54703	5.62941	6.39039	2.13949	0.477104	5.59689	5.80378	8.5736	8.60815	1.53647	2.041	2.26236	2.4255	3.88044	6.35797	6.69122	2.63075	1.98706	2.85512	2.00221	4.09358	2.83858
RCV	RCV	4.14885	4.50953	6.91933	3.77023	3.03064	3.01792	4.33732	4.22444	4.13828	7.4988	4.13078	4.2481	3.84692	3.98249	7.89597	7.67446	3.61881	3.11833	6.16565	6.37593	8.008	9.42373	10.6935	10.9547	2.30023	8.15577	2.84958	6.28427	7.81402	1.53521	0.364129	5.69928	6.01327	8.11173	7.93909	2.18276	2.81968	3.28788	3.51266	4.09491	6.61047	7.04764	2.06757	2.78233	2.18075	2.99104	4.23403	3.38408
RCV	RCV	4.62751	4.17822	6.79805	4.06767	3.13889	2.26636	4.24309	4.64775	4.20855	6.81573	4.56479	3.92183	3.78747	4.11704	7.29447	6.94354	3.31617	3.27364	6.5481	6.78945	9.0273	8.84033	10.8024	10.1922	2.46394	7.97693	1.84536	6.53916	8.02679	0.857481	0.447568	6.0613	6.23073	7.27506	7.62268	2.0213	2.85394	3.2613	3.64758	3.74821	7.33808	7.68483	3.14886	2.01416	2.6948	2.71283	4.70892	3.61937
RCV	RCV	4.64852	4.93895	6.59066	4.12331	2.66815	3.1947	4.3641	4.65597	3.86746	7.68063	4.1166	3.84689	3.81858	3.50802	7.95401	8.20027	3.66112	3.57817	6.63657	6.86458	8.83972	9.15685	10.2919	11.7479	1.30627	8.69842	3.36939	6.68012	7.26227	1.69874	1.00026	5.89714	6.04976	8.29198	8.38843	1.31357	2.73715	3.08538	3.35129	4.35229	7.34705	7.65114	2.99644	2.24115	2.49392	2.95883	4.47554	3.95748
RCV	RCV	4.22201	4.12051	6.42363	3.78099	3.31898	2.89607	3.22766	4.45489	4.06219	7.06355	3.95581	3.73332	3.84506	4.03942	6.73181	7.08657	3.25783	3.32841	6.36101	6.6532	7.92971	8.43058	10.5001	11.6187	2.34724	8.71541	3.66538	6.60871	8.01663	0.497699	0.0420604	5.91208	6.59397	7.84483	8.12006	1.18154	2.19017	2.87904	3.894	4.57072	6.99916	7.83459	3.18067	1.81743	2.29718	3.29745	4.31935	3.70638
RCV	RCV	5.51339	5.36695	5.82522	4.84507	4.04995	2.96007	2.82547	5.53776	6.27107	4.97057	3.82551	4.95384	5.19775	5.83658	6.02135	6.02986	3.92271	5.51813	7.20302	7.29618	9.99071	8.9046	11.9759	13.1229	2.12754	7.50338	2.73848	5.24394	6.51083	0.428666	2.04311	6.69948	6.78881	7.64675	7.75899	1.70905	3.66942	2.35313	3.60233	2.85049	7.9611	8.13704	1.99698	3.33806	1.94243	3.5093	3.65522	3.57426
RCV	RCV	4.95153	5.21154	5.56564	4.37678	4.44434	2.51899	2.56288	4.95204	6.11986	4.65843	3.44594	4.4975	5.01601	5.82378	5.78689	5.16344	4.30309	5.36182	6.66695	6.68478	9.20496	8.79767	11.4942	12.5299	2.21961	7.23183	2.78138	4.84873	6.07582	0.426421	1.13489	6.71655	6.72415	7.71363	7.50436	2.82335	3.226	2.35522	3.50967	2.67838	7.3446	7.36931	2.03353	2.99991	2.06855	2.98134	3.88019	3.44263
RCV	RCV	4.03982	4.54669	5.21873	3.72112	2.72077	3.04745	3.2268	4.30407	3.64329	6.76089	3.11868	3.40015	3.70727	3.42621	6.41652	7.00173	3.72129	3.55867	5.00038	6.81615	7.50945	8.54297	9.80321	10.7087	1.80307	6.79699	2.83075	5.54202	6.80195	1.66916	0.40431	4.4977	6.11086	7.20385	7.72203	1.20024	2.16756	3.02879	2.48552	4.3897	4.92189	7.87983	1.70394	1.77982	2.29235	3.28162	3.64148	3.60535
RCV	RCV	4.77936	4.87444	5.93347	4.10491	3.46411	2.76294	3.0557	4.71092	5.36073	5.29243	5.02543	4.21327	4.71794	4.77929	6.22855	6.16667	4.68109	4.29007	7.08942	6.45876	10.2205	9.03126	11.395	10.9412	2.63079	6.92221	1.90725	5.65916	7.59367	0.891268	1.4533	6.62154	6.18493	6.48604	6.81116	2.76246	3.39464	3.38351	3.7075	2.98082	8.22956	7.29964	3.4929	2.21601	2.05446	3.0071	5.59436	3.56211
RCV	RCV	4.09343	5.58518	6.21493	3.60768	4.16145	2.95344	3.28497	4.00808	5.39967	6.15441	4.34923	3.83859	5.16569	5.00799	6.69691	6.66053	3.59162	3.99992	6.56153	6.27105	9.8968	8.59394	11.45	11.5	2.47113	7.45089	2.67341	5.61868	7.04198	0.755182	0.927218	6.92364	6.56429	7.47086	7.90703	1.47782	4.84223	3.89997	3.64699	3.52055	7.41504	6.87586	3.65443	1.85084	2.41374	2.69248	3.01953	5.81278
RCV	RCV	4.32001	4.41016	6.16217	4.1065	2.86946	2.51506	4.66529	4.87064	4.08131	7.83856	2.93	4.41997	3.78601	3.96217	7.25769	8.00935	3.88978	3.02963	5.36438	7.47296	7.22182	9.52483	10.3188	10.4716	1.923	7.44401	1.94704	6.1762	7.69545	1.77511	0.544567	4.42565	6.94636	8.25491	8.29493	0.916811	2.17781	3.25218	2.30236	4.5922	4.79409	8.86329	1.74557	1.65863	2.51689	3.77536	3.42045	3.58395
RCV	RCV	4.84962	4.03711	6.64935	4.44335	3.00883	3.38861	3.39378	4.94815	4.41829	6.48529	3.58795	4.12917	3.71011	3.90621	7.02985	7.24121	3.46919	3.54819	6.31848	6.38911	9.3458	8.9464	11.8922	11.4693	3.30639	7.44363	2.72491	5.52719	7.66319	0.624507	1.29193	5.31656	5.581	7.47493	7.41813	2.05361	3.13686	2.89271	3.82802	3.71117	6.43682	6.7698	2.15348	2.27409	2.23077	2.42596	4.06398	3.26728
RCV	RCV	5.28198	4.26637	6.79731	4.68466	3.03646	2.84283	3.93324	5.19297	4.82987	6.04736	4.38948	4.26245	3.98376	3.98156	7.13512	7.19857	3.52528	3.59574	6.90808	6.65532	10.3651	8.97774	11.5296	11.0142	2.54855	6.72478	1.60705	5.77787	7.26056	0.618416	1.61718	5.93116	5.60335	6.9825	7.19627	1.73888	3.72532	3.13063	3.76728	3.02887	7.51692	6.96805	2.89353	2.1951	2.13439	2.58399	4.31253	3.50502
RCV	RCV	4.48168	4.87484	4.27667	4.04198	3.07225	2.08312	3.09827	4.82121	3.99032	5.8545	3.07376	3.33277	4.78505	3.87586	5.17198	6.0292	4.59686	3.71363	5.73194	6.63067	7.84701	7.58795	9.72742	10.1561	1.29102	6.54512	2.24285	5.14773	6.3134	2.02507	0.553216	5.04393	6.14359	6.71113	7.33521	0.970129	2.22947	2.56334	2.02322	3.64485	6.00062	7.88465	2.12541	1.90274	2.16556	3.12718	3.42664	3.69782
RCV	RCV	4.29166	4.96219	5.22828	3.81561	2.88797	2.41362	3.75852	4.52048	4.00244	6.73137	3.91282	4.25649	4.52218	4.16551	6.00434	7.10497	3.98896	4.33826	6.04218	6.88886	8.07045	8.72921	10.0214	10.0982	1.53037	7.74688	2.22131	6.09119	7.28056	1.45041	1.66218	5.49464	6.43106	7.08274	7.29403	0.868315	2.52473	2.87575	2.55889	4.08478	6.64954	8.15966	2.74125	1.93829	2.23041	3.51151	3.99851	3.39833
RCV	RCV	4.51809	6.92138	3.11209	3.96313	3.93969	2.92431	1.93705	4.61092	4.29051	5.94913	4.02109	3.19729	5.93267	4.27064	4.72644	6.14738	5.17199	4.01524	6.09415	6.71824	8.32189	7.93545	11.4428	11.1758	1.38895	7.02666	3.15742	5.12449	6.29802	2.18798	0.95185	6.1689	6.60972	6.82464	7.51926	0.914884	2.47389	3.18085	1.66669	4.4175	6.80017	7.78259	2.74402	1.947	2.72196	2.64481	4.06123	3.96611
RCV	RCV	4.35236	5.29506	4.09524	3.87956	2.85768	3.14006	2.3725	4.61374	3.99199	5.96225	3.81372	3.74726	4.40359	3.8483	5.59822	6.1721	3.96136	3.4044	5.84118	6.5506	7.78783	8.03369	10.5236	10.5425	1.74766	6.84921	2.73912	5.26342	6.56541	2.10822	0.588537	5.16831	6.05537	6.44424	6.91545	1.23517	2.28215	2.68651	2.27136	4.15366	6.34	7.77569	2.51518	1.82243	2.05752	3.25663	3.78795	3.11117
RCV	RCV	4.56221	4.81234	4.28767	4.09905	2.98557	2.10234	3.08828	4.90623	3.99666	5.78956	3.13177	3.38627	4.72688	3.85179	5.18293	6.01746	4.41447	3.71522	5.7301	6.75474	7.63732	7.56038	9.63175	10.2221	1.21212	6.49822	2.20409	5.15869	6.24102	2.02476	0.65286	4.9904	6.14762	6.69448	7.2188	0.93316	2.07978	2.61162	2.03361	3.62848	6.00684	8.06491	2.15207	1.85934	2.26022	3.11545	3.34522	3.58062
RCV	RCV	5.1204	4.37316	4.83045	4.09068	2.18562	2.71927	2.44786	4.83772	3.86363	4.83189	3.95672	3.07728	4.11823	3.57438	5.47588	5.55001	4.62846	3.55974	6.76757	6.29721	8.82652	7.59486	10.3471	9.26907	2.32528	6.40903	1.46627	5.49045	7.1033	1.4229	1.45503	5.89137	5.19091	6.0055	6.29452	2.46042	2.49923	2.38223	3.2024	3.08214	8.47174	7.37101	2.17867	3.26955	2.31387	2.42253	4.77486	3.83893
RCV	RCV	4.19766	5.19173	3.89974	3.72222	3.43605	2.31782	2.30789	4.42701	5.12439	4.46384	3.31704	3.86364	4.34043	5.34396	5.06537	4.47652	4.02734	4.90742	5.48245	6.53441	6.98806	8.23972	9.92808	10.1909	1.46937	6.32605	2.30684	4.23098	5.0528	1.57694	1.06334	5.37551	6.2845	6.54615	6.57876	1.79434	2.04367	2.52258	2.10951	2.84635	5.96689	7.76815	2.09097	1.99121	1.36572	3.95095	3.54662	3.05705
RCV	RCV	4.16755	5.47909	3.79653	3.73771	3.68467	1.7277	2.90657	4.50707	5.31553	4.71575	3.53381	3.68319	5.72212	5.41678	4.61864	4.80311	5.21975	5.21781	5.63564	6.6428	7.54902	7.87286	9.5289	9.97396	0.96724	5.83387	1.79249	4.34454	5.23557	2.28051	0.975408	5.54771	6.67174	6.56701	7.19899	0.72877	2.18076	2.60805	1.77842	2.79449	6.06165	8.0104	2.18449	1.99799	2.53377	2.99377	3.6221	3.33892
RCV	RCV	5.01111	5.03879	3.96934	4.49506	3.28663	2.81723	1.97662	5.40904	5.11976	4.60371	3.14677	3.54582	4.7573	4.81164	4.84863	5.10053	4.75997	4.41629	6.07166	6.95639	8.06856	8.04589	11.0628	11.2953	2.14073	5.81518	2.29276	4.32369	6.08558	1.76691	1.04389	5.19249	6.29662	6.60864	6.99851	1.35374	2.07855	2.53507	2.37545	3.14603	6.2969	8.31804	2.10037	1.95331	2.13316	3.21177	3.75972	3.43495
RCV	RCV	4.19254	4.03051	5.40759	3.60372	2.30251	2.82403	2.98603	4.1472	3.57034	5.76569	3.33821	3.08079	3.69271	3.41591	5.98787	6.31005	3.76175	3.39955	5.95764	5.92261	7.42483	7.53162	9.50626	9.9937	1.98865	7.6966	2.78678	5.62897	7.02755	1.15286	1.35926	5.30943	5.19785	7.00074	6.94461	1.34719	2.1713	2.41614	3.20764	3.51509	6.8869	6.7527	2.4856	2.28386	2.75881	1.91767	3.9062	3.65852
RCV	RCV	4.14074	4.63977	4.9792	3.46054	2.84456	3.08194	2.11237	3.80865	5.02141	3.82611	3.48791	2.57289	4.71913	4.14673	5.15323	5.33188	4.25112	4.00987	6.41552	4.97668	7.75998	6.55009	10.1644	9.93998	2.60611	5.72681	1.8624	4.38684	6.49582	1.11133	2.08771	6.04748	4.62134	6.86591	6.7244	2.51731	2.69141	2.14987	3.43456	2.08464	7.67644	5.16792	3.09815	2.26832	1.82901	1.78589	3.62446	3.75446
RCV	RCV	5.32334	4.85306	4.07004	4.46639	2.74944	2.86609	1.87111	5.55903	3.77699	5.54118	3.91949	3.05763	4.11942	3.72494	5.10921	5.59964	3.87667	3.63847	6.51875	7.20628	8.34504	9.15234	10.7033	10.8111	1.91643	7.10206	2.60805	5.61075	6.77586	1.47835	0.178384	5.54296	6.23015	5.89407	6.61194	1.25372	2.16716	3.3594	2.68587	4.20205	7.6451	8.96536	2.92138	1.86754	2.66481	2.95094	4.17416	4.26519
RCV	RCV	4.97322	4.1482	5.92925	4.1878	2.63852	2.87443	2.97298	4.74598	4.64252	4.97446	4.60339	2.83405	3.91811	4.06083	6.36681	6.02735	3.6596	3.77888	6.96817	6.06876	8.24436	7.69247	10.3838	10.5093	2.06177	6.98918	2.00655	5.57227	6.87379	1.05956	1.7243	6.09801	5.18567	7.01499	7.1939	2.52046	1.9627	2.68579	3.80929	2.70943	8.25228	6.62602	3.51441	2.01139	2.25071	2.18601	4.87308	3.32081
[truncated: 73 more columns]
