# Supplementary material for: Determining the numbers of a landscape architect species (Tapirus terrestris), using footprints
Source: PeerJ. 2018 Mar 29;6:e4591. doi: 10.7717/peerj.4591 (PMC5878928; doi:10.7717/peerj.4591)
Supplement: Supplemental Information 7 — Each column is a metric derived from the footprints, including lengths, angles, and areas, using the FIT Feature Extraction script (Document S1): V1 to V90 are derived values; columns such as ‘42’ would be a linear measurement and ‘42+43’ would be the sum of two linear measurements. A trail is an unbroken series of footprints made by the same animal. Some trails were randomly divided into sub-trails for test analyses. The FIT analysis is based on 95% confidence interval ellipses around a centroid value generated using two canonical variables for each “trail” in a pairwise comparison in the presence of a constant the Centroid Reference Value (RCV) (Jewell et al., 2016, Li et al. 2017). [file peerj-06-4591-s007.xlsx]

## Sheet: Moreira et al_Raw data
Trail ID	Sub-trail ID	Road name	Date	Latitude	Longitude	X1	X2	X3	X4	X5	X6	X7	X8	X9	X10	X11	X12	X13	X14	X15	X16	X17	X18	X19	X20	X21	X22	Y1	Y2	Y3	Y4	Y5	Y6	Y7	Y8	Y9	Y10	Y11	Y12	Y13	Y14	Y15	Y16	Y17	Y18	Y19	Y20	Y21	Y22
2600	1B	Alta Tensao - Estrada da Onca	2014-03-07	-19.1104	-39.9834	0	-6.69345	5.36393	-2.20058	1.10029	-7.74789	5.82238	-2.56735	0.733528	-4.95132	3.48426	-6.1433	4.40117	-1.28367	0	-10.1286	8.11672	0	0	-4.67947	3.63822	0	7.61036	3.07165	2.70489	5.36393	5.27223	2.47566	1.37537	2.88827	2.84242	0	0	-1.0086	-1.28367	-6.37253	-6.37253	7.91845	7.36346	2.86805	0	0.23002	-0.215542	-1.16886
2600	1C	Alta Tensao - Estrada da Onca	2014-03-07	-19.1104	-39.9834	-0.0238206	-5.84506	5.93602	-1.64083	1.22359	-6.26087	7.27583	-1.59463	1.08499	-4.04325	4.78102	-4.73626	5.75122	-1.27123	0.0223798	-8.97279	9.08838	-0.00775615	0	-4.17789	4.5971	0.00311885	7.19381	2.29657	2.38897	5.2072	5.16099	1.41877	1.32637	2.34277	2.52758	-0.105844	0.125157	-0.983651	-0.89125	-6.75869	-6.75869	7.12362	7.26528	2.34236	0	-0.276388	0.317829	-0.941894
2600	1D	Alta Tensao - Estrada da Onca	2014-03-07	-19.1104	-39.9834	0	-6.1675	6.2582	-1.58722	1.99537	-7.30123	6.98379	-1.63257	1.45118	-3.90004	4.48958	-5.48726	5.53261	-1.36048	0	-10.2016	10.3516	0	0	-4.35967	4.33443	0	6.88034	2.16402	2.16402	5.24777	4.97567	0.939588	0.758191	2.07332	2.25472	0.16865	-0.194144	-0.239493	-1.14648	-5.04651	-5.04651	6.88034	6.88034	2.16402	0	0.0504576	-0.0524923	-0.691119
2600	1E	Alta Tensao - Estrada da Onca	2014-03-07	-19.1104	-39.9834	-0.022864	-7.09577	6.63936	-1.52871	1.48298	-7.59772	8.23647	-1.39181	1.16356	-4.49477	5.45294	-5.63556	6.00052	-1.11802	0.0227677	-10.7262	10.0138	-0.00745197	0	-4.74244	5.41728	0.00662757	6.90493	2.2505	2.2505	5.21655	5.07966	0.790282	0.562124	2.20486	2.43302	-0.350509	0.425229	-2.26704	-1.71946	-6.87584	-6.87584	6.90493	6.90493	2.2505	0	-0.766598	0.564872	-2.00152
2613	4A	Alta Tensao - Estrada da Onca	2014-03-07	-19.1109	-39.9861	0	-6.74691	6.65695	-2.51885	2.24897	-8.14127	7.73645	-2.38391	1.66424	-4.363	3.82325	-5.75736	4.85777	-1.21444	0	-11.2579	11.1078	-1.77636e-15	0	-4.3756	4.03675	0	7.82345	2.65082	2.65082	5.5295	5.0797	1.88617	1.3914	2.65082	2.87571	-0.0479451	0.0420137	-2.29691	-2.07202	-5.08564	-5.08564	7.82345	7.82345	2.65082	0	-0.0682755	-0.394276	-2.17494
2613	4B	Alta Tensao - Estrada da Onca	2014-03-07	-19.1109	-39.9861	0	-4.64052	6.50466	-1.15021	1.82448	-5.59242	7.4169	-1.07089	1.78482	-1.82448	4.83883	-2.41942	5.90972	-0.872576	0	-9.2861	13.0164	0	0	-1.85883	4.54657	0	9.24704	3.13901	3.17867	7.22425	7.30358	1.39386	1.55251	3.21833	3.53563	-0.39096	1.03689	-2.2551	-0.073659	-2.92936	-2.92936	9.214	9.29336	3.15552	0	-0.498589	1.33998	-1.62144
2613	4C	Alta Tensao - Estrada da Onca	2014-03-07	-19.1109	-39.9861	0.0229757	-5.26778	6.62616	-2.06872	2.31974	-6.33413	8.06164	-1.86365	1.70453	-3.17608	5.02663	-5.0217	5.43677	-1.28946	-0.0180379	-8.19887	10.3358	0.00828101	0	-3.39721	4.95453	-0.00681683	7.4671	2.70952	2.66851	5.53946	5.17034	1.35607	1.02796	2.62749	2.66851	-0.0794021	0.125666	-2.29414	-2.13008	-5.86232	-5.86232	7.49545	7.43154	2.69133	0	-0.344757	0.522218	-2.21547
2613	4D	Alta Tensao - Estrada da Onca	2014-03-07	-19.1109	-39.9861	0	-6.68202	5.23837	-2.7223	1.56739	-7.79569	6.31079	-2.47482	1.23741	-4.9084	3.62974	-6.43454	4.08346	-1.27866	0	-10.7481	8.42596	0	0	-4.81393	3.59446	0	8.17926	2.61092	2.94089	6.11691	5.62195	1.66224	1.57974	2.73466	3.06463	0.0948482	-0.0701399	-1.43129	-2.50371	-6.05096	-6.05096	7.88174	8.41251	2.79589	0	0.189317	0.119064	-2.08736
2613	4E	Alta Tensao - Estrada da Onca	2014-03-07	-19.1109	-39.9861	0	-5.38271	6.62488	-1.78044	2.07027	-6.00379	7.74282	-1.44919	1.57341	-2.93979	5.2999	-4.14055	6.25223	-1.40779	0	-8.9447	11.0089	0	0	-3.20268	5.03075	0	8.23698	2.64725	2.97849	6.24952	6.16671	0.991026	2.06757	2.85427	3.18552	-0.251138	0.452755	-1.94876	-1.32768	-5.46823	-5.42682	7.99023	8.54068	2.79573	0	-0.622807	0.955945	-1.70132
2613	4F	Alta Tensao - Estrada da Onca	2014-03-07	-19.1109	-39.9861	-0.0447718	-5.9265	6.42123	-2.03131	1.98072	-7.2119	7.82349	-2.07027	1.74701	-3.901	4.43469	-5.0306	5.91486	-1.05752	0.0331318	-9.83675	10.6126	-0.0139079	0	-3.90229	4.66891	0.00836297	8.17085	2.44494	2.6397	5.44423	5.40528	1.35429	1.39324	2.48389	3.02922	-0.437495	0.497348	-1.95662	-1.02177	-6.04656	-6.04656	8.01641	8.33895	2.5382	0	-0.439226	0.256965	-1.52624
2600	1A	Alta Tensao - Estrada da Onca	2014-03-07	-19.1104	-39.9834	0	-6.0417	5.47403	-1.82468	0.892064	-6.81212	6.52828	-2.4329	0.689322	-4.05484	3.93319	-4.90635	4.90635	-1.1759	0	-9.16855	8.30708	0	0	-4.13068	3.9921	0	7.37671	2.59201	2.59201	5.47094	5.22765	1.21336	1.5783	2.63256	2.87585	-0.205829	0.199654	-1.62502	-1.62502	-6.65302	-6.65302	7.37671	7.37671	2.59201	0	-0.332241	0.0891972	-1.62502
7207	3A	Alta Tensao - Estrada da Onca	2014-12-14	-19.1118	-39.9881	0	-6.11381	5.26355	-1.90297	2.26737	-7.00457	6.1543	-1.53858	1.98395	-3.72497	3.23911	-4.81817	3.15813	-1.25515	0	-8.94028	7.69693	0	0	-3.91293	3.2024	0	7.28987	2.79561	2.91708	4.82005	4.41516	1.49997	1.66192	2.79561	2.95757	-0.281539	0.244816	-2.30598	-2.18451	-6.71926	-6.71926	7.19442	7.37204	2.86088	0	-0.629605	-0.856409	-2.23261
7207	3B	Alta Tensao - Estrada da Onca	2014-12-14	-19.1118	-39.9881	-0.0161978	-6.06022	4.93512	-1.99672	2.06677	-6.40169	5.7205	-1.45037	1.65701	-3.56749	3.05703	-4.96751	3.50094	-1.1089	0.0179492	-9.02862	7.33652	-0.00499332	0	-4.13406	3.3212	0.00454686	6.21996	1.91744	1.91744	4.10284	3.45405	0.995467	1.33694	1.95158	2.08817	-0.40456	0.346674	-1.56556	-1.87288	-6.89249	-6.89249	6.21996	6.21996	1.91744	0	-0.874405	-0.974166	-1.746
7207	3C	Alta Tensao - Estrada da Onca	2014-12-14	-19.1118	-39.9881	-0.0190554	-8.22178	5.92237	-2.85675	2.68563	-9.28591	6.72048	-2.54638	2.28657	-6.00482	3.48373	-7.20198	4.37051	-1.26055	0.0252836	-11.6596	8.38061	-0.00601034	0	-6.13776	4.22062	0.00446754	7.43161	2.4213	2.28828	5.56937	4.54957	1.71187	0.958109	2.4213	2.55431	-0.505079	0.293024	-2.10128	-1.52488	-9.86061	-9.86061	7.54108	7.35261	2.34403	0	-0.682322	-1.2176	-1.74234
7207	3D	Alta Tensao - Estrada da Onca	2014-12-14	-19.1118	-39.9881	0	-6.74964	4.90883	-2.26266	1.34226	-7.28654	6.05934	-1.57236	1.53401	-4.18017	3.22142	-5.75253	4.02677	-1.22721	0	-9.64307	7.01314	3.55271e-15	0	-4.52949	3.41471	0	7.50353	2.9015	2.93985	5.39427	5.54767	1.9811	1.751	2.9015	3.09325	-0.281566	0.216987	-1.73887	-2.00733	-7.68316	-7.75986	7.47181	7.5266	2.92371	0	-0.605323	-0.316862	-1.89679
7207	3E	Alta Tensao - Estrada da Onca	2014-12-14	-19.1118	-39.9881	-0.0199179	-6.03194	5.79941	-1.94685	2.17678	-6.95686	6.53164	-1.94685	1.56016	-3.91231	3.56417	-5.18409	4.33494	-1.36877	0.0186207	-8.88074	8.52119	-0.00758121	0	-3.94217	3.85259	0.00546021	7.03103	2.67617	2.67617	5.25825	4.9114	1.2117	1.13462	2.63763	2.75324	-0.483998	0.440928	-1.94846	-1.90993	-6.57309	-6.57309	7.03103	7.03103	2.67617	0	-0.518379	-0.438746	-1.92745
7207	3F	Alta Tensao - Estrada da Onca	2014-12-14	-19.1118	-39.9881	-0.023088	-6.6408	4.49439	-2.00444	2.1564	-7.55223	5.60395	-2.44034	1.83938	-4.30281	2.47342	-5.92752	2.7508	-1.05339	0.0165391	-10.6286	7.17667	-0.00824317	0	-4.3016	2.60657	0.00468995	7.45742	2.66254	2.66254	5.35718	5.00054	1.39448	0.8397	2.66254	2.82105	-0.150976	0.0867865	-1.37941	-1.57755	-5.34212	-5.34212	7.45742	7.45742	2.66254	0	-0.150065	-0.712149	-1.51485
7207	3G	Alta Tensao - Estrada da Onca	2014-12-14	-19.1118	-39.9881	-0.019504	-6.13451	5.94357	-1.50078	2.18342	-7.16	7.27292	-1.12096	2.14543	-3.43783	4.0445	-4.80516	4.99404	-0.931057	0.0184774	-8.91413	8.62025	-0.00768501	0	-3.90274	4.06608	0.00771982	5.4221	2.1557	2.11772	3.33312	3.10523	0.674426	0.370575	2.07974	2.26964	0.104705	-0.123183	-1.64244	-2.66794	-5.09874	-5.13672	5.45007	5.39493	2.13643	0	-0.489353	-0.181007	-2.14611
7207	3H	Alta Tensao - Estrada da Onca	2014-12-14	-19.1118	-39.9881	0	-6.34892	6.0005	-1.81951	2.16792	-7.00703	6.69733	-1.54852	1.54852	-3.2906	3.67773	-4.4907	4.45198	-1.00654	0	-10.2724	9.70868	-1.77636e-15	0	-3.5047	3.9085	0	7.44686	2.64646	2.60774	5.51121	5.51121	0.943089	1.29151	2.60774	2.91745	-0.566714	0.633386	-2.19266	-1.84424	-5.17355	-5.17355	7.47906	7.41642	2.62655	0	-0.856787	-0.105103	-2.01769
3506	5A	Alta Tensao - Estrada Latrina	2014-05-04	-19.1146	-39.9876	0	-5.8911	5.39185	-2.04691	2.34645	-6.63996	6.14072	-1.39789	2.54615	-2.49623	3.2451	-4.19366	4.54313	-1.34796	0	-9.14078	8.36613	0	0	-3.07983	3.62931	0	8.25057	3.35797	3.10835	5.4548	4.90563	2.01001	1.16129	3.25812	3.45782	-0.586071	0.761892	-1.93403	-1.23509	-5.87807	-5.87807	8.4528	8.06548	3.22763	0	-1.04952	0.170785	-1.59854
3506	5B	Alta Tensao - Estrada Latrina	2014-05-04	-19.1146	-39.9876	0	-5.35079	5.49943	-1.22622	2.15518	-5.72238	6.09396	-1.04043	2.11802	-2.30381	3.67867	-3.8273	4.49615	-0.706008	0	-8.38869	8.62171	0	0	-3.26566	3.83101	0	6.63979	2.1808	2.21796	4.55893	4.26166	1.54911	0.285726	2.25512	2.29227	-0.0858564	0.137093	-1.31208	-1.46071	-5.58528	-5.62244	6.61107	6.66932	2.19912	0	-0.860024	-0.160663	-1.38042
3506	5C	Alta Tensao - Estrada Latrina	2014-05-04	-19.1146	-39.9876	0	-5.20657	4.50409	-1.48759	1.19834	-5.74375	5.12392	-0.743795	1.28098	-3.59501	2.93386	-4.42145	3.84294	-1.48759	0	-8.73756	7.55868	0	0	-3.53922	3.20258	0	6.5409	1.95416	1.91284	4.68141	4.4748	1.25169	0.42525	1.91284	2.07813	-0.318545	0.259962	-1.64085	-0.773087	-4.69867	-4.86396	6.57808	6.50874	1.93201	0	-0.229274	-0.0454014	-1.1766
3506	5D	Alta Tensao - Estrada Latrina	2014-05-04	-19.1146	-39.9876	0	-5.19633	5.74331	-1.27629	1.64095	-6.01681	6.42704	-1.96002	1.45862	-3.28189	4.23911	-4.42144	4.87726	-0.957219	0	-8.88585	9.8212	-1.77636e-15	0	-3.14363	4.16948	1.77636e-15	6.77264	2.26003	2.39678	5.17727	4.99494	1.34839	1.02932	2.30561	2.53352	-0.338135	0.436757	-1.56884	-1.61443	-3.98468	-3.9391	6.66156	6.8954	2.32499	0	-0.188808	0.660567	-1.59052
3506	5E	Alta Tensao - Estrada Latrina	2014-05-04	-19.1146	-39.9876	0	-5.07504	5.11956	-1.46909	1.91427	-5.65378	6.63317	-1.38006	1.55813	-2.80463	3.56143	-3.82854	4.27372	-0.890359	0	-7.73627	7.80413	1.77636e-15	0	-3.14307	3.57539	0	6.46568	2.37004	2.41455	5.21918	5.08563	1.52419	0.144138	2.41455	2.54811	-0.0784512	0.0996205	-1.59206	-1.6811	-5.28705	-5.37609	6.4319	6.49976	2.3922	0	-0.578761	0.0647281	-1.63413
3506	5F	Alta Tensao - Estrada Latrina	2014-05-04	-19.1146	-39.9876	-0.0269127	-4.86887	6.19846	-0.978011	2.04821	-5.12826	6.76047	-0.286303	1.83205	-1.84265	3.90718	-3.39899	4.68535	-0.891548	0.0163191	-8.03291	10.2025	-0.00991886	0	-2.54737	4.0527	0.00466	7.15877	2.61944	2.66267	5.29981	5.34304	1.92773	1.66834	2.57621	2.8356	-0.27709	0.587545	-1.18496	-1.31465	-4.29764	-4.34087	7.1275	7.19873	2.63842	0	-0.68818	0.231813	-1.23956
3506	5G	Alta Tensao - Estrada Latrina	2014-05-04	-19.1146	-39.9876	0	-5.54314	5.011	-1.72946	0.842558	-6.16397	5.76487	-1.64077	0.886903	-3.68065	2.2616	-4.96666	2.88243	-1.28601	0	-8.17705	7.39206	0	0	-3.55202	2.57601	0	5.4796	2.24241	2.28675	3.83883	3.08497	1.35551	0.601638	2.19806	2.3311	-0.32961	0.202532	-1.83734	-2.19211	-4.58674	-4.49805	5.44525	5.51066	2.2657	0	-0.178802	-1.01018	-2.06183
3506	5H	Alta Tensao - Estrada Latrina	2014-05-04	-19.1146	-39.9876	-0.025751	-5.18899	5.85585	-2.13594	1.23138	-6.35633	6.17013	-1.46248	1.09669	-3.16859	3.83545	-4.8747	4.28443	-1.0135	0.0191467	-7.31056	8.23348	-0.0127554	0	-2.92211	3.85985	0.00621137	5.20171	2.59764	2.55274	3.31601	3.00172	1.65479	0.622143	2.41805	2.64254	-0.365607	0.442552	-1.39825	-1.12887	-3.86763	-3.86763	5.23132	5.16813	2.5766	0	-0.216418	0.357149	-1.2547
3506	5J	Alta Tensao - Estrada Latrina	2015-05-04	-19.1146	-39.9876	-0.0261215	-6.37691	5.05451	-2.33962	1.56158	-6.83054	5.78032	-1.20555	1.24404	-2.9747	2.28738	-3.97268	3.6029	-1.0241	0.0192413	-9.93543	7.8559	-0.00990551	0	-3.43354	2.81946	0.00756238	6.73934	2.65669	2.47523	4.24438	4.01757	1.2958	0.660723	2.61132	2.5206	0.025644	-0.0197188	-1.87959	-2.01568	-4.82817	-4.96426	6.89663	6.61423	2.55562	0	-0.850313	-0.827007	-1.95109
3506	5K	Alta Tensao - Estrada Latrina	2015-05-04	-19.1146	-39.9876	-0.0243556	-5.92799	5.69479	-2.05373	1.82053	-7.17329	7.30907	-1.31578	1.68216	-2.23822	3.43481	-4.0831	4.35725	-0.992921	0.0217665	-8.77177	8.4063	-0.00943997	0	-3.24073	3.63609	0.00924154	6.9657	2.67634	2.72247	4.38286	4.06001	1.56941	1.20044	2.5841	2.76859	-0.0909845	0.139626	-2.39709	-2.90444	-6.13299	-6.22523	6.93099	6.99916	2.69983	0	-1.34413	-0.524597	-2.64308
4814	8A	Caixa dagua - estrada 1	2014-05-04	-19.0767	-39.9769	-0.0191447	-4.73209	5.23243	-2.13997	2.16901	-5.27072	6.04036	-1.3657	2.00069	-1.93799	3.17893	-3.92416	4.42449	-1.02906	0.0145193	-7.17055	7.913	-0.00771986	0	-2.45041	3.68121	0.00402326	7.38984	2.97986	2.97986	5.43733	5.13436	2.34025	1.86895	2.9462	3.11452	-0.790495	1.29667	-2.17072	-0.857823	-5.57077	-5.60444	7.38984	7.38984	2.97986	0	-1.14659	0.427859	-1.55298
4814	8B	Caixa dagua - estrada 1	2014-05-04	-19.0767	-39.9769	0.0206561	-4.09279	5.23339	-1.53962	1.3327	-4.90839	6.11991	-1.25593	1.61639	-1.50416	3.49581	-3.02897	4.5951	-0.653098	-0.0148046	-6.00129	7.68954	0.00935121	0	-2.06586	3.51935	-0.00593528	7.5808	3.43189	3.43189	5.7723	5.34677	2.36807	2.11984	3.32551	3.53828	-0.256027	0.595032	-2.20637	-2.13545	-5.36238	-5.4333	7.5808	7.5808	3.43189	0	-0.974484	0.53656	-2.17825
4814	8C	Caixa dagua - estrada 1	2014-05-04	-19.0767	-39.9769	0	-4.37653	5.47956	-1.53001	2.13489	-5.08816	5.87096	-1.38768	1.63675	-1.9214	3.13118	-3.16676	3.98513	-0.747213	0	-6.66405	8.34361	0	0	-2.44217	3.59572	0	6.90382	2.56287	2.49171	4.91126	4.37753	1.70892	0.819378	2.56287	2.63404	-0.568303	0.926123	-1.95598	-1.45784	-5.83437	-5.83437	6.95194	6.84358	2.53127	0	-1.14858	-0.370739	-1.73541
4814	8D	Caixa dagua - estrada 1	2014-05-04	-19.0767	-39.9769	-0.0203545	-5.09049	5.08499	-2.02728	1.52885	-5.4778	6.03565	-1.85124	1.45844	-2.06249	3.32453	-3.15398	4.76811	-0.689331	0.0148548	-8.47615	8.4473	-0.0063154	0	-2.81951	3.38744	0.00562604	6.43204	1.99566	1.99566	4.63636	4.49553	0.939386	0.446456	2.03087	2.17171	0.0943625	-0.152103	-1.45485	-2.26466	-4.72931	-4.6941	6.43204	6.43204	1.99566	0	-0.98011	-0.244165	-1.77783
4814	8E	Caixa dagua - estrada 1	2014-05-04	-19.0767	-39.9769	0.0196347	-4.50579	5.0195	-1.73214	1.47945	-4.90724	5.71291	-1.2942	0.895524	-2.60803	3.04875	-3.70289	3.81515	-1.2942	-0.0168607	-7.10441	7.93502	0.00625383	0	-2.93309	3.34164	-0.00488578	6.40091	2.02146	2.05796	4.28418	4.0652	0.926601	1.14557	2.05796	2.31343	-0.16826	0.196694	-1.66457	-1.51859	-5.42359	-5.49659	6.37361	6.43124	2.03875	0	-0.6125	-0.458828	-1.59276
4814	8F	Caixa dagua - estrada 1	2014-05-04	-19.0767	-39.9769	0.0176258	-5.27636	5.09233	-2.04985	1.92847	-5.77756	5.75016	-1.51732	1.77185	-3.17756	2.80558	-4.14865	3.74534	-1.45467	-0.0136996	-8.31813	8.04357	0.00615181	0	-3.33767	3.15303	-0.00439759	6.78591	2.40037	2.33772	4.78109	4.40519	1.55458	1.36663	2.36904	2.43169	-0.199637	0.176267	-1.57795	-1.79723	-5.21169	-5.27434	6.83628	6.73742	2.36845	0	-0.426889	-0.553384	-1.69307
4814	8I	Caixa dagua - estrada 1	2014-05-04	-19.0767	-39.9769	0.0190024	-4.74652	4.6412	-1.41424	1.73889	-5.67813	5.53698	-1.62922	1.23726	-2.73999	2.95715	-3.95824	3.92458	-1.37841	-0.0168286	-7.19346	7.05107	0.0067855	0	-2.97086	3.25889	-0.004771	6.21379	2.20072	2.23655	4.42224	4.24308	1.44826	0.982461	2.20072	2.23655	-0.379118	0.409165	-2.02734	-1.09574	-5.43129	-5.50295	6.18626	6.24063	2.21886	0	-0.69147	-0.0602177	-1.56012
4814	8J	Caixa dagua - estrada 1	2014-05-04	-19.0767	-39.9769	-0.0207186	-4.73898	4.29831	-1.90802	1.794	-6.00929	5.45973	-1.94432	0.922935	-2.7065	2.91912	-4.04939	3.97166	-1.3999	0.0155758	-6.95778	6.29692	-0.00917036	0	-2.74691	2.9087	0.00897962	6.38132	2.82447	2.82447	4.16736	4.23995	1.73564	1.22752	2.75188	2.89706	-0.296842	0.320162	-2.69227	-2.83745	-4.83364	-4.79734	6.38132	6.38132	2.82447	0	-0.368927	0.351437	-2.76572
4814	8K	Caixa dagua - estrada 1	2014-05-04	-19.0767	-39.9769	0	-5.12957	4.87125	-1.29162	2.36182	-5.64622	6.23667	-1.1071	2.28801	-2.1404	2.84156	-3.57963	4.24389	-0.811874	0	-7.60014	7.2174	0	0	-2.93538	3.13064	0	7.03296	2.67837	2.67837	4.81876	4.1545	1.49746	0.501066	2.71527	2.78908	0.0951287	-0.126292	-2.22978	-2.19288	-6.28916	-6.36296	7.03296	7.03296	2.67837	0	-1.18908	-0.552304	-2.2129
4814	8L	Caixa dagua - estrada 1	2014-05-04	-19.0767	-39.9769	0	-4.88069	5.57793	-1.011	2.92841	-5.85682	6.62379	-1.25503	2.12658	-2.54493	2.89355	-4.35776	4.25317	-0.801827	0	-7.30348	8.34684	0	0	-2.69464	3.26618	0	6.80637	2.97154	2.93668	4.81923	4.54033	1.82109	1.12385	2.97154	3.14585	-0.375214	0.426613	-2.01373	-2.11832	-4.69811	-4.80269	6.83071	6.77854	2.95527	0	-0.510525	-0.270871	-2.06666
4814	8M	Caixa dagua - estrada 1	2014-05-04	-19.0767	-39.9769	0	-4.54534	5.94391	-1.60835	1.8531	-5.20966	6.50334	-1.53842	1.99296	-2.55239	3.35656	-3.49642	4.26563	-1.11885	0	-7.12931	9.32294	0	0	-2.7382	3.62799	0	7.25579	2.64052	2.67548	5.57751	5.40269	1.80138	1.27692	2.67548	2.81534	-0.226543	0.29792	-1.97475	-2.32439	-5.33131	-5.43621	7.23203	7.28687	2.65567	0	-0.57064	-0.485061	-2.13225
4814	8N	Caixa dagua - estrada 1	2014-05-04	-19.0767	-39.9769	-0.0243042	-4.95013	5.33298	-1.64228	2.24086	-5.52541	6.41163	-1.13891	2.31277	-1.7861	2.99591	-3.33216	4.47006	-0.743403	0.0116507	-8.58703	9.23342	-0.00909671	0	-2.23215	3.04503	0.00792445	7.87456	2.91278	2.98469	5.6094	5.32176	2.01391	1.36672	2.87683	3.12851	-0.107434	0.180205	-2.33664	-2.87597	-3.73888	-3.77484	7.81468	7.9393	2.94733	0	-0.750583	0.078373	-2.56752
4814	8O	Caixa dagua - estrada 1	2014-05-04	-19.0767	-39.9769	-0.0326888	-4.30412	5.82811	-1.22472	1.98713	-4.93324	6.78835	-0.794261	1.52357	-1.88695	3.51028	-3.07898	4.10629	-0.926709	0.0335349	-6.40374	8.63295	-0.0110888	0	-2.57513	3.8635	0.00967033	6.63582	2.26506	2.23194	4.98023	4.81467	1.63593	1.2717	2.23194	2.46373	-0.185222	0.344567	-2.20505	-1.64214	-6.77448	-6.80759	6.65664	6.6075	2.25103	0	-1.3513	-0.832843	-1.96308
4814	8P	Caixa dagua - estrada 1	2014-05-04	-19.0767	-39.9769	0	-5.42326	4.02371	-2.58917	2.09933	-5.80814	5.07337	-2.13432	1.46953	-2.55418	1.78443	-4.3736	2.83409	-1.43454	0	-8.60561	6.38481	0	0	-3.08706	2.38758	0	7.73421	2.66084	2.73082	5.80983	5.00509	1.5412	1.19131	2.69583	2.90576	-0.453161	0.316592	-2.37754	-1.5728	-5.73647	-5.87642	7.67047	7.78151	2.70101	0	-1.01679	-0.76908	-1.88923
4814	8Q	Caixa dagua - estrada 1	2014-05-04	-19.0767	-39.9769	0	-6.62875	4.46568	-1.50019	1.74441	-6.87296	5.93098	-1.70952	0.907091	-3.38415	3.10504	-4.74479	4.15169	-1.32575	0	-10.3166	6.95012	0	0	-3.85483	3.07567	0	5.97956	2.24653	2.21164	4.20027	3.99094	1.30455	1.06034	2.21164	2.31631	-0.0909717	0.0834689	-1.52139	-1.06784	-4.55665	-4.52176	6.01201	5.95771	2.22569	0	-0.585785	0.115775	-1.27949
4814	8R	Caixa dagua - estrada 1	2014-05-04	-19.0767	-39.9769	0	-3.44311	5.99988	-1.7386	1.7386	-4.05673	6.71577	-0.988616	1.46588	-1.22725	4.39764	-2.72722	5.2158	-0.886345	0	-5.36566	9.35005	0	0	-1.84361	4.26777	0	7.55873	2.99064	2.95655	5.68377	5.5815	1.59294	2.17248	2.92246	3.19518	-0.111568	0.399785	-1.85017	-0.827462	-5.19101	-5.2251	7.5781	7.52497	2.97821	0	-0.825989	0.594586	-1.49902
4814	8S	Caixa dagua - estrada 1	2014-05-04	-19.0767	-39.9769	0.0203025	-4.78898	4.99261	-1.65072	1.97662	-5.56335	6.17455	-1.24315	1.56905	-2.46585	3.44386	-4.09612	4.87034	-1.24315	-0.0204542	-7.3477	7.68255	0.00606998	0	-3.19923	3.73014	-0.00524322	6.39527	1.91204	1.91204	4.19442	3.99063	1.21918	1.09691	1.91204	1.9528	-0.0850294	0.118754	-1.83756	-1.43	-6.44306	-6.44306	6.39527	6.39527	1.91204	0	-0.873412	-0.192068	-1.65162
3344	1A	Estrada do Alagado	2014-05-04	-19.0885	-39.9777	0.0222349	-6.26398	5.89189	-2.59071	1.8778	-7.13496	6.87648	-2.9694	1.49912	-3.38595	3.77124	-4.63562	3.73337	-1.30317	-0.0156338	-10.4545	9.85381	0.00703317	0	-3.70387	3.76237	-0.00715799	8.00457	2.55148	2.51361	5.73245	5.35376	1.41541	1.03673	2.47574	2.66508	-0.250811	0.279351	-2.40933	-2.71228	-5.66604	-5.62817	8.03721	7.97395	2.53194	0	-0.799939	-0.421307	-2.57688
3344	1B	Estrada do Alagado	2014-05-04	-19.0885	-39.9777	-0.0222417	-6.78453	5.46272	-1.93822	1.93131	-7.57346	6.17652	-1.93822	1.93131	-3.77907	3.09592	-5.50721	3.62188	-1.33713	0.0153265	-11.0952	8.91604	-0.0076659	0	-4.06292	3.24518	0.00690111	8.22943	2.85717	2.8196	5.86263	5.59965	1.65499	1.42958	2.85717	2.96988	-0.185856	0.152258	-2.43995	-2.62779	-5.70839	-5.67082	8.2634	8.20201	2.83638	0	-0.556106	-0.636696	-2.55341
3344	1C	Estrada do Alagado	2014-05-04	-19.0885	-39.9777	0	-6.23552	6.12215	-2.00293	1.81397	-7.06693	7.29367	-2.532	1.73839	-2.60758	3.96806	-5.02621	4.68609	-1.20931	0	-10.1091	9.9253	0	0	-3.43334	4.05747	0	8.23258	2.94184	2.86626	5.24709	4.86918	1.58136	1.3924	2.82846	2.97963	-0.194819	0.296464	-2.34891	-2.19774	-5.59894	-5.67452	8.29441	8.17188	2.9037	0	-0.930264	-0.0141052	-2.27068
3344	1D	Estrada do Alagado	2014-05-04	-19.0885	-39.9777	-0.0213663	-6.4866	6.02305	-2.08718	1.7384	-7.51951	7.05596	-2.62276	1.43235	-3.34962	3.53642	-5.30067	4.79887	-1.32206	0.0168895	-10.0649	9.32775	-0.00778816	0	-3.78105	3.94597	0.00598536	7.58503	2.7648	2.7648	5.17491	4.94538	1.38759	1.04328	2.72654	2.84131	-0.37218	0.392936	-2.66753	-1.63462	-6.11055	-5.99579	7.58503	7.58503	2.7648	0	-0.87974	-0.264826	-2.1248
3344	1E	Estrada do Alagado	2014-05-04	-19.0885	-39.9777	0	-5.82176	6.71119	-1.8193	1.49587	-6.63034	7.31763	-1.45544	1.49587	-3.31517	4.56846	-4.89189	5.86219	-1.33415	0	-8.8905	10.2488	0	0	-3.64314	4.77005	0	7.6819	2.83044	2.79001	5.5796	5.53917	1.658	1.25371	2.83044	2.99215	-0.323016	0.445132	-1.81888	-1.61674	-6.30649	-6.42778	7.71058	7.64884	2.81166	0	-0.63417	0.123856	-1.72693
3344	1F	Estrada do Alagado	2014-05-04	-19.0885	-39.9777	-0.0252125	-6.23606	6.14504	-2.01431	2.4916	-6.84496	7.11929	-2.42024	1.96388	-2.94796	3.30348	-4.28756	3.87179	-1.04006	0.0153813	-10.0301	9.86514	-0.00988083	0	-3.20342	3.53594	0.00556162	8.24448	3.25144	3.21085	6.01182	5.76826	2.07422	1.18116	3.21085	3.33263	-0.401995	0.450474	-2.3099	-1.37625	-4.98909	-5.02968	8.27728	8.21205	3.23103	0	-0.765822	-0.296743	-1.81865
3344	1G	Estrada do Alagado	2014-05-04	-19.0885	-39.9777	-0.0219423	-5.54967	7.51946	-1.60129	1.63638	-6.06296	8.3881	-1.52233	1.39947	-3.10168	4.55817	-4.40464	5.34785	-0.930069	0.0175415	-8.91939	12.0602	-0.00705469	0	-3.54695	4.67282	0.00707922	7.48231	2.3889	2.42839	5.50812	5.15277	1.08594	0.77007	2.46787	2.66529	0.335748	-0.493411	-2.4676	-2.34915	-5.90269	-5.98165	7.45543	7.51881	2.40565	0	-0.622272	-0.762837	-2.41402
3344	1H	Estrada do Alagado	2014-05-04	-19.0885	-39.9777	0	-6.52537	4.95444	-1.89316	1.77232	-7.69349	5.92116	-2.49736	1.24868	-4.4308	2.90016	-5.8406	3.54464	-1.53064	0	-9.61345	7.2991	0	0	-4.6045	3.13258	0	7.54919	2.83642	2.79614	5.25322	5.01154	1.22522	1.02382	2.83642	2.91698	0.0973803	-0.0637398	-1.63466	-2.31942	-7.15303	-7.19331	7.58292	7.52358	2.81353	0	-0.116018	-0.877207	-2.0608
3344	1I	Estrada do Alagado	2014-05-04	-19.0885	-39.9777	0	-5.50433	4.94963	-1.15207	1.57876	-6.1017	5.84569	-1.40809	1.02406	-4.26692	3.41354	-5.07764	4.22426	-1.36542	0	-8.49261	7.63677	0	0	-4.21033	3.5337	0	7.43393	2.44163	2.31362	5.42848	5.47115	1.46024	1.07621	2.39896	2.56964	0.0948205	-0.0758564	-1.91063	-1.8253	-6.90294	-6.94561	7.53792	7.34042	2.37423	0	0.234809	-0.335149	-1.86405
3344	1J	Estrada do Alagado	2014-05-04	-19.0885	-39.9777	0	-6.03967	4.86948	-1.69866	1.66091	-6.64364	5.73769	-1.69866	1.05694	-3.35957	3.66155	-4.75624	4.643	-1.35893	0	-9.0172	7.27012	0	0	-3.76603	3.58554	0	7.04892	2.59466	2.67016	4.97278	4.78404	1.53772	1.57547	2.59466	2.7834	-0.198684	0.216543	-2.12383	-0.878147	-6.2761	-6.31385	6.98652	7.09923	2.63646	0	-0.75895	0.301327	-1.49348
3344	1K	Estrada do Alagado	2014-05-04	-19.0885	-39.9777	0	-6.60546	6.55828	-1.69855	1.41546	-6.84137	6.88856	-1.74573	0.660546	-4.67101	4.4351	-5.94492	5.9921	-1.32109	0	-9.7377	9.66814	0	0	-4.91526	4.85437	0	6.72281	2.14616	2.19335	4.83553	4.17499	1.10816	0.77789	2.24053	2.24053	-0.0242021	0.0229798	-1.48684	-1.20375	-7.33739	-7.43176	6.68791	6.75746	2.16984	0	-0.304637	-0.307357	-1.34585
3344	1L	Estrada do Alagado	2014-05-04	-19.0885	-39.9777	-0.0212397	-5.76415	5.18567	-1.85897	2.00792	-6.4533	5.98968	-1.82069	1.54849	-3.31384	3.61594	-5.075	4.87938	-1.05496	0.0170464	-8.8821	7.97323	-0.00782564	0	-3.57511	3.62984	0.00822672	7.24275	2.64842	2.6867	4.83072	4.71586	1.27012	1.38498	2.57184	2.6867	-0.146468	0.15982	-2.90307	-2.71164	-5.77452	-5.81281	7.21176	7.2707	2.66854	0	-0.555411	0.128228	-2.80531
3344	1M	Estrada do Alagado	2015-05-04	-19.0885	-39.9777	-0.0194392	-5.52832	5.06862	-1.47317	1.43429	-5.79611	5.83374	-1.28189	1.35778	-3.42423	3.57663	-4.91622	4.34176	-0.746305	0.0188169	-8.9672	8.19919	-0.00479887	0	-3.98997	3.70075	0.00665069	5.79288	1.46994	1.39343	3.76531	3.72705	0.43703	0.398774	1.46994	1.69948	0.130982	-0.136811	-1.51403	-2.39392	-5.60743	-5.60743	5.85749	5.73354	1.43006	0	-0.492778	-0.502941	-1.98191
3344	1N	Estrada do Alagado	2014-05-04	-19.0885	-39.9777	0	-5.9067	5.58255	-1.58472	1.29659	-6.51898	6.15881	-1.33261	1.26058	-4.03384	3.38555	-5.40247	4.24994	-1.40464	0	-9.14896	8.64688	0	0	-4.32605	3.49296	0	6.77914	2.3131	2.38513	4.54612	4.25798	1.48472	1.26862	2.34911	2.38513	0.548289	-0.460171	-1.25253	-1.97286	-5.71857	-5.71857	6.72178	6.83335	2.35013	0	0.163803	-0.648146	-1.6557
3344	1O	Estrada do Alagado	2014-05-04	-19.0885	-39.9777	0	-6.06816	5.33998	-1.97649	1.42168	-6.58829	5.58271	-1.94181	1.07493	-3.9183	3.15545	-5.16661	3.60622	-1.42168	0	-9.75123	8.58108	0	0	-4.21176	3.29395	0	7.05352	2.26834	2.12964	5.04236	4.86898	0.950679	0.881329	2.16431	2.23366	0.326525	-0.262954	-1.92736	-2.37814	-5.77631	-5.81099	7.17207	6.94919	2.19456	0	-0.203332	-0.912847	-2.19284
3344	1P	Estrada do Alagado	2014-05-04	-19.0885	-39.9777	0	-5.12843	5.39239	-1.39523	1.47065	-5.50552	6.10886	-1.77232	1.20669	-3.80861	3.88403	-4.97759	4.48737	-1.62149	0	-8.03685	8.45051	0	0	-3.85799	3.97039	0	6.27873	1.86678	1.79136	4.12932	3.78994	0.735511	0.509256	1.90449	1.9422	-0.0186697	0.0190394	-1.60245	-1.97954	-5.86357	-6.0144	6.33635	6.21816	1.83002	0	-0.0855752	-0.267048	-1.80076
3344	1Q	Estrada do Alagado	2014-05-04	-19.0885	-39.9777	-0.0240625	-5.54614	5.13788	-1.54463	1.49651	-5.9863	5.57804	-1.58465	1.13637	-3.5854	3.0571	-4.9059	4.49764	-1.10447	0.0159526	-9.29381	8.58897	-0.00795432	0	-3.77804	3.13895	0.00604991	6.42469	2.10306	2.14308	4.58399	4.46395	1.22273	0.902609	2.10306	2.26312	0.302383	-0.257827	-1.21819	-1.97847	-4.1793	-4.25933	6.38997	6.45694	2.1238	0	0.080558	-0.355591	-1.61532
3344	1R	Estrada do Alagado	2014-05-04	-19.0885	-39.9777	0	-6.46564	5.75252	-2.23445	1.61641	-6.9886	6.51318	-1.90166	1.18854	-4.51644	4.04103	-5.80006	4.51644	-1.61641	0	-10.907	9.70403	0	0	-4.71945	4.05131	0	6.86182	1.91751	1.82242	4.05687	4.05687	0.776511	0.301096	1.96505	2.10767	0.301096	-0.269402	-1.9809	-2.36123	-5.45142	-5.40388	6.9467	6.7863	1.86719	0	-0.0598028	-0.314637	-2.19472
3344	1S	Estrada do Alagado	2014-05-04	-19.0885	-39.9777	-0.0399795	-6.0922	6.66758	-1.89034	1.96458	-6.51624	7.74695	-1.65904	1.46344	-3.70215	5.00996	-5.05137	5.47255	-0.96516	0.0371189	-9.60065	10.4629	-0.0119133	0	-4.13933	4.98895	0.0132603	6.97642	2.04213	2.11923	4.43218	4.00813	0.692906	0.847103	2.04213	2.08068	0.114668	-0.155176	-2.31393	-2.31393	-6.47724	-6.47724	6.91865	7.03988	2.07887	0	-0.672245	-0.0571304	-2.31393
3344	1T	Estrada do Alagado	2014-05-04	-19.0885	-39.9777	0	-5.81796	7.16057	-2.03425	2.11562	-6.2655	7.64879	-1.46466	1.58672	-3.41754	4.76015	-4.6381	5.20769	-1.26124	0	-9.30325	11.4502	0	0	-3.7104	4.7931	0	7.86922	2.70222	2.70222	5.38743	5.02126	1.48166	1.44098	2.62085	2.7429	0.0170027	-0.0236823	-1.81382	-1.73245	-5.88233	-5.92301	7.86922	7.86922	2.70222	0	-0.422281	-0.149503	-1.77549
3559	7A	Caixa dagua - principal	2014-05-04	-19.0774	-39.9691	-0.0190197	-4.89586	6.08532	-1.5451	2.36963	-5.29396	6.81519	-1.18017	1.70612	-2.54038	4.26065	-3.80106	4.89099	-1.08064	0.014156	-7.62716	9.46254	-0.0071614	0	-2.94631	4.13252	0.00447418	7.36063	2.68284	2.8819	4.27528	3.71129	1.6544	2.31791	2.81555	2.98143	0.0619604	-0.103918	-1.86223	-1.56365	-5.47839	-5.47839	7.22271	7.5325	2.77146	0	-0.557619	0.192803	-1.73151
3559	7B	Caixa dagua - principal	2014-05-04	-19.0774	-39.9691	-0.0199014	-5.04118	5.78702	-2.13772	2.06376	-5.55355	6.40187	-1.96693	2.06376	-2.92336	3.83999	-3.8798	4.65979	-1.11297	0.014257	-7.72636	8.8532	-0.00805205	0	-3.08771	3.76158	0.00506264	7.1446	2.87481	2.90897	3.89956	3.89956	2.05501	1.85006	2.87481	2.94312	0.0738223	-0.0969695	-1.59994	-2.07815	-5.15241	-5.11825	7.12029	7.17259	2.89068	0	-0.213787	0.0925273	-1.81749
3559	7C	Caixa dagua - principal	2014-05-04	-19.0774	-39.9691	-0.0383483	-5.37799	4.83542	-2.04519	1.82515	-5.91554	5.98219	-1.83018	1.5743	-2.58274	2.93608	-4.12371	4.2262	-1.18512	0.0333248	-7.55976	6.77156	-0.017754	0	-3.01781	3.09168	0.0139469	7.30536	3.36334	3.39917	5.01182	4.25925	2.57493	2.43159	3.3275	3.36334	-0.184482	0.20972	-2.62137	-2.69304	-6.34837	-6.34837	7.27896	7.32925	3.38214	0	-0.872492	-0.140365	-2.65688
3559	7E	Caixa dagua - principal	2014-05-04	-19.0774	-39.9691	0.018775	-4.62111	6.01748	-1.87032	2.13986	-5.61537	6.5809	-1.73775	2.23929	-2.40059	3.06784	-4.15712	4.12839	-1.04177	-0.014367	-6.71497	8.75909	0.00841854	0	-2.73682	3.37585	-0.00502148	7.62267	3.44677	3.38049	4.9713	4.5736	2.48565	2.31994	3.38049	3.34735	0	0	-1.82281	-2.25366	-5.79986	-5.833	7.66462	7.56821	3.41793	0	-0.348916	-0.654527	-2.03872
3559	7F	Caixa dagua - principal	2014-05-04	-19.0774	-39.9691	-0.0200569	-5.15457	5.90149	-2.94335	2.22863	-5.67926	6.5761	-2.75596	2.1162	-2.90588	3.84019	-4.21761	4.5148	-0.994489	0.0174213	-7.43524	8.49618	-0.00858777	0	-3.13946	3.92536	0.006096	7.20043	3.15278	3.00287	4.57695	4.31461	2.02844	2.06592	3.11531	3.04035	-0.145294	0.19201	-2.20659	-2.16911	-6.25423	-6.25423	7.30097	7.08495	3.08301	0	-0.512362	-0.106075	-2.18847
3559	7G	Caixa dagua - principal	2014-05-04	-19.0774	-39.9691	0.0172804	-5.09605	5.94875	-1.76508	2.61777	-5.41746	6.53313	-1.26836	2.29637	-1.99883	4.13716	-3.16759	4.86764	-1.29758	-0.0119387	-7.65011	8.94316	0.00751006	0	-2.51209	4.071	-0.00482318	7.62064	3.32544	3.29622	4.84483	4.64029	2.47809	2.27355	3.29622	3.29622	-0.180847	0.374315	-2.13852	-2.1093	-5.20652	-5.26496	7.64092	7.59702	3.31194	0	-1.04056	0.599265	-2.12702
3559	7H	Caixa dagua - principal	2014-05-04	-19.0774	-39.9691	0.0175909	-6.00637	5.38752	-2.08219	1.60103	-6.41944	5.86944	-2.01335	1.22238	-3.28698	3.42543	-4.18197	3.87293	-1.49701	-0.0168317	-8.17048	7.34019	0.00845463	0	-3.4881	3.48981	-0.00696776	6.56142	3.15358	3.15358	4.11741	3.91087	2.22417	2.15532	3.08473	3.188	-0.18542	0.19323	-2.97365	-2.25078	-6.2438	-6.27823	6.56142	6.56142	3.15358	0	-0.811977	-0.158359	-2.59897
3559	7J	Caixa dagua - principal	2014-05-04	-19.0774	-39.9691	0	-4.96311	5.8714	-1.94632	2.04363	-5.35238	6.39041	-1.68681	1.65437	-2.17339	3.8602	-3.14655	4.4441	-1.81656	0	-6.92422	8.1914	0	0	-2.66127	3.96514	0	7.7708	3.55378	3.55378	5.40278	5.04595	2.54818	2.4833	3.55378	3.68353	-0.338862	0.601859	-2.44737	-2.25274	-7.0861	-7.11854	7.7708	7.7708	3.55378	0	-1.39594	0.0888147	-2.36669
3559	7L	Caixa dagua - principal	2014-05-04	-19.0774	-39.9691	0	-5.58693	5.55307	-2.16705	2.06547	-5.99325	6.1287	-2.03161	1.76073	-2.87812	3.6569	-3.6569	3.75848	-1.35441	0	-8.27378	8.22363	0	0	-3.12691	3.63784	0	7.5496	3.28321	3.28321	4.87464	4.36674	2.19968	2.13196	3.28321	3.35093	0.134213	-0.170529	-2.236	-2.26986	-5.58816	-5.58816	7.5496	7.5496	3.28321	0	-0.622999	0.223503	-2.2527
3559	7M	Caixa dagua - principal	2014-05-04	-19.0774	-39.9691	0	-4.86284	6.14802	-1.70199	2.36195	-5.66174	7.05112	-1.56306	1.94514	-2.32722	3.99448	-3.75133	4.75864	-1.35465	0	-6.55607	8.28874	0	0	-2.90101	3.9934	0	6.7219	3.31792	3.14424	4.01261	3.83893	2.24114	1.92853	3.14424	3.07477	0.191804	-0.329215	-2.13541	-3.28165	-6.78985	-6.75511	6.82531	6.59117	3.24121	0	-0.745867	-0.32506	-2.64069
3129	1A	Alta Tensao - principal	2014-05-02	-19.1124	-39.9828	0.030258	-5.4983	6.54052	-1.67481	4.00875	-6.22166	7.57389	-1.67481	4.06042	-2.29483	4.78378	-4.05157	4.88712	-1.41647	-0.0214107	-8.92237	10.6429	0.0103818	0	-3.06782	4.75379	-0.00906471	8.47225	2.78869	3.04704	4.95878	4.54543	1.65198	1.85866	3.04704	3.09871	0.0502518	-0.104754	-2.58485	-2.48152	-5.99499	-5.99499	8.28014	8.69999	2.90691	0	-1.10923	0.585013	-2.53812
3129	1B	Alta Tensao - principal	2014-05-02	-19.1124	-39.9828	-0.0223236	-5.86999	6.51783	-2.17673	1.63195	-6.37012	7.40268	-1.98437	1.51654	-3.25393	4.01718	-4.98515	4.9405	-1.09953	0.0161479	-8.97246	9.94474	-0.00904495	0	-3.63864	3.9823	0.00579062	8.08114	3.31067	3.23373	5.31119	4.73412	2.31042	2.04112	3.31067	3.2722	0.309898	-0.382589	-1.80603	-2.38311	-5.73013	-5.84554	8.13673	8.01923	3.27427	0	-0.160309	-0.307009	-2.09621
3129	1C	Alta Tensao - principal	2014-05-02	-19.1124	-39.9828	-0.0245069	-6.02369	6.2768	-1.3193	2.60823	-6.54161	6.96735	-0.715061	2.26295	-2.9162	4.11882	-4.38363	5.32729	-1.62141	0.0186528	-9.27569	9.64493	-0.00940576	0	-3.41762	4.21883	0.00652837	8.65092	3.29913	3.34229	6.06135	5.24131	2.17698	2.17698	3.34229	3.47177	-0.196799	0.277957	-2.4411	-2.13898	-6.7139	-6.58442	8.61846	8.68485	3.32023	0	-0.963668	0.0779287	-2.30452
3129	1D	Alta Tensao - principal	2014-05-02	-19.1124	-39.9828	-0.0400418	-4.81919	6.30666	-3.17516	2.86568	-5.66032	6.95663	-3.02223	2.36865	-2.90753	3.93621	-4.78095	5.04497	-1.33997	0.0364245	-7.29654	9.50576	-0.0142086	0	-3.19376	4.22861	0.0130713	7.40773	2.62859	2.62859	4.04322	3.46972	2.09332	1.2522	2.62859	2.62859	-0.162432	0.2199	-2.41819	-2.41819	-6.7003	-6.73854	7.40773	7.40773	2.62859	0	-0.507077	-0.475819	-2.41819
3129	1E	Alta Tensao - principal	2014-05-02	-19.1124	-39.9828	0	-5.73531	6.46666	-2.27103	2.57896	-6.2742	7.2365	-2.07857	2.07857	-3.00238	3.65674	-3.77222	5.19642	-1.4242	0	-8.69163	9.79996	-3.55271e-15	0	-3.24224	3.70604	0	8.45534	3.56685	3.60534	5.33749	5.14503	1.79622	2.21963	3.56685	3.64384	0.295031	-0.359333	-2.36092	-2.78433	-5.97917	-5.86369	8.42792	8.48625	3.58494	0	-0.532493	-0.436984	-2.53901
3129	1F	Alta Tensao - principal	2014-05-02	-19.1124	-39.9828	-0.0769048	-5.97854	6.23457	-1.79822	2.05424	-6.5933	6.48047	-1.71625	1.72637	-2.94576	3.81654	-4.0933	4.59523	-1.14248	0.046046	-9.38456	9.73327	-0.0324991	0	-3.11104	3.84338	0.018391	7.4854	3.22311	3.10016	4.9854	4.86245	2.56737	1.7477	3.22311	3.14114	-0.178531	0.231305	-2.02279	-1.53099	-4.52279	-4.48181	7.5791	7.38664	3.16325	0	-0.44417	0.170555	-1.79006
3129	1G	Alta Tensao - principal	2014-05-02	-19.1124	-39.9828	-0.0222401	-5.49738	6.42129	-1.66106	2.7712	-6.24229	7.27794	-1.43758	2.36149	-3.0764	4.67073	-4.45449	4.9687	-0.91614	0.0150057	-8.66821	10.1063	-0.00863914	0	-3.31	4.5415	0.00601925	7.91749	3.07553	3.07553	5.45927	4.93782	1.95816	2.40511	3.07553	3.11278	0.133113	-0.202099	-2.21337	-2.06439	-5.37927	-5.34202	7.91749	7.91749	3.07553	0	-0.264646	0.605586	-2.14285
3129	1H	Alta Tensao - principal	2014-05-02	-19.1124	-39.9828	0	-7.24862	4.71736	-3.0682	1.38069	-8.09237	5.29264	-2.72303	0.690345	-4.83241	2.37785	-6.2131	3.64349	-1.22728	0	-10.8469	7.05906	0	0	-4.39379	2.63221	0	8.47467	3.98743	3.83402	5.59824	5.44483	2.95192	2.37663	3.91073	3.87238	-0.231339	0.113833	-1.9572	-1.53532	-5.44728	-5.33222	8.61374	8.38417	3.8945	0	0.31694	-0.2176	-1.69127
3129	1I	Alta Tensao - principal	2014-05-02	-19.1124	-39.9828	0	-5.80388	6.27446	-1.99998	1.96077	-6.43132	6.78426	-1.49018	0.901954	-3.29409	2.98037	-4.19605	4.23526	-1.80391	0	-8.66457	9.3671	0	0	-3.54453	3.30269	0	8.61562	3.67448	3.55684	6.61564	5.59604	2.89017	2.4588	3.7137	3.75291	0.576466	-0.521565	-2.56076	-3.22743	-6.4823	-6.52152	8.70002	8.52438	3.61795	0	-0.294635	-1.21657	-2.89255
3129	1J	Alta Tensao - principal	2014-05-02	-19.1124	-39.9828	-0.0956473	-6.03025	6.07322	-1.8526	2.05174	-7.08442	6.61982	-2.16495	1.70035	-2.98486	3.84774	-5.13225	4.43339	-1.46217	0.0605265	-10.2578	10.2466	-0.0316607	0	-3.51043	3.89687	0.0239638	9.39734	3.03326	3.18944	7.05474	6.74239	1.70579	1.901	3.03326	3.26752	-0.0511691	0.0659613	-2.62804	-2.12047	-5.98577	-5.94673	9.26622	9.53079	3.11066	0	-0.681854	-0.117473	-2.35444
3129	1K	Alta Tensao - principal	2014-05-02	-19.1124	-39.9828	0.0224221	-5.39255	7.20315	-2.09648	3.04382	-5.62798	7.98792	-1.5079	2.69067	-2.44963	4.22099	-3.39136	4.49566	-1.70409	-0.0168169	-8.75803	11.7232	0.00731458	0	-2.98809	4.28982	-0.00669237	8.67734	2.83074	2.83074	5.69518	4.24334	1.61434	1.45738	2.83074	2.83074	0.201734	-0.347611	-2.50575	-2.70195	-6.42964	-6.50812	8.67734	8.67734	2.83074	0	-1.34634	-0.937584	-2.58995
3129	1L	Alta Tensao - principal	2014-05-02	-19.1124	-39.9828	0.0249671	-6.28119	5.69199	-2.78724	2.87978	-6.92033	6.45895	-1.89245	1.60151	-3.51159	3.51892	-5.04552	4.71198	-1.29592	-0.0176421	-10.1134	9.18525	0.00879333	0	-3.87765	3.62105	-0.00666207	8.71351	3.04649	3.0891	5.73087	4.53781	1.98126	1.64039	3.04649	3.00388	0.0638472	-0.0639803	-2.23705	-2.40748	-6.15709	-6.15709	8.67743	8.74611	3.06887	0	-0.48524	-0.264588	-2.32506
3165	2A	Alta Tensao - principal	2014-05-02	-19.1153	-39.9819	0	-4.85816	6.22841	-1.91005	2.3668	-5.68862	7.10039	-1.4533	1.66091	-2.90659	4.60902	-3.94466	5.81318	-1.2872	0	-7.84461	10.0572	0	0	-3.13548	4.22618	0	8.3057	2.94926	2.90774	5.06692	4.31951	1.99424	1.28835	2.86622	2.94926	0.208761	-0.331035	-1.45215	-1.70129	-5.81204	-5.81204	8.33508	8.26803	2.93107	0	-0.157457	0.104615	-1.55286
3165	2B	Alta Tensao - principal	2014-05-02	-19.1153	-39.9819	-0.0217219	-5.76121	6.65309	-2.01991	2.44413	-6.22887	7.5459	-1.50974	2.18904	-3.7205	4.44232	-4.91091	5.97285	-1.33968	0.0207928	-8.64276	9.9584	-0.00758122	0	-3.99618	4.63821	0.00589102	7.77643	2.67467	2.7597	5.35309	4.33274	1.65431	0.846535	2.67467	2.84473	0.0387552	-0.0462742	-1.91692	-2.34207	-7.48635	-7.44383	7.71739	7.84479	2.71408	0	-0.414138	-0.34011	-2.10898
3165	2C	Alta Tensao - principal	2014-05-02	-19.1153	-39.9819	0.0515242	-4.71239	7.55693	-1.07204	3.01773	-5.70113	8.09624	-0.622614	2.52337	-2.5102	5.21992	-3.85848	6.38843	-1.70124	-0.038361	-7.52119	12.1212	0.0177843	0	-2.96574	5.00462	-0.0159885	8.78487	3.03222	3.03222	5.00969	5.05464	1.23452	0.874977	3.07716	3.07716	0.335667	-0.698013	-2.271	-3.48445	-6.54055	-6.54055	8.78487	8.78487	3.03222	0	-0.545044	-0.184602	-2.72603
3165	2D	Alta Tensao - principal	2014-05-02	-19.1153	-39.9819	0	-4.5076	7.25509	-2.01769	2.70456	-5.10861	7.94196	-1.4596	2.18941	-2.91921	5.58084	-4.16416	6.61115	-1.41667	0	-7.03167	11.3176	0	0	-3.06269	5.33362	0	7.91508	2.84939	2.67768	5.72567	4.52364	1.64737	1.77615	2.80646	2.93525	0.0589739	-0.112744	-1.40063	-1.74407	-6.50924	-6.38046	8.01773	7.74986	2.78359	0	-0.109242	0.278682	-1.53335
3165	2E	Alta Tensao - principal	2014-05-02	-19.1153	-39.9819	0	-5.2959	6.98885	-2.08363	2.69136	-6.2943	8.24771	-1.73636	2.17045	-3.29908	4.86181	-5.12226	6.51135	-1.4325	0	-7.45548	9.8388	0	0	-3.63315	5.09719	0	7.34351	2.78556	2.82897	4.65215	4.60874	1.57011	1.30966	2.78556	2.87238	-0.122838	0.181025	-3.29169	-2.42351	-8.28373	-8.32713	7.31716	7.37827	2.80428	0	-0.703478	-0.190631	-2.90944
3165	2F	Alta Tensao - principal	2014-05-02	-19.1153	-39.9819	0	-3.84016	7.2003	-1.44006	2.79284	-4.84384	9.12038	-1.13459	2.53101	-2.05099	5.10567	-3.84016	6.10934	-1.52734	0	-5.87597	11.0174	0	0	-2.23983	4.93724	0	9.15124	3.78375	3.9583	5.61655	5.35472	2.73643	2.69279	3.74011	3.9583	-0.100049	0.249057	-2.58742	-2.89289	-6.16575	-6.16575	9.05834	9.32543	3.84446	0	-0.36257	0.776304	-2.70532
3165	2G	Alta Tensao - principal	2014-05-02	-19.1153	-39.9819	-0.0487023	-4.4178	6.64785	-2.00867	2.64625	-5.35695	8.077	-1.72284	2.56459	-1.88617	4.19789	-3.72364	4.81038	-0.987853	0.0329631	-7.00994	10.5004	-0.0186453	0	-2.51207	4.16512	0.011858	8.83946	3.36788	3.40872	5.94034	5.00119	2.59206	1.69374	3.36788	3.53121	0.101271	-0.22539	-2.06286	-2.26702	-5.98279	-5.98279	8.81377	8.87839	3.38412	0	-0.635895	-0.11615	-2.15223
3165	2H	Alta Tensao - principal	2014-05-02	-19.1153	-39.9819	-0.025184	-4.68717	7.10228	-2.04239	2.1265	-6.03198	8.22295	-1.77343	2.1265	-2.66997	5.17473	-3.20789	5.57817	-1.28034	0.0196428	-7.15305	10.8128	-0.00977311	0	-2.79248	5.11977	0.00716676	8.3359	3.27047	3.18082	5.64629	5.06354	2.10497	2.06015	3.22564	3.22564	-0.0915417	0.177419	-2.60184	-1.97427	-6.45695	-6.50178	8.39011	8.25348	3.2349	0	-0.663274	0.470544	-2.3722
3165	2I	Alta Tensao - principal	2014-05-02	-19.1153	-39.9819	-0.0465221	-4.47548	6.28056	-1.56502	2.56867	-5.27691	7.37726	-1.05886	2.31559	-2.57736	4.84642	-3.92714	5.69004	-1.05886	0.037839	-6.98533	9.75213	-0.0163742	0	-2.81857	4.731	0.0153685	7.42028	2.61169	2.61169	4.3411	4.13019	0.96665	1.30409	2.61169	2.65387	-0.0878644	0.165219	-2.74524	-2.02817	-6.03533	-6.03533	7.42028	7.42028	2.61169	0	-0.56276	0.465332	-2.45128
3165	2J	Alta Tensao - principal	2014-05-02	-19.1153	-39.9819	-0.0242197	-4.89057	7.03845	-1.91908	2.51662	-5.79494	8.37347	-1.78989	2.21516	-3.03877	4.62681	-4.41686	5.66037	-1.4023	0.0188454	-7.58924	10.8971	-0.00894403	0	-3.27134	4.59264	0.00600252	8.01671	2.9781	2.93503	4.39924	4.31311	1.94454	0.954039	2.93503	2.89197	0.221933	-0.337913	-1.4576	-2.66343	-6.28089	-6.23783	8.04402	7.97728	2.96047	0	-0.0615095	-0.261031	-1.98684
3165	2K	Alta Tensao - principal	2014-05-02	-19.1153	-39.9819	0	-4.4381	6.82152	-2.01358	3.20529	-5.38325	8.54745	-1.84921	3.04092	-2.34233	4.76685	-3.53404	5.95856	-1.31499	0	-6.75824	10.3877	0	0	-2.76564	4.64718	0	8.90185	3.31313	3.35423	5.49109	4.46375	2.08033	1.0119	3.27204	3.31313	0.148934	-0.303094	-2.23449	-2.8098	-7.33008	-7.33008	8.87718	8.93976	3.32933	0	-0.697678	-0.0513739	-2.44867
3165	2L	Alta Tensao - principal	2014-05-02	-19.1153	-39.9819	-0.0218724	-4.6504	7.02906	-1.66565	3.00613	-5.5588	8.197	-1.7089	2.70333	-2.22799	5.51505	-3.87177	6.89928	-1.27633	0.0213848	-7.21529	10.8764	-0.00654076	0	-2.99185	5.38971	0.00684581	8.63961	2.5836	2.5836	5.006	3.92457	1.3724	1.41566	2.5836	2.5836	0.0746813	-0.184862	-2.95332	-2.26121	-8.31722	-8.44699	8.63961	8.63961	2.5836	0	-1.33242	0.00315049	-2.7041
3165	2M	Alta Tensao - principal	2014-05-02	-19.1153	-39.9819	-0.0228915	-5.72999	6.30119	-2.45227	2.21368	-6.73259	7.57372	-2.25946	1.98231	-3.33918	4.41168	-4.80452	5.56853	-1.64247	0.01567	-8.99756	9.87579	-0.00891177	0	-3.49324	4.26898	0.0041092	9.4084	3.66274	3.66274	6.28492	5.24376	2.89151	2.35165	3.7013	3.66274	-0.11629	0.153641	-1.58163	-1.813	-6.36325	-6.44037	9.4084	9.4084	3.66274	0	-0.270348	0.396233	-1.68888
3306	3A	Alta Tensao - Estrada Latrina	2014-05-03	-19.1165	-39.9834	-0.0240747	-5.70947	6.05342	-1.55325	2.21088	-6.17999	6.99445	-1.12195	1.46589	-1.55325	2.60297	-3.31769	3.81847	-1.16115	0.015135	-8.83145	9.34646	-0.0102375	0	-2.57017	3.1208	0.00620197	8.42613	3.56413	3.60334	6.15197	5.91671	2.30942	2.30942	3.60334	3.60334	-0.278413	0.466571	-2.04285	-2.31732	-5.29725	-5.29725	8.39677	8.45737	3.58313	0	-1.29533	-0.71942	-2.17069
3306	3C	Alta Tensao - Estrada Latrina	2014-05-03	-19.1165	-39.9834	-0.0238402	-5.65972	5.44126	-2.07325	2.62332	-6.89791	6.46596	-1.60359	2.28175	-2.84178	2.96488	-4.37884	4.37386	-1.47551	0.0188558	-8.82624	8.46493	-0.00855515	0	-3.38266	3.49014	0.0051804	8.22488	2.97326	2.93056	5.10806	4.59571	1.99125	1.77777	2.93056	2.93056	-0.271641	0.283408	-1.8514	-1.72331	-6.37718	-6.50527	8.25873	8.19223	2.95153	0	-0.827546	-0.464684	-1.78724
3306	3D	Alta Tensao - Estrada Latrina	2014-05-03	-19.1165	-39.9834	0	-5.6619	6.09083	-1.62994	2.31623	-6.47687	7.07737	-1.80151	1.41547	-3.25988	3.00252	-4.54668	4.54668	-1.54415	0	-8.87691	9.5494	0	0	-3.38882	3.49074	0	8.40001	3.25283	3.29572	5.44038	4.96856	2.26629	1.58	3.29572	3.29572	-0.178624	0.164522	-2.02303	-2.15171	-5.71184	-5.75474	8.36761	8.43486	3.27349	0	-0.363434	-0.567798	-2.08737
3306	3E	Alta Tensao - Estrada Latrina	2014-05-03	-19.1165	-39.9834	0	-5.70706	5.84625	-2.45914	3.15512	-7.00623	7.05262	-2.31994	1.94875	-1.90235	2.87673	-3.8511	3.8511	-1.20637	0	-8.8358	9.05131	0	0	-2.48788	3.1548	0	9.0685	4.05742	4.05742	6.42376	6.05257	2.89745	2.66546	4.01102	4.01102	-0.443267	0.670306	-2.62401	-2.20642	-5.08315	-5.08315	9.0685	9.0685	4.05742	0	-1.0985	-0.150654	-2.41522
3306	3F	Alta Tensao - Estrada Latrina	2014-05-03	-19.1165	-39.9834	-0.0237387	-5.66147	6.46819	-1.81756	2.92326	-6.81464	7.70679	-1.26233	2.06906	-2.20195	3.22223	-3.39784	4.63166	-1.09149	0.0189714	-8.1938	9.34325	-0.0105695	0	-2.8508	3.71006	0.00706133	7.97621	3.49165	3.61978	5.07193	4.68753	2.50932	2.08222	3.53436	3.61978	-0.138706	0.202975	-2.44505	-2.27421	-6.37438	-6.37438	7.88991	8.07516	3.55134	0	-1.39005	-0.65442	-2.37261
3306	3G	Alta Tensao - Estrada Latrina	2014-05-03	-19.1165	-39.9834	-0.0503084	-4.89226	7.42878	-1.60665	2.37067	-6.05952	8.37988	-1.30403	2.15451	-1.2608	4.48903	-3.37915	5.18073	-0.82848	0.0361551	-6.70143	10.1425	-0.0270914	0	-2.24975	4.59878	0.0115638	8.14997	4.38881	4.38881	5.72899	5.68576	3.39447	3.04862	4.30234	4.34557	-0.236992	0.843802	-2.09596	-1.53394	-5.85712	-5.85712	8.14997	8.14997	4.38881	0	-1.10485	0.466519	-1.87333
3306	3H	Alta Tensao - Estrada Latrina	2014-05-03	-19.1165	-39.9834	0	-5.68538	6.17269	-1.90866	2.39598	-6.01025	7.18794	-1.42134	1.86805	-2.27415	3.85793	-3.81732	4.99501	-1.2589	0	-8.43232	9.1551	0	0	-2.6703	3.92235	0	8.32448	3.93862	3.89801	5.56301	5.68484	2.76093	2.55788	3.93862	4.01984	-0.406636	0.689829	-2.35591	-1.21883	-5.23921	-5.1986	8.35335	8.29312	3.91914	0	-0.907039	0.581706	-1.86335
3306	3I	Alta Tensao - Estrada Latrina	2014-05-03	-19.1165	-39.9834	-0.0268098	-5.32871	6.08097	-1.46893	1.50014	-6.21942	7.39584	-0.875113	1.75463	-2.40206	3.79056	-3.84417	4.38437	-0.917528	0.0156053	-8.23039	9.37415	-0.0118844	0	-2.61371	3.80682	0.00725975	8.76682	3.84666	3.93149	6.26432	5.3736	3.42251	2.06522	3.93149	3.93149	-0.394859	0.623105	-2.4732	-2.26113	-5.10294	-5.10294	8.70582	8.83671	3.88619	0	-0.699884	0.54411	-2.37394
3306	3J	Alta Tensao - Estrada Latrina	2014-05-03	-19.1165	-39.9834	0	-6.38572	5.81265	-2.08764	2.12857	-7.0816	6.50853	-1.51456	1.51456	-4.01155	3.19286	-5.52611	4.01155	-0.982419	0	-10.7184	9.7565	0	0	-3.98683	3.39541	0	7.90447	2.74677	2.70584	5.36656	5.12095	1.88716	1.39595	2.74677	2.78771	-0.15955	0.126989	-2.04252	-2.24719	-4.98978	-4.90791	7.94044	7.87173	2.72534	0	-0.128824	-0.4604	-2.16111
3444	3A	Alta Tensao - Estrada Latrina	2014-05-04	-19.1163	-39.9838	-0.0222702	-6.08826	5.76437	-2.57637	2.97082	-6.84651	6.88179	-1.81812	1.77358	-2.736	3.13045	-4.57176	4.32768	-1.09978	0.0176377	-9.51287	8.98753	-0.00793001	0	-3.41387	3.48818	0.0083669	7.99498	2.84687	2.84687	5.5207	4.08402	2.00881	1.13084	2.80697	2.84687	-0.186123	0.212956	-2.85995	-3.1393	-6.41175	-6.33193	7.99498	7.99498	2.84687	0	-1.17345	-0.788698	-3.00372
3444	3B	Alta Tensao - Estrada Latrina	2014-05-04	-19.1163	-39.9838	0	-4.89547	6.56614	-1.55412	2.60314	-6.21646	7.80943	-0.971323	2.17576	-2.33117	3.41906	-4.19611	5.28399	-1.35985	0	-6.96098	9.33656	0	0	-2.92159	4.10266	0	7.65087	3.18279	3.14393	5.12543	5.08658	2.52229	1.90064	3.18279	3.18279	-0.236268	0.346526	-2.99482	-2.87826	-7.46291	-7.46291	7.67447	7.61922	3.16619	0	-1.1096	-0.835537	-2.94323
3444	3C	Alta Tensao - Estrada Latrina	2014-05-04	-19.1163	-39.9838	-0.0217866	-5.70643	6.57572	-1.72303	2.42635	-6.5778	7.61307	-1.43257	2.38485	-2.84336	3.46369	-4.87656	4.16908	-1.2666	0.0197072	-7.9753	9.17341	-0.0100113	0	-3.3911	3.75697	0.00693986	7.6471	3.45623	3.58071	5.15747	4.65955	2.41888	2.00394	3.49772	3.53921	-0.112238	0.136725	-2.43589	-2.43589	-6.95871	-6.91722	7.56649	7.74029	3.51396	0	-0.738221	-0.932871	-2.43589
3444	3D	Alta Tensao - Estrada Latrina	2014-05-04	-19.1163	-39.9838	-0.0457811	-6.75541	5.711	-1.95147	2.21723	-7.31123	6.74325	-1.67356	1.89961	-3.93657	3.28918	-5.40554	4.16262	-1.67356	0.0336227	-10.6264	8.94815	-0.016947	0	-4.09022	3.54556	0.0123061	8.03459	2.95274	2.99245	5.57307	4.89814	1.92049	1.64258	2.95274	2.99245	-0.302813	0.253014	-2.40702	-1.97029	-5.94049	-5.90078	8.00089	8.06323	2.9742	0	-0.522907	-0.399576	-2.15973
3444	3E	Alta Tensao - Estrada Latrina	2014-05-04	-19.1163	-39.9838	0.0219016	-5.92618	6.01129	-2.0434	2.21112	-6.83491	7.457	-1.91948	2.00459	-2.49777	3.3677	-4.39785	4.0699	-1.63034	-0.0194045	-8.69048	8.83359	0.00873336	0	-3.29994	3.65421	-0.00750946	7.79697	3.17068	3.04676	4.86423	4.78162	1.72497	1.68366	3.08807	3.08807	-0.299029	0.403175	-2.69478	-2.65348	-6.908	-6.908	7.88741	7.7055	3.10908	0	-1.31045	-0.844019	-2.67337
3444	3F	Alta Tensao - Estrada Latrina	2014-05-04	-19.1163	-39.9838	0	-5.59608	6.21358	-1.92968	1.58234	-6.40655	7.13982	-1.235	1.04203	-2.70156	3.82077	-4.32249	4.63124	-1.04203	0	-9.39816	10.4352	0	0	-2.91943	3.7906	0	8.52371	3.27498	3.31357	6.47825	6.09232	2.61889	2.38733	3.31357	3.39076	-0.159855	0.226081	-1.93516	-1.85798	-4.40516	-4.40516	8.493	8.55782	3.29327	0	-0.398485	0.303664	-1.8979
3444	3G	Alta Tensao - Estrada Latrina	2014-05-04	-19.1163	-39.9838	0	-3.8553	7.18852	-1.04414	2.08829	-4.97976	7.99171	-0.281115	1.96781	-0.562231	4.97976	-2.5702	5.66247	-1.2851	0	-6.04792	11.2769	-1.77636e-15	0	-1.69504	4.8093	0	7.40398	2.85765	2.89684	4.93485	5.17001	1.79945	1.76026	2.93603	2.97523	0.0357845	-0.316948	-2.86446	-2.59012	-5.05925	-5.09844	7.38252	7.444	2.87133	0	-1.60042	0.250605	-2.77881
3444	3H	Alta Tensao - Estrada Latrina	2014-05-04	-19.1163	-39.9838	0.0256556	-6.31483	5.37685	-1.50326	2.54386	-7.21419	6.54602	-1.09854	1.55457	-3.48185	3.03851	-4.96579	4.61239	-1.95294	-0.0193125	-9.72882	8.30313	0.00984423	0	-3.8415	3.36529	-0.00582723	7.95322	3.05171	3.05171	5.43501	5.07527	2.37719	1.97248	3.05171	3.14165	-0.096051	0.083821	-1.75987	-1.8498	-5.89692	-5.98686	7.95322	7.95322	3.05171	0	-0.499294	-0.31765	-1.80644
3444	3I	Alta Tensao - Estrada Latrina	2014-05-04	-19.1163	-39.9838	0.0279935	-6.75488	5.03757	-2.18863	1.57963	-7.3312	5.56956	-2.09997	0.160991	-3.38561	2.46628	-4.89291	3.75192	-1.52364	-0.016339	-11.6795	8.731	0.00927473	0	-3.5664	2.88272	-0.00854996	8.84594	2.90539	2.94972	6.36332	5.83133	1.57541	1.30942	2.94972	2.99405	-0.641214	0.467099	-2.90217	-2.54751	-5.20746	-5.16313	8.80193	8.87866	2.93082	0	-0.912399	-0.509377	-2.70179
3444	3K	Alta Tensao - Estrada Latrina	2014-05-04	-19.1163	-39.9838	0	-6.05458	5.13842	-2.03147	1.75264	-7.05039	6.13424	-1.47381	1.11532	-3.74428	2.90779	-5.09859	3.98327	-1.31448	0	-9.82412	8.33758	0	0	-3.8075	2.94115	0	8.47459	3.2565	3.29634	5.52697	5.08881	2.61918	2.38018	3.2565	3.29634	0.26905	-0.208943	-1.92175	-2.51924	-4.98887	-5.06854	8.43963	8.50426	3.27805	0	0.166777	-0.280613	-2.25718
3478	4A	Alta Tensao - Estrada Latrina	2014-05-04	-19.1162	-39.984	0	-6.72792	5.91241	-1.99799	2.12031	-7.29877	7.29877	-1.38636	1.26403	-3.66977	3.05814	-5.66776	4.64838	-1.34558	0	-12.6426	11.1101	1.77636e-15	0	-3.68401	3.26291	0	9.62296	3.09892	3.09892	6.56482	6.56482	1.95721	0.937831	3.05814	3.13969	-0.244651	0.203876	-2.20186	-3.13969	-4.32218	-4.32218	9.62296	9.62296	3.09892	0	-0.2586	-0.22666	-2.71711
3478	4B	Alta Tensao - Estrada Latrina	2014-05-04	-19.1162	-39.984	-0.0260993	-5.3197	5.54611	-1.77736	1.84457	-6.19533	7.01876	-1.61816	0.690327	-3.13062	3.51623	-4.80228	5.06849	-1.18034	0.0137022	-9.09997	9.46743	-0.00959003	0	-3.1315	3.38602	0.00692967	7.9603	2.90551	2.94531	5.61201	5.17419	2.14928	1.39305	2.94531	3.02491	0	0	-2.26868	-1.95027	-4.17916	-4.17916	7.92706	7.99507	2.92496	0	-0.00120084	0.163607	-2.11355
3478	4C	Alta Tensao - Estrada Latrina	2014-05-04	-19.1162	-39.984	0.0240524	-6.18071	6.46594	-2.14959	1.96057	-6.9316	7.37491	-1.51726	1.2492	-3.6909	3.65996	-4.6394	4.64798	-1.91246	-0.0154684	-9.70793	10.174	0.00967021	0	-3.75796	3.72844	-0.00827581	7.86513	3.16216	3.16216	4.90107	5.41484	1.77893	1.50229	3.08312	3.12264	0.119061	-0.118063	-2.52883	-2.88452	-5.01864	-5.05816	7.86513	7.86513	3.16216	0	-0.0681633	-0.309791	-2.70619
3478	4E	Alta Tensao - Estrada Latrina	2014-05-04	-19.1162	-39.984	-0.0453396	-6.16361	5.99398	-2.53212	1.61251	-7.30832	6.94133	-1.90056	0.902005	-4.07155	3.073	-5.76888	4.49402	-1.82161	0.0336057	-9.3767	9.08428	-0.0183842	0	-3.95647	3.47461	0.0140681	7.93444	3.23719	3.19772	5.36871	5.84239	2.09248	1.53986	3.23719	3.19772	-0.157463	0.118845	-2.32846	-2.5653	-6.11784	-5.881	7.96474	7.9048	3.21724	0	-0.0102593	-0.639742	-2.46191
3478	4F	Alta Tensao - Estrada Latrina	2014-05-04	-19.1162	-39.984	0.0219594	-6.11111	6.11494	-2.22282	1.90597	-6.6723	7.5981	-0.94009	1.70555	-3.1047	3.7499	-4.42752	4.87229	-1.26077	-0.018126	-9.58729	9.614	0.00739763	0	-3.47864	4.16089	-0.00705875	8.19087	2.73925	2.77934	5.42498	5.98617	1.69703	1.61686	2.77934	2.73925	-0.70809	0.855241	-3.03304	-2.19125	-6.76098	-6.76098	8.15936	8.22232	2.75931	0	-1.36531	-0.260296	-2.63291
3478	4G	Alta Tensao - Estrada Latrina	2014-05-04	-19.1162	-39.984	0	-5.66057	5.81672	-1.8348	2.22519	-6.51941	6.98787	-1.91288	1.24923	-3.00596	3.51345	-4.52845	4.48941	-1.63961	0	-8.73747	8.9785	-1.77636e-15	0	-3.49726	3.72926	0	8.00591	2.89188	2.89188	5.6636	5.46841	1.91592	1.29131	2.85284	2.93092	-0.0359995	0.0420773	-2.10503	-2.33926	-6.47733	-6.51637	8.00591	8.00591	2.89188	0	-0.703676	-0.484484	-2.22266
3537	6A	Alta Tensao - Estrada Latrina	2014-05-04	-19.1146	-39.9876	0	-4.76063	4.59647	-1.6416	1.57593	-5.3516	5.22027	-1.08345	1.24761	-2.52806	2.75788	-3.31602	3.8085	-1.24761	0	-7.18109	6.93347	0	0	-2.9081	3.0529	0	6.10959	2.16976	2.23543	4.23817	3.94268	1.21764	1.02064	2.16976	2.16976	-0.0628089	0.0685188	-1.60591	-1.44175	-5.6114	-5.48007	6.0592	6.15825	2.20317	0	-0.807059	-0.355568	-1.5295
3537	6C	Alta Tensao - Estrada Latrina	2014-05-04	-19.1146	-39.9876	-0.044259	-4.69999	5.05842	-1.42235	2.15324	-5.29592	5.61711	-0.938159	1.44557	-2.57697	2.33947	-3.50812	3.53134	-1.57134	0.0302326	-7.36378	7.89001	-0.0174224	0	-2.78301	2.75952	0.0111196	6.72737	2.63033	2.66757	4.97682	4.15741	1.36397	1.9599	2.55584	2.63033	0.0976127	-0.0886164	-1.69019	-1.69019	-4.44638	-4.59536	6.69943	6.75765	2.6482	0	-0.29797	-0.653055	-1.69019
3537	6D	Alta Tensao - Estrada Latrina	2014-05-04	-19.1146	-39.9876	0	-4.34968	4.87016	-2.0819	2.11908	-5.09322	6.28288	-1.78449	1.74731	-1.89602	2.60237	-2.89979	3.71768	-1.1153	0	-6.84332	7.66218	0	0	-2.32373	2.99189	0	7.1788	2.56888	2.60606	3.87007	3.72136	1.37923	2.12276	2.53171	2.60606	-0.219374	0.301101	-2.4128	-1.96668	-5.49848	-5.42412	7.15121	7.2097	2.58642	0	-1.15402	-0.490923	-2.21731
3537	6E	Alta Tensao - Estrada Latrina	2014-05-04	-19.1146	-39.9876	-0.0225838	-4.31761	5.31912	-1.3941	2.28734	-4.46198	6.11316	-0.924899	1.78205	-1.57457	3.08138	-2.8739	4.27244	-1.21364	0.0135089	-7.16574	8.80808	-0.00826519	0	-2.08024	3.29297	0.00598907	7.20422	2.62045	2.65655	4.42509	4.24462	0.563175	0.888009	2.58436	2.62045	-0.158677	0.310527	-2.21596	-1.45801	-4.30933	-4.30933	7.17746	7.23729	2.63659	0	-0.959329	-0.00364544	-1.91051
3537	6F	Alta Tensao - Estrada Latrina	2014-05-04	-19.1146	-39.9876	0	-4.60748	4.53434	-1.57239	1.60896	-5.41196	5.5948	-1.49926	1.31642	-2.1209	2.48658	-3.43733	3.9127	-1.24329	0	-6.97965	6.86886	0	0	-2.60196	2.73242	0	6.23327	2.43027	2.43027	3.89297	3.49072	0.601909	1.55266	2.43027	2.43027	0.0168326	-0.0197347	-2.1772	-2.83542	-4.91975	-4.95632	6.23327	6.23327	2.43027	0	-0.784926	-0.505119	-2.48502
3537	6G	Alta Tensao - Estrada Latrina	2014-05-04	-19.1146	-39.9876	0.0189841	-4.89496	4.49702	-2.00207	1.8419	-5.56865	5.84439	-1.40765	1.44561	-2.08133	1.92116	-3.7061	3.54593	-2.23985	-0.0206445	-6.6303	6.10538	0.00857978	0	-2.88582	2.69167	-0.00676624	6.39764	2.87069	2.91032	4.37658	4.09918	1.48369	1.12704	2.87069	2.87069	-0.0618217	0.0570641	-2.32065	-2.24139	-6.87794	-6.9572	6.36958	6.42332	2.89138	0	-1.18026	-1.03293	-2.28022
3537	6H	Alta Tensao - Estrada Latrina	2014-05-04	-19.1146	-39.9876	-0.0209881	-4.50852	5.2033	-1.32706	1.58649	-4.8769	5.80611	-1.09264	1.41904	-1.92986	2.7586	-3.13547	3.56234	-1.1931	0.012501	-7.042	8.11212	-0.00896114	0	-2.18468	3.04157	0.00440174	7.15693	3.07126	3.03778	5.01363	4.67874	1.66472	2.30102	3.07126	3.00429	-0.344619	0.492608	-2.01907	-0.913932	-4.22935	-4.26284	7.18114	7.12888	3.05575	0	-0.698526	-0.00259217	-1.50099
3175	8A	Alta Tensao - Estrada Latrina	2014-09-26	-19.057	-43.7104	0	-5.36249	5.58408	-1.28523	1.95	-5.71704	6.24886	-0.753408	1.77273	-2.17159	3.45681	-3.36818	4.60909	-1.55113	0	-8.46382	8.81357	0	0	-2.59398	3.51159	0	6.46661	2.43366	2.61093	3.89616	4.42797	1.32571	1.10411	2.52229	2.52229	-0.136793	0.217752	-2.70724	-3.41633	-4.34701	-4.3027	6.32954	6.60934	2.5205	0	-1.04415	0.044989	-3.00664
3175	8B	Alta Tensao - Estrada Latrina	2014-09-26	-19.057	-43.7104	-0.0598394	-6.14812	4.91097	-2.14064	1.8283	-6.88026	5.87431	-1.63971	1.4815	-2.68011	2.36777	-4.06732	3.7935	-1.56264	0.0557609	-8.63441	6.85676	-0.0267657	0	-3.27865	3.00424	0.0190849	7.32035	3.27434	3.27434	4.96981	4.73861	2.42661	1.733	3.27434	3.23581	-0.347801	0.307267	-2.77541	-1.92767	-6.62875	-6.82142	7.32035	7.32035	3.27434	0	-1.39524	-0.69045	-2.33472
3175	8C	Alta Tensao - Estrada Latrina	2014-09-26	-19.057	-43.7104	-0.0186435	-4.81991	6.14417	-2.13263	2.31033	-5.96648	6.75329	-1.34437	1.91619	-1.88182	3.88686	-2.9209	4.78262	-0.986062	0.0171868	-7.03857	8.95448	-0.00737678	0	-2.54608	4.18072	0.00544532	7.79299	3.09922	3.06339	5.53568	5.85815	2.34678	1.73767	3.09922	3.13505	-0.268832	0.555266	-2.56197	-1.80954	-7.14825	-7.18408	7.81593	7.76367	3.08349	0	-1.73478	-0.220516	-2.27614
3175	8D	Alta Tensao - Estrada Latrina	2014-09-26	-19.057	-43.7104	0	-5.62853	4.72468	-2.46505	1.8077	-6.7378	5.58744	-2.54722	1.68445	-3.32781	2.38288	-5.46419	3.49215	-1.93095	0	-8.96459	7.52502	0	0	-3.58632	2.79175	0	7.53909	2.60899	2.65007	5.15621	4.9097	1.37647	0.842373	2.60899	2.65007	-0.143647	0.102858	-2.15677	-2.19785	-5.77217	-5.64892	7.50351	7.56895	2.63133	0	-0.387239	-0.745159	-2.18183
3175	8E	Alta Tensao - Estrada Latrina	2014-09-26	-19.057	-43.7104	-0.0244914	-5.14501	5.13906	-2.219	1.86881	-6.04863	5.69844	-1.4875	1.18034	-3.20868	2.51425	-5.18804	3.58999	-1.53053	0.0185382	-8.19988	8.16847	-0.00849682	0	-3.25498	2.96521	0.00779538	7.44537	2.58303	2.58303	4.34725	4.30422	1.42124	1.55032	2.49697	2.58303	-0.386006	0.302467	-2.06416	-2.58051	-5.63561	-5.63561	7.44537	7.44537	2.58303	0	-0.425262	-0.906088	-2.3698
3137	8F	Alta Tensao - Estrada Latrina	2014-09-26	-19.057	-43.7104	0	-5.33142	5.28808	-2.77407	2.514	-6.02494	6.15498	-2.1239	2.34063	-3.3809	2.47066	-4.85463	3.03414	-2.38397	0	-8.49079	8.42176	0	0	-3.25938	2.5706	0	8.36749	3.51286	3.51286	4.85656	4.8999	3.20945	2.94938	3.42617	3.42617	0.175306	-0.128108	-1.68852	-3.33563	-4.59263	-4.67932	8.36749	8.36749	3.51286	0	0.328995	-0.697	-2.70213
3175	8H	Alta Tensao - Estrada Latrina	2014-09-26	-19.057	-43.7104	0	-4.82735	5.3692	-2.16738	1.87183	-5.71401	6.00956	-2.06887	1.92109	-2.90626	3.00478	-4.13773	3.84218	-1.72405	0	-7.10985	7.90789	0	0	-2.80646	3.03273	0	8.2028	3.9173	3.9173	5.73987	5.54283	2.68583	2.78435	3.86804	3.96656	-0.0726566	0.0751195	-2.48633	-2.97892	-5.1463	-5.1463	8.2028	8.2028	3.9173	0	0.122964	-0.026826	-2.74175
3175	8I	Alta Tensao - Estrada Latrina	2014-09-26	-19.057	-43.7104	0	-5.52204	4.99969	-2.76102	2.0148	-6.00709	5.59666	-2.3506	1.71631	-2.94758	2.05211	-5.33549	3.32069	-1.60438	0	-8.51125	7.70613	0	0	-3.3903	2.46127	0	8.3059	3.41814	3.41814	5.02252	4.57479	2.29881	2.07494	3.38083	3.38083	0.395943	-0.275657	-2.1039	-3.03668	-5.61114	-5.61114	8.3059	8.3059	3.41814	0	-0.0675375	-1.16617	-2.67884
3063	1A	Alta Tensao - Estrada Matinha	2014-05-01	-19.1015	-39.9833	0.025389	-6.41906	5.84761	-2.10794	2.91428	-6.8635	6.42539	-2.0635	2.95872	-3.17461	3.44761	-5.30794	4.3365	-1.44128	-0.0190554	-9.69064	8.84656	0.0103549	0	-3.63175	3.6615	-0.00679301	8.3276	3.34982	3.43871	4.99427	4.77205	2.14982	1.97205	3.34982	3.43871	-0.38351	0.41649	-2.4724	-2.02795	-6.16129	-6.25018	8.2572	8.39152	3.39641	0	-0.831129	-0.171691	-2.22811
3063	1B	Alta Tensao - Estrada Matinha	2014-05-01	-19.1015	-39.9833	0	-5.82222	6.22222	-2.08889	2.08889	-6.44444	6.84444	-1.95556	1.68889	-3.06667	3.6	-3.91111	4.75556	-1.6	0	-8.97297	9.58944	0	0	-3.31729	3.7743	0	8.32533	3.21422	3.392	6.01422	5.30311	2.05867	2.28089	3.25867	3.43644	-0.163556	0.192	-2.11911	-3.05244	-5.89689	-5.98578	8.19289	8.46687	3.30016	0	-0.74395	-0.297373	-2.54031
3063	1C	Alta Tensao - Estrada Matinha	2014-05-01	-19.1015	-39.9833	0	-6.40166	5.86819	-1.9399	2.13389	-6.69264	6.49866	-1.7944	2.13389	-4.02529	3.15233	-5.48021	4.02529	-1.64891	0	-11.0731	10.1504	0	0	-4.04549	3.40255	0	7.72059	2.48287	2.48287	5.58671	5.10173	1.51292	1.02795	2.53137	2.57987	-0.135989	0.106498	-1.7849	-2.12438	-4.64625	-4.69475	7.72059	7.72059	2.48287	0	-0.158891	-0.532949	-1.98062
3063	1E	Alta Tensao - Estrada Matinha	2014-05-01	-19.1015	-39.9833	0	-6.40166	5.86819	-1.9399	2.13389	-6.69264	6.49866	-1.7944	2.13389	-4.02529	3.15233	-5.48021	4.02529	-1.64891	0	-11.0731	10.1504	0	0	-4.04549	3.40255	0	7.72059	2.48287	2.48287	5.58671	5.10173	1.51292	1.02795	2.53137	2.57987	-0.135989	0.106498	-1.7849	-2.12438	-4.64625	-4.69475	7.72059	7.72059	2.48287	0	-0.158891	-0.532949	-1.98062
3414	2A	Alta Tensao - principal	2014-05-04	-19.1146	-39.9821	-0.0240319	-4.27354	6.89108	-1.83973	2.6802	-5.31661	7.77962	-1.45341	2.48704	-1.33752	4.45727	-2.96006	5.69349	-1.45341	0.0146001	-7.03021	11.3117	-0.00891502	0	-2.05183	4.47246	0.00675073	8.84372	3.28073	3.28073	5.13506	5.01916	2.08314	1.85135	3.28073	3.16483	-0.080251	0.267436	-2.62996	-2.20501	-5.33419	-5.37283	8.84372	8.84372	3.28073	0	-1.20274	0.237064	-2.48427
3414	2B	Alta Tensao - principal	2014-05-04	-19.1146	-39.9821	0.0264641	-4.73046	6.92182	-1.63191	1.90305	-5.73421	8.53656	-0.846366	1.42299	-2.15561	4.73975	-3.02844	6.31084	-1.76284	-0.0171774	-7.78287	11.4156	0.00931022	0	-2.57549	4.53578	-0.00689769	9.15658	3.22133	3.22133	6.14531	6.14531	2.08666	1.43203	3.22133	3.35226	0.122788	-0.269986	-2.14657	-2.88848	-5.94338	-5.94338	9.15658	9.15658	3.22133	0	-0.96889	0.0699588	-2.3866
3414	2C	Alta Tensao - principal	2014-05-04	-19.1146	-39.9821	0.0247068	-4.56056	6.08072	-2.3977	1.84151	-5.29593	7.55146	-2.26793	0.976366	-2.35444	3.70157	-3.9117	4.4802	-1.83535	-0.0185504	-7.14256	9.54798	0.00902884	0	-2.75089	3.8426	-0.00742266	8.00501	2.94392	2.90066	5.36632	4.76072	1.55969	1.60294	2.94392	2.90066	-0.0840872	0.132199	-2.20369	-2.63626	-5.96707	-6.01033	8.03415	7.9663	2.92534	0	-0.623705	-0.369221	-2.40494
3414	2E	Alta Tensao - principal	2014-05-04	-19.1146	-39.9821	0	-4.73834	5.62176	-1.84715	2.20855	-5.5013	6.5855	-1.16451	1.72668	-2.85104	3.97539	-4.21632	4.73834	-1.52591	0	-7.92718	9.40513	0	0	-3.03225	4.05804	0	8.19431	2.49224	2.49224	6.30701	5.94561	1.72928	1.56866	2.49224	2.57255	-0.318645	0.444308	-2.12564	-2.40673	-5.94041	-5.98057	8.19431	8.19431	2.49224	0	-0.558488	0.135475	-2.25799
3414	2F	Alta Tensao - principal	2014-05-04	-19.1146	-39.9821	-0.0259616	-4.74695	6.62634	-1.95727	2.2487	-5.64823	7.65637	-1.35642	2.16286	-3.07314	4.60919	-4.36069	6.28299	-1.27059	0.0169565	-7.72298	10.7552	-0.00945947	0	-2.98783	4.58736	0.00784356	7.39906	2.67807	2.72099	4.90981	4.52355	1.60512	1.21886	2.59223	2.76391	-0.240358	0.360495	-2.42918	-1.95708	-4.83259	-4.83259	7.37001	7.43974	2.69595	0	-0.0953189	0.390724	-2.23541
3414	2G	Alta Tensao - principal	2014-05-04	-19.1146	-39.9821	-0.0227047	-4.44622	6.85419	-1.84415	2.46785	-5.37553	8.00654	-1.28657	2.35633	-2.5876	4.88405	-4.59491	6.81702	-1.32374	0.0144677	-7.42001	11.414	-0.00783574	0	-2.77812	4.66487	0.00619766	7.03846	2.42908	2.42908	4.6966	4.58508	0.347425	0.793494	2.35474	2.35474	0.0128736	-0.0242988	-1.7714	-2.14313	-4.55933	-4.48499	7.03846	7.03846	2.42908	0	-0.156477	0.215961	-1.92128
3209	3A	Caixa dagua - areial	2014-05-02	-19.0782	-39.9708	-0.0239645	-4.53612	6.78765	-1.93295	1.92841	-5.62077	7.35167	-1.62925	1.62471	-2.23666	3.05645	-3.58162	4.96544	-2.01972	0.0194216	-6.36892	9.51068	-0.0115171	0	-2.50806	3.57209	0.0111753	7.5009	3.63954	3.55277	5.07128	5.20144	2.64166	1.68716	3.50938	3.42261	-0.0916662	0.125264	-3.04192	-4.12657	-5.9054	-6.07895	7.54952	7.42784	3.60487	0	-0.686996	-1.02322	-3.49786
3209	3B	Caixa dagua - areial	2014-05-02	-19.0782	-39.9708	0.0224097	-5.25916	5.14632	-1.71184	1.83549	-6.00804	6.36818	-2.22423	1.95373	-2.53955	3.05734	-4.15555	3.96388	-1.63301	-0.017005	-7.81567	7.66439	0.009489	0	-2.92039	3.20193	-0.0077907	7.4176	3.16082	3.1214	4.81623	4.57975	2.41194	2.45135	3.08199	3.1214	-0.268262	0.322959	-2.35724	-2.7908	-5.62866	-5.62866	7.44729	7.38866	3.14086	0	-0.760576	-0.173672	-2.57872
3209	3D	Caixa dagua - areial	2014-05-02	-19.0782	-39.9708	-0.0225836	-8.57823	6.12824	-2.33492	1.87353	-9.36443	6.82194	-2.05744	1.41107	-4.55477	2.75222	-6.45088	2.93721	-1.73371	0.0236632	-11.7289	8.36423	-0.0101855	0	-5.0322	2.87844	0.0118553	7.701	3.4463	3.49255	5.29617	4.83371	1.96641	2.56761	3.40006	3.40006	-0.345932	0.20903	-4.13817	-3.99943	-8.06914	-8.06914	7.66419	7.72738	3.47325	0	-1.3008	-2.66237	-4.04266
3209	3E	Caixa dagua - areial	2014-05-02	-19.0782	-39.9708	0	-5.54868	6.50535	-2.0664	2.83174	-6.50535	7.04108	-1.64547	2.71694	-2.4108	3.75014	-4.20934	5.58694	-1.33934	0	-8.33453	9.77151	0	0	-2.9823	4.17128	0	7.61508	2.98481	2.98481	4.51548	4.09454	1.64547	1.98987	2.90827	2.71694	-0.344401	0.535734	-3.29094	-3.21441	-6.39055	-6.23748	7.61508	7.61508	2.98481	0	-1.28069	-0.324082	-3.25805
3209	3F	Caixa dagua - areial	2014-05-02	-19.0782	-39.9708	-0.0237104	-7.12918	7.08176	-2.17688	2.25865	-7.3445	8.20141	-2.04769	1.78496	-2.99509	3.93813	-4.6315	5.48841	-2.30607	0.019353	-10.6616	10.5716	-0.00946852	0	-3.70053	4.14494	0.0116113	9.03367	3.6938	3.52155	5.54553	5.80391	2.66028	2.10046	3.65074	3.56461	0.334855	-0.440288	-4.18681	-4.70357	-7.37351	-7.37351	9.16262	8.90525	3.60751	0	-1.6144	-1.00903	-4.4239
4636	1A	Caixa dagua - estrada 1	2014-03-21	-19.0764	-39.9769	0.0239269	-4.99643	6.08155	-1.71868	2.26442	-6.11668	6.99434	-1.34526	1.60057	-3.00488	4.09	-4.29109	4.91981	-1.88464	-0.0175637	-7.56089	9.22302	0.00982155	0	-3.07328	4.0549	-0.00581697	7.99157	3.26165	3.30314	4.87978	5.25319	1.68501	2.30736	3.26165	3.26165	-0.140579	0.191345	-2.46405	-1.34381	-6.11522	-5.86628	7.96316	8.02602	3.2804	0	-0.264132	0.256276	-1.94287
4636	1B	Caixa dagua - estrada 1	2014-03-21	-19.0764	-39.9769	0	-5.6846	6.09953	-2.40662	1.82571	-6.47297	7.42732	-2.03318	1.2863	-4.10785	3.98337	-5.14518	5.0622	-2.19915	0	-8.64161	9.27238	0	0	-3.71453	3.83547	0	8.7117	3.89847	3.89847	5.43372	6.05612	3.23457	2.65366	3.85697	3.89847	-0.126395	0.122565	-2.28405	-2.36704	-5.47905	-5.35457	8.7117	8.7117	3.89847	0	0.69171	0.463868	-2.32588
4636	1C	Caixa dagua - estrada 1	2014-03-21	-19.0764	-39.9769	0.0405345	-4.82562	7.69944	-2.24444	1.60617	-5.9258	8.03796	-2.28676	1.22534	-2.62527	4.94901	-4.27554	5.83761	-1.56741	-0.0440943	-6.44882	10.3282	0.0190864	0	-3.1375	5.14183	-0.0108301	5.22895	2.47852	2.4362	3.3248	3.36712	1.5476	1.2514	2.4362	2.30926	-0.102664	0.193537	-1.0759	-1.83756	-5.73048	-5.68817	5.25088	5.1942	2.46215	0	-0.404745	-0.247199	-1.39709
4636	1D	Caixa dagua - estrada 1	2014-03-21	-19.0764	-39.9769	-0.0217858	-6.0079	4.3948	-2.21183	1.91275	-6.92042	5.27082	-2.02933	1.73025	-3.96386	2.42376	-4.87638	3.81079	-1.95632	0.0147149	-9.24277	6.74743	-0.00903124	0	-3.63734	2.67636	0.0068822	8.19146	3.22736	3.51936	3.99387	4.54138	2.67985	2.49734	3.30036	3.37336	-0.860725	0.526303	-2.64926	-2.53976	-5.56932	-5.53282	7.93262	8.38147	3.39575	0	-0.220738	-0.0320775	-2.58771
4636	1E	Caixa dagua - estrada 1	2014-03-21	-19.0764	-39.9769	-0.0234541	-6.14674	5.52715	-1.78555	1.56243	-6.80753	6.27604	-1.47718	1.60649	-4.60491	3.32453	-5.53001	4.20558	-1.47718	0.0205984	-9.39151	8.42426	-0.00826728	0	-4.45718	3.60066	0.00652363	7.24731	2.57775	2.5337	4.33985	4.64822	1.82886	2.00507	2.57775	2.5337	-0.153497	0.110818	-1.91559	-2.0918	-6.32084	-6.36489	7.28266	7.21543	2.55459	0	0.127888	-0.579508	-2.0158
2868	3A	Caixa dagua - estrada 1	2014-03-22	-19.079	-39.9761	0.0220146	-4.54949	4.93355	-1.22476	0.853198	-5.56958	5.8403	-1.30032	1.38213	-2.88713	3.30897	-4.92731	4.70687	-1.98038	-0.0157665	-7.32976	7.96868	0.00765287	0	-2.94671	3.37426	-0.00554372	6.60437	2.25955	2.33511	5.62206	5.50872	1.20168	1.31502	2.22177	2.29733	-0.15844	0.18159	-1.97193	-1.36743	-4.69217	-4.72995	6.54579	6.66769	2.29586	0	-0.211405	0.109243	-1.66311
2868	3B	Caixa dagua - estrada 1	2014-03-22	-19.079	-39.9761	0	-5.25713	4.15862	-2.00085	1.41236	-6.12024	5.17866	-1.76545	0.980807	-3.41321	2.86396	-4.62941	3.37398	-1.3339	0	-7.8996	6.24893	0	0	-3.32971	2.78939	0	6.54836	2.82129	2.82129	4.07672	3.84133	1.84048	1.48739	2.78206	2.78206	-0.0426651	0.0357995	-2.16121	-2.31814	-4.59361	-4.59361	6.54836	6.54836	2.82129	0	0.102777	0.379933	-2.25198
2868	3C	Caixa dagua - estrada 1	2014-03-22	-19.079	-39.9761	0.0266637	-4.3246	4.96936	-1.78988	1.42076	-5.71869	5.81427	-1.57866	1.37851	-2.25458	3.02608	-3.3952	4.1667	-1.74764	-0.0155816	-6.7321	7.75451	0.0115211	0	-2.18218	3.20496	-0.00633667	7.9991	3.43661	3.47885	4.74621	5.08417	2.50721	2.25374	3.43661	3.5211	-0.703429	0.944136	-2.39324	-1.29486	-4.67448	-4.67448	7.96837	8.03422	3.45632	0	-0.596174	0.593005	-1.901
2868	3D	Caixa dagua - estrada 1	2014-03-22	-19.079	-39.9761	0	-5.14635	5.26511	-1.62308	1.22721	-5.77974	5.70057	-1.42514	0.87092	-2.88987	2.41482	-4.23584	3.7212	-1.62308	0	-7.74403	7.92273	0	0	-2.87692	2.92325	0	7.42498	3.22873	3.22873	5.44561	5.8019	1.72441	2.19946	3.26831	3.42666	-0.45289	0.378443	-2.07597	-1.79886	-5.12419	-5.0846	7.42498	7.42498	3.22873	0	-0.437271	-0.468939	-1.92845
2868	3E	Caixa dagua - estrada 1	2014-03-22	-19.079	-39.9761	0	-5.01351	5.22241	-1.12804	1.50405	-5.68198	6.14155	-1.0027	1.58761	-3.04988	3.00811	-4.17792	4.01081	-1.12804	0	-8.51693	8.8718	0	0	-2.8106	3.12526	0	7.7888	2.94241	2.94241	6.45187	6.41009	1.85615	1.81437	2.81707	3.02597	-0.441707	0.435657	-2.02932	-1.94576	-3.99294	-3.99294	7.7888	7.7888	2.94241	0	-0.104941	0.157407	-1.98669
2868	3F	Caixa dagua - estrada 1	2014-03-22	-19.079	-39.9761	0	-4.8882	4.71669	-1.75804	1.54364	-5.78866	5.48851	-1.75804	1.28637	-3.13017	2.74425	-4.20214	3.17304	-1.58652	0	-8.23916	7.95006	0	0	-3.02109	2.84092	0	6.66377	2.24723	2.29011	4.13391	3.96239	1.47541	1.60405	2.29011	2.24723	-0.411263	0.360559	-2.55521	-2.42657	-4.18461	-4.14173	6.62699	6.69926	2.26906	0	-0.193114	-0.267754	-2.48192
2868	3G	Caixa dagua - estrada 1	2014-03-22	-19.079	-39.9761	0	-5.5802	5.08116	-1.72396	1.54249	-5.9885	5.53483	-1.22492	1.40639	-3.03962	2.99425	-4.08307	3.99234	-1.36102	0	-8.8021	8.01492	0	0	-3.31759	3.20634	0	6.80478	2.40413	2.40413	4.49104	4.2642	1.13385	0.907008	2.4495	2.4495	-0.0457086	0.0450263	-2.45018	-2.08724	-5.26297	-5.2176	6.80478	6.80478	2.40413	0	-0.686254	-0.408081	-2.26667
2868	3H	Caixa dagua - estrada 1	2014-03-22	-19.079	-39.9761	0	-5.99573	5.05354	-2.22699	1.67024	-6.38117	5.48181	-1.75589	1.02784	-3.25483	2.31264	-4.53962	3.64027	-2.44112	0	-9.68541	8.16342	0	0	-3.58648	3.00046	0	7.05849	2.26191	2.26191	4.6602	3.63236	0.762973	0.762973	2.39039	2.26191	-0.35052	0.249053	-2.36337	-1.97793	-5.53254	-5.53254	7.05849	7.05849	2.26191	0	-0.870116	-0.904714	-2.14946
3135	7A	Caixa dagua - principal	2014-09-26	-19.0789	-39.9743	0.0198578	-4.53863	6.17382	-2.2214	2.03319	-5.26039	7.04753	-1.3097	1.42539	-2.41134	4.7303	-3.47498	5.45206	-1.38568	-0.0181296	-6.75852	9.21451	0.007347	0	-2.73687	4.71772	-0.00764719	6.63251	2.4539	2.4539	4.58119	4.20132	1.99805	0.744465	2.41591	2.4539	-0.20522	0.402578	-2.59843	-2.48446	-6.01729	-6.05528	6.63251	6.63251	2.4539	0	-0.937661	0.452881	-2.55416
3135	7B	Caixa dagua - principal	2014-09-26	-19.0789	-39.9743	0	-5.20211	5.80525	-2.1487	2.33718	-6.44609	6.67227	-1.73404	2.03561	-2.60105	4.48587	-3.99582	5.57907	-2.1487	0	-7.8588	8.76996	0	0	-2.63319	4.32475	0	7.25355	3.29543	3.25773	4.6902	4.6902	1.71218	1.4483	3.25773	3.29543	-0.511909	0.882858	-2.50982	-1.79359	-4.28155	-4.50773	7.28047	7.22352	3.27761	0	-0.557944	1.27733	-2.21092
3135	7C	Caixa dagua - principal	2014-09-26	-19.0789	-39.9743	-0.0219849	-6.18007	4.83771	-1.46876	1.53608	-6.40265	5.80222	-1.61715	0.75705	-4.17684	2.90867	-5.17845	3.98448	-2.58167	0.015112	-10.7896	8.42595	-0.00615859	0	-4.21639	3.09524	0.00880551	6.44158	1.80447	1.80447	4.36415	3.91899	0.877046	0.765755	1.80447	1.80447	-0.087473	0.0609145	-2.202	-2.86974	-4.4649	-4.42781	6.44158	6.44158	1.80447	0	-0.170971	-0.447334	-2.58001
3135	7D	Caixa dagua - principal	2014-09-26	-19.0789	-39.9743	-0.0489967	-5.06961	5.92595	-1.33527	2.73101	-5.65051	6.88028	-0.837358	2.15012	-3.16095	4.34923	-3.90782	4.63968	-1.83318	0.0339887	-8.04608	9.3622	-0.0184272	0	-3.16539	4.30098	0.0141992	7.08002	2.68179	2.6403	4.21702	4.25852	1.52	1.56149	2.59881	2.59881	-0.13971	0.192231	-2.08987	-2.00688	-4.91137	-4.91137	7.1102	7.04451	2.66273	0	-0.151315	0.557584	-2.05179
3135	7I	Caixa dagua - principal	2014-09-26	-19.0789	-39.9743	0	-5.74401	5.9477	-1.91467	1.91467	-5.9477	7.04762	-1.30361	1.8332	-2.44426	4.35893	-4.23672	5.6218	-1.79246	0	-8.57668	8.88081	0	0	-3.03697	4.36503	0	7.5455	3.14583	3.14583	5.0605	5.0605	1.96443	2.37181	3.2273	3.2273	-0.439089	0.783042	-2.31302	-1.53901	-5.77572	-5.77572	7.5455	7.5455	3.14583	0	-1.05873	0.771824	-1.98039
3135	7J	Caixa dagua - principal	2014-09-26	-19.0789	-39.9743	-0.0641692	-5.57211	5.69413	-1.85842	1.81354	-6.07283	6.69558	-1.48288	1.6049	-3.40232	3.89988	-4.61239	4.69269	-1.77497	0.0610113	-7.99021	8.11223	-0.0265726	0	-3.54491	3.97192	0.0273407	6.80194	2.79616	2.83789	4.42351	4.38178	1.50263	1.83644	2.75443	2.79616	-0.291627	0.334275	-2.37797	-3.42114	-6.50893	-6.4672	6.77258	6.83222	2.8167	0	-0.53747	-0.00695927	-2.89812
3135	7N	Caixa dagua - principal	2014-09-26	-19.0789	-39.9743	-0.0231078	-4.50847	6.28681	-1.42954	1.9915	-5.00262	6.89499	-0.669304	1.72542	-2.75994	4.69032	-3.71023	5.71664	-1.39152	0.0149037	-7.74293	10.7716	-0.00725974	0	-2.83523	4.61644	0.00634611	7.37139	2.31586	2.31586	5.28076	5.05269	1.32756	1.4796	2.31586	2.31586	-0.154895	0.263232	-1.97945	-2.09348	-4.75429	-4.75429	7.37139	7.37139	2.31586	0	-0.299457	0.432894	-2.02441
3280	2A	Estrada do Alagado	2014-05-03	-18.0892	-39.9775	0.0636766	-5.2916	4.72044	-1.48858	1.49951	-6.10653	5.65179	-1.29455	1.26667	-3.89457	2.50848	-4.6707	3.63386	-1.99306	-0.0527425	-8.17479	7.34735	0.0223497	0	-3.7588	2.95336	-0.0168509	7.3228	2.54962	2.58843	6.11981	4.99442	1.65708	1.50185	2.51082	2.54962	-0.283242	0.182435	-2.06833	-1.8355	-6.1042	-6.06539	7.29087	7.35104	2.57022	0	0.0290239	-0.615293	-1.93785
3280	2B	Estrada do Alagado	2014-05-03	-18.0892	-39.9775	-0.0222222	-6.11489	4.46106	-1.74656	1.28061	-6.57472	5.1508	-1.47833	1.08902	-3.39427	2.89	-4.19896	3.46478	-1.59329	0.0160965	-9.72447	7.078	-0.00802238	0	-3.5833	2.92118	0.00831373	6.5111	2.37268	2.33436	3.98207	3.48392	1.52967	1.41472	2.37268	2.33436	-0.0413935	0.0352439	-2.22556	-2.60874	-4.71627	-4.71627	6.54625	6.48537	2.35056	0	-0.554475	-0.108206	-2.43592
3280	2C	Estrada do Alagado	2014-05-03	-18.0892	-39.9775	-0.0513627	-5.82193	5.71921	-1.71942	1.57161	-6.36292	6.80119	-1.89975	1.21095	-2.93665	3.60033	-4.01863	4.59214	-1.80958	0.0388025	-9.14012	8.93529	-0.0187679	0	-3.27083	3.78977	0.0157339	7.13941	2.58607	2.63115	4.20904	3.44264	1.32376	0.918015	2.54099	2.54099	-0.344297	0.422107	-2.10252	-2.28285	-5.39354	-5.39354	7.10391	7.17451	2.60874	0	-0.887348	-0.0945589	-2.18701
3280	2D	Estrada do Alagado	2014-05-03	-18.0892	-39.9775	0	-6.15365	4.44651	-1.66744	1.78654	-6.31246	5.35963	-1.58804	1.54834	-4.0495	2.89817	-5.12143	4.0892	-2.18355	0	-10.2561	7.41085	3.55271e-15	0	-4.23453	2.99048	0	6.23623	1.86912	1.86912	4.37028	3.69537	1.27361	0.678093	1.90882	1.86912	0.16198	-0.115927	-1.78337	-2.18038	-4.60214	-4.68154	6.23623	6.23623	1.86912	0	-0.173815	-0.275925	-2.00412
3280	2E	Estrada do Alagado	2014-05-03	-18.0892	-39.9775	-0.020529	-6.10693	4.50716	-1.39368	1.2784	-6.73784	5.28652	-1.57924	0.536154	-3.69464	2.83711	-4.65955	3.54224	-3.06373	0.0165832	-9.90578	7.29298	-0.00632033	0	-3.93404	3.00013	0.00655373	7.18515	2.21212	2.21212	5.66355	5.14398	1.2472	0.801852	2.175	2.21212	-0.125954	0.0967197	-2.16712	-2.3898	-5.76701	-5.80412	7.18515	7.18515	2.21212	0	-0.632391	-0.478126	-2.29381
3280	2F	Estrada do Alagado	2014-05-03	-18.0892	-39.9775	0	-5.17188	3.56035	-1.31171	1.68648	-5.9589	4.57224	-1.31171	1.31171	-3.44792	2.36107	-4.19747	3.52287	-1.94882	0	-7.40139	5.09516	0	0	-3.47516	2.53545	0	4.85344	1.81777	1.93021	3.4293	3.24191	0.768407	0.955794	1.85525	1.89273	-0.355914	0.243724	-2.11735	-1.81753	-5.00311	-5.00311	4.75814	4.91904	1.88436	0	-0.419928	-0.0656526	-1.95434
3280	2G	Estrada do Alagado	2014-05-03	-18.0892	-39.9775	0	-6.6598	5.05503	-2.56763	1.76525	-7.58254	5.37598	-2.32692	1.36405	-4.69395	3.00894	-5.85741	3.45026	-2.32692	0	-11.0362	8.3769	0	0	-4.79379	3.25338	0	6.24795	1.63423	1.63423	3.4396	2.91805	1.07256	0.751609	1.63423	1.59411	-0.171134	0.109701	-2.05674	-1.65555	-5.50699	-5.38664	6.24795	6.24795	1.63423	0	-0.332941	-0.868051	-1.80426
3280	2H	Estrada do Alagado	2014-05-03	-18.0892	-39.9775	0	-6.13933	5.40408	-1.91165	0.992587	-6.58048	6.21286	-1.91165	0.5882	-3.86006	3.86006	-5.03646	3.8233	-2.16899	0	-10.5584	9.29393	-3.55271e-15	0	-4.02135	3.86522	0	6.52534	1.96679	2.00355	3.98873	3.69463	0.863918	0.606581	1.96679	2.00355	0.0551437	-0.0551437	-1.81974	-1.89327	-4.2093	-4.31959	6.49171	6.55494	1.98634	0	-0.201918	0.202982	-1.86154
3280	2I	Estrada do Alagado	2014-05-03	-18.0892	-39.9775	0.0197957	-5.65289	5.29249	-1.72565	1.36524	-6.19835	5.94703	-1.50747	1.07433	-3.94381	3.54705	-4.88926	4.0925	-2.12564	-0.0165677	-8.80354	8.26019	0.00675728	0	-3.8935	3.6439	-0.0059571	6.51278	2.18554	2.25827	4.22189	3.89462	1.05827	1.131	2.18554	2.29463	-0.287171	0.25828	-1.95989	-1.95989	-5.45077	-5.45077	6.45416	6.56754	2.22315	0	-0.198154	-0.13558	-1.95989
3280	2J	Estrada do Alagado	2014-05-03	-18.0892	-39.9775	0.0241302	-5.04625	5.60548	-1.78391	1.71426	-5.95027	6.31297	-1.94113	1.59634	-3.35612	4.03327	-4.45667	4.97659	-2.05905	-0.015175	-8.36127	9.30898	0.00851841	0	-3.15185	3.99768	-0.00541449	6.44277	2.23711	2.31572	3.96654	3.41627	1.01865	0.861429	2.23711	2.27642	-0.357034	0.429071	-1.5755	-1.30036	-3.97312	-4.05173	6.38089	6.5113	2.27442	0	-0.13088	0.494307	-1.44567
3280	2K	Estrada do Alagado	2014-05-03	-18.0892	-39.9775	-0.0187541	-5.87281	4.53852	-1.83425	1.42624	-6.76204	5.7612	-1.61195	1.35213	-3.94616	3.01943	-4.76128	4.01981	-2.46412	0.018297	-8.47661	6.5364	-0.00739747	0	-3.93955	3.18415	0.00661724	5.68248	2.19969	2.27379	3.49647	3.49647	1.08816	0.86585	2.16264	2.34789	-0.356834	0.273033	-2.24644	-1.80182	-5.39577	-5.54398	5.62228	5.72914	2.24143	0	-0.341517	-0.0686083	-2.00502
2942	1A	Estrada do Alagado	2014-09-26	-19.0903	-39.9742	-0.0420277	-5.24629	6.23067	-2.21334	2.06036	-5.59095	7.12676	-1.69636	1.47445	-3.48856	4.61079	-4.76378	5.81708	-1.48957	0.026903	-9.21451	10.8992	-0.0124292	0	-3.53472	4.48465	0.00918884	7.29181	2.15647	2.15647	5.0171	4.94816	1.50163	1.67396	2.12201	2.12201	-0.0148449	0.0196204	-1.22113	-2.0483	-4.66767	-4.66767	7.29181	7.29181	2.15647	0	-0.0585076	0.23586	-1.59426
2942	1B	Estrada do Alagado	2014-09-26	-19.0903	-39.9742	0.0231178	-5.47151	6.88193	-2.06105	2.22097	-6.1915	7.56403	-1.68211	1.87992	-3.87997	5.59354	-5.31994	6.57878	-2.25052	-0.0147762	-9.6775	12.1978	0.00662333	0	-3.64766	5.4757	-0.00436149	7.28211	2.05274	2.12853	4.59164	4.36428	1.44644	1.78748	2.09063	2.09063	-0.372477	0.53698	-1.5093	-1.20615	-4.38924	-4.6545	7.2226	7.35681	2.08635	0	-0.189079	0.745469	-1.37387
2942	1C	Estrada do Alagado	2014-09-26	-19.0903	-39.9742	-0.0536212	-7.27558	6.39913	-2.74583	2.55312	-8.30118	8.02301	-2.7031	1.82665	-5.39531	4.47613	-7.10465	6.05727	-2.8313	0.0318458	-13.4819	11.807	-0.0143697	0	-5.20416	4.43626	0.0109941	10.8583	2.90986	2.90986	6.62767	6.32853	2.39705	1.92699	2.86712	2.86712	0.0467126	-0.0387544	-1.83356	-2.56003	-6.06418	-6.44878	10.8583	10.8583	2.90986	0	0.256979	0.0248223	-2.22631
2942	1D	Estrada do Alagado	2014-09-26	-19.0903	-39.9742	-0.0202387	-5.70431	5.31296	-2.30088	1.52358	-6.61657	6.75152	-1.95002	0.786759	-4.33592	4.01475	-5.24818	5.45331	-2.05528	0.0148482	-10.5449	9.7972	-0.00415484	0	-4.45015	4.00357	0.00607447	7.30616	1.48174	1.51683	4.46413	3.7273	0.744921	0.394052	1.51683	1.55192	0.218618	-0.202424	-1.67607	-2.72868	-5.25493	-5.36019	7.27264	7.33743	1.4999	0	-0.0186281	-0.182784	-2.19288
2942	1E	Estrada do Alagado	2014-09-26	-19.0903	-39.9742	-0.0393514	-5.3404	5.65044	-2.12443	1.86903	-6.04721	6.92269	-1.34694	0.844157	-3.75009	4.37819	-5.02234	5.57976	-1.59433	0.0313292	-8.966	9.44301	-0.0108697	0	-3.81493	4.34975	0.0103027	7.20131	2.00629	1.97095	4.72749	4.48011	1.37016	0.981417	2.04163	2.04163	-0.114133	0.133249	-1.63377	-2.16387	-5.73324	-5.73324	7.23002	7.17082	1.98915	0	-0.19159	0.187613	-1.8854
2942	1F	Estrada do Alagado	2014-09-26	-19.0903	-39.9742	-0.0174533	-5.09072	6.48827	-2.01692	2.19091	-5.83679	7.08513	-1.12164	1.68358	-3.15094	3.86211	-4.22528	5.7422	-1.83786	0.0123894	-8.67617	11.0382	-0.00513832	0	-3.29457	4.29406	0.00528459	7.53984	2.37704	2.01893	4.01839	4.82415	1.63097	1.42207	2.25767	2.22783	-0.0402248	0.0493035	-2.30828	-2.24859	-5.17318	-5.35224	7.80763	7.19791	2.21975	0	-0.343444	-0.478635	-2.28294
2942	1G	Estrada do Alagado	2014-09-26	-19.0903	-39.9742	-0.0379662	-4.66183	6.37809	-1.79432	2.18436	-5.91637	7.91938	-1.07744	1.00151	-3.22807	2.82955	-4.30339	3.04461	-2.47535	0.0337216	-7.09656	9.66777	-0.0134875	0	-3.22286	3.10744	0.0090605	7.78308	2.76493	2.76493	5.48907	5.30985	1.79715	1.79715	2.80078	2.80078	-0.210111	0.184172	-2.10984	-1.67971	-6.80539	-6.91292	7.78308	7.78308	2.76493	0	-0.200892	-2.22421	-1.8574
2942	1H	Estrada do Alagado	2014-09-26	-19.0903	-39.9742	0	-4.56445	7.05414	-1.84841	2.33881	-5.62068	8.44988	-0.98079	2.03703	-2.8292	5.05484	-3.96088	6.63919	-1.88613	0	-7.40408	11.4427	0	0	-2.89412	5.17328	0	7.67233	2.57976	2.57976	5.37124	5.33352	2.12709	1.71214	2.65521	2.57976	-0.324884	0.58046	-1.90924	-1.87151	-5.49289	-5.60606	7.67233	7.67233	2.57976	0	-0.415774	0.397159	-1.89514
2942	1I	Estrada do Alagado	2014-09-26	-19.0903	-39.9742	0	-5.27894	5.19896	-1.27974	1.83963	-6.43871	6.39872	-1.19976	1.79964	-3.19936	2.43951	-5.39892	4.35913	-2.03959	0	-7.19289	7.08391	1.77636e-15	0	-3.11878	3.20905	0	5.98717	2.8278	2.8678	3.78761	3.54766	2.26792	2.02796	2.74782	2.74782	-0.771477	0.588251	-2.53113	-2.01123	-5.81047	-5.81047	5.95972	6.01421	2.84795	0	-0.707012	-0.453828	-2.24348
3240	1A	Estrada Esmeralda	2014-05-03	-19.0986	-40.0021	0.0210717	-4.30175	6.33615	-1.70806	1.93815	-5.05354	7.87733	-1.70806	1.59984	-2.19672	4.38148	-3.85067	6.07302	-1.896	-0.016518	-6.15663	9.08592	0.00971615	0	-2.37044	4.57047	-0.00537765	6.89045	3.13148	3.24424	4.8606	4.71024	2.15414	2.45486	3.09389	3.16906	-0.552319	1.10163	-2.0935	-1.22893	-5.3638	-5.40139	6.82496	6.98654	3.17718	0	-0.714194	0.841248	-1.75849
3240	1B	Estrada Esmeralda	2014-05-03	-19.0986	-40.0021	0	-5.3604	5.21453	-2.07852	2.80783	-6.49082	6.63668	-1.42215	1.96913	-3.17248	3.17248	-4.81342	5.03221	-2.66197	0	-8.22544	8.00161	-3.55271e-15	0	-3.44127	3.21651	0	7.51185	2.99015	2.99015	4.81342	4.63109	2.26085	1.89619	2.95369	2.95369	0.182326	-0.182326	-1.16689	-3.09955	-5.39686	-5.46979	7.51185	7.51185	2.99015	0	-0.0386768	-0.251396	-2.11174
3240	1C	Estrada Esmeralda	2014-05-03	-19.0986	-40.0021	0	-5.50845	6.41395	-2.18829	2.15056	-5.92347	7.28172	-1.811	2.18829	-2.33921	3.84837	-3.69746	5.28208	-2.22602	0	-8.4326	9.81878	0	0	-2.8102	4.0145	0	6.85152	2.73904	2.77677	4.3614	3.94638	1.60717	1.07896	2.70131	2.73904	-0.128371	0.211191	-2.73168	-2.61849	-5.10862	-4.9577	6.82483	6.88259	2.75647	0	-1.03112	-0.116689	-2.68507
3240	1D	Estrada Esmeralda	2014-05-03	-19.0986	-40.0021	0	-5.20965	5.76782	-1.71174	2.56761	-6.10273	6.84696	-1.78616	2.49319	-2.90252	3.90724	-4.46541	4.87474	-1.8978	0	-8.12301	8.99333	0	0	-3.35511	3.98224	0	7.12819	2.32787	2.29066	4.67221	4.26288	1.21152	0.951035	2.29066	2.32787	0.0951645	-0.128106	-2.80735	-3.25389	-6.34247	-6.30526	7.15572	7.0977	2.31021	0	-0.745363	-0.370434	-3.02084
3240	1E	Estrada Esmeralda	2014-05-03	-19.0986	-40.0021	0.0243863	-5.57436	5.46317	-2.37508	2.06393	-6.33419	5.90307	-2.05515	1.70401	-3.69478	3.14369	-5.09447	3.82354	-2.01516	-0.0156047	-9.24313	9.07915	0.0084863	0	-3.67844	3.24108	-0.00786777	7.02326	2.46428	2.42429	3.98394	3.62402	1.74444	1.30454	2.46428	2.3843	0.0648207	-0.0551524	-2.17468	-2.33464	-4.45417	-4.49416	7.05684	6.99046	2.44406	0	0.0909703	-0.381703	-2.26592
3240	1F	Estrada Esmeralda	2014-05-03	-19.0986	-40.0021	0	-5.03988	5.80868	-1.53759	1.83657	-5.76597	6.6629	-0.98235	1.11048	-2.86163	3.03247	-4.01482	4.48464	-1.28133	0	-7.95061	9.16341	0	0	-3.01129	3.55598	0	7.16459	2.59453	2.63724	5.2426	4.98634	1.52676	1.61218	2.55182	2.55182	-0.352519	0.373565	-2.01824	-1.8474	-5.17885	-5.26427	7.13329	7.20067	2.61437	0	-0.568698	-0.427092	-1.93754
3240	1G	Estrada Esmeralda	2014-05-03	-19.0986	-40.0021	0.159437	-4.92918	6.45223	-1.16127	2.41241	-5.66722	7.34565	-2.09354	1.67437	-3.06465	3.96619	-4.0746	4.19925	-1.62741	-0.112474	-8.01804	10.6621	0.053196	0	-3.15242	4.02362	-0.0465438	7.24299	2.3486	2.50398	4.7958	4.7958	1.72709	1.22211	2.3486	2.42629	-0.253976	0.32869	-1.96313	-2.27389	-5.2649	-5.10953	7.13135	7.38637	2.41662	0	-0.402513	-0.312636	-2.11442
3240	1H	Estrada Esmeralda	2014-05-03	-19.0986	-40.0021	-0.0205236	-4.6243	4.12639	-2.05884	2.54494	-5.08117	5.18069	-1.4614	1.4555	-2.55085	3.14238	-3.71058	4.02096	-2.23456	0.0146198	-7.67747	6.83261	-0.00657438	0	-2.73183	3.14161	0.00615423	6.67017	2.13667	2.13667	4.13984	3.92898	0.836369	1.11752	2.17182	2.20696	-0.393649	0.484935	-2.18596	-1.79938	-4.646	-4.75143	6.67017	6.67017	2.13667	0	-0.673358	0.486944	-2.00012
3240	1I	Estrada Esmeralda	2014-05-03	-19.0986	-40.0021	0	-5.85471	5.81318	-2.11766	1.32873	-6.35298	6.26993	-1.4533	1.16264	-3.40486	3.15573	-4.73359	4.81664	-2.15918	0	-9.55596	9.48818	0	0	-3.65797	3.38718	0	7.02365	2.45615	2.45615	4.69838	4.32467	1.25199	1.4596	2.45615	2.41463	0.172398	-0.159784	-2.06983	-3.02485	-4.76881	-4.76881	7.02365	7.02365	2.45615	0	-0.254717	-0.559032	-2.54319
3240	1J	Estrada Esmeralda	2014-05-03	-19.0986	-40.0021	-0.0238278	-5.04886	5.20061	-1.37979	2.84762	-5.84648	6.23752	-0.78157	2.20952	-2.6161	4.1637	-3.77266	5.0012	-1.57919	0.0160533	-8.14041	8.36519	-0.00871164	0	-2.82207	3.99345	0.00737321	7.29132	2.70499	2.62522	4.61928	4.02106	1.74784	1.62819	2.74487	2.70499	-0.246222	0.391877	-2.47957	-1.96111	-4.79268	-4.91232	7.35448	7.22604	2.66576	0	-0.643955	0.870198	-2.2562
3240	1K	Estrada Esmeralda	2014-05-03	-19.0986	-40.0021	-0.0241318	-5.69997	4.54214	-1.60312	2.32302	-6.3401	5.77973	-1.8165	2.45105	-3.31014	2.66442	-3.95027	4.11539	-1.38975	0.0185437	-8.0993	6.44012	-0.0115185	0	-3.34677	2.75399	0.00981905	7.31192	3.51381	3.47113	5.22083	4.79407	2.70297	1.84946	3.55648	3.59916	-0.0709316	0.0570948	-3.10089	-2.84484	-5.57607	-5.61874	7.34557	7.28499	3.49011	0	-0.24429	-0.122042	-2.97517
3240	1L	Estrada Esmeralda	2014-05-03	-19.0986	-40.0021	0	-5.8061	5.11587	-2.19251	2.51733	-6.45574	6.65875	-1.9895	2.35492	-3.49178	3.36998	-4.70985	4.83165	-1.70529	0	-9.18051	8.08912	-1.77636e-15	0	-3.65469	3.49152	0	6.71785	2.37342	2.29222	3.8351	3.14486	1.19596	1.35837	2.29222	2.25162	-0.103307	0.0997035	-2.62064	-2.21462	-5.13797	-5.21918	6.78611	6.65771	2.33025	0	-0.439972	-0.0927387	-2.42022
2980	2A	Estrada da Formiga	2014-09-26	-19.0972	-39.9803	-0.0483111	-5.77252	5.23863	-2.07564	2.05852	-6.36879	7.1467	-1.59862	1.62125	-3.10917	2.53553	-4.02346	4.20509	-1.71787	0.0311918	-9.19619	8.31056	-0.0188128	0	-3.01454	3.18356	0.0122327	8.23704	3.22835	3.1886	5.29543	5.33518	1.83705	1.24078	3.14885	3.1886	-0.985301	0.803514	-2.45611	-1.70083	-5.23871	-5.31821	8.27006	8.20686	3.20758	0	-0.833061	-0.168532	-2.08568
2980	2B	Estrada da Formiga	2014-09-26	-19.0972	-39.9803	0	-6.23525	3.45095	-2.07842	1.25489	-6.98034	4.5882	-2.549	0.313723	-4.74506	1.99998	-5.52937	3.29409	-2.86272	0	-11.2558	6.22963	0	0	-4.19836	2.20613	0	8.21084	2.68147	2.60304	5.97556	5.54419	1.42657	1.93637	2.68147	2.7599	-0.965565	0.406974	-2.92633	-1.43615	-4.18123	-4.29887	8.30198	8.16039	2.63098	0	0.401182	0.113379	-1.99249
2980	2C	Estrada da Formiga	2014-09-26	-19.0972	-39.9803	0.0463598	-6.1833	4.8835	-2.4455	2.17177	-6.80626	5.87292	-2.1157	0.999131	-4.13117	2.86803	-4.68085	4.37047	-2.40886	-0.0269303	-10.7859	8.55464	0.0150068	0	-4.03345	3.05222	-0.013853	8.50702	2.75375	2.75375	5.94186	5.3189	1.87426	1.61775	2.64381	2.60717	-0.324438	0.225238	-2.52314	-2.55978	-4.97836	-4.94171	8.50702	8.50702	2.75375	0	0.0664426	-0.116185	-2.54203
2980	2D	Estrada da Formiga	2014-09-26	-19.0972	-39.9803	0	-4.9014	5.58532	-1.36783	1.6718	-5.58532	6.5352	-1.17786	1.21585	-3.41958	4.29348	-4.1035	5.6993	-1.6718	0	-7.31971	8.34107	0	0	-3.18338	4.04905	0	7.41415	3.15867	3.15867	4.75447	4.64049	2.24678	2.20878	3.12067	3.15867	-0.336905	0.423003	-1.70474	-1.66674	-5.50427	-5.46628	7.41415	7.41415	3.15867	0	0.135491	0.786337	-1.68883
2980	2E	Estrada da Formiga	2014-09-26	-19.0972	-39.9803	0	-4.73428	5.72059	-1.24932	1.61097	-5.19456	6.21374	-0.657539	1.61097	-3.09043	4.274	-4.20825	5.16168	-1.67672	0	-7.36212	8.8959	-3.55271e-15	0	-2.96754	4.26906	0	6.64085	2.49835	2.49835	4.60248	4.37234	1.54492	1.51205	2.49835	2.49835	-0.427694	0.591492	-1.7099	-1.77565	-4.96471	-4.96471	6.64085	6.64085	2.49835	0	-0.286723	0.604687	-1.73943
2980	2F	Estrada da Formiga	2014-09-26	-19.0972	-39.9803	-0.0395096	-4.90364	5.3949	-1.04588	1.8055	-5.27264	6.26709	-0.777515	1.67132	-2.99153	4.38852	-3.93081	5.3278	-1.07943	0.0275818	-7.72675	8.46767	-0.0150837	0	-3.04078	4.01768	0.0110055	6.45983	2.43434	2.50143	4.07808	4.14517	1.2267	1.52861	2.4008	2.46789	-0.0815873	0.119687	-2.12788	-1.35632	-4.50962	-4.50962	6.40975	6.51525	2.46619	0	-0.188871	0.702444	-1.79939
7097	1A	Estrada Principal RPPN	2014-12-13	-19.0618	-39.9918	0	-3.98934	3.15497	-2.19023	1.48623	-4.74549	3.44179	-2.08593	1.12119	-2.60741	0.912595	-3.38964	1.22548	-1.32978	0	-7.01912	5.55107	0	0	-2.71526	1.12805	0	4.85075	1.25252	1.22645	1.90438	1.93045	0.366004	0.626745	1.20038	1.1743	-0.0772567	0.0270398	-1.48526	-2.6586	-3.46689	-3.51904	4.87637	4.8305	1.23796	0	-0.271379	-1.8223	-2.34703
7097	1C	Estrada Principal RPPN	2014-12-13	-19.0618	-39.9918	-0.0183547	-3.28956	3.8662	-1.09902	1.47121	-3.66925	4.01224	-0.69012	1.0039	-1.12823	1.99694	-2.35493	2.2306	-0.748535	0.0108525	-5.56857	6.52841	-0.00642453	0	-1.59327	2.06874	0.0060792	4.41836	1.50603	1.59428	3.09458	3.09458	0.829425	0.917678	1.6237	1.6237	-0.0531006	0.0939871	-1.52398	-1.40631	-2.70068	-2.61243	4.34991	4.49911	1.54652	0	-0.610707	-0.366997	-1.46339
7097	1D	Estrada Principal RPPN	2014-12-13	-19.0618	-39.9918	-0.0177897	-3.76702	2.94923	-1.17762	0.953235	-3.87491	3.32685	-0.988814	0.224966	-2.41838	1.35783	-3.06573	2.19399	-0.530275	0.00918322	-7.26672	5.67399	-0.00481577	0	-2.30199	1.62366	0.00602322	4.25173	1.01498	1.25774	2.93006	2.66033	-0.0369584	0.529472	1.17682	1.25774	-0.414579	0.232771	-1.43955	-1.43955	-2.19479	-2.19479	3.98972	4.45746	1.15097	0	-0.230295	-0.298892	-1.43955
7097	1E	Estrada Principal RPPN	2014-12-13	-19.0618	-39.9918	-0.00566913	-3.25337	3.60288	-1.02809	1.50378	-3.61488	3.82777	-0.702538	1.26844	-2.02633	1.73912	-2.73235	2.18038	-0.467198	0.003483	-5.23454	5.79243	-0.00220753	0	-1.99993	1.87832	0.00156073	4.60091	1.83435	1.74413	3.33791	3.33791	1.05249	0.93221	1.80428	1.80428	0	0	-1.08257	-1.41335	-2.8267	-2.8267	4.66971	4.52461	1.79157	0	0.0404832	-0.445865	-1.26665
7097	1F	Estrada Principal RPPN	2014-12-13	-19.0618	-39.9918	0.0195353	-3.64327	2.9561	-1.46453	1.66148	-3.83273	3.65077	-1.43296	1.3773	-1.62241	1.31415	-2.60127	1.59833	-1.1172	-0.0120406	-5.30304	4.31277	0.00963011	0	-1.75712	1.4236	-0.00561767	5.09873	2.6358	2.41477	3.45678	3.39363	1.56222	1.05701	2.60423	2.60423	-0.174453	0.141306	-1.56379	-1.40591	-3.07944	-3.14259	5.27699	4.95493	2.51346	0	-0.365644	-0.454586	-1.46621
7097	1G	Estrada Principal RPPN	2014-12-13	-19.0618	-39.9918	0	-3.61068	3.54896	-1.23442	1.51217	-3.98101	3.85757	-1.11098	1.0184	-1.72819	1.85163	-2.59228	2.53056	-0.648071	0	-5.50713	5.41299	0	0	-1.95115	2.05793	8.88178e-16	4.26407	1.67179	1.73351	2.72105	2.65933	1.17802	1.17802	1.64093	1.61007	-0.148982	0.159623	-1.72287	-1.44512	-3.29676	-3.17331	4.2166	4.31074	1.70292	0	-0.555097	-0.327998	-1.58232
7097	1H	Estrada Principal RPPN	2014-12-13	-19.0618	-39.9918	-0.0410871	-3.63103	3.23937	-1.24805	1.16587	-3.78576	3.61075	-0.721937	0.763554	-1.867	2.03241	-2.6407	2.77516	-0.288669	0.0208083	-5.99497	5.32285	-0.0167648	0	-1.99914	1.86892	0.0144604	4.54013	1.75483	1.94052	3.39506	3.33317	1.29062	0.950191	1.78578	2.00241	0.207445	-0.225824	-1.33994	-1.86605	-2.23743	-2.29932	4.37921	4.6851	1.85251	0	-0.0568337	0.135214	-1.59787
7097	1I	Estrada Principal RPPN	2014-12-13	-19.0618	-39.9918	0.068209	-3.7375	3.47332	-1.1336	1.13648	-3.90442	3.77377	-1.10021	0.669111	-1.70111	1.20325	-2.83615	2.40505	-0.833144	-0.0319413	-6.25142	5.85135	0.0277282	0	-1.92722	1.56894	-0.0128109	4.75189	1.9143	1.94769	3.65024	3.51671	1.3134	1.28002	1.9143	1.88092	0.0782121	-0.0553217	-0.856524	-0.923291	-2.39216	-2.22525	4.72264	4.77867	1.93173	0	-0.107995	-0.319434	-0.89249
7097	1J	Estrada Principal RPPN	2014-12-13	-19.0618	-39.9918	0.0257582	-3.77118	3.45406	-1.44878	0.726165	-3.9555	3.85956	-1.30133	0.173212	-2.07546	2.2007	-2.40723	2.71679	-0.822102	-0.0111053	-7.00698	6.43608	0.00870771	0	-2.07854	2.13052	-0.00732592	4.40465	1.56616	1.4187	2.74579	2.67206	0.902616	0.755162	1.49243	1.45557	0.0178919	-0.0189716	-1.23547	-1.27233	-2.0096	-1.89901	4.54817	4.27382	1.48902	0	0.00627059	0.151481	-1.25273
7097	1K	Estrada Principal RPPN	2014-12-13	-19.0618	-39.9918	0	-3.50417	3.79351	-1.12519	1.22164	-3.72921	3.9221	-0.57867	0.610819	-2.05749	2.25039	-2.60402	2.63617	-0.57867	0	-6.37995	6.90673	0	0	-2.12996	2.32754	0	4.28005	1.16166	1.2581	2.86552	2.76908	0.743731	0.679434	1.19381	1.2581	-0.0921266	0.100764	-1.57095	-1.44236	-2.5354	-2.5354	4.19573	4.37133	1.20797	0	-0.2882	-0.207861	-1.50705
7097	1L	Estrada Principal RPPN	2014-12-13	-19.0618	-39.9918	0.0656929	-3.58895	3.65786	-1.55859	1.28391	-4.02626	3.90775	-1.33994	0.909072	-2.40197	1.78369	-3.18288	2.3147	-0.965104	-0.0280159	-5.93273	6.08388	0.0284967	0	-1.99257	1.82194	-0.0131717	4.99266	2.15016	2.18139	3.36837	3.21219	1.40049	1.65038	2.11892	2.15016	-0.161327	0.1198	-0.910997	-1.06718	-2.31663	-2.12921	4.9668	5.0186	2.16575	0	0.2317	0.0342958	-1.00105
7097	1M	Estrada Principal RPPN	2014-12-13	-19.0618	-39.9918	0.0309341	-3.9551	3.58054	-1.36563	1.77664	-4.76976	3.87149	-1.16197	1.22383	-1.91844	1.51478	-2.87858	2.6204	-1.36563	-0.0272561	-6.04192	5.49732	0.0107447	0	-2.27281	2.02507	-0.0136065	3.9441	1.35463	1.38373	2.40206	2.28568	0.423589	0.685445	1.23825	1.29644	0.0162579	-0.0128372	-1.96221	-1.52578	-3.53334	-3.47515	3.92065	3.9652	1.36994	0	-0.713958	-0.711129	-1.73483
7132	2A	Estrada Principal RPPN	2014-12-13	-19.0618	-39.9918	-0.0968118	-5.25489	5.73579	-2.12037	2.83933	-5.7707	6.33095	-1.92198	2.44255	-2.75521	3.07739	-4.42166	3.71223	-1.04907	0.0618984	-8.3282	9.01551	-0.038676	0	-3.0233	3.24049	0.022061	7.79335	3.15108	3.07172	4.65882	4.53979	2.23849	2.07978	3.1114	2.99237	0.0562287	-0.0628039	-1.92765	-1.64991	-5.14153	-4.98282	7.85278	7.72756	3.11341	0	-0.262928	-0.470552	-1.77591
7132	2B	Estrada Principal RPPN	2014-12-13	-19.0618	-39.9918	-0.0248475	-4.84976	6.30348	-1.91286	2.87709	-5.26931	7.07266	-1.4933	2.28272	-2.99671	5.14969	-3.59108	5.60421	-0.898925	0.0101156	-8.43588	10.9474	-0.0100023	0	-2.84171	4.40586	0.00352423	7.10638	2.87584	2.84088	4.27437	4.16948	1.9668	1.93184	2.87584	2.80591	0.218644	-0.375729	-0.830249	-1.28477	-3.27767	-2.89307	7.13274	7.07198	2.86067	0	0.492184	1.11194	-1.00793
7132	2D	Estrada Principal RPPN	2014-12-13	-19.0618	-39.9918	0.0597551	-6.0019	6.25512	-3.28307	4.02657	-6.89332	6.47797	-2.6145	3.62543	-3.41678	2.55573	-6.35846	3.35801	-1.41109	-0.0293868	-10.515	11.0039	0.0213878	0	-3.68322	2.80374	-0.0149892	9.02302	3.27337	3.18422	5.32363	5.10078	2.73852	2.24823	3.27337	3.09508	0.509967	-0.381452	-2.03058	-2.38715	-4.74941	-4.43741	9.09993	8.94343	3.22956	0	0.279857	-1.00149	-2.26337
7132	2E	Estrada Principal RPPN	2014-12-13	-19.0618	-39.9918	0	-5.16589	6.02068	-2.00689	1.78391	-6.02068	6.61532	-1.8954	1.41226	-3.34482	4.19961	-4.08812	4.75708	-1.00345	0	-8.66446	10.0981	0	0	-3.35343	4.19318	0	6.62795	2.20535	2.13102	3.87776	3.87776	1.49922	1.01608	2.09386	2.05669	-0.0988618	0.124126	-1.54829	-1.73411	-4.59579	-4.40997	6.68552	6.56085	2.17103	0	-0.115646	0.145581	-1.63417
7132	2F	Estrada Principal RPPN	2014-12-13	-19.0618	-39.9918	0	-6.585	5.38773	-1.87573	2.39455	-6.86437	6.54509	-1.43673	1.91564	-2.67391	4.31018	-4.19046	5.06846	-1.23718	0	-10.4834	8.57733	0	0	-3.1945	3.98833	0	6.7378	3.14598	2.14825	4.46298	4.46298	1.98861	1.0707	3.10607	3.10607	0.152795	-0.246296	-2.4413	-1.88257	-4.75603	-4.39684	7.61141	6.02302	2.59723	0	-0.737688	0.448236	-2.18842
7132	2G	Estrada Principal RPPN	2014-12-13	-19.0618	-39.9918	0.0294614	-5.56634	5.70192	-2.04022	2.32911	-7.17609	6.27683	-1.92524	1.94583	-3.95659	3.17231	3.93886	-5.02976	-1.27367	-0.00886596	-9.88912	10.144	0.0126925	0	-1.92643	2.40103	-0.003833	8.2492	3.53493	3.57326	5.79625	5.71959	1.92518	2.30846	3.4966	3.45828	-0.297808	0.238776	-0.719409	-1.52428	-2.82742	-2.48247	8.21547	8.28361	3.55391	0	-0.406214	0.0729862	-1.07324
7132	2H	Estrada Principal RPPN	2014-12-13	-19.0618	-39.9918	0	-5.03658	6.30505	-1.75348	2.38771	-6.30505	6.75274	-1.08193	1.3804	-2.31309	4.17849	-4.29042	4.6635	-1.30578	0	-7.83753	9.81143	0	0	-2.47405	3.91438	0	7.69059	3.62402	3.62402	5.48942	5.37749	2.39286	2.39286	3.66133	3.62402	0.0797619	-0.144086	-2.0841	-1.97218	-4.06142	-3.68834	7.69059	7.69059	3.62402	0	-0.0963831	0.851412	-2.03047
7132	2I	Estrada Principal RPPN	2014-12-13	-19.0618	-39.9918	0.728967	-3.26424	6.80198	-1.26764	3.05834	-4.84489	7.46751	-0.269336	2.64238	-1.30924	4.59739	-2.64031	4.5142	1.10333	-0.352528	-5.32783	11.8725	0.280399	0	-1.68057	4.61264	-0.181994	7.78728	2.92271	3.12915	5.81285	5.81285	2.01437	1.43634	2.96399	3.12915	-0.173882	0.610587	-2.11441	-1.61896	-3.47691	-3.76592	7.66306	8.01581	2.9954	0	-0.715233	1.0192	-1.94417
7291	1A	Estrada Principal Xerxes	2015-01-13	-19.0627	-39.9961	0	-5.45006	5.06625	-2.26446	2.07256	-6.40958	5.60358	-1.72713	1.42009	-4.1835	3.79969	-5.33492	4.79759	-1.03628	0	-9.87419	9.17882	0	0	-3.0141	3.08671	0	7.28496	3.10146	2.67927	5.17402	4.94373	1.79651	1.52785	2.83279	2.71765	-0.160904	0.146142	-0.890137	-0.544711	-2.69403	-2.54051	7.68136	6.91646	2.88266	0	0.579718	0.639742	-0.708265
7291	1B	Estrada Principal Xerxes	2015-01-13	-19.0627	-39.9961	0.769632	-4.47099	6.01026	-1.08206	2.72613	-5.27455	6.81382	-0.31343	1.53826	-2.72412	3.98388	-3.70237	4.50794	0.734695	-0.348368	-7.24386	10.287	0.320054	0	-2.71265	3.60434	-0.136575	7.43176	2.9947	3.20432	5.89451	5.61501	1.91164	1.94657	2.9947	3.02964	0.269574	-0.394238	-0.848426	-1.93149	-3.11936	-3.36393	7.27149	7.62211	3.09052	0	0.28268	0.719089	-1.31881
7291	1C	Estrada Principal Xerxes	2015-01-13	-19.0627	-39.9961	0.0280259	-5.1527	5.24629	-1.58626	1.75493	-5.64074	5.95958	-1.47363	1.19181	-3.31317	3.85726	-4.62712	4.7958	-1.13576	-0.00951555	-9.17886	9.36062	0.0115419	0	-2.72645	3.13951	-0.00374715	7.59503	3.16513	3.09005	5.79304	5.64287	2.15151	1.92627	3.05251	3.05251	0.0867321	-0.100975	-0.739181	-1.3023	-2.72888	-2.57871	7.66151	7.52765	3.12785	0	0.455526	0.817738	-1.01548
7291	1D	Estrada Principal Xerxes	2015-01-13	-19.0627	-39.9961	-0.0296087	-5.2914	5.19107	-1.87946	2.1491	-5.86691	5.60215	-1.34506	2.10799	-3.85263	3.46455	-4.83921	4.78	-1.30395	0.011499	-9.85389	9.64746	-0.0105974	0	-3.33819	2.88354	0.00321461	7.3616	2.55199	2.71642	5.34732	5.30621	1.60652	1.48319	2.53608	2.61845	0.0650522	-0.0584994	-0.882177	-0.717441	-3.06492	-2.859	7.20749	7.5134	2.63483	0	0.558969	0.232541	-0.799247
7291	1E	Estrada Principal Xerxes	2015-01-13	-19.0627	-39.9961	-0.0253809	-5.42222	5.52137	-2.04919	1.62365	-5.87195	6.38336	-1.37459	1.51122	-3.54831	3.38512	-4.5977	5.03415	-1.1872	0.0120971	-9.20692	9.35828	-0.00999495	0	-3.20871	3.2134	0.0045283	7.30594	2.69309	3.06509	5.29712	5.22272	1.98628	1.91188	2.69309	2.69309	-0.171342	0.163462	-1.25015	-1.36175	-3.74258	-3.48218	6.99383	7.62492	2.87707	0	0.177782	0.322285	-1.30348
7291	1F	Estrada Principal Xerxes	2015-01-13	-19.0627	-39.9961	0	-5.06123	5.68472	-1.72375	2.31056	-5.31796	6.56493	-0.91689	1.02692	-3.66756	3.88761	-4.58445	5.31796	-1.54037	0	-9.04679	10.1612	0	0	-3.2934	3.63492	0	6.89715	2.23935	2.38605	4.84331	4.62326	1.54251	1.28578	2.34937	2.34937	-0.0712147	0.0754876	-0.804726	-0.951429	-3.73877	-3.51872	6.77364	7.03587	2.30844	0	0.228115	0.256907	-0.872644
7291	1G	Estrada Principal Xerxes	2015-01-13	-19.0627	-39.9961	0.0273246	-5.3331	5.79078	-1.98787	1.8007	-5.57492	6.91929	-1.18179	1.51857	-3.88215	2.8889	-4.56732	4.05772	-1.3027	-0.0129793	-9.18221	9.98981	0.0104056	0	-3.52201	2.97611	-0.00663031	7.51426	2.91962	2.79871	5.09603	4.93481	2.03293	0.98503	2.95992	2.95992	0.138648	-0.103175	-0.949557	-2.60202	-3.77083	-3.56931	7.61437	7.40598	2.86154	0	0.710643	-0.289617	-1.82333
7291	1H	Estrada Principal Xerxes	2015-01-13	-19.0627	-39.9961	0.0255465	-5.50704	5.48854	-1.81865	1.93933	-5.95939	6.56722	-1.81865	0.965042	-3.59325	3.22679	-4.77632	4.79262	-1.3663	-0.00924961	-9.79637	9.77787	0.0102967	0	-3.00653	2.90337	-0.00428988	8.0727	3.16645	3.34043	6.01973	5.88055	2.47053	1.42664	3.41002	3.37523	0	0	-0.800311	-1.91379	-3.02726	-2.92288	7.91729	8.22701	3.25375	0	0.396899	0.395296	-1.3556
7291	1I	Estrada Principal Xerxes	2015-01-13	-19.0627	-39.9961	0	-5.69221	5.3033	-2.12132	1.9799	-5.86899	6.92965	-0.919239	1.55563	-3.78302	3.71231	-4.73762	5.23259	-1.44957	0	-9.41932	8.77577	0	0	-3.39009	2.93148	0	7.92093	3.32474	3.50151	5.97639	5.87032	2.58227	0.991284	3.39545	3.32474	0.142756	-0.140087	-0.917905	-1.16539	-3.39278	-3.46349	7.76949	8.06202	3.41625	0	0.579348	0.38652	-1.03551
7291	1J	Estrada Principal Xerxes	2015-01-13	-19.0627	-39.9961	-0.0243968	-5.50023	5.89914	-1.64304	2.00751	-5.81018	6.829	-1.29865	1.76644	-3.53719	3.97055	-4.39817	5.55475	-1.64304	0.0100424	-9.57718	10.2564	-0.00975154	0	-3.27092	3.45918	0.00519852	8.00214	3.21509	3.18065	5.79803	5.69471	2.28524	1.73421	3.28397	3.31841	0.0811283	-0.0910676	-1.53751	-1.91634	-3.25947	-3.29391	8.031	7.97108	3.19851	0	0.581724	0.49812	-1.70512
7291	1K	Estrada Principal Xerxes	2015-01-13	-19.0627	-39.9961	0	-5.51463	5.82975	-1.77256	2.16646	-5.75097	6.97207	-1.49683	2.52097	-3.97841	3.66329	-4.88439	5.47524	-1.69378	0	-9.3926	9.92932	0	0	-3.48408	3.04248	0	8.46788	3.50472	3.54411	6.34081	6.30142	2.55935	1.61398	3.54411	3.5835	0.471668	-0.434308	-0.355527	-2.20687	-3.46736	-3.50675	8.43527	8.50236	3.52386	0	0.923014	0.173009	-1.2284
7291	1L	Estrada Principal Xerxes	2015-01-13	-19.0627	-39.9961	0.0283674	-5.33175	5.9124	-1.624	1.80164	-5.53326	6.75874	-1.22098	1.19711	-3.59878	3.4137	-4.76753	4.78396	-1.78521	-0.0119343	-9.46548	10.5159	0.0107448	0	-3.20572	3.20325	-0.00503862	7.80102	2.76332	3.16634	5.62473	5.58443	1.71548	0.788541	3.08573	3.12603	0.103413	-0.0980949	-0.622016	-2.15348	-3.36253	-3.28192	7.46074	8.17692	2.95481	0	0.34738	0.217592	-1.38562
7610	5A	Estrada Principal Xerxes	2015-01-18	-19.0617	-39.9916	-0.0334518	-5.1651	3.84147	-1.744	1.2931	-6.21238	4.46983	-1.49964	0.909096	-4.81601	1.71201	-6.07274	3.87638	-1.32509	0.0363665	-6.63154	4.91423	-0.018097	0	-3.47954	2.4929	0.00829582	5.08468	2.71085	2.78067	3.61849	3.61849	0.371937	1.7683	2.64103	2.81558	-0.849884	0.302119	-1.6877	-0.98952	-5.4928	-5.52771	5.03353	5.12303	2.75075	0	0.0410982	-0.1639	-1.26096
7610	5B	Estrada Principal Xerxes	2015-01-18	-19.0617	-39.9916	-0.0258123	-4.45786	4.13138	-1.77802	1.76075	-5.07629	5.84923	-1.09088	1.17668	-3.04922	1.89818	-4.04558	3.89088	-1.43445	0.00854471	-7.72118	7.14367	-0.0113075	0	-2.32786	1.81524	0.00321723	7.64043	3.31145	3.38016	5.88822	5.88822	2.48688	1.52489	3.31145	3.44888	-0.0211752	0.0131818	-0.777028	-1.1206	-2.52923	-2.52923	7.57886	7.69778	3.34702	0	0.526066	0.0603684	-0.952301
7610	5C	Estrada Principal Xerxes	2015-01-18	-19.062	-39.9916	-0.0183095	-4.52935	5.91229	-1.81642	2.31608	-5.12872	6.63784	-1.05932	1.33816	-2.41579	2.91544	-3.3937	3.67254	-1.31168	0.0132362	-7.29199	9.49988	-0.00637979	0	-2.59958	3.28774	0.00654914	6.62805	2.43247	2.14856	4.07285	4.07285	1.076	0.350448	2.46401	2.46401	-0.18583	0.224265	-2.58331	-2.14167	-4.75996	-4.79151	6.82582	6.36925	2.30949	0	-0.636411	-0.939153	-2.37079
7610	5D	Estrada Principal Xerxes	2015-01-18	-19.062	-39.9916	0	-4.70885	4.77206	-1.86458	1.92778	-5.15129	5.46732	-1.29572	1.61175	-2.52824	2.52824	-3.00229	2.90748	-1.54855	0	-6.64679	6.73601	0	0	-2.84532	2.7901	0	4.78786	1.65916	2.1332	3.1129	3.1129	0.869083	1.24832	1.56435	1.75397	-0.20542	0.20542	-1.43794	-1.37473	-5.13549	-5.13549	4.45552	5.12466	1.8946	0	-1.02983	-0.885667	-1.40583
7610	5E	Estrada Principal Xerxes	2015-01-18	-19.062	-39.9916	-1.77636e-15	-4.97211	4.67077	-1.69504	1.80804	-5.61246	5.53713	-1.69504	1.01702	-3.16407	1.73271	-4.21876	2.7874	-1.2807	-1.77636e-15	-8.00385	7.51877	-1.77636e-15	0	-2.81407	2.14058	-1.77636e-15	7.99247	3.35936	3.4347	5.50641	5.43108	2.30467	2.154	3.3217	3.28403	-0.219051	0.119957	-1.19841	-1.91409	-4.17414	-4.13647	7.92994	8.05121	3.39821	0	0.10595	-0.66666	-1.62936
7610	5F	Estrada Principal Xerxes	2015-01-18	-19.062	-39.9916	-0.0229636	-5.55958	5.58602	-2.04944	1.2074	-6.21094	6.16502	-2.158	1.31596	-3.67785	1.60545	-4.76346	2.65488	-1.50663	0.0132235	-8.25408	8.28053	-0.0111694	0	-3.21345	2.25551	0.00586619	7.32537	3.81523	3.30861	5.22653	5.15415	3.01912	1.82495	3.67048	3.59811	-0.201526	0.08797	-1.68519	-1.97469	-4.25447	-4.21829	7.69952	6.94794	3.56303	0	0.433155	-1.18974	-1.87131
7610	5G	Estrada Principal Xerxes	2015-01-18	-19.0617	-39.9916	-0.0248219	-5.07387	6.6681	-1.43386	1.81475	-5.58269	7.09864	-2.13838	2.12787	-3.54741	2.63669	-4.48677	3.49777	-1.23816	0.014318	-8.03886	10.5454	-0.0104116	0	-3.18799	3.18456	0.00401164	7.57069	3.22616	3.10874	5.37886	5.26144	2.0911	2.20852	3.22616	3.22616	-0.022452	0.0166879	-1.15751	-1.27493	-4.36698	-4.36698	7.65083	7.46499	3.17553	0	0.41185	-0.805119	-1.22355
7610	5H	Estrada Principal Xerxes	2015-01-18	-19.0617	-39.9916	1.16281	-4.19962	6.7806	-0.582107	3.20564	-4.62521	7.24874	-0.794902	3.20564	-1.68864	3.29076	-2.41214	3.37588	1.12025	-0.496989	-7.33173	12.9368	0.402186	0	-1.97804	3.33356	-0.21982	8.3782	3.05833	2.6753	6.33537	6.25025	1.86668	1.0155	3.82439	3.78183	-0.346388	0.675028	-1.79339	-1.24013	-3.53831	-3.58087	8.67452	7.96748	2.8978	0	-0.92519	-0.287943	-1.58383
7610	5I	Estrada Principal Xerxes	2015-01-18	-19.0617	-39.9916	0.0813719	-5.26516	5.18114	-1.39921	1.97322	-5.84094	5.79805	-1.60484	2.13773	-2.7564	1.89097	-3.86684	2.50788	-1.07019	-0.0420097	-8.46179	8.37777	0.0345293	0	-2.73398	2.22202	-0.0173422	7.32347	3.1285	3.08737	5.3905	5.3905	1.93581	1.73018	3.21075	3.00512	-0.24393	0.167342	-1.43662	-1.64225	-3.90425	-3.78087	7.35711	7.29081	3.10764	0	-0.219841	-0.803753	-1.5608
7610	5J	Estrada Principal Xerxes	2015-01-18	-19.0617	-39.9916	-0.022432	-4.55523	5.78979	-1.55773	2.02464	-4.99389	6.88643	-1.81362	2.17086	-2.58127	2.79229	-3.71447	3.55994	-1.33841	0.0141228	-6.73882	8.54984	-0.0106119	0	-2.60093	2.98452	0.0046693	7.4923	3.54438	3.54438	5.51834	5.44523	2.44774	2.33807	3.54438	3.50783	0.0351193	-0.0379903	-1.35396	-1.75607	-4.71701	-4.71701	7.4923	7.4923	3.54438	0	0.0110148	-0.468215	-1.55954
7610	5K	Estrada Principal Xerxes	2015-01-18	-19.0617	-39.9916	0.269488	-4.83339	6.0501	-1.80356	2.06347	-5.35166	6.2893	-1.56436	1.62494	-2.08262	2.58173	-3.43808	3.49866	-1.44476	-0.129174	-7.84073	10.0004	0.114019	0	-2.27864	2.86672	-0.0643357	7.62652	3.2811	3.1615	5.59334	5.43387	2.28444	2.16484	3.36083	3.24123	-0.267003	0.330991	-1.78192	-1.86165	-3.85497	-3.65564	7.71564	7.51959	3.22673	0	-0.486083	-0.350492	-1.8207
7610	5L	Estrada Principal Xerxes	2015-01-18	-19.0617	-39.0016	0.0475389	-5.41692	3.79688	-1.70747	1.72277	-6.41408	4.11597	-1.42826	1.56323	-3.62203	1.20425	-4.61919	2.75983	-1.46815	-0.0322343	-7.71028	5.42771	0.0237114	0	-3.42063	1.92971	-0.00732023	7.86768	3.75937	4.03857	6.11267	6.07279	2.68243	2.56277	3.99869	3.99869	0.0898023	-0.0298574	-1.386	-1.10679	-5.65386	-5.33477	7.6326	8.03072	3.92423	0	0.387861	-0.532098	-1.2115
8314	2A	Estrada Principal Xerxes	2015-02-28	-19.0611	-39.989	0.0608548	-6.21277	6.10772	-1.33748	2.17726	-6.55291	6.48565	-0.695004	1.72374	-4.36092	4.02911	-5.30574	4.89835	-1.90438	-0.052524	-9.65876	9.55371	0.0201832	0	-4.25445	4.28357	-0.0131296	7.18087	2.34338	2.41896	4.8755	4.83771	1.47414	1.51193	2.45675	2.49455	-0.491094	0.453729	-1.5493	-1.5493	-6.31121	-6.19783	7.12124	7.23911	2.38161	0	-0.371847	-0.132621	-1.5493
8314	2B	Estrada Principal Xerxes	2015-02-28	-19.0611	-39.989	0.0210746	-5.32409	6.59678	-2.28619	2.98207	-5.93936	6.94287	-1.40174	2.48216	-3.47828	4.25106	-4.82418	5.17397	-1.74783	-0.0173799	-8.3593	10.3798	0.00708291	0	-3.76647	4.32622	-0.00440766	7.52362	2.56299	2.48609	4.21653	4.13963	1.94772	1.25554	2.56299	2.6399	0.294183	-0.359543	-1.12863	-2.05154	-6.39689	-6.20462	7.57768	7.45678	2.5286	0	-0.0104729	-0.49733	-1.57353
8314	2C	Estrada Principal Xerxes	2015-02-28	-19.0611	-39.989	0	-6.04135	5.79404	-1.30719	2.40241	-6.35931	6.53596	-0.600602	2.08444	-4.20421	4.45152	-5.33476	5.29943	-1.48384	0	-9.94869	9.54143	1.77636e-15	0	-3.80829	4.0886	0	7.36974	2.7769	2.7769	5.32062	5.17931	2.28229	1.85833	2.81223	2.81223	-0.12012	0.127186	-0.89737	-1.18001	-4.53631	-4.32433	7.36974	7.36974	2.7769	0	0.152077	0.686691	-1.03916
8314	2D	Estrada Principal Xerxes	2015-02-28	-19.0611	-39.989	0	-6.48499	5.42818	-1.68129	2.25774	-6.77321	5.95658	-1.15289	1.39307	-4.4194	3.36259	-5.57229	4.65959	-1.48915	0	-11.452	9.58577	0	0	-4.20115	3.25242	-1.77636e-15	7.23935	2.48369	2.53173	4.54928	4.74143	1.76313	1.61902	2.57976	2.53173	0.0818408	-0.0622701	-1.16712	-1.35927	-3.90523	-3.66504	7.19317	7.278	2.50984	0	0.318274	0.0478973	-1.27176
8314	2E	Estrada Principal Xerxes	2015-02-28	-19.0611	-39.989	0	-6.43414	5.77689	-1.41828	1.66042	-6.88384	6.05362	-1.00317	1.14154	-4.60075	3.66677	-5.77689	4.66994	-1.24532	0	-11.2364	10.0886	0	0	-3.78074	3.70546	0	7.25205	2.6167	2.54752	5.17652	5.17652	1.99404	1.89026	2.65129	2.65129	-0.462	0.368211	-1.15384	-1.01547	-3.81744	-3.67907	7.31571	7.19489	2.58025	0	0.0203623	0.31484	-1.07733
8314	2F	Estrada Principal Xerxes	2015-02-28	-19.0611	-39.989	0.112079	-6.60302	6.25871	-1.62887	1.74644	-6.85173	6.50741	-1.20252	1.56879	-3.76065	2.67021	-5.5016	4.02034	-1.6644	-0.0655697	-10.7797	10.2992	0.0428258	0	-3.99088	3.15464	-0.0206155	7.93516	3.03207	3.03207	6.51397	6.44291	2.35701	2.21489	3.13866	3.17419	0.0831083	-0.0590102	-0.805133	-1.94208	-4.64233	-4.64233	7.93516	7.93516	3.03207	0	-0.0343566	-0.734661	-1.45958
8314	2G	Estrada Principal Xerxes	2015-02-28	-19.0611	-39.989	0.0227014	-5.84892	7.08351	-1.79824	2.58689	-6.10905	7.23216	-1.12932	2.14094	-2.98743	3.92473	-3.805	5.29973	-1.42662	-0.0144608	-10.126	12.2868	0.0069822	0	-3.29129	4.25464	-0.00641958	7.65036	2.33618	2.37334	4.64023	4.64023	1.51861	1.25847	2.4105	2.37334	0.0321229	-0.0422014	-2.27193	-2.01179	-4.83612	-4.87328	7.6212	7.6856	2.353	0	-0.824204	-0.514777	-2.1634
8314	2H	Estrada Principal Xerxes	2015-02-28	-19.0611	-39.989	0	-6.15063	6.47246	-1.64494	2.10981	-6.47246	6.93734	-0.929746	2.50316	-2.93228	3.54019	-4.64873	5.50696	-1.35886	0	-11.216	11.8029	0	0	-3.38824	4.01188	1.77636e-15	8.50522	2.67643	2.64067	6.18086	6.1451	2.10428	1.56788	2.67643	2.74795	-0.291608	0.352063	-1.14983	-1.32863	-4.54698	-4.43971	8.537	8.47179	2.659	0	-0.51959	-0.0510198	-1.23168
8314	2I	Estrada Principal Xerxes	2015-02-28	-19.0611	-39.989	0.569585	-5.47347	6.50845	-1.3753	2.75759	-5.99442	7.09886	-0.958543	2.72286	-2.72978	3.6953	-4.39683	5.67492	0.604315	-0.40286	-8.78478	11.0218	0.185416	0	-3.49584	4.15234	-0.0913981	8.15727	2.70464	2.60045	5.89981	5.89981	2.14895	1.10705	2.66991	2.63518	-0.0737779	0.099873	-1.21987	-1.42825	-5.45696	-5.76953	8.23862	8.06639	2.65543	0	-0.600441	-0.252929	-1.30895
8314	2J	Estrada Principal Xerxes	2015-02-28	-19.0611	-39.989	0.0211416	-6.17371	6.039	-1.53642	2.07429	-6.5985	6.53459	-0.934636	2.03889	-4.04976	3.27787	-5.32413	5.26022	-1.57182	-0.0142575	-9.68338	9.48816	0.00829256	0	-4.04278	3.59674	-0.00270918	7.48414	2.91765	2.95305	5.89118	5.82038	2.45746	2.28046	2.98845	3.05924	0.156513	-0.126681	-0.870063	-1.04706	-5.18876	-5.04717	7.45601	7.51158	2.93557	0	0.162135	-0.274731	-0.95905
8314	2K	Estrada Principal Xerxes	2015-02-28	-19.0611	-39.989	0	-5.70391	6.45726	-1.29145	2.54703	-6.24201	6.92361	-0.609852	2.36766	-3.12101	3.58736	-5.02231	5.3093	-0.968588	0	-9.09248	10.2934	0	0	-3.73065	3.95384	0	7.41836	2.4678	2.64717	5.0507	5.01483	1.85795	1.57096	2.68304	2.61129	0.100139	-0.115103	-1.26306	-2.23165	-5.78314	-5.63964	7.28426	7.57018	2.55193	0	-0.336962	-0.565556	-1.7339
8314	2L	Estrada Principal Xerxes	2015-02-28	-19.0611	-39.989	0.0214496	-5.70024	6.57538	-1.36563	2.65689	-6.32442	7.06086	-0.42935	2.51819	-3.23818	3.83591	-5.14541	5.5004	-1.33095	-0.0132273	-9.08481	10.4965	0.00851179	0	-3.40115	4.00159	-0.00150683	8.45115	3.35365	3.35365	5.2262	5.15684	2.31334	2.24398	3.35365	3.21494	-0.0793671	0.0940173	-0.426136	-0.772905	-5.38493	-5.21155	8.45115	8.45115	3.35365	0	-0.108999	0.00772188	-0.59369
8314	2M	Estrada Principal Xerxes	2015-02-28	-19.0611	-39.989	0.121742	-5.67596	6.71793	-1.85711	2.5172	-6.02313	6.99566	-1.12806	2.27418	-2.82918	3.90587	-4.39144	5.12096	-1.16278	-0.0865591	-8.65186	10.3408	0.0493703	0	-3.2972	4.04353	-0.0285787	7.93349	3.28144	3.14258	5.98935	5.91992	2.34409	2.37881	3.42031	3.38559	0.0875006	-0.1208	-1.92607	-1.78721	-5.81435	-5.64077	8.0318	7.81899	3.2173	0	-0.515714	-0.309586	-1.86238
8823	1A	T. Botanicos	2015-04-05	-19.0802	-40.0003	0.0696162	-5.24889	6.02484	-1.72819	2.31687	-5.92306	6.84883	-1.61582	2.31687	-3.15145	3.55286	-4.72453	5.27575	-1.27874	-0.0427465	-8.54523	9.86663	0.0260541	0	-3.13777	3.7558	-0.0138879	7.54176	2.82252	2.82252	5.18214	5.06978	1.96108	1.13708	2.74761	2.82252	-0.21127	0.238181	-1.52217	-1.48471	-4.70578	-4.63087	7.54176	7.54176	2.82252	0	-0.199869	0.0352429	-1.50453
8823	1B	T. Botanicos	2015-04-05	-19.0802	-40.0003	0	-5.10586	6.23215	-1.61435	2.10241	-5.55638	6.83284	-1.50172	1.98978	-3.07853	3.41642	-4.46763	4.8806	-1.35155	0	-8.92951	10.8993	0	0	-3.0645	3.46837	0	7.41183	2.56877	2.75649	5.04661	4.97153	1.78037	0.804247	2.56877	2.49369	0.053385	-0.0592443	-0.810106	-1.4108	-3.77601	-3.70092	7.26399	7.59228	2.65331	0	0.0621062	-0.107194	-1.09718
8823	1C	T. Botanicos	2015-04-05	-19.0802	-40.0003	0.0233926	-5.46541	5.13625	-2.0819	2.12869	-6.02932	6.1137	-1.70596	1.86552	-3.69846	2.88058	-4.93908	4.42195	-1.25482	-0.0142019	-9.06304	8.53539	0.00844584	0	-3.57285	3.06469	-0.00414711	7.41547	2.71615	2.64096	5.08461	4.52069	1.88907	0.61086	2.67856	2.56577	0.0845363	-0.0658417	-1.15608	-1.45684	-4.53959	-4.50199	7.47991	7.3551	2.67733	0	0.210149	-0.231996	-1.31463
8823	1D	T. Botanicos	2015-04-05	-19.0802	-40.0003	0.89077	-4.63217	6.65737	-1.0585	3.00248	-5.03826	7.38834	-1.01789	2.75882	-2.35802	3.97712	-3.29204	5.52029	-0.571184	-0.571184	-7.03101	10.9273	0.347877	0	-2.75934	3.97146	-0.188329	7.67052	2.95978	3.041	5.15271	4.94966	2.02575	2.06636	3.08161	3.00039	-0.0453465	0.076483	-1.5073	-1.83218	-4.91853	-4.91853	7.61353	7.74273	2.99561	0	-0.673504	0.0834833	-1.62172
8823	1E	T. Botanicos	2015-04-05	-19.0802	-40.0003	0	-5.1237	6.03865	-1.39072	2.30567	-5.45309	6.9902	-1.6835	2.19587	-2.52525	3.4768	-3.25721	4.46494	-1.53711	0	-7.84634	9.24747	0	0	-2.78229	3.53126	0	8.35012	3.59239	3.66559	6.73981	6.44703	2.97023	2.49446	3.70219	3.73879	-0.0307958	0.0424	-1.23853	-1.49471	-5.59367	-5.26429	8.29867	8.41076	3.62599	0	-0.454906	-0.0423128	-1.34659
8823	1F	T. Botanicos	2015-04-05	-19.0802	-40.0003	0.0242603	-5.16909	6.42452	-1.58495	2.18206	-5.53482	6.93654	-1.65809	1.88948	-2.90157	2.8038	-4.2182	3.53526	-1.54837	-0.0123127	-8.14549	10.1397	0.0108761	0	-2.61651	3.18339	-0.00418306	7.76328	3.44768	3.52083	5.45919	5.38604	2.67965	1.8019	3.37453	3.30139	-0.502195	0.485273	-1.85539	-0.904497	-4.12291	-3.94005	7.71174	7.8271	3.48036	0	-0.209214	-0.235941	-1.33858
8823	1G	T. Botanicos	2015-04-05	-19.0802	-40.0003	0.0257109	-5.03464	5.89867	-1.19321	2.0203	-5.58869	6.9329	-1.45176	2.38967	-2.26437	3.12841	-3.8896	4.64282	-1.19321	-0.0112259	-8.81405	10.345	0.0098524	0	-2.6403	3.03758	-0.0037537	7.73898	2.86332	3.08494	6.48313	6.33538	1.97684	1.27504	2.97413	3.01107	0.0930565	-0.128565	-0.793428	-1.53216	-3.52675	-3.37901	7.5598	7.94816	2.96557	0	-0.111995	-0.0443804	-1.12986
8823	1H	T. Botanicos	2015-04-05	-19.0802	-40.0003	0	-5.34216	5.8114	-1.84088	1.87698	-5.8475	6.46113	-1.84088	1.6965	-3.10423	2.38231	-4.36758	3.79005	-1.29944	0	-8.97164	9.75969	0	0	-2.83628	2.67202	0	8.22506	3.49653	3.46044	5.59008	5.55398	2.81071	2.37757	3.46044	3.46044	-0.0408451	0.0313462	-1.232	-1.59296	-3.61432	-3.50603	8.2541	8.19348	3.47924	0	0.211794	-0.302927	-1.42526
8823	1K	T. Botanicos	2015-04-05	-19.0802	-40.0003	0.0227255	-5.57174	5.47819	-1.67994	1.76014	-6.09296	6.38165	-1.88843	1.72539	-3.55634	2.07287	-5.259	3.94927	-1.71468	-0.0120227	-9.26862	9.12887	0.00884786	0	-3.47671	2.63144	-0.0067232	7.68123	2.95548	3.02497	6.11756	5.87433	2.19102	1.77404	2.92073	2.88598	0.175622	-0.102364	-2.70848	-1.94402	-4.20265	-4.06366	7.6228	7.73851	2.99058	0	0.310507	-0.650586	-2.27244
8857	2A	T. Botanicos	2015-04-05	-19.081	-40.0007	0.0255763	-5.02472	5.85001	-1.96505	2.01621	-5.98317	6.47669	-2.77605	1.83189	-2.88664	2.20052	-4.28745	4.63351	-1.59642	-0.0112872	-8.54409	9.96457	0.0103719	0	-2.79594	2.64	-0.00505111	7.69847	3.05367	3.20112	5.92902	5.56039	2.02149	1.21049	3.27485	3.16426	0.104588	-0.0797291	-1.14877	-1.9229	-3.50803	-3.39744	7.58227	7.83323	3.12194	0	0.185744	-0.412664	-1.52038
8857	2B	T. Botanicos	2015-04-05	-19.081	-40.0007	0.0256304	-5.41272	6.35685	-2.2877	2.29838	-5.85916	6.7627	-2.20653	2.54188	-3.30232	3.75943	-4.92571	5.17989	-1.27308	-0.0149543	-9.53297	11.2206	0.00806171	0	-3.42932	3.88571	-0.00736838	6.12567	1.94544	1.90486	3.04123	2.79772	1.09316	1.01199	1.90486	1.86427	0.0379577	-0.0432118	-1.50426	-2.03186	-3.61467	-3.57408	6.15863	6.08706	1.92675	0	-0.0826982	-0.220009	-1.76104
8857	2C	T. Botanicos	2015-04-05	-19.081	-40.0007	0.0247638	-4.73048	6.20658	-2.31323	2.32313	-5.32489	7.03875	-1.91696	2.16462	-2.51137	3.07605	-3.42279	4.78001	-1.59994	-0.0148632	-7.51421	9.87924	0.0100544	0	-2.67081	3.39856	-0.00537316	7.65202	3.05529	3.17417	4.16484	4.16484	2.342	2.06461	3.09491	3.13454	-0.0356222	0.0436319	-1.4622	-1.93772	-4.83049	-4.59273	7.57008	7.75914	3.10681	0	-0.285187	-0.331386	-1.66031
8857	2D	T. Botanicos	2015-04-05	-19.081	-40.0007	0	-4.92602	5.89684	-1.47421	2.22929	-5.50132	6.86766	-1.58208	2.37312	-2.76864	3.77542	-3.63159	4.85411	-1.33038	0	-8.14526	9.75053	0	0	-2.72413	3.5127	0	7.38626	3.03554	3.0715	5.15697	5.19292	2.13664	1.88494	2.99959	2.99959	0.0152123	-0.020744	-1.2073	-1.67474	-3.54447	-3.58042	7.3592	7.41866	3.05191	0	0.0782647	0.38208	-1.40735
8857	2E	T. Botanicos	2015-04-05	-19.081	-40.0007	0	-5.11195	5.83194	-1.90798	2.55598	-5.83194	6.65993	-2.01598	2.19598	-3.05997	2.62797	-4.85995	3.56397	-1.79998	0	-8.03593	9.16775	0	0	-2.844	2.91215	0	8.09445	3.5585	3.5945	5.46648	5.32248	2.9825	2.65851	3.6305	3.6305	-0.0774676	0.066531	-1.22946	-1.37345	-4.43343	-4.32543	8.06802	8.12461	3.57531	0	0.0607502	-0.370658	-1.31253
8857	2F	T. Botanicos	2015-04-05	-19.081	-40.0007	-0.0704567	-5.01979	6.1433	-1.6239	2.24164	-5.52556	6.61295	-1.55164	2.13326	-2.41868	2.85579	-3.64698	3.83121	-1.40714	0.0379229	-7.63787	9.3037	-0.0334903	0	-2.57229	3.07157	0.00983131	8.38435	3.90466	4.08529	5.38584	5.38584	3.21825	3.21825	4.01304	3.97691	-0.0331326	0.0391204	-1.11693	-1.22531	-4.58507	-4.51282	8.2619	8.53603	3.98534	0	-0.168674	-0.240589	-1.16993
8857	2G	T. Botanicos	2015-04-05	-19.081	-40.0007	0	-5.20692	5.89875	-2.00266	1.92984	-5.82593	6.69982	-2.00266	1.85701	-3.24067	3.67762	-4.40586	5.31616	-1.63854	0	-8.97923	10.1723	1.77636e-15	0	-3.22722	3.4234	0	7.48939	2.64658	2.82864	5.48672	5.48672	2.13681	2.02758	2.61017	2.57376	0.170562	-0.193559	-0.848976	-1.65004	-4.01682	-3.83476	7.34218	7.65614	2.73194	0	0.182334	0.0324112	-1.21201
8857	2H	T. Botanicos	2015-04-05	-19.081	-40.0007	0	-5.37919	5.83625	-1.96886	2.35559	-5.80109	6.25815	-2.14465	2.21496	-3.05876	3.12907	-4.32445	5.06277	-1.40633	0	-9.09541	9.86822	0	0	-2.77336	3.00186	0	7.8936	3.32304	3.3582	5.64348	5.538	2.65504	2.51441	3.32304	3.32304	-0.0521379	0.0533365	-0.895933	-1.38815	-3.42732	-3.25153	7.86509	7.92453	3.33991	0	0.13813	0.148169	-1.12268
8857	2I	T. Botanicos	2015-04-05	-19.081	-40.0007	0.0241689	-5.0659	5.47781	-1.90279	2.20563	-5.97484	6.27768	-1.9755	1.95112	-3.42981	2.24198	-4.99318	3.00549	-1.64828	-0.0121887	-9.12382	9.88606	0.00797683	0	-3.21117	2.53986	-0.006777	6.86398	2.28292	2.24656	4.39166	4.39166	1.73755	1.19219	2.35563	2.31927	-0.0439719	0.0287434	-1.60735	-2.11636	-3.57066	-3.46159	6.89552	6.82997	2.26542	0	0.174664	-0.808137	-1.92467
8857	2J	T. Botanicos	2015-04-05	-19.081	-40.0007	0.0865128	-4.68591	5.19741	-1.77507	1.91425	-5.59978	6.00974	-1.94431	1.84656	-3.23049	3.36967	-4.44899	4.11431	-1.53814	-0.0488753	-7.94998	8.89033	0.030582	0	-3.11295	3.24658	-0.0177435	6.5966	2.33187	2.33187	4.49808	4.36269	1.51955	1.07954	2.26418	2.33187	0.165666	-0.172804	-0.985132	-1.69592	-3.89597	-3.72674	6.5966	6.5966	2.33187	0	0.276683	0.0789786	-1.35294
8857	2L	T. Botanicos	2015-04-05	-19.081	-40.0007	-0.023721	-4.91614	5.93891	-2.54637	2.38426	-5.68058	6.81801	-2.20237	2.88115	-3.19615	2.99582	-4.41925	3.68381	-1.74371	0.014501	-7.92638	9.55587	-0.00923175	0	-3.01707	3.23818	0.00509334	7.54328	2.91842	2.95664	5.17351	4.9824	1.88642	1.77176	2.8802	2.72731	-0.177564	0.166434	-1.51533	-1.70644	-4.68776	-4.61131	7.51545	7.57701	2.9357	0	0.018298	-0.493328	-1.61968
3326	8A	Reta Guarita	2014-09-27	-19.0814	-40.0393	-0.109537	-5.35421	5.83689	-2.25173	1.84798	-6.2037	6.50171	-2.06706	1.92185	-2.84268	3.25149	-3.7291	3.8055	-1.51304	0.0751347	-9.19035	9.9079	-0.0330784	0	-3.25018	3.47067	0.0239132	7.03227	2.19388	2.04614	4.92702	4.92702	1.38132	1.04891	2.37855	2.19388	0.051685	-0.0591179	-1.20408	-1.8689	-5.00832	-4.82365	7.15215	6.90003	2.12363	0	-0.525616	-0.775121	-1.53523
3326	8B	Reta Guarita	2014-09-27	-19.0814	-40.0393	0	-5.36035	6.66422	-1.34009	2.24555	-5.68632	7.27993	-1.30387	2.20933	-2.78883	5.17926	-3.76673	6.15716	-1.23143	0	-9.51396	11.8282	0	0	-2.71109	4.62536	0	8.3683	3.11661	3.33392	5.47082	5.54325	1.81274	1.88518	3.15283	3.22526	-0.215501	0.400215	-1.37449	-1.12096	-3.54761	-3.43895	8.19636	8.58206	3.21348	0	-0.123364	1.26182	-1.27826
3326	8C	Reta Guarita	2014-09-27	-19.0814	-40.0393	-0.0478045	-4.25532	6.58991	-1.64376	1.76578	-5.19838	6.91636	-1.17223	1.87459	-2.11529	4.48615	-3.56616	5.64685	-1.53494	0.0247388	-7.59485	11.7124	-0.01601	0	-2.34287	4.46506	0.00752018	8.60481	2.91016	2.83762	6.28342	6.28342	2.00337	1.42302	2.91016	2.94643	-0.209204	0.443686	-1.29735	-1.44244	-4.67062	-4.45299	8.65529	8.52615	2.8818	0	-0.379893	0.47797	-1.35363
3326	8D	Reta Guarita	2014-09-27	-19.0814	-40.0393	0.0246595	-4.9871	6.00536	-1.74616	2.33007	-5.68875	6.57336	-1.64593	1.96254	-3.14946	4.06748	-4.48593	5.33713	-1.31181	-0.00875225	-9.10807	10.9837	0.00952773	0	-2.63858	3.3193	-0.00242506	8.11298	3.13462	3.13462	4.97227	4.97227	2.26592	2.16568	3.23486	3.23486	-0.0729041	0.0941547	-1.04185	-0.507257	-2.87949	-2.87949	8.11298	8.11298	3.13462	0	0.297482	0.448558	-0.797845
3326	8E	Reta Guarita	2014-09-27	-19.0814	-40.0393	0.023933	-4.86939	6.02451	-1.94054	2.09556	-5.83377	7.27463	-1.61908	2.27415	-2.61918	3.48855	-3.83358	4.77439	-1.47621	-0.0117847	-8.69347	10.7765	0.00820025	0	-2.70616	3.58401	-0.00478076	8.0415	2.75528	2.75528	5.64842	5.75557	1.7909	1.32657	2.71956	2.86244	-0.137851	0.183608	-1.49512	-1.74515	-4.17395	-3.95965	8.0415	8.0415	2.75528	0	-0.235068	0.0404135	-1.60633
3326	8F	Reta Guarita	2014-09-27	-19.0814	-40.0393	-0.0252152	-4.77595	6.18728	-1.6697	2.45978	-5.90881	6.84507	-1.12154	2.02125	-1.3408	3.11758	-3.31418	4.39662	-1.52352	0.0113289	-8.11817	10.499	-0.0101911	0	-2.03987	3.33055	0.00491859	8.85055	3.62474	3.51511	6.6579	6.6579	2.23607	2.12643	3.55165	3.5882	-0.175843	0.408862	-1.71069	-1.74724	-4.26878	-3.97643	8.93148	8.7453	3.57708	0	-0.719562	0.0498476	-1.72642
3326	8G	Reta Guarita	2014-09-27	-19.0814	-40.0393	-0.0246595	-5.02026	6.36832	-1.80631	2.38581	-5.47441	6.99713	-1.66657	2.24607	-2.6098	3.64344	-4.00717	5.91417	-1.42203	0.0102748	-8.83783	11.1933	-0.00958691	0	-2.62218	3.35636	0.00324239	7.96502	3.00435	3.21396	5.79909	5.76416	2.02619	2.16593	3.10915	3.10915	0	0	-1.1179	-0.943226	-3.4585	-3.31876	7.80281	8.17149	3.09657	0	-0.00990709	0.11925	-1.04729
3326	8H	Reta Guarita	2014-09-27	-19.0814	-40.0393	-0.0237286	-4.62526	6.61881	-1.80497	2.98211	-5.40455	6.91568	-1.137	2.27704	-2.91824	2.945	-4.14284	4.24382	-1.35966	0.0133806	-7.865	11.2322	-0.0084686	0	-2.94662	3.40866	0.00377235	7.56942	2.67101	2.74523	5.37998	5.34287	1.18665	1.44641	2.96788	2.85656	0.184699	-0.186393	-0.891466	-1.52232	-4.2684	-4.2684	7.51766	7.64371	2.70148	0	0.159761	-0.663298	-1.20338
3326	8I	Reta Guarita	2014-09-27	-19.0814	-40.0393	-0.0256043	-4.69121	6.35695	-1.9665	2.81109	-5.66166	7.0288	-1.3693	2.32586	-2.63835	4.22943	-3.94472	6.133	-1.18268	0.0117206	-8.20188	11.0936	-0.00965085	0	-2.42809	4.13511	0.00458252	7.7581	3.12982	2.64459	5.33198	5.33198	1.86077	1.5995	3.16714	3.20447	-0.229421	0.367777	-1.12522	-1.79707	-3.77528	-3.55133	8.11719	7.26976	2.92421	0	-0.085249	0.475038	-1.3885
3326	8J	Reta Guarita	2014-09-27	-19.0814	-40.0393	-0.0251737	-5.10638	5.72647	-2.63635	2.16257	-5.74153	6.18519	-2.03648	0.927553	-2.53049	2.26843	-4.25951	3.29173	-1.82477	0.0101125	-8.70652	9.74869	-0.0105998	0	-2.50006	2.51814	0.00425635	8.25696	3.49333	3.45804	5.39878	5.25764	2.32889	2.39946	3.59919	3.49333	0	0	-1.37616	-1.41145	-3.42276	-3.3169	8.28524	8.22512	3.47673	0	0.024223	-0.344427	-1.39608
3349	9A	Reta Guarita	2014-09-27	-19.0814	-40.0393	-0.0227917	-4.51256	6.64384	-1.68945	2.05203	-5.19283	7.052	-1.11122	1.57584	-3.18604	4.2629	-3.86631	5.45337	-1.24727	0.0112217	-7.95213	11.6868	-0.00810042	0	-2.85133	4.2768	0.00481394	7.43008	2.6682	2.60018	5.59336	5.59336	1.57978	1.57978	2.77024	2.70222	-0.290962	0.389306	-1.58347	-1.54946	-3.76033	-3.65829	7.47843	7.35868	2.64074	0	0.344981	0.366666	-1.56934
3349	9B	Reta Guarita	2014-09-27	-19.0814	-40.0393	0	-3.9133	6.30042	-1.68272	1.60445	-5.04816	7.12221	-1.52619	1.01746	-1.72185	3.05238	-3.28717	4.34377	-1.48705	0	-6.3221	10.1786	0	0	-2.15316	3.51516	0	8.46941	2.95166	3.42125	5.80837	5.7301	2.169	1.97333	3.42125	3.30385	-0.296385	0.525409	-2.37043	-2.4487	-5.69674	-5.54021	8.17874	8.93739	3.13158	0	-0.867861	-0.54039	-2.40415
3349	9C	Reta Guarita	2014-09-27	-19.0814	-40.0393	-0.0254386	-5.69678	5.76489	-2.64298	2.11619	-6.33134	6.47876	-2.12741	1.95755	-3.47584	2.86972	-5.18121	4.93203	-1.69115	0.0142212	-9.66881	9.76449	-0.00916995	0	-3.36094	3.29526	0.00538273	8.9035	2.83556	3.58909	5.41344	5.53242	1.16985	1.88372	3.35113	3.23215	-0.456204	0.376651	-1.88395	-1.88395	-5.09639	-4.97742	8.2695	9.54713	3.20948	0	-0.360009	-0.089801	-1.88395
3349	9D	Reta Guarita	2014-09-27	-19.0814	-40.0393	-0.0223734	-5.41862	5.75704	-2.00206	2.18083	-5.83372	6.49144	-1.6189	2.08504	-3.02384	3.13874	-4.93967	4.25631	-1.36345	0.00955712	-9.21528	9.77704	-0.00923175	0	-2.81032	3.06621	0.00419238	7.69643	3.09845	3.2581	5.20586	5.23779	2.26825	2.36405	3.09845	3.03459	-0.0626702	0.0650517	-0.892862	-1.91464	-3.38344	-3.28765	7.56511	7.83643	3.17572	0	0.0298543	0.19354	-1.44218
3349	9F	Reta Guarita	2014-09-27	-19.0814	-40.0393	0.0248241	-4.96125	6.46353	-2.25228	2.96935	-5.39311	7.20948	-1.31003	2.18415	-2.25228	3.00861	-4.09752	4.30421	-1.50633	-0.0144362	-7.90133	10.3136	0.0101886	0	-2.6585	3.32625	-0.00644776	8.39056	3.44375	3.44375	5.21047	5.13195	2.26594	1.83407	3.48301	3.32597	-0.0504241	0.067357	-1.77788	-2.60235	-4.95797	-4.87945	8.39056	8.39056	3.44375	0	-0.430714	-0.587172	-2.17934
3349	9G	Reta Guarita	2014-09-27	-19.0814	-40.0393	-0.0259334	-5.3295	6.41665	-2.41076	1.89616	-5.54307	6.91498	-1.73446	1.54022	-2.30398	2.99959	-3.87013	4.03183	-1.59209	0.00966104	-8.66824	10.4231	-0.0122387	0	-2.26856	2.9944	0.00445512	8.01341	3.99124	3.52851	5.73537	5.80656	2.56747	2.49628	3.92005	3.92005	-0.0309258	0.040263	-1.02757	-1.73946	-3.16323	-2.98526	8.35386	7.60178	3.78177	0	-0.0083879	0.0492194	-1.37663
[truncated: 97 more columns]
